# Supplementary material
Source: PubMed Central journal article supplement (PMC4542355)
Supplement: JVI.00453-15_zjv999090743so1.pdf [file JVI.00453-15_zjv999090743so1.pdf]

Supplementary material: Alignment of the CP and Rep amino acid sequences of representative geminiviruses and alignment of their full genome nucleotide sequences.

## CP alignment

```
>ACMV_J02057
----MSKRPGDIIISTPGSKVRRRLNFD-SPYRNRATAP-TVHVTNRKRAWVNRPM-
YRKPTMYRMYRSPDIPRGCEGPKVQSFEQR-----DDVKHL-----GI-
CKVISDVTRGPGGLTHRVGKRFCKIKSIYILGKIWLDETIKK-QNHTNNVIFYLLRDRRYPYGNAPQDFGQIFNM----
FDNEPSTATIKNDLRDRFQVLRKFHATVVG-----GP-YGMKEQALVKRFYR-LNHHVTYN-
HQEAGKYENHTENALLLYMACTHA-----SNPVYAT--LKIRIYFYDSIGN-
>ACSV_KJ437671
----MPSTSAPR-----SRRRNDD--WAWDSATRR-RVRPS--TGYVPSGPS-----SNKLP-----
SLOVDQDVYAAATA---IDVNTH-----GADVSLLTNFLRGTSEDARHTNETILYKLSLDLYIMVDDVHQV-
YSGKSVCCCLVYDAQPTGALP-DGSSIFSYNAD-
LLSQPAVWKVGVSEVCHRFFVVKRRWVFTLETNGCKAGTLFTNTAGTMGM-PPCNRSMYFHKFKCKRLGVSTEWK-
NSSGGTMDIKTGA-FVSCVCT-----WQRHGP*-
>ALCV_KP732474
----MVRTSSGSTYGSAQA-----LSWGRKSAS-TTVRSRPTLLGPIRSPSYQVKTRY-APHSP-----
QTKIHSANTSV-----VSGANE-----GY-GWHVSGVPIGSGFEDSHDKIKINSLNFKMQMMTSDAGTQ-
TTLWHNVYMFVLVKDNSGGAQVP-KFNMCMM----DNSNPATAEMDHDKDRFQMIRSWSFQFKGNSTSNV-----
-AY-DCAKNSHDFSANVK-LNSISEFK-SATDGSYANTQKNAYTMYFVPQT-----YDMVVD--
GHCTMKYTSMVW--
>BCSMV_HQ113104
----MTSSS-----KRRKRGSG--KTKTRKKAR-----YTKWTSSTT-----TSAAD-----
SLOVQTFWLWAED-----QSFNTG-----GG-CRLTSTFTRGSGENQRKSQETITYKVAVNLGISASTTVQK-
YCLTSHPICWLVDKTP-GIADLTPTDIFDVPTG-LNNWPSTWKVKREASHRFVVKRRWPFRLSVNGSTFSADYTKL---
-PV-PNTDNLCTINRFAGLGVRTTEWK-DTVSADASDIKGGALYIVLAPANG-----LVFTAR--
GVIKVYFKSVGNQ-
>BCTIV-A_JQ707949
----MAVQSQ-----KRYKTPP--ASWTRKRKTGGRTVSKKYQWKRPVR-----SNRAV-----
KLKMYDDMLGASGVG--STISND-----GM-ITMLNMYVQIGIGDSQRSNNLTVTRHLKFDMSLMASGAFWA-
SPNYMTQYHWVIVDRDVGSTFPTQLSTIFDIPDG-QAMPSTYRIRRDANERFIVKKKQWTHLMSTGTGYGGKQTYK---
-AP-SMPNYKKAMNINIRNINVKTLWK-DTGGGKYEDVKENAILYVVVNDNT-----DNTNMYATLFGNCRAYFY---
---
>BCTV-CALogan_M24597
----MRKYTRNTYTMSQ---KRVNPO--SAWPKKRRT-STTS--RKYQW-RRPV-----TKNRTL-----
KLKMYDDMLGAGGIG--STISNN-----GM-ITMLNMYVQIGIGDSQRAKNVTVTKHLKFDMALMGSSQFWE-
TPNYMTQYHWI IIDKDVGSVFPTKLSSIFDIPDN-GQAMPSTYRIRRDANERFIVKKKWRTHLMSTGTGYGGKETYK---
-AP-SMPNYKKPMNINVRNLMRTIWK-DTGGGKYEDVKENAILYVVVNDNT-----DNTNMYATLFGNCRAYFY---
---
>BCTV-CO_JN817383
----MRKYTRNTYTMSQ---KRVNPO--SAWPKKRRT-TTTS--RKYQW-RRPV-----TKNRTP-----
KLKMYDDMLGAGGIG--STISNN-----GM-ITMLNMYVQIGIGDSQRSNNVTVTKHLKFDMALMGSSPFWE-
TPNYMTQYHWI IIDKDVGSVFPTKLSSIFDIPDN-GQAMPSTYRIRRDANERFIVKKKWRTHLMSTGTGYGGKETYK---
-AP-SMPNYKKPMNINVRNLMRTIWK-DTGGGKYEDVKENAILYVVVNDNT-----DNTNMYATLFGNCRAYFY---
---
>BCTV-Mld_EU586261
----MRKYTRNTYTMSQ---KRVNLQ--SAWPKKRRT-TTTT--RKYQW-RRPV-----LKNRTL-----
KLKMYDDMLGSGGIG--STISNN-----GM-ITMLNMYVQIGIGDSQRANNITVTKHLKFDMALMGSSAFWE-
TPNYMTQYHWI IIDKDVGSVFPTKLSSIFDIPDN-GQAMPSTYRIRRDANERFIVKKKWRTHLMSTGTGYGGKETYK---
-AP-SMPNYKKPMNVNVRNLMRTIWK-DTGGGKYEDVKENAILYVVVNDNT-----DNTNMYATLFGNCRAYFY---
---
>BCTV-PeCT_JX487184
----MSRFTKGTFOMSQ---KRGTFQ--RAWPKKRKT---TTTTKKYQW-RRPL-----TRGRML-----
KLKMYDDMLGGGGVG--TTISNN-----GM-ITMLNMYVQIGIGDSQRANNITVTKHLKFDMALMGSSAFWE-
TPNYMTQYHWI IVDKDVGSVFPTKLSTIFDIPDN-GQAMPSTYRIRRDANERFIVKKKWRTHLMSTGTGYGGKETYK---
-AP-SMPNYKKPMNMSVRNLIKIWK-DSGGGKYEDVKENAIYVVVNDNS-----DNTNMYATLFGNCRAYFY---
---
>BCTV-PeYDV_EU921828
----MRKYTRNTYTMSQ---KRVNPO--SAWPKKRRT-TTTS--RKYQW-RRPV-----TKNRTP-----
KLKMYDDMLGAGGIG--STISNN-----GM-ITMLNMYVQIGIGDSQRSTNVTLTKHLKFDMALMGSSAFWE-
```

TPNYMTQYHWIIIDKDVGSVFPDKLDSIFDIPSN-GQAMPSTYRIRRDNERFIVKKKWTTHLMSTGTAYGGRDITYK---  
-GP-SMPNYKKPMNINVRNLNVRTIWK-DTGGGKYEDVKENAI IYVVVNDNT-----DNTNMYATLFGNCRCYFY---  
---

>BCTV-SpCT\_AY548948

-----MRKYTRNTYQM--SQKRKAPKFQ--TVWPKKRKT-MTS---KKYQW-KRPV-----QKNRSL-----  
KLKMYDDMLGSGGIG--STISNN-----GM-ITMLNNYVQIGIGDSQRSTNLTVTKHLKFDALMGSSGFWE-  
TPNYMTQYHWIIIDKDVGSVFPDKLDTIFDIPPEN-GQAMPSTYRIRRDNERFIVKKKWTTHLMSTGTAYGGRDITYK---  
-GP-SMPNYKKAMNINIRNLNIRTVWK-DTGGGKYEDVKENAI IYVVVNDNT-----DNTNMYATLFGNCRCYFY---  
---

>BCTV-Svr\_X97203

-----MRKYTRNTYTMSQ---KRKVNPO--SAWPKKRRT-TTSS--RKYLW-RRPV-----TKNRTL-----  
KLKMYDDMLGAGGIG--STISNN-----GM-ITMLNNYVQIGIGDSQRAKNVTVTKHLKFDALMGSSPFWE-  
TPNYMTQYHWIIIDKDVGSVFPDKLSSIFDIPDN-GQAMPSTYRIRRDNERFIVKKKWRTHLMSTGTGYGGKETYK---  
-AP-SMPNYKKPMNINVRNLNMRITWK-DTGGGKYEDVKENALLYVVVNDNT-----DNTNMYATLFGNCRCYFY---  
---

>BCTV-SvrPep\_FJ545686

-----MRRYTRNTYTMSQ---KRKVNLO--SAWPKKRRT-TTTS--RKYLW-RRPV-----TKNRTL-----  
KLKMYDDMLGAGGIG--STISNN-----GM-ITMLNNYVQIGIGDSQRANNVTVTKHLKFDALMGSSPFWE-  
TPNYMTQYHWIIIDKDVGSVFPDKLATIFDIPDN-GQAMPSTYRIRRDNERFIVKKKWTTHLMSTGTGYGGKDTYK---  
-AP-SMPNYKKAMNINVRNLNVRTIWK-DTGGGKYEYVKENAI IYVVVNDNT-----DNTNMYATLFGNCRCYFY---  
---

>BCTV-wor\_AY134867

-----MRKYTRNTYTMSQ---KRKVNPO--SAWPKKRRT-TTT--SRKYQW-RRPV-----TKNRTP-----  
KLKMYDDMLGAGGIG--STISNN-----GM-ITMLNNYVQIGIGDSQRANNVTVTKHLKFDALMGSSPFWE-  
TPNYMTQYHWIIIDKDVGSVFPDKLSSIFDIPDN-GQAMPSTYRIRRDNERFIVKKKWRTHLMSTGTGYGGKETYK---  
-AP-SMPNYKKPMNINVRNLNMRITWK-DTGGGKYEDVKENALLYVVVNDNT-----DNTNMYATLFGNCRCYFY---  
---

>BGMV\_D00201

-----MPKRDPWRHMAGTSKVSRSNGYS--PSGGMGSKS-NK-----ANAWVNRPM-  
YRKPRIYRMYKSPDVPKGCCEGPKVQSYEQR-----HDI SHV-----GK-  
VMCISDITRNGITHRVGKRFVKS VYILGKIWMDENIML-KNHTNSVIFWLVRDRRPPYGT-PMDFGQVFNM----  
FDNEPSTATVKNDLRDYQVMHRFNAKVSQ-----GQ-YASNEQALVRRFWK-VNNHVVYN-  
HQEAGKYENHTENALLLYMACTHA-----SNPVYAT--LKIRIYFYDSITN-

>CCDaV\_JQ920490

-----MVSTRSGGQYGT-----SRVTTVETLPMWATKRRR-RPRWPRKEKKPKIAGAVFVKARP-  
RRKSSKGVPPGCKGPKCTHTVDVI-----KTIYHD-----  
GRGSGMISNIDRDELGQREGRKIRVSRMIIRGKIWLVDVNNAS-VPGSNLAKIWIWFKDRRP-GTEPVAFNALMDM----  
SDSEPLSAFVKVDYRDRFIALHTMTVDLHG-----GK-DFRVDLDELDELVE-INSVLFV-  
HEDDGSVAHTIQNGIFIYACSDP-----RQTVQIT--AQARLYFYDSTSN-

>CGMV\_AF029217

-----MKRSADTIYSTP-SKARRRLTFD-TPRATPASLG-RSN---KRAWENRPM-  
NRKPMMYRLWRSPDVPYGCCEGPKVQSFEAR-----HDVKHT-----GT-  
FQCCSDVTRGMGLTHRVGKRFTIKTIGIWKIWMDDNIKL-KNHTNIVIFFLVRDRRPSGE-PVSFGSLFNM----  
FDNEPTTATVKQYRDRFQVMRRFHASVTG-----GQ-YASKEQALVKRFFRNINHRVVYN-  
QQEGA EYKNHHEALMLYMACSHA-----SNPVYAT--IKVRIYFYDSITN-

>ChCDV\_AM850136

-----MSTVTWG--NKRKRSRDS-SKAKSKSSGSYVPRSV-----SSRRE-----  
SLQVATFSWTSSGSG--IKFSTG-----GA-AYLVSNFPQGANDNCRHTNKTVLYKFMKNTVYLDPSHYP-  
KVFKCPFTFWLVYDKAPGASVP-STGDI FEGPSL-FPANPWTWTVSRAACHRFVVKKTWSVVVESNGVDPGKAQSSS-  
YY-GP-GPCNQIKSCNKF KRLGVSTEWK-NSSTGDVGDIKEGALYIVGAPSQK-----SDVYVN--  
GYFRVYFKSVGNQ-

>CLCRV\_AM501481

-----MSKRAADIVISTPASKVRRRLNFG-SPYACRVAAP-IVRVT-KQQAWTNRPM-  
NRKPRMYRMYRSPDVPYGCCEGPKVQSFESR-----HDIQHI-----GK-  
VMCISDVTRGTGLTHRVGKRFVKS VYVLGKIWMDENIKT-KNHTNSVMFFLVRDRRPPVDK-PQDFGEVFNM----  
FDNEPSTATVKNVHRDRYQVLRKQYATVTG-----GQ-YASKEQALVKKFVR-VNNYVVYN-  
QQEAGKYENHTENALMLYMACTHA-----SNPVYAT--LKIRIYFYDSVTN-

>CLGMV\_DQ641692

-----MAKRAGDIIISTPASKVRRRLNFD-SPYQNRVPVL-TARGT-RKQLWANRPM-  
YRKPRIFKLYRGLDVPYGCCEGPKVQSFQOR-----HDVAHV-----GK-

VICISDVTRGNGITHRVGKRFCKSVYVLGKVMMDENIKV-KNHTNSVMFFVVRDRRPPYGT-PQEFQGVFNT----  
YDNEPSTATVKNDLRDRFQVIRKIFYATVTG-----GQ-YASREQTLVRRFIR-VNNYVVYN-  
HQEAAKYENHTENALLLYMACTHA-----SNPVYAT--LKIRIYFYDSVTN-  
>CoGMV\_EU636712  
----MMKREAPWRTNAGTSKVRRLNFS--PRSGLGPKA-T-----AWVNRPM-  
YRKPRIYRTYRSPDVPKGCEGPKVQSFEQR-----HDISHV-----GK-  
VMCISDVTRGNGITHRVGKRFCKSVYILGKVMDDNIKL-KNHTNSVMFWLIRDRRPPYGT-PMDFGQVFNM----  
YDNEPSTATIKNDLDRYQVLHRFASKVTG-----GQ-YASNEQSLVRRFWK-VNNHVYVN-  
HQEAAKYDNHTENALLLYMACTHA-----SNPVYAT--LKIRIYFYDSILN-  
>CpCAV\_JN989420\_  
----MSGRYKQVYR-----RKKGOYA--KAYSALGVN-SKRELEQLVNQGRPL-----QLRRP-----  
ALQVAEYLWTSNKAG--VTFSPG-----GS-TFLFTNFPQGANENCRHTNRTITYKMAIKAWVALDGSMVN-  
RVCKFPVYFVLVYDKNP GD SNP-GPSAIFDTL---YQDQPGTWTVTRNVCHRFRVVKKQWSVMLEANGVDPSVKQGST-  
YY-GP-GPCYQWRQMNKFFKRLGVSTEWK-NSSTGDVADIKEGALYLVCAPAGG-----ATVRVG--  
GRFRMYFKSVGNQ-  
>CpCV\_GU256530  
----MSGRFKGQVYS-----RKRGRNA--KAYQALGVK-SQRELEQLVNQGRPI-----GNRRP-----  
SLQVAEYLWTTNKAG--VTFSPG-----GG-TYLFTNYPQGANENCRHTNRTITYKMAIKCWVALDGSMVA-  
RVAKFPVHFWLVYDKNP GD TNP-SPSAIFDSL---YQDQPGTWTVTRNVCHRFRVVKKSWVMLESNGIDPSKQSTS-  
YY-GP-GPCYNWRHMTKFFKRLGVSTEWK-NSSTGDVADIKEGALYLVCAPGG-----VTVRVG--  
GRFRMYFKSVGNQ-  
>CpRV\_GU256532  
----MP-----GTWGGKKR-SERKVVPSKYASGRI-PRNP----SAKRD-----  
ALQVATFSWTSSGSG--VKFSAG-----GG-VFLMTNYPQGANENCRHTNSTITYKLMTKNTVFLDSSVWP-  
LVCRVPPVFWLVYDKFP GASLP-STGDI FDGPVP-FKNNPWWTVSRAVCHRFRVVKKTWTVILESNQVDPTKKQSSS-  
YY-GP-GPCNQWRVSNKFFKRLGVSTEWK-NSSTGDVADIKEGALYIVVAPSQS-----CDVYVN--  
GYFRVYFKSVGNQ-  
>CpYDV\_KM377674  
----MPGPFSGKTY-----SKKGKYA--KAYKALGVK-NQKELEELVNAPACPV-----TPSP-----  
ALQVAEYFWTTDKNG--MMFRSG-----GG-TAHFTMYPQGSNENCSHSNQNTTYKMAIKCWVALDPTFYK-  
KVACVPVHFWLVYDKDPGNLTP-GCSTIFDTL---  
YQDYPGTWTVSRNVSRFRVVKKHHWHIILASNGTNPQDQDPAKYA-GP-GPVFQWKHMNKFFKSLGVSTDWK-  
NSATGEVADIKSGALYLVCAPSGG-----AVVSVG--GSFSMYFKSVGNQ\*  
>CpYV\_JN989439  
-----MNTSWG-----RKRTR---TGWNKGKAS-NQKQGANRRRTAPPP-----VPRRD-----  
SLQVATFSWTSTGAG--IKFSPG-----GS-VYLINTYPQGANENCRHTNSTLTYKLMTKNTVFLDANFWP-  
YVCKIPVFWLVYDKSPGASVP-NTGDI FDGTSI-FKNNPSVWTVSRAVCHRFRVVKKTWTVILEANGVDPTKKVSAS-  
YY-GP-GPCNQWKSSNKFFKRLGVSTEWK-NSASGDVADIKEGALYIVCAPSQG-----FDIYVN--  
GYFRVYFKSVGNQ-  
>CSMV\_M20021  
----MSPA-----SSWKRKRPS-SSSAQASKRRVYRPAVSRS-----LARRE-----  
PLQVQDFVWDTD-----VAFNRG-----GG-CYLLTSYARGSAENQRKTAETITYKVAVNLGCAISGTMQO-  
YCISRPVCWIVYDAAPTGS AV-TPKDI FGYPEG-LVNWPPTWKVARAVSHRFIVKRRWVFTMESNGSRFDRDYTNL---  
-PA-AIPQSLPVLNKFQKQLGVRTEWK-NAEGGDFGDIKSGALYLVMAPANG-----AVFVAR--  
GNVRVYFKSVGNQ-  
>DCSMV\_JQ948091  
----MPASS-----KRRGSS--SAGKRRKP-R-----YTKWTGSRS-----SASQD-----  
ALQVQTFQYAED-----QAFNAG-----GR-ALLLTAFTRGS AENQRKSQETITYKVSLSLGSASSTVQK-  
YCVKSQPICWLVDKTPGTGIADLVPSDIFDVPSG-LTNWPSTWKVKREVS HRFRVVKRRWPFTLSCNGSTFTADYTKL---  
-PV-PNTDNLVSVNRFAKGLGVRTEWK-DTVSAEASDIKGGALYIVLAPANG-----VVFTAR--  
GVIKVYFKSVGNQ-  
>DDSMV\_HM122238  
----MSPAGSY-----KRRSAASSSATPKRRRV-----YQAVSRPL-----SRRE-----  
PLQVQDFTWEQD-----SAFNAG-----GS-AYLLTSYARGSAENQRKTAETITYKVAINLGVAISGTMQO-  
YCVSSRPVCWLVDAA P SG TAV-TAQEIFGF PDG-LKNWPPTWKVARVSHRFIVKRRWVFTLESNGSNFATGYSSN---  
-PC-AIPQSLPVLNKFQKQLGVRTEWK-NTAGGDFGDIKSGALYLVLAPANG-----LTFVAR--  
GNIRMYFKSVGNQ-  
>DfasMV\_JX458740  
----MKRPSEGRYK---GNVYKRVKPG---TSGGNTSGG-SVVARRRRSGW-----RPS-----  
PLQFIQYTTWTGGSP---ITVGAG-----GY-

VALLTSYPRGSDKDHRTGETLTYKVGLDLVFNYSKMATGRIARTHFCVWLVDYDSQPSGTLP-AAHGIFDLIDS-  
FTDYPATWKINRDMGHRFVIKRRVWNWLEADGSISTSNYSGA----PS-APAKSSVFNKFKVRLGVRTEWK-  
NTTTGGIGDVSKGALYIVVARQL-----YDIDVR--GRLRVYFKSVGNQ\*  
>DoYMV\_AM157413  
----MPKRSFDMAFSTPRPSVRRRLNFD-NPSATPMSVR-RTPSTSRRRQWTNRPM-  
NRKPRLYRMYRSRDVPGCEGPKVQSFEQR-----HDISHT-----GK-  
VMCVSDVTRGNNLTHRVGKRFVKSUYIIGKIWMDENIKT-KNHTNTVMFWLVDRRPFPGT-PMDLGQVFNM----  
YDNEPSTATIKNDLRDRYQVLRKFDSTVTG-----GQ-YASREANVIKRFWR-VNNYVVHN-  
HQEAAKYENHTENALLLYMACTHA-----SNPVYAT--LKI?IYFYDSISN-  
>DSV\_M23022  
----MSSSM-----KRRKRTDE---GSGSRRFT-KKKSAAKGR TSSSRAI-----RP-----  
ALQIQSFVVSAGAAT---IAVPTG-----GV-CHLLSSYSRSGEGDRHTNETVYKAAFYHFSANAGPCA-  
YSSIGVGLWLVYDAQPSGQVP-AVTDIFPHDTT-LQSFYPTWKVGREVCHR FVVKRRWCFTMETNGRIGSDKPPSN--  
A-VW-PPCKRSIYFHKFATGLGVKTEWK-NTTDGGVGSIKKALYFVIAPGSG-----IDFTLF--  
GTCRMYFKSVGNQ-  
>EcmlV\_HF921459  
----MVTTRSG-----RNYQAQA--LTWARKRR-SSLARSTIIGPIRRPN-YQYKTRY-TPHRP-----  
QHKIHSLSQTRV-----VSGSDN-----GY-GWHVSGVNI GSGFEDRHS DKIKI INLRFMMQLKTS DAGQQ-  
ASCYHNVMFLVRDNSGGAQVP-KFN SIVMM----DNSNPATAEVDHDSKDRFSIVRRWKFSFKGNSSKNGT-----  
-AY-DCARNLIDFN RNVK-INSVSEFK-SATDGSYANTQKNAWVLYIVPQI-----YDCIVD--  
GHVKIKYVSIV---  
>ECSV\_FJ665632  
----MKRKRNEAV-----PAGRRYPQR-RRMYRPRKPFPRPV-YTRSS---SVKRP-----  
ALQISGLVYGNSSSTG--AVKINT-----GA-LSLVTAFAKAGTAE ECRHSNQTIVKSFDISGTLVQSPTSS-  
NCGPVVVYFWLIYDSEPRQAIP-NITDVFSMP---WTSVPSSWRISRSSSHRFVVKRKHWHYELMSDGVLPQSNTKVQ---  
-THNPVSRNMDFSKYINNLGVPT EWM-STGDGTIGDIKKGALYLAACRQGIVGDATKITIEVEFI--  
GQSRTYFKSIGYQ-  
>EMSV\_JF508490  
--MVYERKRK DPR-----RSDESAG--SARKRPRAP-AGRSMVS-----AVRRP-----  
ALQIREYPWQTLTQL--PIKITD-----GV-IFMVNTIDPGTGDDQRSKHQTMLYKMSFNCVLPDETTAL-  
IVAPFRVNFWLVDAAPOGKLP-ALSDIFVSP---YTKWNTWNVSR TNVHRFVVKRKHVVDYNSSGTAVGKKQSPG---  
-SEDFPVKNVVECNKFF EKLVRKTEWL-NTTDGTIGSVKKGALYLVANTRQMPAGDAVTTTCTTYMQ--  
GSTRLYFKSLGYQ-  
>ESV\_EU244915  
----MPLTAG-----KRRKRGD--ASSSKVARP-KLGRS--SAARAGKPS-----TRARP-----  
SLQIQTLQAAGQSM---ISVPSG-----GV-CDLLGSFARGSDENRHTNETVYKVALDYHFVATAGACK-  
YSSIGTG VVWLVDYDAQPGNCP-QVKDIFPHPDS-LSAFPYTWKVGREVCHR FVVKRRWLFTMETNGRIGSDTPGPT--  
S-CW-PPCRKNIYFHKFEAGLGVKTEWK-NTTGGDVGDIKKGALYIVIAPGNG-----LEFTVH--  
GNARLYFKSVGNQ-  
>FbSLCV\_JX094280  
----MARTRSG-----RQYSAQA--PSWGRKKTR-TPRSRPTLIGPIRRPN-YQIKTRY-APHRP-----  
QTKIHSLSAARV-----VSGSDN-----GY-GWHISDVPIGSGFEDRHS DKIRILNFNFKLQMR TSQQGQN-  
TSCWHNVYLFVRDNSGGTAVP-KFN SICMM----DNSNPSTAEIDHDSKDRFTIMRRRWFQFKGNSTSGSV-----  
-AY-DCARNTYDFRKFVK-LSSITEFK-SATSGSYANTQKNAWVLYFVPQT-----YDMTVD--  
GHCTIKYVSIV---  
>GCFaV\_JQ901105  
--MVMKKRSRQRK-----QRRRRRT--TGRSSAVRR-RA-----RPRSR-----  
PCQ---FAFHG-----NSFGGT-----PS-LFFLTPIALGTGAEDRTGPVLT VSSMYLKG VVLP SDNV---  
TDGLHDIYFWIILD RFP TGDP-SVSDIFTGSDN-SGSMIETLTRNRLNRKRFRILGSKKL VVG VNK KP-----  
-QE-SLPHSRAAFNIFQRR-RLVVAFKNDVSGGGRNDVERNRIYLSAASAG-----HTFRLYLN--GIVN-  
FYNGVIFQ-  
>HrCTV\_U49907  
----MRRYTRNTYQMGQ---K RKAPYQ--PSWSKRRKT---GPMRKYQWK RPAR-----KTKAL-----  
KLKMYDDMLGAGGLG--STISNN-----GM-ITMLN NYVQIGDSQRSTNTTITKHKMFD MALMGSSS FWD-  
TPNYMTQYHWI I IDKDVGSVFPVKLDDIFDI PSN-GQAMPSTFRIRRDSNERFIVKRKWTTHLMSTGAAYGSKDIYK---  
-GP-SMPNYKKGMNINIRNLNVKTIWK-DTGGGKYEDVKENAILYIVVNDNA-----DNTNMYATLFGNCR CYFY---  
----  
>HYVV\_AB236325  
----MSKRPADIGIFTPVSKVRRRLNFD-SQSANRASVP-IALATNKKRSWAQRPM-  
YRKPRMYRMYRSPDVP RCGE GPKVQSYEKK-----NDVGHS-----GT-

LLCVSDITRGNGLTHRVGKRFCKSVYIIIGKIWMDENIKT-KNHTNNVLFWLVRDRRPGST-PYGFQEAFNM----  
FENEPSTATVVKQELRDLRQLVLRHRSATVTG-----GQ-YASKEQAVIKRFBW-LNHHVTYN-  
HQEQAKYENHTENALLLYMACTHA-----SNPVYAT--LKIRVYFYDSVQN-  
>MaMPRV\_AY044133  
----MPKRDPWRSSAGTSKVSRLNYS--PGGGPKSNR-----ANAWVNRPM-  
YRKPRIYRMYRTPDVPRGCEGPKIQSFEQR-----HDVSHI-----GK-  
VMCISDVTRNGITHRVGKRFVKSUYILGKVMDDNIKL-KNHTNSVMFWLVRDRRPGYGT-PMFEGQVFNM----  
FDNEPSTATIKNDLRDRFQVMHKFYKVTG-----GQ-YASNEQSLVKRFBW-VNNHVYVY-  
HQEAAKYENHTENALLLYMACTHA-----SNPVYAT--LKIRIYFYDSIMN-  
>MiSV\_D01030  
----MVQKRKDLRRSDAGSAVRAKLHKA--STGKAFPVG-KRA-----  
PLQIRSYAWETPAT---ATTPSGPISITDGT-IFMCNTIDPGTGDDQRSRHTTMLYKMSLVVWLPWGPATTAQ-  
IVGPFVRVFWLVYDAAPTGVVP-KLTDIFDVA---YPKWNTWQVSRNSVHRFIVKRKWKVDYQSSGVPVGRQSSG--  
V-EY-APVNNVVECNKFFEKLRVKTEWA-NTSTGAIGDVKKGALYLCANTRQMPAGDSVTTSTCTMMQ--  
GSTRLYFKVLGNQ-  
>MSRV\_JQ624879  
--MAGSSRK-----RTRRGDE--VAWNSKRSR-LSAQRNASKRVPRNP-----RVRP-----  
SLQIQITITNGSSM---VPVKQP-----GY-CGLLGTYSRGSDENQRHTSETMTYKIALDLHFSITSAAAA-  
YSNSGTGVLWLIYDSQPNGAQP-TLKDIFAYEDS-LVAPYTWKVSREVCNRFVVKRRYFTTLESNGRRNDEQPPSN--  
S-VW-PPCKTHLYFHKFAKGLGVRTEWK-NDTAGSVGNIKKGALYIGIAPGNG-----VEFNVF--  
GKTRLYFKSIGNQ-  
>MSV\_AF329881  
----MSTS-----KRRRGDD--SNWSKRVPK-KKPSSAGLKRAGSK-----ADRP-----  
SLQIQTLQHAGTTM---ITVPSG-----GV-CDLINTYARGSDENRHTSETLTYKIAIDYHFVADAAACR-  
YSNTGTGVMWLVYDTPGGQAP-TPQTI FAYPDT-LKAWPATWKVSRELCHRFRVVKRRWLFNMETDGRIGSDIPPSN--  
A-SW-KPCKRNIYFHKFTSGLGVRTQWK-NVTDGGVGAIQORGALYMIAPGNG-----LFTTAH--  
GQTRLYFKSVGNQ-  
>ODV\_AM296025  
----MTDLKSKG-----KRRRDEG--ESSGRWKA-VYKRR--KTQYKVPV-----RPP-----  
ALCVLRQOWITPDKQS-VVVTNT-----PR-IDLITCFAAGKGDNRHTNQTIMYKFHLQGSVYVADASSK-  
FVTPLRLYHVLVYDAEPKQAMP-GIEDIFTMP---WNVLPSTWTIWRWAHRFVVKRWVHVDLVSDGKKVGSSTADTRY-  
-NY-VVGKNIVDCNKFIKGLRVSTEW-NTGDGKIGDIKKGALYLVCTRAGVTGDSASTGFSVVCN--  
LTHACYFKSIGLQ-  
>PanSV\_L39638  
----MSGAL-----KRRRSDE--VAWSRRKPV-KKQDTGFPLPRAGPSV-----RRGLP-----  
ALQIQTLTAAGDTM---ITVPSG-----GI-CSLIGTYARGSDENRHTNETLTYKVALDYHFVATAAACK-  
YSSIGVGVWLVYDAQPTGNSP-EVKDIFPHSDT-LSAFPYTWKVGREVCNRFVVKRRWCFMETNGRIGSDVPPAN--  
T-AW-PPCKKDIYFHKFCTGLGVKTEWK-NVTDGKVGAIKKGALYIVIAPGNG-----LEFTVH--  
GQCRLYFKSVGNQ-  
>PDSMV\_JQ948087  
----MPSSS-----KRRRGST--SGTKRRKP-----RTTKWTGSRS-----ASRE-----  
ALQVQFTWSED-----QAFNAG-----GR-AILLSAYTRGSGENQRKSQETITYKVALNLGVSASATVLK-  
YCCSQPICWLVYDKPTGITDLTPSDIFDVPSG-LQNW PSTWKVKREASHRFVVKRRWPFKLECNSTFQKDYTNL---  
-PV-CNTQNLVSVTRFAKGLGVRTEWK-DTTAESSDIKKGALYLVVAPANG-----LVFTAR--  
GVIKCYFKSVGNQ-  
>PSMV\_JF905486  
----MAASS-----KRRRGST--SATKRRKP-----RYTKWTSARS-----SNRD-----  
ALQVQFTWGED-----QAFNAG-----GR-AILLTAFTRGSANQRKSQETITYKVSINLGVSASATVLK-  
YCCSQPLCWLVDKSPGTGITDLTPSDIFDVPSG-LQNW PSTWKVKREASHRFVVKRRWPF TLSCNSTFQKDYTNL---  
-PV-CNTDNLVSVTRFAKGLGVRTEWK-DTTADASDIKKGALYLVVAPANG-----LVFTAR--  
GVIKVYFKSVGNQ-  
>SacSV\_Q0273988  
----MSSSLG-----KRRRSNG--GDWSKRSAKKKPAAGTPSRAGPGRGP-----RP-----  
ALQIATYQAAGTSM---VTVPSG-----GV-CELLATYARGSDENRHTNETITYKVALDYHFVASSAACR-  
YSSIGVGVWLVYDAQPSGNAP-QVTDIFPHPS-LSAFPYTWKVGREVCNRFVVKRRWFTTMETDGRIGSDIPRST--  
D-SW-PPCKRSIYFHKFATGLGVKTEWK-NLADGGVGSIKKGALYIVIAPGNG-----LEFTAH--  
GNARLYFKSVGNQ-  
>SCTAV\_HQ443515  
-----MSQ-----KRRKTSQ--TSWPKRKT-TSG---KNYQW-KRPV-----QKNRAL-----  
KLKMYDDMLGAGGIG--STISND-----GL-ITMLNMYVQIGIGDSQRSTNVTVTRHMKFDMALMASSGFWE-

APNYMTQYHWIIVDRDVGSVFPTKLDMIFDIPSN-GQAMPSTYRIRRDSNERFIVKKKWTTHMMSTGTDYGGKQTYK---  
-AP-SQPNYKKAMNINVRNINVKTIWK-DTGGGKYEDVKENALLYVVVNDNT-----DNTNMYATLFGNCRCYFY---  
---  
>SMaV\_KF806701  
----MPSSSSYTY-----KSK-----SPAKRARVEP-WPELTSLGYTPRDTV-LRGTRS--SDGSP-----  
SLQVINYTWKNDGSA--VTIGNG-----GG-VYLLTEFPRGDAEDQRHTGETLTYKVS LNLOFAVQEDYSK-  
YCNRAQNMVFLVYDAQPTGTNP-KITDMFHIAASQFFPIPATWMSRENSHRFVIKSKWMI TEVNGSGTAKDYTNA---  
-PC-YPAHFSLIFKSFVQRLGVRTEWK-NSTEGGIGAIKSGAMY LIMAPGNG-----MPLEAS--  
GNIRLYFKSIGNQ\*  
>SPLCV\_AF104036  
--MTGRMRVSPRFHPYGGRPVRRRLNFE--TAIVPYTGN-AVPIAARSYVPVSRGV-----  
RMKRRRGDRIPKGCVGPCKVQDYEFK-----MDVPHT-----GT-  
FVCVSDFTTRGTGLTHRLGKRVCVKSMGIDGKVVWMDDNVAK-RDHTNII TYWLIRDRRPNKD-PLNFGQIFTM----  
YDNEPTTAKIRMDLRDRMQVLKFKFSVTVSG-----GP-YSHKEQALIRKFFKGLYNHVITYN-  
HKEEKAYENQLENALMLYSASSHA-----SNPVYQT--LRCRAYFYDSHNN-  
>SpSCTAV\_GU734126  
----MSQ-----KMKMSQ--AAGKKKKKT-VYGK---KYQW-KRSV-----RKNRKI-----  
KLKMYDDMLGAGGVG--SAITND-----GM-ITMLNNYVQIGIGDSQRSSNVTVTRHLKYDMALMGSTGFWE-  
APNYMTQYHWIIVDRDVGSVFPDKLSMIFDIPSN-GQAMPSTYRIRRDNERFIVKKKWTTHLMSTGTDYGGKQTYK---  
-AP-SMPNYKKPLNVNVRNINVKTVWK-DTGGGKYEDVKENALLYVVVNDNT-----DNTNMYATLYGNCRCYFY---  
---  
>SSEV\_AF239159  
----MPLAGS-----KRKRADE--VAWSKRGTKKKPERTSAARAGPSRRI-----RP-----  
PLOIATFVAAGQSM---VSVPSG-----GV-CELLGSYARGADEANRHTNETVITYKVALDYHFVATAAACR-  
YSSVGTGVAWL VYDAQPTGTNP-TTKDIFGYSDS-LVAFPYTWKVSREVCHR FVVKRRCTFTMETDGRIGSDVPPAN--  
T-SW-PPCKRAIYFHKFFTGLGVKTEWK-NLTDGGVGAIKKALYLV IAPGNG-----LEFTCH--  
GQARLYFKSVGNQ-  
>SSMV\_1\_JQ948051  
-----MRPV-----RP-----  
FVAVMKYTWTPNGAG--VQVAAP-----GA-VYLMTNLPRGSSSEDQRHTGETLAYKLGIDLEVQVVSQAQFA-  
YANKSTHV MWLVYDAQPSGRLP-ATSDIFDYVEG-FQYIPHVWVRRDLCHRYIVKRKWMINLETNGASFGVDFSSR---  
-PV-TAPKYRAS FHKFVKRLGVRTEWK-NSDTGEIGDIQRGALYLVVAPGNN-----VPINIR--  
GYFRLYFKSVGNQ-  
>SSMV\_2\_JQ948052  
-----MPPPAK-----KKGSDS--GAGGSR-----VYQRRYY-GPRSSSGRAVRRP-----  
PLOFIQYTWTSNGSP--ITVGP-----GY-VALLTSFPRGSDCKRHTGETVITYKVGDLDFCVRDTNRYK-  
EIGSAIHCCWL VYDAQPTGTIP-GLGTIFDLVDN-FTEYPTTWKVNDRMGHRFVIKRRWTF TLQSDGHLGSNDYSRA---  
-PA-APCKYMI AFNKFVKRLGVRTEWR-NTTGDIGDVS RGALYIVMARGNA-----WSYEV--  
GRIRVYFKSVGNQ-  
>SSRV\_AF072672  
----MPTTAG-----KRKRTDD--AAWSKRARP-KAGRT--SAARPGTAV-----RRVRP-----  
ALQIQTLQAAGTSM---ITVPSG-----GV-CDILGSYSRGSDECNRHTNETVITYKVALDYHFVASAAACK-  
YSSIGTG VVWL VYDAQPQGNCP-TVKDIFPHPD T-LSAFPYTWKVGREVCHR FVVKRRWTF TMEVNGRIGSDMPPAT--  
A-VW-PPCRKNIYFHKFVTGLGVKTEWK-NTTGGEVGDIKKGALYIV IAPGNG-----LDFTVH--  
GNARLYFKSVGNQ-  
>SSV\_M82918  
----MPLSGM-----KRKRSDE----TGRKRSSGVKQGR TSAARAGSAV-----RRTRP-----  
SLQIQTLQAAGTSM---IEVPSG-----GV-CDLLGSFSRGSDEGNRHTNETVIYKVALDYHF IATAAACK-  
YSSIGTG VVWL VYDAQPSGNPP-TVKDIFPHPD T-LTAFPYTWKVGREVCHR FVVKRRWTF TMEVNGRIGSDIPPST--  
S-CW-PPCRKNIYFHKFVTGLGVKTEWK-NTTGGEVGDIKKGALYIV IAPGNG-----LDFTVH--  
GNARLYFKSVGNQ-  
>SWSV\_KJ187749  
--MAGPMRSS-----PNSSRSIV-PWP AEALRRGYTPSNSVLRGTRSGRSDRSP-----  
SLQVMNYSWSG TSA---PMFKTG-----GA-TYLLSTFASNGEDQSRGAETIIYKMAFKLVFAVTSTQLK-  
YVSRGMCVIWL VYDAQPTGTPK-EPKIDIFDYDTG-  
LSQSPMTWSVQSALCNSFVVKRRWK FELSVNGVSA AEDFSDNRVS-GK-TIPYSRSGFDKFKRLATRTEWK-  
NTEGGDMGDMQKALYVMAAPGNA-----MEFQAI--GNISVYFKSVGLQ\*  
>TbYDV\_M81103  
----MAGRYKGLVYS-----RKRGRYG--KTYQALGVK-SQRELEQLVNQPRPV-----SNRRP-----  
ALQVAEYLWTTNKTG--MTFSPG-----GS-TFLITNFPQGANENCRHTNRTITYKMAVKTWVALDGSMSF-

RVSKFPIYFWLVYDKNPGESNP-SPSAIFDSL---YQDQPGTWTVTRNVCHRFFVVKKTWSCMLESNQVDPNAKQSS-  
YY-GP-GPCYQWRHVTKFFKRLGVSTEWK-NSSTGDVADIKEGALYLVCAPGGG-----ATVRVG--  
GRFRMYFKSVGNQ-  
>TCTV\_GU456689  
MSGTWSLKRPRWHSPTYDLAPKTPVKRPAVRRALFNQA-QFSRVAARRRWSKFPVRGNKPYRYRKLKAS-----  
DYQIYKDKIGGDNG---WTVTFS-----GD-CTMLNNYVRGIGRDQDSVMTKTAHMHFNGLMANDAFWE-  
APNYMTMYSWIILDNDPGGTFP-KPSDIFDME---YKEFPSMYEVAESVKSRIKRVKTEHYLRSTGVAFGEKQNYK---  
-AP-NVGPVKKPIRMKFRNIWQPSEWK-DTAGGKYEDLKKGALLYVCICDNK-----  
ATQFSFNLKGQWTFYFINRDLMY  
>TGMV\_K02029  
----MPKRDAPWRLMAGTSKVSRSANYS--PRGSLPKRD-----AWVNRPM-  
YRKPRIYRSLRGPDPVPGCEGPKVQSYEQR-----HDISLV-----GK-  
VMCISDVTRNGITHRVGKRFCVKSIVYILGKIWMDENIKL-KNHTNSVMFWLVRDRRPPYGT-PMDFGQVFNM----  
FDNEPSTATVKNDLRDRFQVIHRFHAKVTG-----GQ-YASNEQALVRRFWK-VNNNVVYN-  
HQEAGKYENHTENALLLYMACTHA-----SNPVYAT--LKIRIYFYDSITN-  
>TLCJV\_AB100304  
----MSKRPADIVISTPASKVRRRLNFD-TPAMSRAAAP-TVLVTNKRRRTWTNRPM-  
YRKPRIYRMYRSPDVPKCEGPKVQSFESR-----HDVSHV-----GK-  
VCCITDVTRGLGLTHRTGKRFCVKSIVYIMGKIVMDENIKT-KNHTNTVMFFLVRDRRPPYSS-PQDFGQVFNM----  
YDNEPSTATVKNDMRDRFQVLRKFTSTVTG-----GQ-YACKEQSLVRRFFR-VNNHVYVYN-  
HQEAGKYENHTENALLLYMACTHA-----SNPVYAT--LKIRIYFYDSVQN-  
>TLCNDV\_U15015  
----MAKRPADIIISTPASKVRRRLNFD-SPYGARAVVP-IARVT-KAKAWTNRPM-  
NRKPRMYRMYRSPDVPKCEGPKVQSFESR-----HDVSHI-----GK-  
VMCISDVTRGTGLTHRVGKRFCVKSIVYVILGKIWMDENIKT-KNHTNSVMFFLVRDRRPTGS-PQDFGEVFNM----  
FDNEPSTATVKNMHRDRYQVLRKWHATVTG-----GT-YASKEQALVRRKFFR-VNNYVVYN-  
QOEAGKYENHTENALMLYMACTHA-----SNPVYAT--LKIRIYFYDSATN-  
>TLCSV\_AY044137  
----MSKRPADIVISTPASKVRRRLNFD-SPYSSRAAVP-IVQGTNKRRSWTYRPM-  
YRKPRIYRMYRSPDVPKCEGPKVQSFDKR-----HDLKHT-----GE-  
VLCISDVTRNGLTHRVGKRFCIKSIYIVGKIVMDENIKV-KNHTNTCMFWLVRDRRPTTT-PYGFGEVFNM----  
YDNEPSTATIKNDLRDRQVLRKFTASLSG-----GQ-YASKEQCVIRRFYK-IYNHIVYN-  
HQEQGKYENHTENALLLYMACTHA-----SNPVYAT--LKIRIYFYDSISN-  
>TLCYV\_AJ512761  
----MSKRPADIIISTPASKARRRLNFD-SPYVSRAAAP-IVRVT-KARSWTNRPM-  
NRKPKMYRMYRSPDVPKCEGPKVQSFDAK-----NDIGHM-----GK-  
VLCLSDVTRGIGLTHRVGKRFCVKSIVYVILGKIWMDENIKV-KNHTNTVLFWIVRDRRPTGT-PNDFQQVFNV----  
YDNEPSTATVKNDRDRFQVIRRFQATVTG-----GQ-YAAKEQAIIRKFYR-VNNYVVYN-  
HQEAGKYENHTENALLLYMACTHA-----SNPVYAT--LKVRSYFYDSVTN-  
>TPCTV\_X84735  
----MPYK-----RKLTSYF--PQSKRFRGA-KSGMAVVKTSASRR-----LYKKGKRK-----  
PDKRITYTYAFS-----SICTDK-----GT-IVYMNSWSLGLGPQRSSDIEILKSMYIRLTVALSENAAS-  
QVKTYVVKWALIVDQVPGETLV-GVADVYKTCPSYPYVQYAY-IADDNHSRFQVLRSGFLSLSGNGLAVGSSTRT----  
-GC-PAMKNMASINKFCKNLNVRVCYDADSATGDIASIKRGAVYLVIPD-----VEIRYG--FSCTMYHRN-  
GNA-  
>TSLCV\_AF130415  
----MPKRDAPWRLMAGTPKVSRSNQS--PRTGTGPKF-DKAH-----AWVNRPM-  
YRKPRIYRAWRTPDVPKCEGPKVQSYEQR-----HDISHV-----GK-  
VMCISDVTRNGITHRVGKRFCVKSIVYILGKIWMDENIKL-KNHTNSVMFWLVRDRRPPYGT-PMDFGQVFNM----  
FDNEPSTATVKTDLRDRYQVMHKFYGKVTG-----GQ-YASNEQAIVRRFWK-VNNHVYVYN-  
HQEAGKYENHTENALLLYMACTHA-----SNPVYAT--LKIRIYFYDSVLN-  
>TYLCCV\_AF311734  
----MAKRPADIVISTPASKVRRRLNFD-SPYTGRVAAP-TVRVT-RRQMWSNRPM-  
YRKPMMYRMYRSPDVPKCEGPKVQSCAR-----HDVSHT-----GK-  
VICISDVTRNGITHRVGKRFCVKSIVYVILGKIWMDENIKF-KNHTNTVMFFLVRDRRPSGT-PMDFQQVFNM----  
YDNEPSTATVKNDLRDRFQVRRKFFYSTVTG-----GQ-YACKEQALVRRFIR-LNTHVVYN-  
HQEQAKYENHTENALLLYMACTHA-----SNPVYAT--LKVRIYFYDSQMN-  
>TYLCSV\_X61153  
----MPKRTGDILISTPASKVRRRLNFD-SPYTSRAAAP-TVQGI-KRRSWTYRPM-  
YRKPRIYRMYRSPDVPKCEGPKVQSYEQR-----DDVKHT-----GV-

VRCVSDVTRGSGITHRVGKRFCIKSIYILGKIWMDENIKK-QNHTNQVMFFLVRDRRYPYGTSPMDFGQVFNM----  
FDNEPSTATVKNDLRDRYQVMRKFHATVVG-----GP-SGMKEQCLLKRFFK-INTHVVYN-  
HQEQAKYENHTENALLLYMACTHA-----SNPVYAT--LKIRIYFYDAVTN-  
>USV\_EU445697  
----MSSSLG-----KRRRSDE--GAWSKGKSK--KKAMRGSSRRPGPV-----RGPRP-----  
ALQIAQYIAAGTSM---VTVPSG-----GV-CELLATYARGSDENRHTNETVYKVALDYHFVLTAEACR-  
YSSIGVGVAWLVIYDAQPTGNAP-QVSDIFPHGDT-LAAFPTYWKVGREVCHRFFVVKRRWTFMESDGRIGSDIPRTT--  
D-AW-PPCKRSIYFHKFVTGLGVKTEWK-NVADGGVGAIKKGALYLVIAPNG-----LTFTAHA--  
GIARLYFKSVGNQ-  
>WDIV\_JQ361910\_  
----MSQV-----KRRTRRGDEVEWSKRKRL-RSSGSKGSATKLRK-----LPVRP-----  
SLQIQSLYYTLTTY---VDFKTG-----GE-SYLMASYARGSDERHTNETMTYKAALNLHLSASSDACK-  
YSNTGTGCIWLIYDAQPTGNKP-SPKDIFGYSDS-LNSWPTTWMVSREQCHRFFVVKRRWTFLETNGRLASDVPPSN--  
V-VW-PPCKKSINFHKFAKGLGVRTEWK-NKTDGGIGSIKKGALYFVIAPNG-----VEGRMF--  
GTIRMYFKSIGNQ\*  
>WDV\_X02869  
----MVTNKDSRG-----KGKRKMEEGESSGRWKGA-VYKR--RKQAYKVVVPV-----KPP-----  
ALCVFRYNWLNDRDRT-NIVVGNT-----PR-VDLITCFAQKADNNRHTNQTVLYKFNIQGTTCYMSDASAP-  
FIGPVRLYHVLVYDAEPKQAMP-DATDIFTMP---WNLLPSTWTVQRAWSHRFVVKRWTVNLTVDGRKVGSKTVDQRY-  
-NW-VVGKNIVDANKFFKGLRVTTEWM-NTGDGKIGDIKKGALYLISSTRGGVTGDSASTAFDVVCA--  
YTHACYFKAIGIQ-



# REP alignment

>ACMV\_J02057

-----MR---TPRFRIQAKNVFLTYPKCSIP-  
KEHLLSFIQTLN-LQSNPKFIKICRELHQ-----NGEPHLHALIQFEGKITITNNRLFDC-VHPSCSTSFHPNIOGAK-  
SSSDVKSYLEDKD----GDTVEWGFQFI--DGRSA-----RGGQOSAN-  
D----AYAKALN-SGSKSEALNVIRELVPKDFVLQFHNLSNLDRIQFQPPAPYVSPFPCS-SFDQVPVEIEE-  
WVADNV-----RDSA-----ARP-----WRPNSIVIEGDSRTGKTIWARSLGP--HNYLCG-  
HLDLSPKVFN-NAAWYNVIDDVD--PHY--LKHFKEFMGSQRDWSNTKYGKPVQI-  
KGGIPTIFLCNPGPTSSYKEFLAEKQEQALKAWALKNAIFITLLEPLY---SGSNQSHSOTSQEQASHPA-----  
>ACSV\_KJ437671

-----MNTEHGGPSGFSFQSSNMFLTYPSCNLA-  
PELIGSFLLSLL-SPYHVMFITVTSELHK-----DGTPHIALAQTDRVHTYSPGFFD-----VQGFHPNIOGAS-  
SPQTVLSYMLKS---PTGTFNYGSLRP--RGTRADAACGIGEDTAGGASSSSSPQADQRRGSRSELANDPGSDSKD-  
V----LMTSILAGSSSKQEFNGVKKAFPYDFCASLQWWEYAANKLF-DTPAVYQPPFPDS--YFHCHENMHD-  
WVRDNI---Y--EMTP-----E-----ASPLSLYICGPTSTGKSTWARSLGR--HNYWQN-NVDFT--  
SYD-VEAKYNVMDIP--FKY--CPCWKALIGGQKDFTVNPKYGKKLM-KGGIPSMVIVNDDE--  
DWMRAMTASQRSYF--ERNCCVVVLYEGDSFM---KDDVSSTSEECI\*-----  
>ALCV\_KP732474

-----MPSR---ASNFSLOGKSIFLTYPCCLI-  
PMFLIDYLYQLL-KNWDPTYASVCSEEHQ-----SGEPHLHCLVQMDKKIDIKDPSFFDI-KDPNGLSTYHPNTQIPR-  
SDADVADYISKG----GVFEERGLLSA--SS-----SSPKKSSD-  
S----IWTTILTESTSKSEFLSSCSTEOPYTYATQLRNLEYMASSEWPEPPTYQPSWTH---FPSVPESIKQ-  
WADENI---F--TD-----QKP-----DRPLTLIEGPKTGKTAWASSLGR--HNYFCG-GVDFS--  
FWD-NHASYNVMDIP--FOF--LPCKKELLSQSDFTVNEKYRKKTSV-PGGIPTIVLCNPDQ--SYKTALSSSDMYE-  
--WSELNVIHVCINDKFY---W-----  
>BCSMV\_HQ113104

-----MASFVSETSDAR--GQTGAPRSPSGEVGAPGAV---AACFEVRSRNIFLTYSKCHLD-  
PVFMQEHLSLL-RRFEPTYVYVAREEHQ-----DGSYHLHCLVQCKKYVRTKSAKFFD-----VEEFHPNVQONAR-  
MPHKVLAYIKKN---PLCFVETGVFQASTKQKKK-----VDAPSTKD-  
A----KMAEIIKSSTCKEDYLSMVRNTPFDWATRLQFQYSAESLFPVPTPYMDPFGMP--AQDEHPVIGA-  
WLQAEI---F--SDRR-----PD-----ERRRSLYICGPTRTGKTSWARSLGA--HNYWQH-SVDFL--  
NLV-ANATYNVIDDIP--FKF--VPCWKGLVGCQFDITVNPYKGRRML-KNGVPSIILVNEDE--  
DWLQMQPSQVGF--ETNCIIHYMYAGESFF---EA-----  
>BCTIV-A\_JQ707949

-----MPRAPNRNRPTPNQ---  
PGYLRFOKKNFLTYSQIGGDFKDYIFEKLTLL-  
ESYVILFLAVSLEHHQPTTEQPEGGFHTHCIIQCDKLDVNGNLFFNI-I-LPDGRTIHPRIDGLN-APKRAFHEYITKE-  
--DTSPTTFGELRL--GGRS-----PNSIGNSN-M-----  
EWRRILDSSNTKEEFFSNIRESCPTDFVLRWPSILSFAKYHFRPVVQPYTPRWTE---FSRLPDTIKE-WAEQNI---  
YFVSSDCLHYEIIYNRP-----VRPRSLYICGPSRTGKTQWARSLGR--HHYMSGMVLWDWS--  
LYDIDHTTYHIIDDIR--YQKIQQELFKSIIGCNEDYSVWIKHKPNLVI-PGGRPCIAITNPDM--  
DWIPCMSESMKDF--YANCDVYYLASDEVVY---S-----  
>BCTV-CALogan\_M24597

-----MPP---TKRFRIQAKNIFLTYPCCLS-  
KEEAEIQIQRIQ-LSSNKYIKIARELHE-----DGPHLHVLLQLEGKVQITNIRLFDL-VSPTRSAHFHPNIOGAK-  
SSSDVKSYLEDKD----GDTIEWGEFQI--DGRSA-----RGGQOTAN-  
D----SYAKALN-ATSLDQALQILKEEQPKDYFLQHNLLNNAQKIFQRPDPWTPPLFPLS-SFTNVPEEMQE-  
WADAYF---G--VDAA-----ARP-----LRYNSIIEGDSRTGKTMWARSLGA--HNYITG-  
HLDFSPRTYY-DEVEYNVIDDVD--PTYLKMKHWHKHLIGAQKEWQTNLKYGKPRVI-  
KGGIPCIILCNPGPESSYQFLEKPENEALKSWTLHNSTFCKLQGLF---NNQAAASSQGDSTL-----  
>BCTV-CO\_JN817383

-----MPR---SPSLQIKAKNIFLTYPRCSVI-  
KEDALEIWKNI-CPDKLFRVRSREKHQ-----EGSLHLHALIQFKGAQFRNPRHFDI-THPSSSSTFHPNFQGAK-  
SASEVKQNEKD----GDYVDWGTFOV--DGRSA-----RGGQOTAN-  
D----AAAEALN-AGNAEALQIIREKLPEKFIQYHNLPNLEAIFLPPDIYQPPYPQS-SFTQVPEIVQE-  
WADSYF---R--GCVS-----ARP-----FRYNSIIEGDSRTGKTMWRCLGP--HNYITG-

HLDFSLKTYS-DNVLYNVIDDVD--PNYLKMKHWHKHLIGAQREWQTNLKYGKPRVI-  
KGGIPSIILCNPPEGSSYQDFLNKSENEALRSWTLQNSVFAKLTSPLF---DNNQEASSQDQSSL-----  
>BCTV-Mld\_EU586261

-----MPR---RPTFQIRVKNVFLTYPRCSII-  
KEDALEILKNIP-CPSDKLFI RVSQEKHQ-----DGSLHLHALIQFKGKAQFRNPRHFDI-THPSCSSTFHPNFQGAK-  
SASDVKQYIEKD----GDYVDWGTFOI--DGRSA-----RGGQOTAN-  
D----AAAEALN-AGNAVDALQIIREKLPEKFI FQYHNLKPNLEAIFLPPDIYQPPFQS-SFTRVPEIVQE-  
WADSYF---G--VDAA-----ARP-----FRYNSLILQGDSRTGKTMWARSLGP--HNYISG-  
HLDFSLKTYH-DDVLYNVIDDVD--PSYLKVKHWHKHLIGAQREWQTNLKYGKPRVI-  
KGGIPSIILCNPGDGSSYEDFLDKSENEAL?SWTIQNSIFFKISSPLF---DKDTEASSQGQASL-----  
>BCTV-PeCT\_JX487184

-----MPFYKKAKNFFLTYPQCSVT-  
KEDALEQLLAIN-TPSNKKYIRICRELHE-----NGEPHLHALIQFEGKVQIRNARYFDL-QHRSTSKQFHCNIQGAK-  
SSSDVKSIVSKD----GDHIDWGEFQV--DGRSA-----RGGQOTAN-  
D----AAAEALN-AGNALEALQIIREKLPEKFI FQYHNLKPNLEAIFLPPDIYQPPFPLS-SFTRVPENIQE-  
WADSYF---G--LDPA-----ARP-----YRNSIIIEGDSRTGKTMWARCLGP--HNYITG-  
HLDFSLKTYS-DNVLYNVIDDVD--PNYLKMKHWHKHLIGAQREWQTNLKYGKPRVI-  
KGGIPSIILCNPPEGSSYQDFLNKSENEALRSWTLQNSVFAKLTSPLF---DNNQEASSQDQSSL-----  
>BCTV-PeYDV\_EU921828

-----MPR---SPSFQIRAKNVFLTYPRCSII-  
KEDALEILKNIP-CPSDKLFI RVSQEKHK-----DGTLHLHALIQFKGKAQFRNPRYFDI-THPFNSTTFHPNLQGAK-  
VTSQDVKQYIEKD----GDYIDWGTFOV--DGRSA-----RGGQOTAN-  
D----AAAEALN-AGTAAEALQIIREKLPEKFI FQYHNLKPNLEAIFLPPDIYQPPPLSLS-SFTRVPEIIQE-  
WADSYF---G--VDAA-----ARP-----FRYNSIIIEGDSRTGKTMWARSLGP--HNYISG-  
HLDFSLKTYN-DDVLYNVIDDVD--PNHLKMKHWHKHLIGAQREWQTNLKYGKPRVI-  
KGGIPSILLCNPPEGSSYQDFLNKSENEALKSWTLQNSIFAKLSGPLF---DKDTETSSQGQSPL-----  
>BCTV-SpCT\_AY548948

-----MPFYRKAKNYFLTYPQCSIS-  
KEEALEQLLAIS-TPSNKKYIRISRELHD-----NGEPHLHALIQFEGKVQIRNARYFDL-QHRSSSKQFHCNIQGAK-  
SSTDVKSIVAKD----GDYIDWGEFQI--DGRSA-----RGGQOTAN-  
D----AAAEALN-AGTAAEAMQIIREKLPEKYIFQFHNKPNLEAIFLPPPEIYKPPFPLS-SFTRVPEVIQE-  
WADSYF---G--VDAA-----ARP-----FRYNSIIIEGDSRTGKTMWARSLGP--HNYISG-  
HLDFSLKTYS-DDVLYNVIDDVD--PNYLKMKHWHKHLIGAQREWQTNLKYGKPRVI-  
KGGIPSIILCNPPEGSSYQDFLNKQENEALKSWTLQNSTFAKIWGPLF---DKASETPOEGHSTM-----  
>BCTV-Svr\_X97203

-----MPFYKKAKNFFLTYPQCSVT-  
KEDALEQLLAIN-TPSNKKYIRICRELHD-----NGEPHLHALIQFEGKVQIRNARYFDL-QHRSTSKQFHCNIQGAK-  
SSSDVKSIVSKD----GDHIDWGEFQV--DGRSA-----RGGQOTAN-  
D----AAAEALN-AGNALEALQIIREKLPEKYIFQYHNLKPNLEAIFLPPDLFQPPFPLS-SFTRVPDIIQE-  
WADSYF---G--LDPA-----A-P-----FRYNSIIIEGDSRTGKTMWARCLGP--HNYITG-  
HLDFSLKTYS-DNVLYNVIDDVD--PNYLKMKHWHKHLIGAQREWQTNLKYGKPRVI-  
KGGIPSIILCNPPEGSSYQDFLNKSENEALRSWTLQNSVFAKLTSPLF---DNNQEASSQDQTSL-----  
>BCTV-SvrPep\_FJ545686

-----MSFYKKAKNFFLTYPRCSVT-  
KEDALEHLLAIP-RPSNKKYIRVSRELHE-----DGALHLHALIQFKGKAQFRNPRHFDI-THPSNSTTFHCNIQGAK-  
SSSDVKSIVGKD----GDYIDWGTFOI--DGRSA-----RGGQOTAN-  
D----AAAEALN-AGTAAEALQIIREKLPEKFI FQYHNLKPNLEAIFLPPDIYQPPFPLS-SFTRVPEIIQE-  
WADSYF---G--VDSA-----ARP-----FRYNSIIIEGDSRTGKTMWARSLGP--HNYISG-  
HLDFSLKTYN-DDVLYNVIDDVD--PNYLKMKHWHKHLIGAQREWQTNLKYGKPRVI-  
KGGIPSIILCNPPEGSSYQDFLNKSENEALRSWTLQNSVFAKLTGPLF---DNNQEASSQDQSSL-----  
>BCTV-wor\_AY134867

-----MPR---SPSFQIKAKNIFLTYPRCSII-  
KEDALEILKNIP-CPSDKLFI RVSQEKHQ-----DGSLHLHALIQFKGKAQFRNPRHFDI-THPSSSSTFHPNFQGAK-  
SASDVKQYIEKD----GDYVDWGTFOV--DGRSD-----RGGQOTAN-  
D----AAAEALN-AGNAAEALQIIREKLPEKFI FQYHNLKPNLEAIFLPPDIYQPPFQS-SFTQVPEIVQE-  
WADSYF---G--VDAA-----ARP-----FRYNSIIIEGDSRTGKTMWARSLGP--HNYISG-  
HLDFSLKTYH-DDVLYNVIDDVD--PAYLKMKHWHKHLIGAQREWQTNLKYGKPRVI-  
KGGIPSIILCNPGDGSSYQDFLNKSENEALKSWTIQNSAFVKLSGPLF---DKDTEASSQGQSPL-----  
>BGYMV\_D00201

-----MPP---PQFRVQSKNYFLTYPRCTIP-  
KEEALSQLOKIH-TTNNKFKIKVCEERHD-----NGEPHLHALIQFEGKFICTNKRLFDL-VSTTRSAHFHPNIOGAK-  
SSSDVKEYIDKD----GVTIEWGQFQV--DGRSA-----RGGQOSAN-  
D----SYAKALN-ADSIESALTILKEEQPKDYVLQHNIRSNLERIFFKVPEPWVPPFPLS-SFVNI PVVMQD-  
WVDDYF---G--RGA-----ARP-----ERPISIIVEGDSRTGKTMWARALGP--HNYLSG-  
HLDFNSRVYS-NSVEYNVIDDIS--PNYLKCLKHWKELIGAQKDWQSNCKYGKPVQI-  
KGGIPSI V L C N P G E G S S Y K D F L N K E E N R A L H N W T I H N A I F V T L T A P L Y ---Q S T A Q D C Q T-----  
>CasCV\_JQ412057

-----  
MPFFYNARYALITYAQCDALDGFVMDHFSGLG-----AECIIAREIHQ-----  
DGGVHLHCFIDFGRKFRSRRTDIFD-----VDGRHPNIEPSWGTPWRGYDYAIKD---GDVICGGLERP--EQP---  
-----RSEVVKDWD---QWAEITN-  
ARDRDHFVWELVHHLDPKAAACNYGOLAKYADWRFASVPPVYESPGGIS--FIGGDVDGRDAWCEQSH---I--RSGE---  
---PLP-----GRCMSLVLYGDSRSGKTLWARSLGT--  
HLYTVGMVSGEELKKASNDV KYAIFDDIRGGIKF--FPAFKEWLGAQAYVTVKELYREP KLV-KWGKPSIWI SNDDP--  
--RLGMDASDVS----WLEHNCYFVEVSSPIF---RANTE-----  
>CCDaV\_JQ920490

-----MAST---SSSFRFSAKNIFLTYPKCPCCT-  
KEHLQAFRLRTL-ARFTITYMCVCEELHE-----SGDPLHAMIQCKKRVETQNPRFFDL-LSVRRERSFHPCIESLK-  
SPAASRKYLMKD----GNYVEEGRFNS--RA-----RSPQKDQE-  
K---LWRDVLLEATDERSFLNLVREL RPSDFVLRWPAISAFARDNYCRLREPFIPAFTE---FPNLPEHV KQ-  
WAQONI-----LCVS-----KPF-----LQPKSLYICGPRSRTGKTAWARSLGL--HNYFTG-AIKFH--  
DYN-DHALYNVIDDIQ--YTKISHEVMKSLVGSQKNITVNIKYRDPRTI-KGGIPSIICVNPDM--  
DWLTYSPTIKDWW--NQNVLMHYMDPTDVFY-----  
>CGMV\_AF029217

-----MPR---SGAFRVNAKNIFATYPRCSLP-  
KEEALELLRQIP-TAVNKKFKIKVARELHE-----DGEPHLHVLLQFEGKLQITNPRFFDL-VSGNRSVAFHPNIOGAK-  
SSSDVKSYIEKD----GDTISWGEFQI--DGRSS-----RGGQOSAN-  
D----AYAAAIN-SGSPTKALNIVKELAPKDFVLHYHNIKSNLDRIFSKPLEPYSCPFRLN-SFNNVPQIMKD-  
WASINV-----VDAA-----ARP-----DRPISIVIEGESRTGKTMWARSLGA--HNYLCG-  
HLDLSPKVYS-NNAWYNVIDDVD--PHY--LKHFKEFMGAQHDWQSN TKY G K P I Q I -  
KGGIPTIFLCNPGPNSSYKSFLEDEDKNKDLKQWALKNAIFVDISFPLY---SNSNKSQTQNS-----  
>ChCDV\_AM850136

-----MPSA---NKNFRFQSKYVFLTYPKCSSP-  
RDDLFEFLEWEKL-TPFLIFFLGVATELHQ-----DGTTHYHALVQLDKKPWIRDPSFFD-----FEGNHPNIOPAR-  
NSKQVLEYISKD----GDIKTRGDFRD--H-----KVSPR KSD-  
A---RWRTIIQTATSKEEYLDMIKEEFPHWTTKLOWLEYSANKLFPPQPEAYVSPFTES--DLRCHEDLAQ-  
WRDTHL---Y--QEPR-----RTG-----ARVPSLYICGPTRTGKTTWARSLGR--HNYWNG-TIDFT--  
TYD-EHATYNVIDDIP--FKF--VPLWKQLIGCQFDFTVNPKY G K K K K I -KGGVPSIILTNRDE--  
DWIPAMSEHQKEYF--TDNCEIHYMDDGETFF--ARESSSH-----  
>CLCRV\_AM501481

-----MP---PKRNGIYSKNYFITYPKCSLT-  
KEEALSQLLNIQ-TPTPKKYIRICRELHE-----DGTPHLHVLIQFEGFKCQNMRFDFL-VSPSRSAHFHPNIOGAK-  
SSSDVKSYIEKD----GDILDWQFQI--DGRSA-----RGGQOTAN-  
D----AYAAALN-AGSKSEALRVIKELAPKDFVLQFHNLNANLDRIFQEPAPYVSPFSSS-SFDQVPEELEV-  
WAAENV-----VSAA-----ARA-----NRPISVIEGDSRTGKTMWARSLGP--HNYLCG-  
HLDLSPRVYS-NDAWFNVIDDVD--PHY--LKHFKEFMGAQKDWQSN TKY G K P V Q I -  
KGGIPTIFLCNPGPNSSYKEFLDEEKNSALKNWALKNAIFITLDRPMY---SGTNQSTAQGSEEAQQEEESRS-----  
>ClGMV\_DQ641692

-----MPP---PTKFRINAKNYFLTYQCCLT-  
KEETLARLLAIV-TPTNKKFKIKICRELHE-----DGSPHLHVLMQFEGKFQCKNQRFDFL-VSPTRSAHFHPNIOGAK-  
SSSDVKSYMDKD----GDTLEWGEFQI--DGRSA-----RGGPQTAN-  
D----AYAQALN-TGSKHEALKVIKELAPKDFILQFHNLNSNLDRIFVQEVPIYRSPFLSS-SFNQVPEEEL-  
WVSENV-----MSAA-----ARP-----LRPKSIVLEGDSRTGKTMWARSLGP--HNYLCG-  
HLDLSPKVYS-NDAWYNVIDDVD--PHY--LKHFKEFMGAQRDWQSN TKY G K P V Q I -  
KGGIPTIFLCNPGPGASYIQFLNEEKQSALKTWALKNAEFVTLTEPLY---SSTNQGPTQDCQET-----  
>CoGMV\_EU636712

-----M-----SGRFRKQGVSFLLTWPKCPVT-  
KESAIHQILALA-LPTNIIYIRVCEEKHQ-----DGSPHLHALVQFQKFKVCTNCRLFDL-SHPQNSRQFHCHIETAR-  
SSSDAKSYIEKD----GVFCEWGTQFQV--DGRSA-----RGGQOTIN-

E----AYAKALN-SGSKDEALTVIKELVPKDYVCQFHNLNANLERIFAPPVHVFEPPFPLS-SFNNVPAVINQ-  
WVNDNI-----MDAA-----ARP-----FRPISIVIEGPSRTGKTLWARSLGR--HNYLCG-  
HLDLSPKVYS-NEAWYNVIDD--PHY--LKHMKEFMGAQRDQSNCKYKPIQI-  
NGGIPTIFLCNPGPTSSYKEYFEEKNSAIYDWAKKNAIFVTIEEPFF---DTADQASTSALEESNSS-----  
>CpCAV\_JN989420

-----MPQTKKPSSSFRLQTKYVFLTYPRCSSD-  
AESLRDFLWEKL-SRFAIFFIAVATELHQ-----DGTPHLHCLLQLDKRSNIRDPSFFD-----FQGNHPNIQPAK-  
NSEQVLDYISKD----GSVITRGDFRK--H-----KVSPTKSD-  
D----RWRTIIQTATTKEDYLEMIKTEFPHEWATKLOWLEYSANKLFPDIEPPYSSPFNE--FLQCDEEITE-  
WLNRLD---Y--QEPE-----QLQ-----HRRRSLYICGPTRTGKTTWARSLGR--HNYFNG-GIDFT--  
TYD-PNATFNIIIDDIP--FKF--CPNWKQLVGSQKDFTVNPKYGKKRV-KGGIPTIILVNND--  
DWIKDMSSSQNEYF--ESNCLIHYMTEGETFI---AARRQVTRASPPSENI-----  
>CpCV\_GU256530

-----MPSSSKRQNNFRLQTKYVFLTYPHCSST-  
ATSLRDFLWEKL-SRFAIFFIAVATELHQ-----DGTPHLHCLLQLDKRGDIRDPSFFD-----FEGNHPNIQPAK-  
NSEQVLDYISKD----GNVITRGDFRK--H-----KVSPTKHD-  
E----RWRTIIQTATTKEEYLRMIRDQFPHEWATKLOWLEYSANKLFPDIEPPYENPFSP--DLQCHEEIQE-  
WLNRLD---Y--VEPE-----QLQ-----HRRNSLYICGPTRTGKTSWARSLGR--HNYFNG-GVDFT--  
TYD-INATYNIIDDIP--FKF--CPNWKQLVGSQKDFTVNPKYGKKRI-KGGIPCIILVNND--  
DWLLDMSSSQKEYF--ESNCKIHYMYSGETFI---APESSSH-----  
>CpRV\_GU256532

-----MPRLNKKTSNFRFQSKYVFLTYPHCNSN-  
PEALRDYLWEKL-TRFIIFFIAVASEVHQ-----DGSPHLHCLLIQLTNKPNISDASFFD-----FEGNHPNIQPAR-  
NSEQVLDYISKD----GNIITKGEFCK--H-----RVSPTKHD-  
E----RWRTIINTATSKEHYLGMIRDQFPHEWASKLOWFEYSANKLFPDVEPPYQSPFPEA--SLQCHEEIQD-  
WLNRLD---Y--LEPE-----QLR-----HRRKSLYICGPTRTGKTSWARSLGR--HNYFNG-GVDFT--  
TYD-EQAAYNIIDDIP--FKF--CPNWKQLVGSQKDFTVNPKYGKKRI-KGGVPCIIILVNND--  
DWMKDMSSHQKEYF--QHNCMIHYMDEGETFI---APVSSSH-----  
>CpYDV\_KM377674

-----MPSRTNNSFSLQTKYVFLTYPHSSST-  
AENLSDFLWSKL-TSLAIFFAIATELHQ-----DGSPHLHCLMQLDKSCDMRDPSFFD-----FEGNHPNIQPAK-  
NSKQVLEYMSKD----GNIITSGDFSN--H-----RVSPTKSD-  
E----RWSTIMQTATSKEEYLEMIKQEFPHWATKLHWLEYSASKLFPDMEPPYQSPFPE--FLHCHEEITE-  
WLNSDL---Y--VEPE-----QLQ-----LRRSLYICGPSRTGKTSWASSLGS--HNYFNG-GVDFT--  
TYD-VNATYNIIDDIP--FKF--CPNWKQLVGSQKDFTVNPKYGKKSV-KGGIPCIMMVNND--  
DWLESMSDSQSEYF--YLNCKIHYMSEGETFI---ASAASSH\*-----  
>CpYV\_JN989439

-----MPSPSKKSPSFRLQTKYVFLTYPHCSSS-  
AEGLRDFLWDLK-SRFAIFFIAIATELLP-----AHLHCLLQLDKRSNIRDPSFFD-----FEGNHPNIQPAK-  
NSEQVLDYISKD----ENVITKGEFRK--H-----KVSPTKTD-  
E----RWRNIINTATSKEEYLGMIKEEFPHEWATKLOWLEYSANKLFPDIEPPYQSPFTSC--SLQCHEKITD-  
WLNRLD---Y--LEPE-----QLR-----HRRRSLYICGPTRTGKTSWARSLGL--HNYFNG-GVDFT--  
TYN-PLATYNIIDDIP--FKF--CPNWKQLIGSQKDFTVNPKYGKKRI-KGGIPCIILVNND--  
DWMNDMSPAQNDFY--QANCCIHYMEEGETFI---ALQSSSH-----  
>CSMV\_M20021

-----MSSLPVSESEGEVSGTQVPSRGGQVTPG---EKAFLSLRTKHVFLTYPRCPIS-  
PEEAGQKIADRL-KNKKCNIIYISREFHA-----DGEPHLHAFVQLEANFRRTTSPKYFD-----LDEFHPNIQAAR-  
QPASTLKCYMKH---PESSWFEFGKFLKPKVNRS-----PTQASARD-  
K---TMKQIMANATSRDEYLSMVRKSFPEWAVRLOQFQYSANALFPDPPQTYSPYASR--DMSDHPVIGE-  
WLOQEL---Y--TVWS-----PG-----VRRRSLYICGPTRTGKTSWARSLGT--HHYWQH-SVNFL-  
EENW-CQAQFNIIIDDIP--FKF--VPCWKGLVGSQYDLTVNPKYGKKRI-PNGIPCIILVNEDE--  
DWLQSMSTQQVDFW--HGNVAVYHLLPGETFI---PSE-----  
>DCSMV\_JQ948091

-----MAPPVSDTESAN-----SANCRLAER--APGAA---EASFEVRAKNIFLTYSKCLLD-  
PQEALRDITHKL-RKFEPTYVYVARELHQ-----DGTFHLHCFVQCKKHVRTTRARFFD-----LEEYHPNVQONAR-  
MPHKVLAYCKKS---PVSYAEEGAYTESDVRKRK-----IDASTTKD-  
A----KMADIIRSSKSKEEYLSMVRKTFPFDWATRLQNFYSAERLFPSTPPPYVSPFNMP--SQEEHPVLGA-  
WLRALD---Y--TGRN-----PA-----ERRKSLYICGPSTGKTTWARSLGK--HNYWQH-SVDFL--  
NII-PDAEYNIIDDIP--FKF--VPCWKGLVGAQRDITVNPYKGGKRL--SNGVPCIIILANEDE--  
DWLQMQPQADWF--NANCEVHYMYQGETFF---KSLGAATA-----

>DDSMV\_HM122238

-----MSSQLVSDSVMFDPRSYGEYPSSESAASLPLSFNVRSQHVFLTYPRCPIP-  
PKDAGSFLKCLC-KRYNIQYMYIAQELHQ-----DGEPHLHAFLOFDKVFRTTSAKYFD-----FFEHPNIOAAR-  
NPEKTLEYCQKN---PADFYEDGVFVK--PKASRKR-----KLASFTRD-  
K---KMKQIMANATSRDEYLSMIRKAFPFDWAIRLQOFEYSAKALFPEAPIQYQPFVSN--DMSDHPVIGE-  
WLDTEF---F--TERG-----PH-----HRRRSLYICGPTRTGKTSWARSLGT--HHYWQH-SVDFL-  
TEWN-KNAIYNVIDDIP--FKF--VPCWKGLVGSQFDITVNPKYGKKKI--PNGIPSIILANEDE--  
DWLQTMSPQOQADWF--HGNCVVYYLQAGESFI---PPSSDVEA-----  
>DfasMV\_JX458740

-----MSSSSAQSGPSHFRIRAQNIFLTYPRCDLD-  
PKDAGEIIQSKM-QSHEPKYILFSRELHS-----DGEYHLHGLLQLSRQFSSNNPRIFD-----IGAHHPNIOQSAI-  
SPKSVRDYILKN---PITQFCIGTYVPAKKGRKLS-----RFEENIRN-  
N---IMRSIISTATSKESYLSMVRKSFPEWATKLSQFEYSASKLFPEVTPEYKSPFPTE--SLICNENIQD-  
WVDNTL---Y---QP-----NRT-----SRGLSLYICGPTRTGKTSWARSLGV--HNYWQN-NIDFS--  
VYN-DNATYNVIDDIP--FKF--CPCWKALAGSQSDFTVNPKYGGKKRI-KGGIPCIILVNEDE--  
DWLTCMSSSQKTYF--ESNVVIYYMYAGEKFF---NFVEE-----  
>DoYMV\_AM157413

-----MR---TPGFRISARNIFLTYPKCSLS-  
KEQALEQLCRIE-CPSDKLFIQVQEAHQ-----DGTMLHALVQFKGKAQFRNARHFDL-THPHSTQIFHGNVQGA-  
SSSDVKSQYITKD---GDYVDWGTFOI--DGRPA-----RGGROTAD-  
D---AVASALN-SGTVQGANIIKELLPHNYVFQYHNLRSLNERIFAPPITVYTSFYKPT-DFSQVPSVMTD-  
WAESNVDPDSWRSDPA-----ARP-----RRPMSIVVEGATRTGKTLWARSLGA--HNYMCG-  
HLDLSPKIFS-NDAWYNVIDDIP--PHY--LKHFKEFMGAQMDWQSNIKYKPTQI-  
KGGIPTIFLCNPGPRSSYKEFLDEEQNESLKEWAYKNAVFVTLEQPLF---STEHQGTASTGEEAQNDSA-----  
>DSV\_M23022

-----MAA---NRSFRHRNANTFLTYSKDHS-  
PQLIADHLWDL-LSWNPYIYLVAHEHA-----DGLSHALVQTEKQVNTTNQRFDD-----ILEFHPNIOQSAK-  
SVNKVRTYILKN---PVEKFERGTFVP--RKSPFLGESS-----SEKKHND-  
D---VMRDIIDHATSKEEYLSMVQKALPYDWATKLSYFEYSADRLFVVEAAPFINPHPPSEPDLQCETITD-  
WLQNDL---F--QVVT-----DG-----VRKRSYILGPTRTGKSTWARGLGR--HNYWQN-NVDWA--  
SYD-EEAQFNVIDDIP--FKF--CPCWKQLIGCQKEYVVNPKYGGKKRVASKSIPSIILTNPDE--  
DWMKDMTPAQLSYF--EANTVIYKMTEGERFF---SYAEGPATASLASLDDAPA-----  
>EcmlV\_HF921459

-----MPROP---NSTFRLQKSIIFLTYPKCPLL-  
PIFLIDYLYQLL-NNFNPTYGRVCTEDHQ-----DGEPHLHCLVQMDKRFNTTNQRFDDI-KDPNGVATYHPNCQVPR-  
RDADVADYIAGK---GQFDERGILRA--SR-----RSPKKTRD-  
T---IWAAIITESTSKSEFLARVQHEQPYVWATQLRNLEYAANSKWPEPITVFEPYVNVN---FPRIPEPIQQ-  
WAETNL---FTVSAHAIQL---LKP-----DRPITLIEGPKTGTAWARSLGR--HNYCG-GVDFS--  
NYD-VFALYNVIDDIP--FOY--LPCKKELGCKQKDFTVNEKYRKKTRI-KGGIPTIILCNPDQ--SYRIALANSEMYE-  
--WSTHNVLHIEIKNPFY-----  
>ECSV\_FJ665632

-----MASS---SHRFRIQGRAFFLTYSQPRE-  
PKDVGEFLTSHSTLASHVVYVRVQEQKHQ-----DGNHLHAIVCTSERDIRDPRIFD-----FGEFHPKIETCR-  
SVSKSLKYIQKE---AGSFYEHGTVPC--DKRLTG-----RKRKAEQD-  
E---WWHQAVN-SGSIEEALQLVKDNEPRTFWLQHHNLVTNARRIWSEVRAEFVPKYSES-SFS-VPRVLS-  
WVANNL-----RAD-----PLP-----DRPLSLIEGDSRTGKTAWARSLGR--HNYLSG-  
HLDLNGAVFD-NEASYNVIDDVN--PKY--LKHWFKFIGAQKDWQSNLKYGKPVLV-KGGKPAIVLCSNDQ--  
SYKSFLDCEENHQLRSWTSKNALFVDIQDALFGGVSMTMREQTREDDPESPMWASDSDPGDQAV  
>EMSV\_JF508490

-----MSQDQDTLGSSD---GSRFRISKQLFLTYPRCDLS-  
PKDLGLELLQLL-IQNKPKYIHVTQELHK-----DGPHLHALVQLEKKLFTRRQTFDDQFLH---GTFHPNIOQPAR-  
DASKVLGYITKQ---NGEYIFGKPTL--PKK-----KTAQEGRD-  
Q---RMRAIIESSTSKQYLSMVRKEFPFDWATRLMQFEYSASSLFPEPPVEYTSFPFVD--QLLCPEDITE-  
IINSEW---F--QHGA-----PG-----GRPRSIYICGPTRTGKTTWARSLGR--HNYNS-VLDFT--  
HYD-PQAEYNVIDDIP--FKY--CPQWKALVGAQRDYIVNPKYGGKKKI-KGGIPSIILTNDDE--  
DWLGEMKPAQAEYL--HANSHVHYMYEGTKFY---KAEAAGQDV-----  
>ESV\_EU244915

-----MSSIASTVPSAP---TRRFKHRNVNTFLTYPHCTLE-  
PEVVGLVLSLL-ESWTPAYIVVSREAHQ-----DGSWHLHALAQSVKPVYTHDERFFD-----IEDYHPNIOQAAK-  
SANKVRDYVLKN---PLKVWERGTIFP--RKKTFGLSTSEG-----NTTKQSKD-

D----IVRDIIEHSTSKQEYLSMIQKALPYEWATKLOYFEYSANRLFPEIQETYTNPHPPTAPQLQDGETIQS-  
WVYTNI---Y--QNIP-----G-----TRKQSLYLILGPTRTGKSTWARSLGR--HNYWQN-NVDWT--  
SYD-EDAVFNIIDDIP--FKF--CPCWKQLIGCQKDYIVNPKYGKRKKVAKKS IPTIVLANVDE--  
DWLKDMTPAQODYF--NANCTVYILEPGERFF---GGPAVSATAHPSIEV-----  
>FbSLCV\_JX094280  
-----MPPRN---NNSFRLQKSIIFLTYPKCPLT-  
PLFVIDYLYQLL-KNFNPIYARVCTENHQ-----DGEPHLHCLVQLDKRFNTTSQRYFDI-SDPNRTGVYHPNCQVPR-  
RDADVADYIAGK----GQFEERGILRA--SR-----RSPKKS RD-  
S----IWTNIINESTSKSEFLGRVQIEQPYVWATQLRNLEYAANSKWPEQPSVYIPKWTV---FNNVPEPIRE-  
WADTNL-----FTVSLQSMQFPTKTGKTAWARSMGL--HNYFCG-GVDFS--  
VWN-NFAIYTVIDDIP--FOF--LPCKKELLCQKDFTVNEKYRKKCRI-----PTIVLCNPDQ--SYKAALMGSEMYE-  
--WLSLNVIHVEIKDPFF-----  
>GCFaV\_JQ901105  
-----MAS---SSSFNLRSKNFFLTYPCPVH-  
KQFALDFFKSKF-HK-TLDYALIGEELHQ-----NGEPHLHALLIFKKRQAIRNPKHFD---ITISSHSYHPNITKPR-  
DVADVLNLYVGKE----GDTVEHGTKPT--L-----KSKKQSRE-  
L----DFGEFLRVANSKDEFLQLVKQHYPYQYVLNLQRLEYFVAQTWPPTPTPHANQWTA---WNNLPPEIHL-  
WVQNEL---Y--VEAT-----H-----RRRKS LVIIEGPKTGKTQWAMSLGI--HNYWCE-SVDFS--  
LYI-DDALYNIIDDIP--FOY--LPCKKALLGCQFNYIANEKYRPKRKI-KGGIPSIIVLCNPDN--  
SYDAITNWHATFKP-WAENIIFVKIDRPLY-----  
>HrCTV\_U49907  
-----MPRQ---PNSFRIQARNIFLTYPQCTIP-  
KDEMLQLLQNLNWTVVKPTYIRVAAERHA-----DGTPHLHCLIQLSGKSNIKDCRFFDI-THPQRSTSFHPNVQSAK-  
DTNAVKNYITKE----GDYCESGQYKV--SG-----GKANKD-  
A---VYHNAVN-AGGVREALDIKAGDPKTFVTQHNNVKANLEHIFAKPPEPWNPPYPLS-SFTNVPEEMQE-  
WADDYF-----GRPV-----ADS-----HKAKSIIIEGNSRTGKTCWARALGT--HNYLCG-  
HLDFNMRVYS-NEVEYNVIDDVA--PTYLKMHWKELIGAQRDWQSNCKYKPVQI-  
RGGVPTIILCNPGESSFRDFLDKPENDGLRQWTLYNAIFIFLDTPLF---DNGIH-----  
>HYVV\_AB236325  
-----MAP---PKRFKINSKNYFLTYPHCSLT-  
KEEALSQIQALE-TPTNKLFIRICRELHE-----DGSPHLHVLIQFEGKYQCTNQRFFDL-VSPRSASHFHPNIQGAK-  
SSSDVKAYMEKD----GDVIDFGVFQV--DGRSA-----RGGQOSAN-  
D----AYAEAIN-SGSKSSALSILREKAPKDFVLQFHNLSNLDRI FAPPLEEFVSPFSSS-SFDQVPDELEE-  
WAAENV-----RDSA-----ARP-----WRPMSIVIEGDSRTGKTMWARSLSP-RHNYLCG-  
HLDLSPKVYS-NEAWYNVIDDVA--PHY--LKHFKEFMGAQRDWQSNCKYKPIQI-  
KGGIPTIFLCNPGPTSSYTEYLDEEKNAALKAWAIKNATFVTLYGPLY---SGTHQATQIREEESTSPEEN-----  
>MaMPRV\_AY044133  
-----MPP---PKRFRVSSKNYFLTYPRCSIS-  
KEETLSQLLNIQ-TPTDKKYIKICEELHE-----DGQPHLHVLIQFEGKFVCTNQRFLDL-VSPTRSTHFHPNIQGVK-  
SSSDVKAYIDKD----GVTIEWGQFOI--DGRSA-----RGGQOSAN-  
D----SYAKALN-ADCIEAAMTVLKEEQPKDFVQYHNIRSNLEKIFTPPEPWPVPPFQLS-TFNNVPLIMSD-  
WVNIENI-----SDSA-----ARP-----LRPISIIIEGPKTGKTIWARSLGP--HNYLCG-  
HIDLNPRIYS-NHAWYNVIDDVA--PHY--LKHFKEFMGAQRDWQSNCKYKPIQI-  
KGGIPTIFLCNPGPHSSYKEYLSEEKNSLNDWAQKNAIYVSIIEPLY---STFNQTASSSRQETDST-----  
>MiSC\_D00800  
-----MRAPASSAASNRPGPSN---HPTPRWNSKQFFLTYPHCNLT-  
PSELMKELFSRL-TEKIPGYIKVSQEFHK-----DGDPHLHVLIQNLTKLCTRNPKFFD-----VQGFHPNIQPV-  
DAEKVFGYISKT---NGDSDMELGELQL--RNK-----KPEKPTRD-  
Q---RMAMI IASSTNRNEYLSMVRKEFPFDWAI RLOQFEYSAAALFTEPPPVYQSPYPNE--QIVCPPELVD-  
IIDQEW-----NQP-----NGP-----RRPRSIYICGSPRTGKTTWARNIGR--HNYNS-TVDFT--  
HYD-KDAIYNVIDDVA--FKF--LPQWKALVGAQRDYIVNPKYGKKKKI-PGGIPSIILTNDE--  
DWIKDMKPAQVEYL--HANAHVHYMYEGQKFY--ALPAEE-----  
>MSRV\_JQ624879  
MSAFGNHFVHMPSVQAGVFNPMPSGSDYPSEEEDLHQONTVPVGPDP--RRNFQFKSANAF LTYPRCLLT-  
PFEAGQHLWEVA-RHWTPSYVLASSESHQ-----DGTPHLHVLLQTM RMPMSTRDPSFFD-----IQGYHPNIQASR-  
SPNKTREYILKS---PITVYSRGT FIP--RAGTSGAGYG-----STPVPKRN-  
E----IMRGI IETT NKA EYLSEVQKAFPFEWATKLOQFEYSAERLFTLPSPFVPPHPPSEPDLHCYETIRS-  
WKDENI---FQ-GDAA-----SRT-----SRPRSLYIVGPTRTGKTTWARSIDPVNHNWQN-GVDFL--  
KYR-KSAKYNVLDIP--FKF--CPCWKQLVGGQKDYTVNPKYARRMEV-PGGIPSIILVNYDE--  
DWLKVMTPAQLEYF--YDNCVVYQOMELHEKFY---TPS-----

>MSV\_AF329881

-----MASSSS---NRQFSHRNANTFLTYPKCPEN-  
PEIACQMIWELV-VRWIPKYILCAREAHK-----DGSLHLHALLQTEKPVRISSDRFFD-----INGFHPNIQSAK-  
SVNRVRDYILKE---PLAVFERGTFIP--RKSPFLGKSDSEV-----KEKKPSKD-  
E---IMRDIISHATSKEEYLSMIQKELPFDWSTKLQYFEYSANKLFPFIQEEFTNPHPPSSPDLLCNESIND-  
WLQPNI---F--QSSD-----ER-----SRKQSLYIVGPTRTGKSTWARSLGV--HNYWQN-NVDWS--  
SYN-EDAIYNIVDDIP--FKF--CPCWKQLVGCQRDFIVNPKYGKKKKVQKSKPTIILANSDE--  
DWMKEMTPGQLEYF--EANCVIYIMSPGEKWY---SPELPPTEAVHSDRS-----

>ODV\_AM296025

-----MATVASSSTRFRVYSKYLFLTYPCILE-  
POYALDSLRSLL-QYKPLYICSVRERHE-----DNSPHLHVLVQCEKRASITNPNALNLRMDLSPFTTYHPNIQPAN-  
NCNDVREYITKEVDSHEHTAEWGTFIH--HT-----TSGRPKD-  
E---AMKQIIESATSKEEFISMVRSRFPFEWSINLQRFQYTANYLFPDPIPOYTPEFPTE--SLICHETIQN-  
WANTEL---F--TVR-----RHRSLYICGPTRTGKSTWARSLGI--HNYNS-QVDFT--  
NYN-ADALYNIIDDIP--IKY--VPNWKCFLGAQKDFTVNPKYGKKKI--RGGIPCIVLVNPD-  
DWLKDMTPLQSDYL--YANAEIHMEDGETFI---NHSFTFEGEGATASQ-----

>PanSV-A\_L39638

-----MSTSLSITSDGRHS---VRSFRHRNANTFLTYSKCPLE-  
PEFIGEHLFRLT-KDFEPAYILVRETHQ-----DGTWHCHALLQCIKPVTRDERYFD-----IDRYHPNIQSAK-  
STDKVREYILKD---PKDKWEKGTYP--RKKSFPVPGKEN-----SEKKPSKD-  
E---VMKEIMTHATSRAEYLSLVQTSPLPYDWATKLSYFEYSASRLFPDIAEPYSNPHPATDPDLLCNETLQD-  
WLEPNI---Y--QIIP-----G-----ARKRSLYIVGPTRTGKSTWARSLGR--HNYWQN-NIDWS--  
SYD-EEAAYNVVDDIP--FKF--CPCWKQLVGCQKDYIVNPKYGKRRKVASKSIPTIILANEDE--  
DWLKDMTPAQDYF--YANCEIYVMQAGEKWF---TPA-----

>PDSMV\_JQ948087

-----MASHVSETEGAR--GOVGAPPLQEGEEVGAPGAV---EACFEVRSRNVFLTYSRCHLE-  
PSFMLERLSRLL-KKWDPTYSYVAREEHK-----DGSYHLHCLVQCRKYIRTKSAKFFD-----VEEFHPNVQONAR-  
VPHKVLAYIRKG---PVCFVEHGAFKDEAKEKKK-----ADAPSTKD-  
A---KMASIISQSTSREDYLGVMVKEFPFDWATRLQOFEYSAQALFPCLPPYVDPFGMP--SQAEHQVLGA-  
WLREEL---Y--SDRS-----PA-----ERRRSLYICGPTRTGKTTWARSLGC--HNYWQH-SVDFL--  
HVI-PTARYNIIDDIP--FKF--VPCWKGLVGAQREITVNPKYGKKRLL--PNGIPCIILVNEDE--  
DWPQQMQPSQAQAWF--EDNCVVFYMNQGFRRF---ETTA-----

>PSMV\_JF905486

-----MSSLVSETSNSEVGSQMESPGRGGQSIDAPS---SSCFKVRARNLFLTYSKCNLT-  
AVFLLEYISSLL-KKYCPTYIYVAQEAHK-----DGSYHLHCLVQCRKYIRTKSAKFFD-----IKEFHPNVQONPR-  
MPKKALSYCKKS---PISEAEYGVFOEIKRPRKKK-----ADAPSTKD-  
A---KMAEIIKSSSTNKEDYLSMVRKSFPPDWATRLQOQFQSAESLFPSTPPPYVDPFGMP--SQDTHPVIGA-  
WLRDEL---Y--TDRS-----PT-----ERRRSLYICGPTRTGKSTWARSLGS--HNYWQH-SVDFL--  
HVI-QNARYNVIDDIP--FKF--VPCWKGLVGSQKDITVNPKYGKKRLL--SNGIPCIILVNEDE--  
DWLQMQPSQADWF--NANAVVHYMYSGESFF---EAL-----

>SacSV\_Q0273988

-----MAYANSTSTESNS---SRSFRHRNANTFLTYSKCSLD-  
PEILGLSLWSKL-APWTPAYILVAREAHQ-----DGTWHCHALAQSVRPVTTSDPRFFD-----VNEYHPNIQSAK-  
SVDRVREYILKD---PLCQWEKGTVP--RKKPFVPOIGES-----SNTRASKD-  
D---IVRDIIOHSTNKHEYL SMLQKELPYEWATKLQYFEYSANKLFPFIAEPTYNPHPPPTQPDLCYERIEE-  
WLNFN---Y--QQPQ-----EA-----GRARSLYIVGPTRTGKSTWARSLGR--HNYWQN-NVDWS--  
SYD-EEAVLNVIDDIP--FKY--CPCWKQLVGCQKNYVVNPKYGKKKKVAKRSIPAVILANEDE--  
DWLRDMTPAQRDYM--EANCEVYIMSSGEKWF---TPA-----

>SCTAV\_HQ443515

-----MARTPSRNRPNQNG---  
PGYFRFQKKNFLTYSQIGGDFKDYIFEKLLALL-  
QQFEVLFLSVALEHHQPTESNPEGGFHTHCIFQCNKKLQVNGNLFFNI-I-LPDGRTIHPRIDGLN-APKRAWYITKE-  
--DQQPRCFGELRL--AGRSPN-----RLGDSNLE-----  
WRRILDSSNTKDEFFNIRESCPTDFVLRWPSILAFANYHFRPVVQPYLPRWTE---FTRLPDQIKE-WAEHNI---  
YFVSSHCLNYELYNRP-----VRPRSLYICGPSRTGKTQWARSLGR--HHYMSGMVLWDWS--  
NYDIEHTTYHVIDDIR--YMKIQOELFKSIIICNEDYSVWIKHKPNLII-PGGRPCIAITNPDM--  
DWIPCMSDAMKDFW--HANCEVYILSSDEVVY---STE-----

>SMaV\_KF806701

-----MSFSSDSADGGIPNERSIHP---GSNFRFDASEIFLTYPRCPVD-  
PMDVGNYLWTML-LTLSPKYVLCTRERHA-----DGSFHLHAFVQLGYNLITANPHFD-----YKQYHPNVQPV-  
R-----

SSKSVRDYCLKN---PISQYSRGRYTVVGRGIRNGNSS-----  
RVGESSSDWESKNAKMATIFATATDRASYLGMIKTTFPFEWATKLOAFEYSASKLFPVEVEPEYETPNWAV--  
SLRCPEAIAD-WANHNV---F--QOPN-----DG-----TRRKSLYICGPTRTGKTTWARSLGT--  
HNYNN-NIDFT--NYR-DRAFYNVIDDIP--FKF--CPCWKSIVGQKDYIVNPKYGKKKKI-AGGIPSIIVNEDD--  
DWLPKMTAAQRSYF--EANCEVHYLYEGDSF-----  
>SPLCV\_AF104036

-----MAP---PKRFKIQAKNYFITYPRCSLS-  
KEDCLAQLLNIO-TPSNKKYIHVARELHE-----DGEPHLHLVQFEGKFVCTNSRFFDL-VSPNRSNHFPNIQGAK-  
SSSDVKSIVDKD---GDTITWGEFQV--DGRSA-----RGGQQTAN-  
D---AAAEALN-AGSKEAALQIIREKLPEKYLQFHNLVSNLDRIFSPPPSVYSSPFSSS-SFNAVDPDIISD-  
WAAENV-----MDSA-----ARP-----DRPISIVIEGPSRIGKTVWARSLGP--HNYLCG-  
HLDLSPKVYS-NSAWYNVIDDVN--POY--LKHFKEFMGAQKDWQSNCKYGKPVRI-  
KGGIPTIFLCNPGEGSSFKLWLDKPEOGALKNWATANAI FCDVQSPFWVQEEVSHSGATAHRGEEGQEES-----  
>SpSCTAV\_GU734126

-----MPRQ---NKSFRLLSSKNIFLTYPCDIP-  
KDEVLQLLQNLPSVVKPTYIRVASERHA-----DGTPHLHLCLIQLSGKSNIKDCRFFDI-THPRRSANYHPNVQAAK-  
DANAVHNYITKE---GDYCESGQYKV--SG-----SSKANKD-  
D---VYHNAVN-SGGVKEALEI IKAGDPKTFVIQHNLVLANLERIFKPKQETWTPPFPLS-SFNVPDEMQE-  
WADNYF---G--QPIE-----SRP-----IRPKSLIIEGDSRTGKTCWARSLGK--HNYLSG-  
HLDFNPRVYS-NEVEYNVIDDIA--PSYLKHKHWKELIGAQHDWQSNCKYGKPVQI-  
KGGIPSIILCNPGEGSSFKDFLDKDNESLKRWTLYNAVVISISEPLY---NKDD-----  
>SSEV\_AF239159

-----MTTVGSAESGSA---IRSFKHRNVNTFLTYPKCHLE-  
PEAVGLHLWLSLI-GHWNPAYIVVSREAHA-----DGSWHIHALAQSVKPVQTTNPRFFD-----IEDFHPNIQSAK-  
SADRVKEYVLKN---PIKQWEKGT FIP--RKKS FATTSSD-----RQPKPTKD-  
D---IVRDIIEHSTSKQEYLSMIQKALPYEWATKLOQFEYSASRLFPETAEVYTNPHPTPEPDLINFETIED-  
WLNPNI---Y--QNIP-----G-----HRKQSLYILGPTRTGKSTWARSLGR--HNYWQN-NVDWS--  
SYD-EEAVYNIIDDIP--FKF--CPCWKQLVGCQKEYVVNPKYGKKKKVASKSIPSIILANEDE--  
DWLTVMTPGQREYF--EANA VIYIMTAGEK FY---KPA-----  
>SshADV-1\_GQ365709

-----AECIIIGREHHE-----  
MTFDFHAKYVLLTYAQCGELDAFRVMDKLSLLG-----  
DGGTHLHCFAEFGRKFRSRKADVFD-----VDGHPNITKSRGTPEKGYDYAIKD---GDVICGGLGRP--SVG---  
-----RVGTRPSD-S---KWAITS-  
ASNRDEFWELVHELDPKAAATSFSQ LORYCDWKYQYHAP EYESPAGAH--FIGAELDGRNRWLEQSG---I--GSSE---  
---ERR-----GRVKS LVLVYGPSQTGKTSWARSLGK--HIYCVG-LVSGTECLKA-  
PDVEYAVFDDIRGGIKF--FHSFKEWLGCQPHLSVKELYREPKVI--EWGKPSIWCSNADP---RNELLQVDID---  
WMEMNCTFIEITEPVV---EFN-----  
>SSMV\_1\_JQ948051

-----MSGPSRPPSPFAISSSDEES---VDGFHFRGKNIFLTYSRCEID-  
PALITDALWDFK-SSHKPLYILSVRELHQ-----DSGFHVHCLVQLTDQYRSRDSFFAD-----LGGNHPNIQTVR-  
SATKVKEYILKE---PVSQSARGKFVA--PGGRPPKHTDRR-----RSDSAVKD-  
E---RMRYILRTATRDDYLGMRKSPFEWATRLAQFEYSASKLFPDITPQYQSQYQTT--DLTCHENLLD-  
WYQENL-----QCYI-----DGA-----GRRKSLYICGPTRTGKKSARVLGR--HNYNM-QVDWA--  
TYD-QEAQYNVIDDIP--FKF--CPHWKALIGCQKDFTVNPKYGKKLI-KGGIPTIILVNEDE--  
DWLADMTPGQVSYF--EANVQIHYMTSEESFI---PDPALRQRLSLNYKVCFFLM-----  
>SSMV\_2\_JQ948052

-----MSSQSNSTEAS---PANFRFRARS AFLTYPKCTLE-  
PRDVVEHLYSKF-RKYGPKYCLV TREHHS-----DG DYHLHLCLFQLDKAFSTNDSSTFN-----ILDYHPNIQTAK-  
SPTNVRDYCLKN---PVS KAERGTFIPL-KGRTPK-----NTESKAKD-  
S---VMRSIINTSTDRASYLSMVRKAFPFDWATKLOQFEYSASKLFPDVIPEYTSFPFTE--NLMCNERITD-  
WLDNTL---Y--SADH-----PR-----TRKSGLYICGNRTGKTSWARSLGK--HNYWQM-NL DFA--  
NYN-NEAQYNVIDDIP--FKF--CPYWKALVGSQHEYTVNPKYGKKLI-KGGIPSIILVNEDE--  
DWMRAMNDGORSYF--EGNMSIYYMSEGESFI---RNEAL-----  
>SSRV\_AF072672

-----MPSQEDSTVASRPFKHRNANTFLTYSRCLD-  
PEAVGLLILWQLI-SHWSPAYILVSREAHA-----DGEWHLHALVQSVRPVQTTNQGFFD-----IESFHPNIQSAK-  
SANKVREYILKN---PIAKWEKGT FIP--RKQCFVSSSES-----KNSKPSKD-  
D---IVRDIIEHSTSKEEYLSMLQKALPYDWATKLOQFEYSASKLFPDVTVEEYTS PHPTTTPLLRDPTTIDN-  
WVQPNL---F--QNNT-----G-----TRKLSLYILGPTRTGKSTWARSLGR--HNYWQN-NVDWS--



CYD-EDAVYNVIDDIP--FKF--CPCWKQLIGCQENYVVNPKYGKKRRVAKKSISTIVLANEDE--  
DWMKVMSPGQLDYF--HQNCVVYIMEEGERFF---GGPAVSATAHPPIGV-----  
>SSV\_M82918  
-----MSTVGSTVSSTP---SRRFKHRNVNTFLTYSRCPLE-  
PEAVGLHIWSLI-AHWTPVYVLSVRETHE-----DGGYHIHVLQAQSAKPVYTTDSGFFD-----IDGFHPNIOQSAK-  
SANKVRAYAMKN---PVTYWERGTFFIP--RKTSFLGDSTEP-----NSKKQSKD-  
D----IVRDIIEHSTNKQEYLSMIQKALPYEWATKLOYFEYSANKLFPDIOEITYTSPFPQSTPALLDPTAINT-  
WLENNL---Y--QNSN-----S-----NRKLSLYILGPTRTGKSSWARSLGR--HNYWQN-NVDWS--  
SYD-EDAEYNIIDDIP--FKY--CPCWKQLIGCQKDYIVNPKYGKRRKVASKSIPTIVLANEDE--  
DWLRDMTPAQODYF--NANCETYMLEPGERFF---SLPAVSATAHPSSEV-----  
>SWSV\_KJ187749  
-----MSTDSSNOGMAAORLSPGVVEEFTTWPDPSS---AGSTSQ---PSVFQFKAQONIFLTYPSCDLP-  
VDVAARTLLTLC-HSFQPLYILCSQEHHA-----DGSNHLHILLQTDKTMYPTRNPHYFD-----IGGFHPNQPAK-  
SPDNVRAIYILKD---PITSFEEGSFQP--RGSSSNTSAMP--VGNSTGTRD-  
S----LMSDIINTSTKDDYLTRVSNTPFPDWATRLQOFEYSASKLFPPEVREYVNPFPSEPDLFCSEIIDS-  
WVYDELDMDF--TDAF-----DAA-----QRRRSLYIVGPTSTGKSTWASSLGR--HNYWQH-MVDFT--  
AYD-THAKYNMLDDVP--FKF--CPNWKQLVGCQSDYIVNPKYAKRKEI-PGGIPCMMMLQNPDD--  
DWLPVLSQMDYF--VNNCDVYVMKPGKFFGGDTPVPEAQEDGPGPSSS\*-----  
>TbYDV\_M81103  
-----MPSAPQKTKSFRLOTKYVFLTYPRCSSS-  
AENLRDFLWDKL-SRFAIFFIAIATELHQ-----DGTPLHLHCLIQLDKRSNIRDPSFFD-----LEGNHPNIOQPAK-  
NSEQVLEYISKD---GNVITKGEFCK--H-----RVSPSKSD-  
E---RWRTIIQTATSKEEYLDMIKDEFPHWATKLOWLEYSANKLFPPEIYQATFTEE--DLQCHEDLQL-  
WRDQHL---Y--HEPR-----RAG-----TRIPSLYICGSPRTGKTTWARSLGR--HNYWNG-TIDFT--  
VYD-DHATYNVIDDIP--FKF--VPLWKQLIGCQSDFTVNPYKGGKKKI-KGGVPCIILCNDDE--  
DWLKNMSPAQIEYF--EANCITHFMYAAETFF--APESSH-----  
>TCTV\_GU456689  
-----MPRT---PRQYRIHAKNIFLTYPHCHLT-  
KEDALLQLQAIQ-CPSTKKFIRICRERHD-----NGEPHLHVLIOFEGKIQLYNPRHFDL-RDGGSGRICHPNIOGAK-  
SSSDVKSYIEKD---GDYIDWGEFQI--DARSA-----RGGQQTAN-  
D---ACAEALN-SGTAEAAALAVIREKLPKDYIFQFHNLKPNLAAIFNPPPVGYPKYNHT-QFV-LTDDILD-  
WLESNF---F--LEES-----NSPAGPSKYKVIPSIDRPKSIIIEGPSRTGKTLWARSLGS--HNYITG-  
HLDFSTKVYN-DDVSYNVIDDIP--PHYLKMKHWHKHLIGAQKEWQTNLKYGKPRII-  
KGGIPSIILCNPGDGASYQNFLDKPENEALKSWSLQNSVFTTIEEPLF---NITSDQEVEDSTPTV-----  
>TGMV\_K02029  
-----MPSH---PKRFQINAKNYFLTYPQCSSL-  
KEESLSQLQALN-TPINKKFIKICRELHE-----DGPHLHVLIOFEGKYCCQNORFFDL-VSPTRSAHFHPNIOQAK-  
SSSDVKTYIDKD---GDTLVWGEFQV--DGRSA-----RGGCQTSN-  
D---AAAEALN-ASSKEEALQIIREKIPEKYLQFHNLNSNLDRIFDKTPPEWLPFFHVS-SFTNVPDEMRO-  
WAENYF---G--KSSA-----ARP-----ERPISIIIEGDSRTGKTMWARSLGP--HNYLSG-  
HLDLNSRVYS-NKVEYNVIDDIP--POYLKHKHWKELIGAQRDWQTNCKYGKPVQI-  
KGGIPSIIVLCNPGEGASYKVFLLDKEENTPLKNWTFHNAKFVFLNSPLY---QSSTQSS-----  
>TLCJV\_AB100304  
-----MAP---PKRFLINAKNYFLTYPQCSSL-  
KEEALSQLOLN-TPTNKFIKICRELHE-----DGSPHLHVLIOFEGKFKCQNNRFFDL-TSPTRSAHFHPNIOGAK-  
SSSDVKSYIDKD---GDTLEWGEFQV--DGRSA-----RGGQQTAN-  
D---TAAKALN-SGSAEAAALAIIREELPKDFIFQYHNIKANLDRIFTPRAEVFVCPFLSS-SFDQVPEELEC-  
WVSENV-----RDAA-----ARP-----WRPVSIVIEGESRTGKTMWARSLGP--HNYLCG-  
HLDLSPKVYS-NDAWYNVIDDIP--PHY--LKHFKEFMGAQRDWQSNKYGKPIQI-  
KGGIPTIFLCNPGPTSSYKEYLDEEKNSALKEWAIKNAEFVTLNSPLY---SGTNQSATQNSQEEASSQA-----  
>TLCNDV\_U1501  
-----MAS---PRFRVNAKNYFLTYPKCSLT-  
KEEALSQLOTL-TPTKKFIKICRELHE-----DGSPHIHVLIOFEGKFKCQNNRFFDL-VSPRSAHFHPNIOGAK-  
SASDVKNYIAKD---GDVLEWGVFQI--DGRSA-----RGGQQTAN-  
D---AYAQAIN-TGNKDALRVLKELAPKDYVLQFHNLNTNLDRIQPPSEVYVSPFSIS-SFDRVPADLVD-  
WVSSNV-----VCAA-----ARP-----FRPISIVIEGDSRTGKTMWARCLGP--HNYLCG-  
HLDLSPKVYS-NDAWYNVIDDIP--PHY--LKHFKEFMGAQRDCQSNKYGKPVMI-  
KGGIPTIFLCNKGPNSSYKEYLDEEKNAALKQWAIKNAVFITLLEPLY---SGRENIALPEEEEEHSQEAS-----  
>TLCV\_AY044137

-----MAP---PKRFKINAKNYFLTYPCSL-  
LSEALSQLOTL-TPVNKLYIKICRELHE-----NGEPHLHALVQFEGKYQCTNNRFFDL-ASPSRSTHFHPNIOGAK-  
SSSDVKSYIDKD----GDTIDWGEFQI--DGRSA-----RGGQOSAN-  
D----AYAAALN-AGSKSEALRIKELAPKDYILQFHNLNSNLDRIQFQEPAPYISPFLSS-SFNQVPEELEV-  
WVSENV-----MSSA-----ARP-----WRPNSIIIEGDSRTGKTMWARSLGP--HNYLCG-  
HLDLSPKVYS-NDAWYNVIDDVD--PHY--LKHFKEFMGAQRDQWQSNTKYGKPIQI-  
KGGIPTIFLCNPGPTSSYKEYLDEEKNISLKNWALKNATFVTLYEPLF---SSTNQGPQNSQETTNOA-----  
>TLCYV\_AJ512761

-----MAP---PKRFKIQAKNYFLTYPCSLN-  
KEEALSQLOALE-TPTNKYIKICRELHE-----DGSPHLHLVLIQFEGKYVCTNNRFFDL-VSPTRSAHFHPNIOGAK-  
SSSDVKSYIDKD----GDTLEWGEFQI--DGRSA-----RGGQOTAN-  
D----AYAQALN-SGSKSEALNVIKELAPKDFVLQFHNLNANLDRIFAPPLEVFGSPFLSFIWIKFPKNLKN-  
GAADNV-----RHAG-----ARP-----WRPISIVIEGESRTGKTMWARSLGP--HNYLCG-  
HLDLSPKVYS-NDAWYNVIDDVD--PHY--LKHFKEFMGAQRDQWQSNTKYGKPIQI-  
KGGIPTIFLCNPGPTSSYKEFLEEEKNALKWALKNAEFITLNSPLY---SGTNQSATQNSQEEASSQAES-----  
>TPCTV\_X84735

-----MPSN---PKRFQIAAKNYFLTYPCSL-  
KEEALDQLORLQ-TPTNKYIKVARELHE-----NGEPHLHLVLIQFEGKFNCNQRFFDL-VSPTRSTHFHPNIOGAK-  
SSSDVNSYVDKD----GDTIEWGEFQI--DARSA-----RGGQOTAN-  
D----ECAEALN-RSSKEEALQIIKEKLPKDFLFCYHNLVSNLDRIFTPAPTFFVPPFQLS-SFTNVPEDMQE-  
WADDYF---G--VSAA-----ARP-----MRYKSIIIEGESRTGKTMWARSLGP--HNYLSG-  
HLDFNSRVYS-NSALYNVIDDVT--PHYLKHKHWKELIGAQRDQWQSNTKYGKPVQI-  
KGGIPSIIVLCNPGGDTSFQDFLDKEENEALKDWTLYNAVFIKLTEPLY---DGTV-----  
>TSLCV\_AF130415

-----MPRN---PNLFRLAAKNIFLTYPCDIP-  
KDEAIEMLQNLPSVVKPTYIRVAREEHA-----DGFPHLHCLIQLSGKSNIKDARFFDL-THPRRSANFHPNAQA-  
DTNAVQNYITKE----GDYCESGOYKV--SG-----GTKSNKD-  
D----VYHNAV-ASAGEALDIIRAGDPKTFIVSYHNVKANIERLFOKAPEPWVPPFPLS-SFTNVPDEM-  
WADDYF---G--RDA-----ARP-----ERPISIIIEGESRTGKTMWARALGP--HNYLSG-  
HLDFNSRVYS-NEAEYNVIDDIT--POYLKMKHWKELIGAQRDQWQSNTKYGKPVQI-  
KGGIPSIIVLCNPGGASYSKFLEKEENKALKDWTLHNAKFI FLNSTLY---QA-----  
>TYLCCV\_AF311734

-----MAP---PNKFRINAKNYFLTYPHCSLT-  
KEEALSQIKTLE-TPVNKLFIRICRELHE-----DGSPHLHLVLIQFEGKFQCKNQRFFDL-TSPHRSANFHPNIOGAK-  
SSTDVKSMEKD----GDVLDHGWFQI--DGRSA-----RGGQOSAN-  
D----AYAEAIN-SGSKASALNIREKAPKDFVLQFHNLNSNLDRIFTPPIVEYISPFS-  
WAVDNV-----VSAA-----ARP-----LRPVSIVIEGDSRTGKTMWARSLGP--HNYLCG-  
HLDLSPKVYS-NDAWFNVIDDVD--PHY--LKHFKEFMGAQRDQWQSNTKYGKPVQI-  
KGGIPTIFLCNPGPNSSYKEYLEEEKNALRNWAVKNAIFVSLNGPLY---SGSYQATPNRQEDNQT-  
>TYLCSV\_X61153

-----MPR---SGRFSIKAKNYFLTYPKCDLT-  
KENALSQITNLQ-TPTNKLFIKICRELHE-----NGEPHLHILIQFEGKYNCTNQRFFDL-VSPTRSAHFHPNIOGAK-  
SSSDVKSYIDKD----GDVLEWGTQI--DGRSA-----RGGQOTAN-  
D----AYAKAIN-AGSKSQALDVIKELAPRDYVLHFNHNSNLDKVFQVPPAPYVSPFLSS-SFDQVPDELEH-  
WVSENV-----MDAA-----ARP-----WRPVSIVIEGDSRTGKTTWARSLGP--HNYLCG-  
HLDLSPKVYS-NNAWYNVIDDVD--PHY--LKHFKEFMGAQRDQWQSNTKYGKPIQI-  
KGGIPTIFLCNPGPQSSYKEYLDEEKNQALKNWATKNAIFVTIHQPLF---ADTNQNTTSHRQEEASEA-----  
>USV\_EU445697

-----MATVGSNSVASRSFKHRNANTYLTYPKCPLE-  
PEAIGLTLWLI-APWEPAYIIVCREAHQ-----DGTWHCHALAQSVKPVTRNSRFFD-----IEDHHPNIOGAK-  
SVDKVRAYILKD---PIALWERTFIP--RKKSFPVHOGDE-----HTPKPTKD-  
D----IVRDIIEHSTSKQEYLSRLQNELPYEWATKLOYFEYSANKLFPDIPEPYIHPHPQTEPELHCKETIDD-  
WLKPN---F--QQLP-----S-----DRKQSLYIVGPTRTGKSTWARSLGR--HNYWQN-NVDWT--  
SYD-EEAMYNIVDDIP--FKY--CPCWKQLIGCQKEYIVNPKYGRKKVASRSIPTIVLANEDE--  
DWLKDMPAQREYF--EANCVIYIMTPGEKWF---SPV-----  
>WDIV\_JQ361910

-----MSQTSANNSANPKAS---SSTFRYRSNNCFLTFPHCNSC-  
PYGMVQHFDLI-STWSPIYAVASVELHQ-----DGTPHLHALLQTRKQISTNDPHFFD-----FDGHPHIQAAK-  
NPTLCRDYILKG---PITFSEKGAIP--RGRNAGTSPR-----HSNKRSRD-  
D----IMKDIIENSTNKS DYLSKVRNFPYDWATKLYNFEYSASKLFPPEQPEYSNPHGQSVDPDLYCYETIQD-

WIDSNL---F--QDPS-----AG-----TRPKSLYIVGPTRTGKSTWARSLGR--HNYWQN-NVDFT--  
VYD-PEAAYNIIDDIP--FKF--CPCWKQLVAAQRDFTVNPKYGKKKLI-KGGIPSIILVNSDE--  
DWLKTMTPEQQEYF--EANSIIYMMEPTEKFF---GGAEIV-----  
>WDV\_X02869  
-----MASS---APRFRVYSKYLFLTYPECTLE-  
PQYALDSLRTLL-NKYEPLYIAAVRELHE-----DGSPHLHVLVQNKLRASITNPNALNLRMDTSPFSIFHPNIQAAK-  
DCNQVRDYITKEVDSVNTAEWGTFFVA--VS-----TPGRKDRD-  
A---DMKQIIESSSSREEFLSMVCNRFPFEWSIRLKDFEYTARHLFPDPVATYTPEFPTE--SLICHETIES-  
WKNEHL---Y-----SSP-----GRHKSIIYICGPTRTGKTSWARSLGT--HNYNS-LVDFT--  
TYD-VNAKYNIIIDDIP--FKF--TPNWKCFVGAQRDFTVNPKYGKRKVI-RGGIPCIILVNPDE--  
DWLKDMTPEQSDYM--YSNTVVHYMYEGETFI---NYSFASGEDVTASQ-----

# Full genome alignment

>ACMV\_J02057

```
-ACC-----GGTTGGCCCC-----
-----GCCCCCTTTA-----
ATGTGGTCCCCGCGCACTACTTATGTCCGC---CAATCAT-GATGTAG-----
-----CTTTAA-----AGGT--TATGTATTAGTGGTGGGC--
-----CACTAT-----ATACTTGCAGGCGAAGTT-----
GTGGCTAGTGCGCAATGTGGGATCCACTGGTGAATGAGTTTCCAGAC-----
TCGGTGCATGGGCTTAGGTGTATG---CTGGCAATTAATA-----TTTGCAG-----
GCCTTAGAGGATACATACGAGCC-----CAGTACGTTGGGCCA-----CGAACTGGTGAGGGAT-
CTAGTC-----TCAGTTATCAGGGCTCGTAATT-----ATGTCGAAGCGACC-----A-----
-----GGAGATATC-----ATCATTTCCACTCCAG-----GATCCAA-----GGTT---
CGTTCGAAGACTGAAC-----TTCGA-----CAGCCATA-----CAGGAAC---
CGTGCTACTGCC-----
-----CCCA----
CTGTCCACGTCACAAATCGAAAACGGGCCTGGGTGAACAGGCCCAT-GTACAGAAAGCCAC-----
-----GAT-----GTACAGGATGTATAG-----
-----AAGCCCAGACATACCTA-----GGGGCTGTGAAG-----
-----GCCCATG-----TA-----
AGGTCCAGTCGTTTGAGCAGAGGGATG-----ATGTGAAGCACCTTGGTATC---TGT-A-----
-AGGTG-ATTAG---TGATGTGACGCGTGGGCCT---GGGCTGACACACAGGGT-----
-----CGGAAA-----GAGGTTT-----TGT--ATCAAGTCCA---
-----TTTACATTCTTGTAAGATC-----TGGCTGGATGA-----
-----AACTATTAAGA-----AGCAAAATCA-----
CACTAATAATGTGAT-----TTTTACCTGCTTAGGGATAGAAGGCCGTAT-----
-GGCAATGCGCCCCAAGACT-----
-----TCGGGCAGATATTT-----AACATGTTT-----G-----
-----ATA-----
ATGAGCC-----CAGTACTGCAACA-----ATTAAGAACG---A-TTTGAGGGATAGTTTCAG-----
-----GTGTTGAGGA---AA-----TTTCAT-----
GCCACTG-----TTGTTGGTGGTCCATA-----
-----TGGCATGAAGG-----
-----A-----GCAGGCGTTGGTGAAGGTTT-----
-----ACAGG---TTGAATCATC-----
ACGTGACATACAATCATCA--G-----GAGGCAGGGAAGTATGAGAATCACACA-----
-----GAGAATGCTTTGCTTC-----TGTACAT-----GGCATGTACTCA-----
TGCCTCCAATCC-----TGT-
ATATG--CG-ACGTTG-----AAAATA-----CGTATA-TACTTCTATG-----
-----ACAGTATT---GGCA---A-----
-----TTAATAAACATTGAATTTTA---TT-----
TCATGAG-----TCAAC-----TTGCACT-----CAAT-----
AGTGTGGCAATTACATTG-----AAC-----
AAAACATGATCAGCAGCTCTAATTACATTGTTAATTGAGATAACACCT-----
ATATTATCCAAGTATTTAATTACT-----TGGTATCTAAAGACCCTTAAGAAAAGA-----
CCAGTCTGAGGCTGT-----AA-----GGTTGTCCAG--ATCTGGAAGTTGAGAAA-----
-----ACATTTGT-----GAATCCCCAGCTCCTTCCCTCAG-----
-----GTTGTGATTGAATCGAACCTGGACTGTTAT-----
GATGTCCTGGTTCAGCAG-----GAA--TGGTCGTTGTTGGTGCCTGGTGATTGTGAAATACAGGGGAT-----
TGTTTTATTTCCAGGTATA-----CACGC-----CATTCATTGCTTGAGGAGCAGTGA-----
-----TGAC---TTCCCCTG--TGCGTAAATCCA--TGATTGAAGCAG--TTGATAT-----
----GGAGGTAATATGAACATCCA-----
-----CAG---ACAAGATCCA-----
-----
CTCTCCTACGCCGGATGGCT-----
CGTTCTTGACTTGTCTGTGAGTGACTTTGATTG-----GAACCTGAGT-----
```

AGAGTGGTTCTGTGAGGGTGATGAAGATTGCATTCTTTAATGCCAGGCCTTTAGCGCTTCTTGCT-----  
TTTCCTCGGCTAGGAACTCTTTATAGGACGAGGTAGGT-CCTGGATTGCAGAGGAAGATAGTGGGAATTCCACCTTTA--  
-ATTTGAACGGGTTTCCCGTATTTTCGTGTTGGACTGCCAGTCCCTCTGGGAC--CCCATGAATTCCTT-----A--  
AAGT--G-----  
CTTTAGGTAGTGGGGATCGACGTCATCAATGACGTTGTACCAGGCAGCATTATTGAAGACCTTTGGACTAAGGTCCAG--  
--GTGTCCACACAGGTAATTAT---GTGGGCCTAA-----  
AGATCTGGCCCATATCGTCTTCCCTGTTCTGCTATCACCTTCTATGAC-AATACTATTAGGTCTCCA-----  
-----  
TGGC-----C-----  
-----GCGCAGCG-GAATCCCT-----A-----  
-----  
-----ACATTATCA---GCGA-CCCATTCCTCAATTTCAACAGGAAGTGGTCAAAGGAA--G-----  
AACATGG--GAAGGGAGA---AACATAAGGAGCTGGTGGCTCTTTGGAAA-ATCCTATCTAAATTACTATT--  
TAGATTATGAAA--CTGAAGTACAAAGTCCTT-TGGGACTAA-----TTCCCTAATGAC-ATTAAGAGCT--  
TCTGAC-----TTACTG-----CCGCTGTTAAG----CGCTTTGGC-GTAAGCAT-----  
CATTCGCTGAT-----TGTTGACCGCCTCTA-----  
-----GCAGATC--GTCCATCGATTTGAAATT-----GTCCCAT--TCGACGGTGTGCG-  
CCGT-----CCTT--ATCCAGATAGGACTTG-  
ACATC--CGAGCTTGATTTGGCACCTTGAATGT----TGGGGTGGAA-----ACTGGTGCTA--  
CAGCTTGGGTGTACAC-----  
AATCGAAGAGACGATTGTTTCGTAATCGTGATTTTACCCTCGAATTGAATGAGGGCATGCAAGTGAG-GTTCCCCATT---  
-----CTGATGCAGCTCTCTACAGATTTAATGAACTT--A-----GGGTTTGATTGGAGA---  
-----GAAAGTGTTTGAATGAATGACAGTAGGTGTTCTTTGGGTATAGAACA---  
CTTTGGGTATGTGAGAAAGACAT-----TCTTGGCTTGAATTCGAAA-----  
-----ACGA-----GG---  
AGTTCATG-----TTGACC--AA-----GT---CAATTGGAGACACT-  
-----  
-----CA-ACTAGAGACT-----  
-----CTTGAGCATCTCCTCCTATTAA-----TTGGAGACA-----TTATATAG-  
-----GTGTCTCTAAATGGCATTCTTGTATAAAGTTGAA-----  
CTTTAATTTGAATTAAGGCTCAAAAGGCTCAGAACC--CAAG-----GGGCCAACCGTA-----  
-----  
-----TAATATT  
>ACSV\_KJ437671  
TAC-----CGTTCGCCCTT-----  
-----T-----TCGGCC-----  
GAGGGGACATTCGTGCGCTCTGAATGGCCCCGA-----  
GGCGTTTGCCTGTTCTGTGAGCTTTATCTTTAAGGAA-----  
AGGTGGCGCATTTTCGTGGTGATTGCTTGCCTAAGCAAGCGTTAG-----TGGACTATAA-----  
-----AGGGAGCT-----GGTGGATGAGATGTTCTATCGGATGG-----  
AGAGGGGTCTTTAC-----  
CGCAGGTAAGCTCCGTCTATGTTCTGAGTCCCCAGCCGACCCGCCCGACGACTT-----  
TCGTGCGGAACGACGGAGCGT-----  
GGAGTTCTTGGTT-----CTCTTGCTTGCTGTACA--GCGTTGGCTGGTGGGACGCTTTTC-----  
-GCCTGCTGGCGGCTTTTGGGAAAGGATCTG-----CTCCTTACCTTGAAGG-----CTCGCCGAGCCGCACGG-  
--TGACGGAGTTA-GGG-----TTCGG-----CCAGACGCCCCCGGGCGTCAGGCTGGA---  
GCAGGTTCTCAACCGG-----TGGGCCGTTTCGGCTAATAACAGG-----GGTAGTGTTC-----  
-----TCACTTCTCTGCAGGATCC-----  
-----CGCCCTAATTGGAGCG-CTGTGATGCCTTCTACCTCGGCGCTCGCAGGCGTCCG--GGAACGAT----GATT-  
-----GG-----GCGTGGGACTCGGCA-----ACTCGCCGTCG--  
TGTA-----CGGCCAAGGACA-----GGTTATG-----  
TACCTAGAGGTCCTAG-----GAGGAAC-----A-----  
AATTGCCTAGCCTG--CA---GGTGG-----ATCAGGACGTA-----TATGCCGCCGCCA---CG-  
-----GCGATTGATGTTAATACGCA-----CGGTGC-----TGATGTCAGCC-  
-----TCCTGACGAACTTCC-----TCCGCGGGACCTCGGAAGAT-----  
-----GCCCGGCACAC-----CAACGAGACTA-----TTCTGTACAA--  
-----GCTCAGCCTGGACCTGTATATCA-----  
TGGTGGATGATGTCCATCAGGTTTATT-----CAGGGAA--GTCAGTTTG--CTGCTGTTGGTTGGTG-----  
-----TACGAT-----GCACAGCCTACCGGTGCTCT--CCCGG-----  
ATGGATCTTCGATCTTC-----A-----

-----GCTACAACGCTGACCTGCTGT-----CTCAGCC-----  
TGCCGTCTGGAAG-----GTGGGCAGGG---A-GGTGTGTCATCGCTTTGTG-----  
GTGAAGCGTTCGATGGG-----TCTTTACTCTAGAGACCA--ATGGG-----  
-----  
TGTAAGG-----  
-CCGGTACGCTGTTTAC-----AAATACAGCCGGTACTATGGGGATACCTCCGTGCAA-----  
----CCGTTCCATATACTTCC--ACAAGTTCT-----  
----GCAAGCGTCTCGGCCTAA-----GAACTGAGTGGGAAGAATAG--C-----  
TCTGGGGGTACCATAGGTGACATTAAA-----  
-----ACGGGTGCGTTTGTAT-----  
--CT--TGTGTTT-----GCAC-----CTGGCAACGCC-----  
-----A-----TGGGCC-----ATAAAGTTC-----  
AGGGTGTGTGA-----AGAAAG-TACTTC-----AAGTCCGTGG-----GTAA-----  
-----  
CCAGTAAAACGGTTACATGT-----AAAATA-----GTT-----TGTAATAAA--  
-----ACGGCAGTTT-----  
-----TATTCATTACAATACCAGTGGCTGCGCTGAGC-----A-----  
-----GCGATTTTGTGA-----CATAATATGGGGGGAC-----  
AGGACAAAGCAGGCGGCT-----ATAGGGCGCGCATG-----  
-----  
-----GGGTAGTCTCAATAAACGCACCCAACCTGAACTCTA-----  
-----GATACA-----  
-----TTCC-----TCCG--ACGTCGATGAGACGT-----  
CGTCCTTTATGAAGGAATCCCCTT--C-A-----TAGAGGT-----  
-----ATACTACTA-CA-----  
-----CAG--TTGCGTTCGA-----  
-----  
-----AG--TACGAACGCTGAGACGCAGTCA--  
TGCGCGCATCCAGTCTTC-----GT-----  
CATCGTTAACGATGACTATTGAGGGGATACCCCCCTT---  
ATTAGCTTCTTCTTCCGTATTTGGGTTGACAGTGAAGTCCTTCTGTCCG--CCGATGAGCGCCTT-----C--  
CAACAAGGACAGTACTTGAATG---GG---ATGTCGTCTATCACGTTGTATTTGGCTTCCACGTCATATG---ACG--  
-TGAAGTCTAC---ATTATTTTGCAGTAGTTGT--GTCGTCCCAG-----  
GCTTCGGGCCCATGTTGATTTGCCTGTCTTGTGGTCCACAGATGTA-GAGGGAGAGGGGTCTTGCCTGTTCATAAC--  
-----GGTGT--ATGAAGCCA-----T-----TGA-----  
AGAT-----CCTCCTGT--GCGTT-----AGCATATGGGTGGAG---  
CAACGAATATACCTCC-GGAGTTAT-----  
-----  
CTCGTAG-----ATGTTGTCA---CGGAC-CCAATCATGTATATTTTCATGA---CAGTGAAAATAGGAGTC--  
CGGAAACGGA--G-----G---TTGATAGACCGCCGGTGTGTC---GAAG-AGCTTGTGGCAGCGTATTC--  
CCAGTTCTGCAG--CCTTGCGCAGAAGTTCGTA-CGGGAATGC-----CTTCTTGACCCC-GTTGAGGAAC--  
TCCTGC-----TTACTGGAGGAC-----CCCGCAGAAATTGACGTCA-----TTAAGACGT-----  
CCTTTCTATCTC-----TTCCGGGGTTCGTTGGCCAGCTCC-----  
CTGGATCGTGATCCTCGTCGTTGATCGGCCTGGGGAGGTGAAGAGCTTGACGAAGCGCCTCCTC--C-----  
AGCTGTATCCTC-----TCCAATGCCACACGCAGCATCT--  
GCGCGTGTTCGCGGGGCCGTAAGGAGCCGTAATTGAATGTTCTGTTGGAGATTT--GAGTATATACGACAGT--  
ACAGT--CTGTGGACTTCTAGCACTCTGGATAT-----TTGGATGAA-----A-----  
ACCTTG-----TA-----  
CATCAAAAAAACCAGGGCTATATGTGTGCACACGTTTGTGAGTTTGGAGCAAGAGCATGAATATGGG-GAGTCCCATC---  
-----CTTATGAAGCTCGCTAGTAACAGTGATAAACAT--A-----ACATGGTAAGGTGAG--  
-----AGTAGGCTGAGTAGGAAGGAACCGATAAGTTCGGAGCCAGGTTACA---  
CCTGGGATATGTGAGGAATATGT-----TTCTGGATTGAAACCTGAA-----  
-----TCCTGATGG--  
CCCTCCATGCTCAGTGTTCATAGAGCGGA-----AGCTTCCAACACTTAGCCA--  
-----AAATT-----TCCGCTC-----TCG-----  
-----AGTGTTTTAT--GTC-----  
-----TTACCTCCGTTTGCCCAAGTGCC-----CAAGG-----  
---CGGGCCTTGGT-----GGGTTTATATA-----  
-----GCCCCGGCTCTTAGGTGGG-----

-----  
-CTGGGCCGAAAGGGCGAACGGTAGCGACCGCGAGGGAGCGCCC-ATAATAT-  
>ALCV\_KP732474  
-ACT-----GGTTTCGC-----TGTGGGCC-----  
-----  
---CACACGGGGCCCCCGACAAATAAAAA-----AGCGAATAACGCGTTGTTCGGTTACTTTTGACC-----  
-----ACTTTAAGTGCTTTTGGATTGCGTGTTTGACACGTCACAA-----  
-----TATTCTATAT-----AAA-----  
-----CAGCAGGATC-----TGAATGTTAT-----GGAACATGTCATTGGGAAGCGTG-----  
-----TTTATGGAA-----TATTGTGC-----TGCTTGGATATTTTGGT-----  
-----GGCAAAATATTGTT-----TTAATATTCTTATTTAC-----  
CATTTTATTTTGGATAAATGGAAA-----GTCGTTTATAC-----  
TTGCTAGAGGAATTGCCCGCAACGTACGGGAAATTACAG-----GGCTTTTGTACGGATCTGTTCTTAGCGGAACA-  
GA-----TTCGG-----AAGGCCTCC-----G--AGTT---AAA-----  
-----GATGTTCAA-----AGAGGCCCAA-----  
-----TGTACATGGTCCTCAGACA-----  
GGCCTTCAGACG-----ATCACAGA-----GGAATAAG-----G-----  
-----CCCCATGGCCTTCAA-----AG-----GTGG--CCCA-----  
-----ATTCAATATGGA-----CTTGGCACTTACTATAAGTAG--  
GGCCAAG-----CAGATAT-----CGG--  
-AG---GAGGC-----CCAATTGTTAG-----TTGATTACAAAAAAAA-----  
TTGAAGATGGTTCGCACGAGATCC-----GGGAGA-----ACGTATGGATC-----  
-----GGCCAGGCCCTTTC-----TTGGGGTTCGGAAGAGGGC-----  
-GAGAACGA-----CAGTTCGCTCT-----CGACCAACACTACTT--  
-----GGGCCGATTCGGA-----  
GGCCAGTTATCAAGTGAAGACCCGAT-----AT--GCTCCTCAT--AGACCTCAGAC-----  
-----TAAGAT-----TCATTGCT--CGCTA-----  
ACACTAGAGTTGTTAGT-----GGGGCGA-----  
-----ACG-----AGGGCTA-----CGG--  
ATGGCAT-----GTATCGGGAGTACC-TATTGGTCTGGGTTTGAAGATAGACAT-----  
AGTGATAAGATTAATA-----TTAATTCCTTTAAATTTTAAGATGCA-----  
-----GATGATGACA-----  
TCAGATGCTGGG-----  
ACCCAAACGACTCTTTGG-----CACAAATGTGTA-----TATGTT-----TTTAGTAAAAGATAATT-----  
-----CTGGTGGAGCACAAGTC--CCAAAAT-----  
-----TCAATTCAATATGTATGA-----TGGATAATTC--AAACCCG--  
-GCAACTGCTGAAAATAGACCACGATTC-----AAAGGATCG-TTTTCA-----  
--GAT--AATTCGA-----AGGTGGAGAT-----  
-----TT-----CAATTC--A-  
AAGGAACTCCACGAGGAATGGAGTTGCTTATGATTGTGCAAAAAATAGACATGATTTT---A-----  
GGGCTAACGTCAAAT-----AAAT-----  
-----TCAATTAGTG-----AATTTAA-----  
GTCT-----GCGACTGAT-----GGTCATATG-----  
-----CAAATACCCAGAAG--AACGCATACACTATGT-----  
-----ATTTTCGTACCCAGACTTATGATAT-----GGTCGT-----  
-----AGACGGTCATTGTACAAT-----GAAATATACGTCAA-----  
TAGTTTGACCGAAGA-----  
-----  
TACTTACGAAATATTGTTGTGGGAAAATCATTTATTTTAT-----  
GAATGAATTAAGGCCGAAGGCCG-----  
TGAACAATTGAAAATTGTAATAAATATTGATCAA-----TAAATATTT-----A-----  
-----TCAATAA-----AATTTATCATTA-----  
-----ATACA-----  
-----  
-AA-----CATGGATTACATTTAATTCCTCCATTCATACATATCACTACTAG-----  
ACAGAGCAGTCTTATAAGACTGAT-----CTGGATTACATAATAAATTGTTGGGATCCCCCAGGC--  
-ACTCTAGTTTTTTTACGGTATTTTTTCATTAACCGTAAAATCTCTTTGAGAT--CCTAACAATTCCTT-----T--

TTACAAGGTAAAACTGAAAAG----GG----ATATCATCTATTACATTATAAGACGCGTGATTATCCCAA---AAC--  
-TAAAATCTAC----ACCCACAAAAGTAGTTAT---GACGCCCTAG-----  
ACTTCTCGCCACGCAGTTTTCCAGTTTTACTGGGTCCTTCAATGAT-  
TAATGTCAGTGGGCGATCCGGTTTCTGGTCCGCATCATCAATAACA-----TTAATATTATTAATATT--ATAAG----  
-----CATCGTTGATTTGAT-----CTGCAGTA-----  
AGATCTTGTGCCAGATCAAATCATCTATAGAAATAGACGGTTCAGT---TAACTGGACCGCGAAG-AGACTTAC-----  
-----GGTGAAG-----ATGTTCTCA-----  
TCTGC-CCATTGTTAATGGACTCCGGTACGCTAGGAAAATGCGTCCATCTGGG-----  
TTGATACACAGTTGGGGGTTTCAGGCCAT-TCTCTACTGGCCATGTACTC--CAGGTTACGCAA--  
CTGGGTTGCGTACGTGTA-CGTTTGTTC-----AGTTCTACATCT-GGAGAGGAAT--TCGGAC-----  
TTGGATGTAGAC-----TCCGTGAGGATGTTGTCC---AGATGGAAT---CCCTAGACTTCT-----  
TAGGACTTCT--TCTTGAAGCTCTAAGT-----  
AATCCTC--G-----TTCCTCAAATAC-----CCCT-----C-----  
-----CCTT--GGAGATGTAGTCGGCG-ACATC---  
TGCATCCCTTCGGGGAATCTGGGTAT-----TTGGGTGATAGGTTGAGAGGCCATTTGGG-----TCCTT-----  
-----GA-----TGTCGAAGAACCTCGGATCCTTGATGTCAATCTTCTTGTCCATCTGGACAAGACAGTGGAGGTGCG-  
GCTCTCCTGA-----TTGGTGTTCCTCCCTGCAGACTCTTGCCTAAGT---A-----  
GGATCCAGTTCTTT-----AATAATTGATAGAGGTAATCGATTAAAAACATTGGGATTAAGGGCA---  
CTGCGGGTAAGTTAAAAAATAG-----ACTTACCCTGAAGTCTGAA-----  
-----GTTTGAAGC-  
ACGTCTAGGCATGTTGACCAGAAGTCAAGGGG-----AATGAAAATGCGTTT-----TAGA--  
-----GAGGG-----TTT-----TCT-----  
-----CAACTTCTT--TCT-----  
-----CTACTATGGTTTTGCGGAGGAAC-----GGAGG-----  
---AACGGAGGATA-----TAATATAATAATAG-----A-----  
-----GGACCGTTAGATGAATGACACG-----  
TT-----  
TCATTCCATCCTACGGTCCACGCGCCATAGCGCGTGGAATGTCGGCCGGCTTTTTCAGCGAAACCAT-----ATAATATT  
>BCSMV\_HQ113104  
-ACC-----GCCCATCTTTAG-CCGAGGG-ACCATGCCCAACCGGTCCC-----  
-----G-----AGG-----  
CGCCCGGACCC--CCCAAACACTAGGGGTTGCACC-----  
-----CCGCAATATGATTTT-----CGAATCTGACTGCCATCT-  
TCCTTTGTTT--TG-----TCTTTA-----TAAGACTAGATCGC--AC-----  
TAGTACGCTA-----TGGCGGAGTACCCTCAGT-----CTGCTTTCGTTTTAT--  
-----CTGGTGC-----GATTCCACATCAAAGCAAGGA---C-----GAAGGCTTTGCCTC-----  
GTCTTTG-----AAGGTTACTGCT-----  
CTATCTTTGTTTCGCAGCA--TTCATTGCTGCTGCCATCTTGTGT-----  
TTCCTATAACAAGACTTGTCTTGCAGATTGC-----TATA-CGCAATACCGG-----ACTACCGGTCTGAGCAGT--  
-ACATCTTCATCTGGC-----TTTGG-----TCGAACCTC-----T---GA---  
GGCTTCGACAGCTGTC-----CCG---CGGACAGCGTCTGA-GGT-----TTCTATTCCCT-----  
TAGGGGATAGATC---TGCTACTCCATCTTC-----CTGTTTACCTA-----  
CATCTGGTATTTTCATCTATTTGATTT--GTCATGACGTC-TTCCT-----  
CGAAGAG-----GAAACGTGGA-----  
-----TCTGGTAAGACGA-----AGACGCGCAAGA-----  
AGGCGCG-----TTACACGAAG-----TGGACATCATCGAG-  
AACAACGTCAGCTGCAGA-----CTCTCTG--CA--GGTAC-----AGACGTTCCCTG--  
---TGGGCTGAGGATCAGTCC-----TTCAAT-----AC-----  
TGGTGG-----AGGTTGCAGAC-----TGCTAACCTCCTTCA-----  
---CGCGTGGTTCAGGAGAGAAC-----CAACGCAAATC-----  
CCAGGAGACCA-----TTACGTACAA-----  
GGTTGCCGTCAACCTT--GGCATCTCC----GCCTCCACTACCGTTCAGAAGTATTGC-----CT---  
GACCAGCCATCCTATATGTTGGCTGGTC-----TACGAT-----  
----AAGACGC---CTGGGATTGCTGACCTGA---CTCCAACCTGACATCTTT-----G-----  
-----ATGTCCCAGACTGGGTTGAACA---  
---ACTGGCC-----TTCAACCTGGAAG-----GTCAAGCGCG---A-AGCATCTCACCGCTTCGTG--  
-----GTGAAACGGCGCTGGC-----CGTTTAGACTGTCCGTCA--  
ATGGC-----TCTACGTTCTCTGCAGA-----  
-----TTATACGA-----



-----AGCTGCCGGTGCCCAATACA-----  
-----GACAACCTGTGTACGATCAACAGGTTTCG-----  
-----CCAAGGGACTTGGAGTGC-----  
GAACCGAATGGAAGGACACGGT-----TTCTGCTGACGCCTC--CGACATCAAG-----  
-----GGCGGAGCC-CTGTAC-----AT--AGTATTA-----GCCC-----  
CGGCTAATGGG-----CT-----TGTATT-----  
-----C-ACAGCTA-----GAGGTGTCATT-----AAAGTG-TACTTC-----  
-----AAGAGTGTGG-----GCAA-----  
-----TCAGT-----AG-----CCC-----  
-----AATGT-AAT-----GAGCCCATAG-----  
-----GGCGAT-----GAATAAAATGGCACATTTTATT-ATGTCAT--TATGACGAACGAGT-----  
-----ACAACGAGAAAATTACATAATTGGT-----  
TTTTTGTGGGTCGCGAGGGGGAACCC-----G-----GAGCACGCACCC---A-----  
AAAACACT-AAAC-----  
-----  
ACACAA-----ACCCAGAATATCTATAGGATACATGGCCGGCGC-----G--  
TG-----CCGATAGTCA-----C-----  
GCTGTAGCTGGCCCTAAGC-TTCGA-----AGAAGCTCTCCCCTG--C-A-----  
-----TACATGT-----AATGTATGA-TA-----  
-----CAG--TTTGTCTCAA-----  
-----AC-----  
CAGCCAACCTGACTAGGTTGCA-TTTGTTTGAGCCAGTCTTC-----  
-----GT-----CCTCGTTCACGAGGATTATTGATGGAACCCATTCTTG---  
AGCATACGTCGTTTACCATATTTTGGATTTACGGTAATGTCAAACCTGGCAT--CCAACAAGCCCTTT-----C--  
CAACAAGGAACGAACCTTGAATG---GT---ATGTCATCTATGACATTGTAAGTTGCGTTAGCAACTAAGT--TGA--  
-GGAAGTCGAC---GCTGTGTTGCCAGTAGTTGT--GAGCTCCCAG-----  
ACTTCTAGCCCAAGAAGTCTTTCCAGTTCTTGTGGTCCGCAAATGTA-GAGTGATCTTCTTCGT--  
TCATCAGGACGTCT-----GTCCTGCTAAT--ATCAG-ACA-----T-----  
CCA-----TTGGAGGT-----CAAGCCTC-----GCTTG-----  
GTCCTCCGTTACGCCATTATGTATGG-----AATATGCATAA-GGACTTAC-----  
-----AGAAAAT-----AATTCTGCT---TGGAG-  
CCATGCTCCAATCACCGGATGT---TCATCCTGTGCTGGCATCC-----C--GAAGGGATC-----  
CATATATGGCGTAGGAACCGAAGGGAAT-AAGCTCTCTGCGGAGTATTG--GAATTGTTGCAA--  
CCTCGTTGCCAATCGAA-TGGGAACGT-----ATTCTGACCAT-CGAGAGATAG--TCCTCC-----  
TTGCAGGTACTG-----CTCTTGATTATCTCCGCCA---TTTTGGCGT---  
CTTTAGTTGATGGAGCATCAACCTTCTTCTTCTCT---G-----  
-----CTT--GGTGCTTGCTTGAAAAC-----CCCCGTTTCTACGAAACATAAG-  
GGGT-----TTTT--TTTGATGTATGCTAAC-  
ACCTT--GTGTGGCATTCTTGCATTCTGCACGT-----TAGGATGAA-----A-----  
TTCTTC-----GA-----  
CGTCGAAGAATTTAGCACTCTTGGTGCGAACATATTTCTTGCATTGTACCAGACAATGCAAATGGT-AAGATCCATC---  
-----TTGATGTTCTTCTCTTGGCCACGTAGACATACGT--G-----GGTTCGAACCTTCGA---  
-----AGAAGGCTTGAGAGGTGTTCTTGCATGAACACCGGATCAAGGTGGCA---  
CTTGCTGTACGTTAAGAAAATGT-----TCCTTGATCTTACCTCGAAG--CA-----  
TGCTGCGACCGCCCTGGGGCGCCAACCTCCCCGCTCGGTGAGCGGGGGGCGCCAGTT--TGCCCCCT--  
GGCGTCTGATGTCTCACTGACAAAGGAGGCCATCTCGTCAGAGGCTATCGTGGATAG-----  
ACTCTCAGCCCTTGGATGATCTTTGAGATC-----CGAGG-----TTT--  
-----TGA-----AAACTCCCT-TCCT-----  
-----AGA---CCCTTGCCCCTTG-----GCGCCCC-  
CCCCCC--GCGCC-----TATCTTA-----TAGGGCCTCGGGTGG-----G-----  
-----TGGCTTT-TTTCT-----GGGCC--GGGCC-  
GGCGTAAA-----GATGGGC---AA-GCA-----

ATAATATT

>BCTIV\_JQ707949

-CCC-----CGCGTTTACC-----  
TTTCCACGTGGCG-----  
--TATGCAAAGT-----G-GGCGGAC-----GGTT-----GAGT-----  
-----GGGGAAC-----ACG-----CTTTA-----  
CTTTAATTTAAAGTAAAGTAGCACTAA--GTGGGACCCACT-----TTTTATTTCTTTAAAGACTTAATTATT--  
-----A--AGTCTTC-----TAGATGC-----GTATAT-TATACGT-----  
ATAAATGATGGTGTGTATTCCCGACTGGTTATTTCTACTTTT-----CGT-----  
ATTTAGTACGA-----TTCTTCAGTCGGGAA-----TTAATTTCTATGGTACCTTTCAG-----  
----AGTGAGCGAATTTCCGCGAAGCTATCCAGCCTTGCTAGCCGTTT-----C-----  
GACGAGCTG-----TTTCTT-----GC-----GTTA--CAACAAGTGGTGTTT-----  
-----GCTCG-----GAATCGAGC-----CTCAAGTTCGCGAGCCCTTGAC-----  
-----  
-----TCTAGAGGAAGGCGAGGACTTTCCTCAATTCAGAAAGGAAGTGAAGAAATTGCT-  
GAAGCTTAAGGTTAGTTTTAAAGCGTAAGTGTAGTTTGTACGAGGACAT-----  
ATACAAGAAGTATGGCGGTTTCAGAGTCAAAGAGAAAGTAT---  
ACTCCTCCGGCCAGTTGGACGAGGAAGAGGAAGACGACCGGTGGGAGGACAGTTTCGAAGAAAT-----  
ACCAATG-----GAAGAGACCGGTGCGA-----AGTAACCGGGCTGTGAAGTTGAAGATG-----  
-----TATGACGACA-T---GTT-----  
AGGTGCATCTGGAGTT-----GGATCTACCATCAGTAA-----TGATGG-----  
-----GATGATCACTA-----TGTTGAACAACACTATG-----  
TTCAAGGAATTGGTGATAGC-----CAGAGGTCAAA-----  
CAACTTGACCG-----TTACCAGGCA-----  
TTTGAAGTTTGATATGTCTCTTATGGCTAGTGGTGCATTTTGGGCGAGTCCTAACCTATAT-----  
-GACTCAATATCATTTGGGTTATT-----GTCGAT-----  
CGTGATGTTGGTCTACGTTTCCGACTC---AGTTGAGTACTATCTTT-----G-----  
-----ATATCCGACTGGTGGTCAGG-----  
CTATGCC-----TTCCACTTATCGG-----ATTAGGAGGG---A-TGCGAATGAACGATTTATC-----  
-----GTGAAGAAGAAGTGGCAGACTC-----ATTTGAT---  
GTCTACTGGTACTG-----ATTATGGAGGAAAGCA-----  
-----GACCTATAAGGC-----  
-----  
GCCTTCAATGCCTAATTATAA-----GAAAGCTATGAACATTAATATTC-----  
-----GGAAT---ATCAATGTGA-----  
-----AGACATTGTGGAAGGACAC---T-----GGAGGTGGCAAATATGAAGATGTGAAG-----  
-----  
-----GAGAATGCTATTCTGT-----ACGTAGT-----GGTTAATGATAA-----  
TACAGATAATACA-----AA-----TAT-----  
GTATG---CT-ACTTTGT-----TTGGTAATTGT-----AGGGCT-TATTTCTATT-----  
-----GATT---A-----  
-----TTAGAAATGC-CCAA-----  
-----TGATATT-----  
GAAGTTGAATA---A-----AAAATTTATTTAAATT-----  
-----  
TGTTTGTGTAAGATT---G--AAATGTAGATATGTAAATATCTAGT-----  
--ATAATTGCCTTGGA-AA-----ACAAAAA-----  
--CGAATAAATGATTGCCGGAA-----  
AACGAAAAAAAAAACCCCTCAGAAATTAGAC-----CCCCGAAAAGCAATAT-----  
-TTTTATA--TTAA-----TCTGCAGCCCATCCACGAA-----GTGGA-----  
-----TGTTACATATTTCAAGAAA-----TAA---CTTAACT-----ATACC---  
AAAC-----TTCATCA-----  
-----  
CTTGCT-----  
-----AAGTAATATACATCGCAATTAGCGTAAAACCAATCTTTCATAGA-----  
TTCACTCATAACAAGGTATCCAG-----TCCATATCTGGATTAGTAATAGCAATACAAGGTCTTCCGCCTGGA--  
-ATG--ACTAAGTTTGGTTTATGTTTTATCCAAACACTATAATCTTCGTTACATCCGATAATAGATTTAAACAAC--  
TCCT--GTTGTATTTTTGATAGCGG-----ATATCGTCTATTATATGGTATGTAGTGTGGTCTATAT--  
CGTATAGAGACC--AATCTAATACCATG-CCAGACATATAGTGGT---GTCGGCCTAG-----  
AGATCTTGCCCACTGGGTCTTTCCTGTTCTGGATGGTCCGCATATGTA-GAGACTTCTTGGTCCGAC-----

-----  
TGGT-----CTGTTGTCTGGCTCCTGG-----  
ACAAATTAAGTACGTTA-GTGTCTTC-----  
ACTACATGCTAGATCGCGACTAAGTCGATCTAGGTGGAAGTATTCTTCAAGAGTCATTTGTCTGTCTTGAAGAATTGCTC  
CCCTGCAATTCTCACATATTTTCGTAATGTAAACAATCTGAACCTACGAA-----ATATATATTTTGTTCG-  
CCCCTCTTTGATAGTGTGAGGTAGCCTAGAGAACTCC--G-----TCCATCT--GGGTGTGTA----  
AGGTTGCACAACCTGGCCTGAAATGATAT-TTGGCG--AAGGATAGAATG--GAAG----GCCA--  
TCTGAGAACGAAATCTGT-TGGGCAGGA-----CTCTCGTATGTTACTGAAGAACT--CCTCCT-----  
--TGGTGTG--GATGAATCAAGAAATCGTCTCCAT-TCCATG-----TTGCTGTTGCCAATACTG-----  
---TTT-----  
GGAGAGC--GCCCTCCAGTCGAAGCT-----CTCCAAATGTTCTAGGGCTCGTGTCTC-----  
-----CCTT--GGTGATATACTCGAAT-GCTCG-----  
CTTTGGGGCGTTGAGTCCGTCGATTC-----TTGGGTGAA-----  
TCGTTCCGACCGTCTGGGAGTATGA-----  
TGTTGAAAAACAGTTCCCATTTGACGTCGAGTTTCTTGTGCACACTGGATAATACAGTGTGTGTGGA-  
ATCCTCCTTCAGGTTGTTCTTCAGTAGGCTGATGATGTTCTAGTGATACTGCAAGGAATAG---A-----  
ATCACATATGATTCT-----  
AATAAGGTCTTCAGTTTCTCGAATATATAATCTTTAAAATCCCCCCTATTTGGGAATATGTTAGAAAAGCAT-----  
-TTTTCTTTTGAACCGTAA-----  
-----ATAAC-----CGGGTTGGTTAGGGTA-----GGT-----  
-----CTGTTTCTGTTTGGAGCAG-----  
-----  
TGGCATGTTTGTFTT-----  
TGTTTCCCTCTTCCGTACAATGAATGAAAAGAAATTTGTATATATGAGAGGAAGAGGAACTTAAGAGGAATGAGGAACTGA  
AGAGGGAGGTAGAG-----GGATAAATA-----  
-----GGTAAACGCGGA-----  
-----  
-----TAAGATT  
>BCTV\_CALogan\_M24597  
-ACC-----GGATGGCCCG-----  
AAAAAATGGGCACCCAATCAAACGTCACACGTGGAAGGGGACTGTTGAATGATGTGACGTTTTTGGAGCGGGAACTTC  
CTGAAGAAGATTCTGCGGGAACTTCCCTGAAGAAGATTCTTTTCAGATAAGATTTGTTGAC----TGGT-  
CAAAGAAGG-----GGACAACCTTTATTAAAGT-----  
AACTTTA-----CTTT--AGTAAAAGTAAAGTAA-----GTGTGCCCCACAG-----  
GAACTTGCTCAGCAAGTTTTGAA--TTATGTCGTT-TTATATACGTTATTTTTACATGTAT--ATGTAATT-----  
-----ATAAATGATGGTCTGTCTACCAGACTGGTTATTTTTGCTATT-----TAT-----  
-----CTTCAGTATTC-----TACTGCAATCAGGTA-----CGAACTTTTATGGGACCTTTCAG-----  
-----AGTGGATCAATTTCCAGACAATTATCCAGCCTTTCTAGCAGTAT-----C-----  
---GACCAGTTG-----TTTCTT-----AA-----GGTA--CAACAGGTGGTGTAT--  
-----ACTAG-----GTATCCATC-----AAGAGAT--AGGGTCTCTGAC-----  
-----  
CCTAGAAGAAGGCGAGGTCTTTTCGTCAATTCAGAAGGAAGTGAAGAAGCTACT-  
GAGGTGTAAGGTTAATTTTCATAGGAAGTGTTCGTTGTATGAGGAAAT-----  
ATACAAGAAATACGTATACAATGTCCAGAAAAGAAAGGTG---  
AATCCTCAAAGTGCGTGGCCGAAGAAGAGGAGGACTAGT-----ACGACTTCGAGGAAAT-----  
ACCAATG-----GAGGAGACCTGTGACA-----AAAAACAGGACTCTGAAGTTAAAGATG-----  
-----TATGATGATA-T---GTT-----  
GGGTGCTGGTGGTATA-----GGATCTACCATTAGTAA-----TAATGG-----  
-----TATGATTACTA-----TGTTGAATAATTATG-----  
TCCAGGGTATTGGTGATAGT-----CAGAGAGCGAA-----  
GAACGTTACTG-----TGACGAAGCA-----  
TTTGAAGTTTGTATGGCTCTTATGGGGAGTTCTCAGTTCTGGGAGACTCCTAATTATAT-----  
-GACCCAATATCATTTGGATTATC-----ATAGAC-----  
AAGGATGTTGGGTCAGTGTTCCTACTA---AGTTATCGAGTATATTT-----G-----  
-----ATATTCGGATAACGGTCAGG-----  
CTATGCC-----GTCTACTTATCGT-----ATTCTGAAGAG---A-TATGAACGAGAGGTTTATT-----  
-----GGGAAGAAGAAATGGAGAAGCTC-----ATTGGAT---  
GTCTACTGGTACTG-----GATATGGAGGGAAGGA-----  
-----GACTTACAAGGC-----  
-----

-----  
TCCTTCAATGCCAAATTACAA-----GAAACCGATGAATATCAATGTGC-----  
-----GCAAT---TTGAACATGA-----  
-----GGACTATTTGGAAAGACAC--C-----GGTGGTGGGAAGTATGAAGACGTGAAG-----  
-----  
-----GAGAATGCTTTACTCT-----ATGTTGT-----TGTTAATGATAA-----  
TACGGATAAATACT-----AA-----TAT-----  
GTATG---CC-ACATTAT-----TTGGCAATTGT-----AGATGC-TATTTTTATT-----  
-----AATA-----ATAT-----TT-----ATTATT-----  
-----AAT-----AATGAAATTAGTACAAGTTCATTGCAA---CA-----  
CTCTGGT-----TCTGAA-----TTACACT-----  
TGATACAAAAGTAAATTCCTCA-----TAC-----  
AGGACATGATTTAAACCTCTAATTACATTATTAATACAAATTAACCT-----  
AGATTATCCAAGTATATCTCTAGT-----  
CTCTTTTTCAAGACCTTCAAGAAACGGGGTCCAGTCAATATCCTGT-----  
TCGATCCAGTTATCGTTCAGCTCTATCCA-----GCACTTGT-----  
-----GAAGATTCAACGCTCTCCGGAG-----  
GTTGTAGTTGAATCTGATTTGTATCTTCAG-----TTGATAGATTGGCCCGTATCTCTCGAAC-----  
-CATAGGAGTTTCATATACAGTGGAT-----TCGGTACATTCTCGAATTC-----GACGG--  
---AATTTGTTGCCGTGATGGAGAGTAA-----TAGG---TTCCCCTG--TGCGAAAATCCT---  
CTATTACA-----TTCATGG-----TGTATTGTGAAGTGGCAGTTA-----  
-----  
-----CAG---GGTAGAGTCA-----  
-----CCTTG-----CGAGGATGCTG--  
CTGCTT-----GGTTATTAA-----  
AGAGCGGACCTTGGAGTTTGCAGAAGGTTGAATTATGTAATGTCCAGGACTTAAGGGCTTCATTTT-----  
CTGGTTTTTCAAGAAATTGTTGGTA-TGAGCTCTCAGGTCTGGATTGCATAATATAATGCAGGGGATACCACCTTTA--  
-ATGACACGTGGTTTTCCATACTTTAAGTTTGTCTGCCACTCCTTTTGTGCT--CCAATAAGGTGTTT-----C--  
CAGT--  
GTTTTCATCTTTAAGTAAGTGGGATCTACGTCATCAATGACGTTGTATTCCACTTCATCATAATACGTTCTAGGGCTAAAA  
TCTAA---GTGCCCTGTGATGTAATTGT---GGCCCCCTAA-----  
AGATCTAGCCCACATAGTCTTCCCTGTTCTTGAATCACCTCTACTAT-GATACTATTATATCTTAA-----  
-----  
AGGC-----C-----  
-----GCGCAGCG-GCATCAAC-----CC-----  
-----  
CGAA-----ATATGCA-----TCAG-CCCATTCCTTGCATTTCCCTCAGGAACGTTTGTGAATGAG--G-----  
ACAGAGG--AAATAGTGG---AGTCCATGGATCAGGTGGCCTCTGAAAT-AT--  
CTTTTGAGCATTGTTCAAAGATTGTGATG--TTGAAGGAAGTAATCCTT-TGGTTGTTT-----  
TTCCTTCAATAT-TTGAAGTGCT--TGGTCA-----AGAGAA-----GTTGCGTTTAA-----  
CGCCTTGGC-ATATGAGT---CGTTAGCTGTC-----TGTTGACCTCCTCTA-----  
-----GCACTTC--TACCGTCGATCTGGAATT-----  
CTCCCCAT--TCAATTGTGTCT-CCGT-----CCTT--  
-GTGCAGCTAGGACTTG-ACGTC---GGAGCTGGATTTAGCTCTCTGAATGT-----TTGGATGGAA-----  
-----AT--GTGCTGACCTGGTTGGGGATACCA-----  
GGTCAATAAATCTGATATTTGTGATCTGAACTTTTCCTTCAGATTGAAGCAGGACGTGGAGATGAG-GTTGCCCATC---  
-----TTCGTGTAGCTCTCTGGCAATTTAATATATTT---T-----TTATTAGATGAAAGT---  
-----TGTATTCTTTGAATTTGCTCAAGAGCTTCTTCTTTTGAAGAGAACA---  
CTGAGGATATGTAAGAAATATGT-----TTTTTGCTTGAATACGAAA-----  
-----TCTT-----  
TTAGTAGGAGGCATT-----GT-----  
ACTCCGATGACGTGGCTTA-----GCAT-----  
-----ATTAACATATCTATTG-GA-----  
GTATTGGAGTATT-----ATATATATTAGTACAACCTTTCATAAG-----GGCCATCCGTTA-----  
-----  
-----

TAATATT  
>BCTV\_CO\_JN817383

-ACC-----GGATGGCCCC--G-  
AAAAAAGTGGCCCCAATTGAAACGTGACACGTGTAATCGCATAATAGGTTGTGCG---GTGCTT-----  
-----GGAAACTTCCTATGTAAGTTTCCCTTCTCTAACCAAGTTTTTGAC----  
TAGTCCAAAAGTTGC-----GGCCGAC-----AACT-----  
----TGCTTTA-----CTTT--TTTAAAGTAAAGTA-----AGTGTACTATTC-----  
---AAACTTGCTGAGTAAGTTTTGGAAT-ATTTTTCTAC-TTAAATA-GCTATACGACTACGTAT--AGGTATTT-----  
-----ATAAATGATGGTCTGTTACCTGACTGGTTATTTTTGCTATT-----TAT-----  
-----CTTCAGTATTC-----TACTTCAATCAGGTA-----CGAACTTTTATGGGACCTTTCAG--  
-----AGTGGATCAATTTCCAGACAATTATCCAGCCTTTCTAGCAGTAT-----C-----  
-----GACCAGTTG-----TTTCTT-----AA-----GGTA---  
CAACAGGTGGTGTAT-----ACTAG-----GTATCCATC-----AAGAGAT---  
AGAGGCTCTGAC-----  
-----  
CCTAGAAGAAGGCGAGGTCTTTCTGCAATTCAGAAAGGAAGTGAAGAAGCTGCT-  
GAGGTGTAAGGTCAACTTTCATAGGAAGTGTTCGTTGTATGAGGAAAT-----  
ATACAAGAAATACGTATACAATGTCCCAGAAAAGAAAGGTG---  
AATCCTCAAAGTGCGTGGCCGAAGAAGAGGAGACTACT-----ACGACTTCGAGGAAAT-----  
ACCAATG-----GAGGAGACCTGTGACA-----AAAAACAGGACTCCGAAGTTAAAGATG----  
-----TATGATGATA-T---GCT-----  
TGGTCTGGTGGTATA-----GGTTCTACCATTAGTAA-----TAATGG----  
-----TATGATTACTA-----TGTTGAATAATTATG-----  
TCCAGGGTATTGGTGATAGT-----CAGCGATCGAA-----  
CAACGTTACTG-----TGACGAAGCA-----  
TTTAAAGTTTTGATATGGCTCTTATGGGGAGTTCCTCGTTCTGGGAGACTCCTAATTATAT-----  
-GACCCAATATCATTTGGATTATC-----ATAGAC-----  
AAGGATGTTGGGTCAGTGTTCCTACTA---AGTTATCGAGTATATTT-----G-----  
-----ATATCCCCGATAACGGTCAGG-----  
CTATGCC-----TTCTACTTATCGT-----ATTCTGAAGAG---A-TATGAACGAGAGGTTTATT-----  
-----GTGAAGAAGAAGTGGAGAACTC-----ATTTGAT---  
GTCTACTGGCACTG-----GCTATGGAGGCAAGGA-----  
-----GACTTACAAGGC-----  
-----  
TCCTTCAATGCCAAATTACAA-----GAAACCGATGAATATCAATGTCC-----  
-----GCAAT---CTGAACATGA-----  
-----GGACTATTTGGAAAGACAC---C-----GGTGGTGGGAAGTATGAAGACGTGAAG-----  
-----GAGAATGCTTTGCTCT-----ATGTTGT-----TGTTAATGATAA-----  
TACGGATAAATACT-----AA-----TAT-----  
GTATG---CC-ACATTGT-----TTGGCAATTGT-----AGATGT-TATTTCTATT-----  
-----AATA---A-AA---AT-----GTTATT-----  
-----TTT-----TTAATACAACCTTATTGCAA---TA-----  
CTAGTAT-----ATTGAA-----TTACT-----  
ATTGACGAAATTGAAGACAGAA-----TAC-----  
AATACATGATTTAATATTTCTATTACAATGTTAATTGAGAGAAAAGAT-----  
CGTTTTTTGATTTCCCTGTCGACT-----  
TGTTTCTTCAAGACTCTCAAAAACGGTCTCCAGTCAATGTCCTGT-----  
GTGATCCAGTGATCGTCAAATCTATCCA-----GCACTTGT-----  
-----GAAGATTCAAGTATTTGCGGAG-----  
GTTGTGGTTGAATCTTATCTGGACTTTTCAG-----TTGATAAACTGGCCCCGAACGGTAGAAG-----  
-TCCTGGAGTTTGAGGTACAGTGGAT-----TCGGTACCAAGTCCACGGG-----TATGG--  
---AATTCGTCGCTTGTTCAGCGTAA-----TGGG---TTCCTCTG--TGCGAAAATCCC---  
TGATTACA-----TTCATGA-----TGAATTGTGAAATGACACTTA-----  
-----CAA---GGAAGATTGA-----  
-----TCTTG-----CGAGGACGCTT--  
CTTGAT-----TGTTATCAA-----  
AGAGAGGACTTGTGAGTTTGGCGAAGACTGAATTTTGTAAATGTCCAGGACCTAAGGGCTTCAATTT-----  
CTGATTTATTTAGGAAGTCCCTGGTA-AGAGCTTCCTTCGCCTGGATTGCATAATATAATACTAGGAATACCACCTTTA--  
-ATGACACGTGGTTTTCCATACTTTAAGTTTGTCTGCCACTCTCTTTGTGCG--CCTATAAGGTGCTT-----C--  
CAAT--

GCTTCATCTTTAAGTAATTGGGATCTACGTCATCAATGACGTTATACAGAACATTATCACTATAAGTTTTTAAACTAAAA  
TCTAA----ATGCCAGTAATATAATTAT---GTGGACCTAA-----  
ACACCTGGGCCACATTGTTTTACCAGTCTTAGAATCACCTCTATGAT-TATACTATTATATCTAAA-----  
-----  
AGGC-----C-----  
-----GCGCAGAT-ACACAACC-----CC-----  
-----  
GAAA-----ATAAGAG-----TCGG-CCCATTCCTGAACAATTTCTGGAACCTTGAGTGAAAGAA--G-----  
ATTGTGG--ATATGGAGG---TTGATATATATCTGGTGGAGGAAGAAAA-ATGGCTTCTAAATTAGGTTT--  
AAGGTTGTGATA--CTGAAAAATAAATTTTC-TGGGAGTTT-----CTCCCTTATTAT-TTGCAGTGCT--  
TCAGCT-----GCATTA-----CCTGCATTTAA---TGCTTCTGC-TGCTGCAT----  
CATTAGCTGTC-----TGCTGGCCTCCTCTA-----  
-----GCAGATC--TTCCGTCGACTTGAAATG-----TACCCAG--TCGACGTAATCA-  
CCGT-----CCTT--CTCGTTGTTTTGTTTT-  
ACCTC--GGATGCTGATTTTGCTCCCTGGAAGT-----TGGGGTGAA-----GG--  
TGGAGCTTGAGGAAGGATGAGTGA-----  
TGTCGAAGTGCTAGGGTTTCTGAATTGTGCTTTACCTTTGAATTGGATGAGGGCGTGGAGATGCA-GGGACCCCTC---  
-----CTGATGTTTTTCCCGGATACTCTCCTAAATAA--T-----TTGTCAGATGGGCAT---  
-----GGAATATTTTTCCATATTTCCAGAGCATCTTCTTTTATAACTGAACA---  
TCGTGGGTATGTGAGAAAGATAT-----TTTTGGCTTTAATTTGCAA-----  
-----TGAT-----  
GGTGATCGAGGCATG-----TGTTAC-----TATTTTC-  
AATTGGGGGCTC-----  
-----TCGT-----  
-----AACTTGTATTAATTG-GGT-----GCTATGGGAGCCC-  
-----TTATATACCA-----CC-AGG-----GCCATCCGCA-----  
-----  
-----TAATATT  
>BCTV\_M1d\_EU586261  
-ACC-----GGATGGCCCC--G-  
AAAATTTTGGCCCCCAATTAGAATGTGCCACGTGTAATAGCACT-----G---GCACAT-----  
-----GAAACTTATCGTGTAAGTTT-CCTTCCCTTA-CAAGTTTTGAC----TAGT-  
CCAAAGTTG-----GGCCGAC-----  
AAATACTTTACTTATAAAGTAAAGTATACTTTA-----CTTT--AATAAAGTAGAAGG-----AT--  
TTACTTTTCCAAAAGTGCACGATACGTTGGAAAAGTGCACGTCACGTTTGGAAC-TTTTGTATTAT-TTAAATA-  
CATATACGACTACGTAT--AGGTATTT-----  
ATAAATGATGGTCTGTTTACCAGACTGGTTATTTTTGCTATT----TAT-----  
ATTTAGTATTC-----TACTGCAATCAGGTA-----CCAACTTTTATGGGACCTTTCAG-----  
---AGTGGATCAATTTCCAGACAATTATCCAGCCTTCTAGCAGTAT-----C-----  
GACCAGTTG-----TTTCTT-----AA-----GATA---CAACAAGTGGTGTAT-----  
-----ACTCG-----GAATCCATC-----AAGAGAT--AGAGGCTCTGAC-----  
-----  
-----CCTAGAAGAAGGCGAGGTCTTTCTGCAATTCAGAAGGTATTGAAGAAGTTACT-  
GAGACTCAAGGTCAATTTCCATAGGAAGTGTCTCTGTATGAGGAAAT-----  
ATACAAGAAATACGTACACAATGTCGCAGAAAAGAAAGGTG---  
AATCTTCAAAGTGCCTGGCCAAAGAAGAGGAGAAGTACT-----ACGACTACGAGGAAAT-----  
ACCAATG-----GAGGAGGCCTGTGTTA-----AAAAACAGGACTTTGAAGTTAAAGATG---  
-----TATGATGATA-T---GCT-----  
TGTTTCAGGTGGTATT-----GGATCTACCATTAGTAA-----TAATGG---  
-----TATGATTACGA-----TGTTGAATAATTATG-----  
TTCAAGGCATTGGTGATAGT-----CAGCGTGCCAA-----  
CAACATTACTG-----TGACGAAGCA-----  
TTTGAAGTTTGTATGGCCCTTATGGGCAGTTCAGCATTCTGGGAGACTCCTAATTATAT-----  
-GACCCAATATCATTTGGATTATC-----ATAGAC-----  
AAGGATGTTGGGTCAGTGTTCCTACAA---AGTTATCTAGTATATTT-----G-----  
-----ATATACCGGATAATGGTCAGG-----  
CTATGCC-----GTCGACGTATCGT-----ATTCTGAAGAG--A-TATGAACGAAAGTTTCATT-----  
-----GTGAAGAAAAAATGGAGAACC-----ATTTGAT---  
GTCCACTGGAAGT-----GTTATGGAGGGAAGGA-----

-----GACGTACAAGGC-----  
-----  
TCCTTCAATGCCAAATTACAA-----GAAGCCGATGAATGTTAATGTTC-----  
-----GCAAT---CTTAACCTTGA-----  
-----GGACCATTTGGAAAGATAC---C-----GGTGGTGGGAAATATGAAGACGTGAAG-----  
-----  
-----GAGAATGCTTTACTTT-----ATGTTGT-----TGTTAATGATAA-----  
TACAGACAATACG-----AA-----TAT-----  
GTACG---CC-ACATTGT-----TTGGCAATTGT-----AGATGT-TACTTCTATT-----  
-----AATA---A-----CATT-----  
-----TAT-----TTAATACAAATTCATAGCAA---TA-----  
CTTGTGT---ACTGAA-----TTACACT-----  
ACTAACGAAATTGAATACATCA-----TAG-----  
AATACATGGTTTAAATATACTTATTACAATATTAATTGAGAGAGAAGAT-----  
CGTTTTTTGATTTCCCTTGTCCACT-----  
TGGGTCTTCAAGACTCTCAAAAAACGGTCCGAGTCAATGTCTCTGT-----  
GTGATCCAGTTATCGTCAAATCGATCCA-----GCACTTGT-----  
-----GAAGGTTGAGAGATTTGCGGAG-----  
GTTGTGGTTGAATCTCATCTGAATTTTGAG-----TTGGTATACCGTTCCGAATCTGTGGAAC-----  
-CATAGTAGTTTGAAGTAGATGGGAT-----TCGGAACGGATCTTGTGG-----TGTTG-----  
---AATGTGTCCCTGTTCCAGGGTAA-----TAGG---TAGTCCCG---TGCGAAAATCCG---  
TGATGGCA-----TTCATTA-----TGAATTGTGAAGTGACACTTA-----  
-----  
-----CAG---GGAAGCTTGA-----  
-----CCTTG-----CGAGGACGCTT-----  
CTGTAT-----CTTTATCAA-----  
AGAGAGGACTGGAGATTTTAAAGAAGATTGAATTTTGTATAGTCCAGGACNTAAGGGCTTCATTTT-----  
CTGATTTTATCTAGGAAGTCCCTCGTA-GGAGCTTCCATCTCCAGGGTTGCATAATAATACTCGGAATACCACCTTTA--  
-ATGACACGTGGTTTCCATACTTTAAGTTTGTCTGCCACTCTCTTTGTGCG--CCTATGAGGTGTTT-----C--  
CAAT--  
GCTTCACCTTTAAGTAAGATGGATCTACGTCATCGATGACGTTATATAAAAACATCATCGTGATATGTTTTTAAACTAAAA  
TCTAA---ATGGCCTGATATGTAATTAT---GAGGCCCTAA-----  
TGATCTAGCCACATAGTCTTACCTGTTCTAGAATCACCTGTAAAGAT-TAAACTATTATATCTAAA-----  
-----  
AGGC-----C-----  
-----GCGCAGCG-GCATCAAC-----CC-----  
-----  
CAAA-----ATAAGAA-----TCGG-CCCATTCCTGCACAATTTCTGGAACCTCGTGTGAAAGAG--G-----  
ATTGTGG--AAAGGGTGG---TTGGTAAATATCTGGTGGAGGAAGAAAA-ATTGCTTCTAAGTTAGGTTT--  
AAGGTTGTGGTA--CTGAAAATAAATTTTC-AGGGAGTTT-----TTCCCTTATTAT-TTGCAGTGCA--  
TCAACT-----GCATTA-----CCTGCATTTAA-----TGCCTCTGC-AGCAGCAT-----  
CATTAGCCGTC-----TGTTGGCCTCCTCTA-----  
-----GCAGATC--GTCCGTCGATTTGAAAAG-----TACCCAG--TCGACGTAGTCA-  
CCGT-----CCTT--CTCGATGTATTGTTTA-  
ACATC---GGATGCAGATTTTGTCTCTTGGGAAGT-----TGGGGTGGAA-----GG--  
TGGAGCTACAGGATGGATGAGTGA-----  
TGTCGAAGTGTCTAGGGTTTCTGAATTGTGCTTTACCTTTGAATTGGATGAGGGCGTGGAGATGCA-GAGACCCATC---  
-----TTGATGTTTTTCTTGAGATACTCTAATAAATAA---T-----TTATCAGATGGGCAA---  
-----GGAATATTTTTCAATATTTCCAAAGCATCCTCCTTTATAATTGAACA---  
ACGTGGGTAAGTGAGGAAAACAT-----TTTGTACTCTAATTTGAAA-----  
-----TGT-----  
GGTCTACGAGGCATA-----TTGAC-----  
TATCTCGTATTGGGGGCTC-----  
-----AAGT-----  
-----AAACTTATTGGAATGG-GGG-----  
GCTCAGGGAGCCC-----TTATATACCA-----CC-AGG-----  
-----GCCATCCGCAA-----  
-----  
TAATATT

>BCTV\_PeCT\_JX487184

-----  
-ACC-----GGATGGCCCC--  
AAAAAAAAAATTGGCACCCAATTATAAAAACGACACGTGTAATCGCACTATGTGA-GATGTGA-ACATTTTAG-----  
-----GCGGGAAACTTCTCTTAGAAGTTTTCAATT-----AAACTTTTGAC----TGGT-  
CAAAAGTTGT-----TGCCGAC-----AAG-----  
TCCTTTT-----TTTT--TTGAAAATAAAGTT-----GCTTTCACATTAC-----  
AAACTTGCTGTCCAAGTTTGTAT-CTTTTAGTAT-TTAAATA-AGTATATGTAC-CGTAT--TGGTACAT-----  
-----ATAAATGATGGTCTGCATGCCAGACTGGTTATTTCTAATCTT-----TAC-----  
----ATTTAGCATCA-----TTATTCAGGGTGGTA-----CGAACGTTTATGGGACCTTACAG-----  
-----AGTGATCAATTTCCCGACAGTTATCCAAGATTTCTTGCCGCTG-----C-----  
--GACGAGTTG-----TTTGGT-----AA-----GTTA--CAACAAATCTTGTAT--  
-----CCAAG-----GCGTGTCTC-----GAGAGAT--CAAGCCGCTGAC-----  
-----  
AATCGAAGAAGCCGAGGCCTTTCTTCAATTCAGAAGGACGTGAAGAAGATACT-  
GAGGCGTAAGTGTCTTTTCAAGTGAAGAAGGCATTATATGTCGAGGT-----  
TTACAAAAGGTACGTTCCAGATGTCGAAAAGAGGAAGGGG---  
ACTTTTCAAAGGGCGTGCCCAAGAAAAGGAAAACGACA-----ACCACTACTAAGAAAGT-----  
ATCAGTG-----GAGACGTCCTCTCACG-----AGGGGGAGGATGTTGAAGTTAAAGATG---  
-----TATGATGACA-T---GCT-----  
GGGCGGTGGAGGTGTC-----GGTACTACTATTAGTAA-----TAATGG---  
-----AATGATTACTA-----TGCTCAACAATTACG-----  
TTCAAGGAATTGGTGATAGT-----CAGAGAGCCAA-----  
CAATATAACCG-----TCACTAAACA-----  
TTTGAAGTTTGCATGGCCCTTATGGGCAGTCTGCGTTTTGGGAGACTCCAAATTATAT-----  
-GACACAATACCATTGGATAATC-----GTCGAT-----  
AAGGATGTTGGGTCCGTTTTCCCTACAA---AGTTGTCTACTATATTT-----G-----  
-----ATATTCCAGATAACGGTCAGG-----  
CGATGCC-----GTCTACATACAGG-----ATCCGGCGTG---A-TATGAATGAGAGGTTTATT-----  
-----GTGAAGAAGAAATGGACAACCTC-----ATTTGAT---  
GTCTACTGGTACTG-----GTTATGGAGGAAAGGA-----  
-----GACTTACAAGGC-----  
-----  
TCCTTCTATGCCTAATTACAA-----GAAGCCGATGAATATGAGTGTTC-----  
-----GTAAC---CTGAATATCA-----  
-----AGACTATCTGGAAAGATAG--T-----GGTGGTGGAAAAGTATGAGGATGTGAAG-----  
-----  
-----GAAAATGCTATCATAT-----ATGTTGT-----TGTAACGATAA-----  
TAGTGATAACACG-----AA-----TAT-  
GTATG--CT-ACTTTGT-----TTGGCAACTGT-----CGTTGC-TACTTCTATT-----  
-----AATA----A-AA-----TC-----ATATTT-----  
-----TATTTATTATTGAAATTACATTAGTACAATTTTATTGCAA---TA-----  
CTTGTTT-----TTTGA-----TTACACT-----  
ACTGACGAAATTGAAAACGCTTA-----TAC-----  
AATATATAATTGAAAATACGAATAATTTTATTAATCGAGATTGAAGAT-----  
TGACGCTCCAGTACCCAATCCAGT-----  
TGTTTCTTCAAGGCTCTCAAAAACGGTCTCCAGTCAATGTCCTGT-----  
GTGATCCAGTGATCGTCAAATCTATCCA-----GCACTTGT-----  
-----GAAGATTCAAGTATTTGCGGAG-----  
GTTGTGGTTGAATCTTATCTGGACTTTCAG-----TTGATAAACTGGCCCGGAGCGGAAGAAT-----  
-TCCTGGAGTTTGAAGTACAATGGAT-----TCGGTACCAAGTCCACGGG-----TATGG--  
---AATTCGTCGCTTGTGTCAGCGTAA-----TGGG---TTCCTCTG--TGCGAAAATCCC---  
TGATTACA-----TTCATGA-----TGAATTGTGAAATGACACTTA-----  
-----CAA---GGAAGATTGA-----  
-----TCTTG-----CGAGGACGCTT--  
CTTGAT-----TGTTATCAA-----  
AGAGAGGACTTGTGAGTTTGGCGAAGACTGAATTTTGTAAATGTCCAGGACCTAAGGGCTTCATTTT-----  
CTGATTTATTGAGGAAGTCCCTGGTA-AGAGCTTCTTCCCCTGGATTGCATAATATAATACTGGGAATACCACCTTTT--  
-ATGACACGTGGTTTTCCATACTTTAAGTTTTGTCTGCCACTCTCTTTGTGCG--CCTATAAGGTGCTT-----C--



CAAT--  
GCTTCATCTTTAAGTAATTGGGATCTACGTCATCAATGACGTTGTACAAAACATTATCACTATAAGTTTTTAAACTAAAA  
TCTAA----ATGACCAGTAATATAATTAT---GTGGACCTAA-----  
ACACCTGGCCACATGTTTTACCAGTTCTTGAATCACCTCTATGAT-TATACTATTATATCTATA-----  
-----  
CGGC-----C-----  
-----GCGCAGCG-GGATCTAA-----AC-----  
-----  
CAAA-----ATAAGAA-----TCGG-CCCACTCTTGAATATTTTCTGGAACTCGAGTGAAAGAA--G-----  
AAAGAGG--AAAGGGTGG---TTGATAAATATCTGGAGGAGGAAGAAAA-ATAGCCTCTAGGTTAGGTTT--  
GAGGTTGTGGTA--CTGAAAAATAAATTTTC-TGGGAGTTT-----CTCCCTTATTAT-CTGCAGAGCT--  
TCTAAT-----GCATTA-----CCTGCATTTAA---TGCCTCTGC-TGCAGCAT----  
CATTAGCCGTC-----TGTTGACCTCCGCGT-----  
-----GCAGATC--TTCCATCGACCTGAAATT-----CACCCAG--TCGATGTGATCT-  
CCGT-----CCTT--TGAGACGTAGGACTTG-  
ACGTC--GGAACTGGATTTAGCTCCCTGAATAT-----TGCAGTGGA-----TT--  
GTTTGCTGGTACTTCGATGTTGCA-----  
GATCGAAGTAACGGGCATTACGGATCTGGACTTTTCCTTGAATTGAATAAGGGCATGCAGATGTG-GTTCCCCATT---  
-----TTCATGTAATTCTCTGCAGATGCGAATATATTT--T-----TTATTGGAAGGTGTA---  
-----TTTATAGCGAGGAGCTGTTCTAAGGCGTCTTCTTTGGTTACTGAACA---  
TTGAGGGTATGTAAGGAAAAAAT-----TTTGGCTTTTTTGTAAAA-----  
-----  
AGGCATA-----TTGAATCGGGCTCTC-----  
-----  
-----TTCA-----  
-----AATCTCTATCAATTG-GGT-----GCTATGGGTGCTC-----TTAAATACCA--  
-----CAAAG-----  
-----GCCATCCGCAA-----  
-----  
-----TAATATT  
>BCTV\_PeYDV\_EU921828  
-ACC-----GGATGGCCCC--G-  
AAAATTTTGCCCTCCCATTTACTAAATGACACGTGTAATCGCACTA-AGTCTGTGC---GCCAATAAT-----  
-----GGAGGGAAC--ACGTGGAGAGTTTGCATGTT-----TGTTGGCGTGGTAGT-  
AAAAAACAT-----AGCCGAC-----ATTGATCTCAT-----  
GACTCTA-----GTTC--TACATA-----TCGTATTC-----  
GACGAGCATTCAAACCTGCTCTGTAAGTTTGGAAATATTATTTCTAC-TTAAATA-GCTATACCAATACGTAT--  
AGGTATTT-----ATAAATGATGGTCTGTTTACCAGACTGGTTATTTTGCATTT-----  
TAT-----CTTCAGTATTC-----TACTGCAATCAGGTA-----  
CGAACTTTTATGGGACCTTTCAG-----  
AGTGGATCAATTTCCAGACAATTATCCAGCCTTCTAGCAGTAT-----C-----  
GACCAGTTG-----TTTCTT-----AA-----GGTA---CAACAGGTGGTGTAT-----  
-----ACTAG-----GTATCCATC-----AAGAGAT--AGAGCCTCTGAC-----  
-----  
-----CCTAGAAGAAGGCGAGGTCTTTCTGCAATTCCAGAAGGAAGTGAAGAAGGTACT-  
GAGGTGTAAGGTCAACTTTTCATAGGAAGTGTTCGTTGTATGAGGAAAT-----  
ATACAAGAAATACGTACACAATGTCCCAGAAAAGAAAGGTG---  
AATCCTCAAAGTGCGTGGCCGAAGAAGAGGAGGACTACT-----ACGACTTCGAGGAAAT-----  
ACCAATG-----GAGGAGACCTGTGACA-----AAAACAGGACTCCGAAGTTAAAGATG---  
-----TATGATGATA-T---GCT-----  
TGGTGCTGGTGGTATA-----GGATCTACCATTAGTAA-----TAATGG-----  
-----TATGATCACTA-----TGTTGAATAATTATG-----  
TGCAGGGTATTGGTGATAGT-----CAGAGATCTAC-----  
TAATGTGACGT-----TGACCAAACA-----  
CCTGAAGTTTGTATGGCCCTTATGGGCAGTTCAGCTTTCTGGGAACTCCAATTATAT-----  
-GACCCAATATCATTTGGATCATA-----ATTGAT-----  
AAGGATGTTGGGTCTGTTTTCCCTGATA----AGCTGGATTCTATATTT-----G-----  
-----ATATACCGTCCAACGGTCCAGG-----  
CTATGCC-----CTCAACGTATCGT-----ATTAGAAGAG--A-TATGAACGAGAGGTTTATT-----  
-----GTTAAGAAGAAATGGACAACCC-----ATTTGAT---

GTCTACTGGAAGTCTTATGGTGGACGTGA  
-----TACCTACAAGGG-----  
-----  
TCCTTCTATGCCAAATTACAA-----GAAGCCTATGAATATCAATGTTC-----  
-----GCAAC-----CTGAATGTGA-----  
-----GGACTATTTGGAAAGATAC--C-----GGTGGTGGCAAGTATGAAGATGTCAAG-----  
-----GAGAATGCTATAAATTT-----ATGTTGT-----TGTTAATGATAA-----  
TACAGACAATACG-----AA-----TAT-----  
GTATG--CC-AC-TTGT-----TTGGCAATTGT-----AGATGC-TACTTCTATT-----  
-----AATA-----A-AA-----TT-----  
ATTTTTATTTATATTTGGATGTTACAATAACAT-----TTAATACAACCTTCATTGCAA--TA-----  
-----CTAGTAT-----ACTGAA-----TTACT-----  
-----CTCAACGAAATTTAAAGCATTG-----TAC-----  
AATACATGATTTAAAAATATCTATTACAATATTAATTGAGAGAGAAGAT-----  
CGTCTTCTGATTGCCAAGTCCACT-----  
TGGCTCTTCAAGACTCTCAAAAACGGTCTCCAGTCAATGTCTGT-----  
GTGATCCAGTGATCGTCAAATCCATCCA-----GCACTTGT-----  
-----GAAGATTCAAGGATTGGCGGAG-----  
GTTGTGGTTGAATCTGATCTGGACTTTGAG-----TTGGTATACCGTTCCGTACCTCTCGAAC-----  
-CAAAGGAGTTTGAAGTAGAGTGGAT-----TCGGTACTGAAGCCACGGG-----AACAG--  
---AATTCGTCGCCCTGTTGAAGCGTGA-----TAGG---TTCCTCGG--TGCGAAAATCCC---  
TGATTACA-----TTCATGA-----TGAATTGTGAAGTGGCACTTA-----  
-----CAG---GGGAGATTGA-----  
-----CCTTG-----CGAGGACGTTT--  
CTGTAT-----CTTTATCAA-----  
AGAGAGGACCGCTGAGTTTGGCGAAGATTGAATTTTGTAAATGTCCAGGACTTAAGGGCTTCATTTT-----  
CTGATTTATCTAGGAAGTCCCTGGTA-AGAGCTTCCTTCCCCTGGGTTGCATAATAAAATACTGGGGATACCACCTTTA--  
-ATGACACGGGGTTTCCATACTTTAAGTTTGTCTGCCACTCTCTTTGTGCG--CCAATGAGGTGCTT-----C--  
CAGT--  
GCTTCATCTTTAAGTGATTGGGATCAACGTCATCAATGACGTTATACAATACATCATCATTATAAGTTTTTAAACTAAAA  
TCTAA---ATGCCCTGATATGTAATTGT---GTGGACCTAA-----  
AGATCTGGCCACATAGTCTTACCAGTTCTTGAATCACCTCTATGAT-TATACTATTATATCTAAA-----  
-----  
AGGC-----C-----  
-----GCGCAGCG-GCATCAAC-----AC-----  
-----  
CAAA-----ATAAGAA-----TCGG-CCCACTCTTGAATAATTTCTGGAACCCGAGTCAAAGAA--G-----  
AAAGAGA--GAGAGGGG---TTGATAAATATCTGGAGGAGGAAGAAAA-ATGGCTTCTAAATTAGGCTT--  
AAGATTATGATA--CTGGAAAATAAATTTTC-TGGGAGTTT-----CTCCCTTATTAT-TTGCAGAGCT--  
TCTGCC-----GCAGTA-----CCTGCATTTAA-----TGCCTCTGC-TGCAGCAT-----  
CATTAGCTGTC-----TGCTGGCCTCCTCTA-----  
-----GCAGATC--GTCCGTCGACTTGAAATG-----TACCCAG--TCGATGTAATCA-  
CCGT-----CCTT--CTCGATGATTTGTTA-  
ACATC---GGAAGTGACCTTAGCTCCCTGAAGGT---TGGGGTGGAA-----GG--  
TGGTGCTATTGAAGGGATGAGTGA-----  
TGTCGAAATATCTGGGGTTTCTGAATTGGGCTTTACCTTTGAACTGGATGAGGGCGTGGAGATGCA-GAGTCCCATC---  
-----TTTATGTTTTTCTGGAACTCCTAATAAATAA---T-----TTATCAGATGGGCAA---  
-----GGAATATTTTTCAATATCTCGAGAGCATCTTCTTTTATAATCGAACA---  
CCGTGGGTATGTGAGAAAGACAT-----TCTTGGCTCTAATTTGAAA-----  
-----AGAA-----  
GGCGAACGAGGCATG-----GTTAC-----TGTTTG-  
TATTGGGGGCTC-----TCCA-----  
-----AACTTGTATGAATGG-GGT-----GCTTTGGGAGCCC-  
-----TTATATACCC-----TC-AGG-----  
-----GGCCATCCGCAA-----  
-----  
-----TAATATT

>BCTV\_SpCT\_AY548948

-ACC-----  
GGATGGCCCCGAAAAAAAAAACGTGGCCCAATAAAAAAATGCCACGTGGAA-  
AGCATATGATGTCGATGTGATATTTTT-TG-----  
GCGGGAAACTTCCTGAAGAAGTTTTCTTTCCCGCTCATTTTTTTTGAC---TTAGTCAAAA---GT-----  
-----AGCCGAC-----ATA-----GTTTTGA-----  
AATAAAGTTAAAAGTAGATGACTGTGGTCCCCACAG-----  
GAACTTGCTCAGCAAGTTTCGAA--TAATGTCGGT-TTATATACGTTATTTTTACATGTAT--ATGTACTT-----  
-----ATAAATGATGGTCTGTCTACCAGACTGGTTATTTTTGTTATT-----CAT-----  
-----CTTCAGTATCC-----TCCTACAATCGGGTA-----CCAATTTTTATGGGACCTTTCAG-----  
-----AGTGGATCAATTTCCCGGAAATTATCCTGCCTTGCTAGCCGTTT-----C-----  
---GACGAGTTG-----TTTCTT-----AA-----GGTA---CAACAGGTGGTGTAT--  
-----ACTAG-----GTATCCATC-----ACGAGAT---CGAACCGTTGAC-----  
-----  
ACTAGAAGAAGGCGAGGTCTTTCTGCAATTCAGAAAGGAAGTGAAGAAGTTACT-  
GAAGCGTAAGTGCAATTTTGAAGGAAGTGTGCTTTATATGAGGAAAT-----  
ATACAAGAAATACGTATCAAATGTGCGCAGAAAGAGAAAGGCACCCAAGTTCAGACTGTATGGCCGAAGAAGAGGAAGACG  
-----ATGACTTCCAAGAAGT-----ATCAATG-----GAAGAGACCTGTGCAA-----  
-----AAGAATAGGTCTCTGAAATTGAAGATG-----TATGACGACA-T---GCT-----  
-----TGGTTCGGGTGGAATT-----GGTTCTACCATTAGTAA-----  
-----TAATGG-----TATGATCACAA-----  
TGCTGAATAATTATG-----TGCAAGGTATTGGTGACAGT-----CAGAGGTCTAC-----  
-----TAATCTGACTG-----TTACTAAACA-----  
-----TTTGAATTTGATATGGCTCTTATGGGGAGTTCTGGTTTTTGGGAAACTCCTAATTATAT-----  
-----GACCCAATATCATTGGATTATT-----GTGGAC-----  
-----AAGGATGTTGGTTCTGTTTTCCAGACA---AGTTGGATACCATATTT-----  
G-----  
ATATTCCGCCCAATGGTCAGG-----CTATGCC-----GTCTACGTACCGG-----ATTCGAAGAG--  
-A-TATGAATGAAAGGTTTATC-----GTGAAGAGGAAGTGGACTACTC-----  
---ATCTGAT---GTCTACTGGAACAG-----CTTATGGTGGTCTGTA---  
-----CACGTATAAGGG-----  
-----  
--TCCGTCTATGCCGAATTACAA-----GAAAGCAATGAATATCAATATTC-----  
-----GTAAT---CTGAATATAA-----  
-----GGACTGTTTGAAGGATAC--T-----GGTGGTGGCAAGTATGAAGATGTGAAG-----  
-----  
-----GAGAATGCAATTATTT-----ATGTTGT-----AGTTAATGATAA-----  
-TACAGACAATACA-----AA---CAT-----  
GTATG---CT-ACTTTGT-----TTGGAATTGT-----AGATGC-TATTTTTATT-----  
-----AATA---A-AT---AA-----GAAGTT-----  
-----T-----TTAATACAAGTTCATTGCAA---TA-----  
CTTGTGT-----CTTGTA-----TGACACT-----  
GTTTACAAAGTTGAAAACATCA-----TAC-----  
AATATATATTCTAATATATTAACACTACAATATTAATAGAGATCGTTTTCC-----  
CTCCTTGTGATAGCCAACCTGGAGT-----  
TGGCGTTTTCAAGACTCTCAAGAAACGATCTCCAGTCAATGTCCTGT-----  
GTGAGCCAGTGATCGTCAAATCTATCCA-----GCACTTGT-----  
-----GAAGATTCAAGAATCGCCGGAG-----  
GTTGTGGTTGAATCTGATCTGGACCTTCGT-----CTGGTATACTGGTCCATACCTCTGGAAC-----  
-CATAGGAGTTTGTATGTATAGTGGAT-----TCGGTACTGAAGCCACTTG-----GACTG--  
---CTCTGGTTCGCTGTTGGAGAGTAA-----TAGG---ATCCCCTG---TGCGAAAATCCC---  
TGATGACA-----TTCATGA-----TGAATTGTAAAATGGCACTTA-----  
-----CAT---GGTAGAATGA-----  
-----CCTTC-----TTGGGGCGTTT--  
CTGAAG-----CTTTATCAA-----  
AGAGAGGACCCCAGATTTTTGCGAAGGTTGAATTCGTAGCGTCCAGGACTTAAGCGCTTCATTCT-----  
CTTGTTTTATCTAAGAAGTCTGGTA-GCTACTCCCTTCGCCTGGGTTGCATAATATAATACTAGGAATACCACCTTTA--  
-ATGACACGTGGTTTTCCATACTTTAAATTTGTCTGCCACTCTCTTTGAGCG--CCTATTAGATGCTT-----C--

CAGT--  
GCTTCATCTTTAAGTAATTGGGATCCACATCATCAATGACGTTATATAGTACGTCATCACTATATGTTTTTAAACTAAAA  
TCTAA----ATGCCCACTAATATAATTAT---GTGGACCCAA-----  
AGACCTGGCCACATGTTTTTCTGTTCTAGAATCACCTCTATGAT-TATACTATTATATCTAAA-----  
-----  
AGGC-----C-----  
-----GCGCAGCG-GCATCAAC-----CC-----  
-----  
CGAA-----ATAAGAA-----TCGG-CCCACTCTTGAATAACTTCTGGAACTCTAGTGAATGAA--G-----  
ATAAAGG--AAAAGGTGG---TTTATAGATTTCTGGAGGTGGAAGAAAA-ATAGCTTCTAGGTTAGGTTT--  
TAAATTATGAAA--TTGAAAAATATATTTCTC-AGGGAGCTT-----TTCCCTGATAAT-CTGCATAGCT--  
TCTGCA-----GCAGTA-----CTGCGTTTTAA---GGCCTCTGC-TGCAGCAT----  
CATTAGCCGTC-----TGTTGACCTCCGCGT-----  
-----GCAGATC--TTCCATCGATCTGAAATT-----CACCCAG--TCGATGTAATCT-  
CCGT-----CCTT--TGCGACGTAGGACTTG-  
ACGTC--GGTACTGGATTTAGCTCCCTGAATAT-----TGCAGTGGA-----TT--  
GTTTGCTGGAACCTCGATGTTGCA-----  
GATCGAAGTAACGGGCATTACGGATTTGGACTTTGCCCTCGAATTGAATAAGGGCATGCAGATGCG-GTTCGCCATT---  
-----GTCGTGTAACCTCCCTGCTTATTCTAATATATTT--T-----TTATTGACGGAGTG---  
-----GAGATTGCTAGAAGCTGTTCTAAAGCTTCTTTCTTTAGAAATGGAACA---  
TTGAGGATATGTTAAAAATAAT-----TCTTTGCTTTCTATAAAA-----  
-----  
AGGCATT-----TTGTATTGGGCTCTC-----  
-----  
-----TCCA-----  
-----AAACTGTTTTCAATTG-GGT-----GCTTTGGGAGCTC-----TTAAATACCA--  
-----TC-GGG-----  
-----GCCATCCGCAA-----  
-----  
-----TAATATT  
>BCTV\_Svr\_X97203  
-ACC-----GGATGGCCCC--C-  
AAAAAATACGTGGCCCAATGAAAAATGCCACGTGGAA-AGCAAAAAGATGTTGATGTGGTGTATTT-GG-----  
-----GCGGGAAACTTCCCTGAAGAAGTTTTTCATTTCCCGCCCTTTGTTTTGAC---TTAGTCAAAAAA--  
GT-----AGTCTAT-----ATAG-----C-TTTGA--  
-----AATAAAGTTAAAAGTAGATGACAGTGGTCCCCACAG-----  
GAAACTTGCTCAGCAAGTTTTCAA--ATATGTCGGT-TTAAATACGTTATTTTTAGATGTAT--ATGTAGTT-----  
-----ATAAATCATGGTCTGTCTACCAGACTGGTTATTTTTGCTATT-----TAT-----  
-----CTTCAGTATTC-----TTCTGCAATCAGGTA-----CCAACTTTTATGGGACCTTTCAG-----  
-----AGTGGATCAATTTCCAGACAATTATCCAGCCTTTCTAGCAGTAT-----C-----  
---GACCAGTTG-----TTTCTT-----AA-----GGTA---CAACAAGTGGTGTAT--  
-----ACTAG-----GTATCCATC-----AAGAGAT--AGAGGCTCTGAC-----  
-----  
-----  
CCTAGAAGAAGGCGAGGTCTTTCTTCAATTCAGAAAGGAAGTGAAGAAGCTACT-  
GAGGCTTAAGGTTAATTTTCAAAGGAAGTGTTCGTTGTATGAGAAAAAT-----  
ATACAAGAAATACGTATAACAATGTCCCAGAAAAGAAAGGTG---  
AATCCTCAAAGTGCGTGGCCGAAGAAGAGGAGGACTACT-----ACGAGTTCGAGGAAAT-----  
ACCTATG-----GAGGAGACCTGTGACA-----AAAAACAGGACTCTGAAGTTAAAGATG-----  
-----TATGATGATA-T---GTT-----  
GGGTGCTGGTGGTATA-----GGATCTACCATTAGTAA-----TAATGG-----  
-----TATGATTACTA-----TGTTGAATAATTATG-----  
TCCAGGGTATTGGGGATAGT-----CAGAGAGCTAA-----  
GAACGTTACTG-----TGACGAAGCA-----  
TTTGAAGTTTGTATGGCTCTTATGGGGAGTTCCTCGTTCTGGGAGACTCCTAATTATAT-----  
-GACCCAATATCATTTGGATTATC-----ATAGAC-----  
AAGGATGTTGGTTCAGTGTTCCTACTA----AGTTATCGAGTATATTT-----G-----  
-----ATATTCCCGATAACGGTACAGG-----  
CTATGCC-----GTCTACTTATCGT-----ATTCTGAAGAG--A-TATGAACGAGAGGTTTATT-----  
-----GTGAAGAAGAAAATGGAGAACTC-----ATTTGAT---

GTCTACTGGTACTG-----GATATGGAGGGAAGGA-----  
-----GACTTACAAAGC-----  
-----  
TCCTTCAATGCCAAATTACAA-----GAAACCGATGAATATCAATGTCC-----  
-----GCAAT---CTGAACATGA-----  
-----GGACTATTTGGAAAGACAC--C-----GGTGGTGGGAAGTATGAAGACGTGAAG-----  
-----  
-----GAGAATGCTTTACTCT-----ATGTTGT-----TGTTAATGATAA-----  
TACTGATAAATACT-----AA-----TAT-  
GTATG---CC-ACTTTGT-----TTGGCAATTGT-----AGATGT-TATTTTTATT-----  
-----AATA-----A-AA-----AT-----ATTATT-----  
-----TTT-----TTAATACAATTTTCATTGCAA---CA-----  
CTCTGGT---TCTGAA-----TTACACT-----  
TGATACAAAATTAATTTCTTCA-----TAC-----  
AGGACATGATTTAAACCTCTAATTACATTATTAATACATAGTAAACCT-----  
AGATTATCCAAGTATATCTCTAGT-----  
CTCTTTTTCAAGACTTTCAAAAAACGGTCCCCAGCCAATGTCCTGT-----  
GTGATCCAGTGATCGTCAAATCTATCCA-----GCACTTGT-----  
-----GAAGATTCAAGTATTTGCGGAG-----  
GTTGTGGTTGAATCTTATCTGGACTTTTTCAG-----TTGATAAACTGGCCCCGGAACGGAAGAAG-----  
-TCCTGGAGTTTGTGGTACAATGGAT-----TCGGTACCAAGTCCACGGG-----TATGG--  
---AATTCGTCGCTTGTGTCAGCGTGA-----TGGG---TTCCTCTG--TGCGAAAATCCC---  
TGATTACA-----TTCATGA-----TGAATTGTGAAATGACACTTA-----  
-----  
-----CAA---GGAAGTTTGA-----  
-----TCTTG-----CGAGGACGCTT--  
CTTGAT-----TGTTATCAA-----  
AGAGAGGACTTGTGAGTTTGGCGAAGACTGAATTTTGTAAATGTCCAGGACCTAAGGGCTTCATTTT-----  
CTGATTTATTGAGGAAGTCCCTGGTA-AGAGCTGCCTTCGCCTGGATTGCATAATATAACTGGGAATACCACCTTTA--  
-ATGACACGTGGTTTCCATATTTTAAGTTTGTCTGCCACTCTCTTTGTGCG--CCTATAAGGTGCTT-----C--  
CAAT--  
GCTTCATCTTTAAGTAATTGGGATCTACGTCATCAATGACGTTATACAGAACATTATCACTATAAGTTTTTAAACTAAAA  
TCTAA---ATGCCAGTAATATAATTAT---GTGGACCTAA-----  
ACACCTGGCCACATTTGTTTTACCAGTTCTTGAATCACCTCTATGAT-TATACTATTATATCTAAA-----  
-----  
AG-----  
-----GCGCAGCG-GGATCCAA-----AC-----  
-----  
CAAA-----ATAAGAA-----TCGG-CCCACTCTTGAATAATGTCTGGAACCTAGTGAAAGAA--G-----  
AAAGAGG--AAAAGGTGG---TTGAAAAAGATCTGGAGGAGGAAGAAAA-ATAGCCTCTAAGTTAGGTTT--  
GAGGTTGTGATA--CTGAAAAATATATTTTC-TGGGAGTTT-----CTCCCTTATTAT-CTGCAGAGCT--  
TCTAAT-----GCATTA-----CCTGCATTTAA-----TGCCTCTGC-TGCAGCAT-----  
CATTAGCCGTC-----TGTTGACCTCCGCGT-----  
-----GCAGATC--TCCATCGACCTGAAATT-----CACCCAG--TCGATGTGATCT-  
CCGT-----CCTT--TGAGACGTAGGACTTG-  
ACGTC---GGAACTGGATTTAGCTCCCTGAATAT----TGCAGTGGAA-----TT--  
GTTTGCTGGTACTTCGATGTTGCA-----  
GATCGAAGTAACGGGCATTACGGATCTGGACTTTTTCCTTCGAATTGAATAAGGGCATGCAGATGTG-GTTCCCATT---  
-----GTCATGTAATTCTCTGCAGATGCGAATATATTT---T-----TTATTCGAAGGTGTA---  
-----TTTATAGCGAGTAGCTGTTCTAAGGCGTCTTCTTTGGTTACTGAACA---  
TTGAGGGTATGTAAGGAAAAAAT-----TTTGGCTTTTTTGTAATA-----  
-----  
AGGCATA-----TTGAATCGGGCTCTC-----  
-----TTCA-----  
-----AATCCCCTATCAATTG-GGT-----GCTTTGGGTGCTC-----TTAAATACCA--  
-----CCAAG-----  
-----GGCCATCCGCAT-----  
-----  
-----TAATATT

>BCTV\_SvrPep\_FJ545686

-----GGATGGCCCC--G-  
-ACC-----  
AAAAAATACGTGGCCCAATGAAAATATGCCACGTGGAA-AGCTAAAGATGTTGATGTGATGGATTT-GG-----  
-----GCGGGAAACTTCCTGAAGAAGTTTTTCATTCCCGCCCCTTTTTTTTGAC---TAGTCAAAAAA--  
GT-----AGCCGAC-----ATAT-----TATTTGA--  
-----AATAAAGTTAAAAGTAGATCATTGTGGTGACTATTC-----  
AAAACCTTGCTGTGCAAGTTTGGAA--TTATTTCTAC-TTAAATACGCTATACGAATACGTAT--ATGTATTT-----  
-----ATAAATGATGGTCTGTTTACCAGACTGGTTATTTTTGCTATT-----TAT-----  
-----CTTCAGTATTC-----TACTGCAATCAGGTA-----CGAACTTTTATGGGACCTTTCAG-----  
-----AGTGGATCAATTTCCAGACAATTATCCAGCCTTTCTAGCAGTAT-----C-----  
---GACCAGTTG-----TTTCTT-----AA-----GATA---CAACAGGTGGTGTAT--  
-----ACTAG-----GTATCCATC-----AAGAGAT--AGAGGCTCTGAC-----  
-----  
CCTAGAAGAAGGCGAGGTCTTTCTGCAATTCAGAAAGGAAGTGAAGAAGCTACT-  
GAGGCGTAAGGTTAATTTTTCATAGGAAGTGTGCTTTGTATGAGGAGAT-----  
ATACAAGAAATACGTACACAATGTACAGAAAGAGAAAGGTG---  
AATCTTCAAAGTGCCTGGCCGAAGAAGAGGAGACTACT-----ACGACTTCGAGGAAGT-----  
ACCAATG-----GAGGAGACCTGTGACC-----AAAAACAGGACCCTGAAGTTAAAGATG---  
-----TATGATGATA-T---GCT-----  
GGGTGCTGGTGAATA-----GGATCTACCATTAGTAA-----TAATGG---  
-----TATGATCACTA-----TGTTGAATAATTATG-----  
TCCAGGGTATTGGTGATAGT-----CAGAGAGCGAA-----  
TAATGTGACTG-----TGACGAAGCA-----  
CTTGAAGTTTGTATGGCTCTTATGGGAGTCTCCGTTCTGGGAGACTCCTAATTATAT-----  
-GACTCAATATCATTGGATTATC-----ATAGAC-----  
AAGGATGTTGGGTCAGTGTTCCTGATA---AGTTGGCTACTATATTT-----G-----  
-----ATATTCGGATAACGGTCAGG-----  
CTATGCC-----CTCAACGTATCGT-----ATTCGAAGAG---A-TATGAACGAGAGGTTTATT-----  
-----GTTAAGAAGAAATGGACAACCT-----ATTTGAT---  
GTCTACTGGTACTG-----GATATGGAGGGAAGGA-----  
-----TACTTACAAGGC-----  
-----  
TCCTTCAATGCCAAATTACAA-----GAAAGCTATGAATATCAATGTCC-----  
-----GCAAT---CTGAATGTGA-----  
-----GGACTATTTGGAAAGATAC---C-----GGTGGTGGCAAGTATGAATACGTCAAG-----  
-----GAGAATGCTATAATTT-----ATGTTGT-----TGTTAATGATAA-----  
TACCGACAATACG-----AA-----TAT-  
GTATG---CC-AC TTTGT-----TTGGCAATTGT-----AGATGT-TACTTCTATT-----  
-----AATA---A-AA---AT-----ATTATT-----  
-----TTT-----TTAATACAATTTTCATTGCAA---TA-----  
CTAGTAT-----TCTGAA-----TTACACT-----  
CTCAACAAAATTGAATACATAA-----TAC-----  
AATACATGATTTAAACCTCTAATTACAATATTAATAGAGAGAGAACCT-----  
AAATTATCGATGTCCCTGTCTACT-----  
CGGTTCTTCAAGACTTTCAAAAACGGTCCCCAGTCAATGTCCTGT-----  
GTGATCCAGTGATCGTCAAATCGATCCA-----GCACTTGT-----  
-----GAAGATTGAACGATTTGCGGAG-----  
GTTGTGGTTGAATCTCATCTGGACTTTGAG-----TTGATAAACTGGCCCGGAACGGAAGAAG-----  
-TCCTGGAGTTTGGAGTACAATGGAT-----TCGGTACCAAGTCCACGGG-----TATGG--  
---AATTCGTCGCTTGTGTCAGCGTGA-----TGGG---TTCCTCTG--TGCGAAAATCCC---  
TGATTACA-----TTCATGA-----TGAATTGTGAAATGACACTTA-----  
-----CAA---GGAAGATTGA-----  
-----TCTTG-----CGAGGACGCTT--  
CTTGAT-----TGTTATCAA-----  
AGAGAGGACCGGTGAGTTTGGCGAAGACTGAATTTTGTAAATGTCCAGGACCTAAGGGCTTCATTT-----  
CTGATTTATCGAGGAAGTCCCTGGTA-AGAGCTGCCTCCCCTGGATTGCATAATATAATACTGGGAATACCACCTTTA--  
-ATGACACGTGGTTTTCCATACTTTAAGTTTTGTCTGCCACTCTCTTTGTGCG--CCAATAAGGTGCTT-----C--

CAAT--  
GCTTCATCTTTAAGTAATTGGGATCAACGTCATCAATGACGTTATACAATACATCATCATTATAAGTTTTTAAACTAAAA  
TCTAA----ATGCCCTGATATGTAATTGT---GTGGACCTAA-----  
AGATCTGGCCACATAGTCTTACCAGTTCTTGAATCACCTCTATGAT-TATACTATTATATCTAAA-----  
-----  
AGGC-----C-----  
-----GCGCAGCG-GAATCAAC-----AC-----  
-----  
CAAA-----ATAAGAA-----TCGG-CCCACTCCTGAATAATTTCTGGAACCCGAGTGAAAGAA--G-----  
AAAGAGG--AAAGGGGGG---TTGATAAATATCTGGAGGAGGAAGAAAA-ATGGCTTCTAAGTTAGGCTT--  
AAGGTTGTGATA--CTGAAAAATAAATTTTC-TGGGAGTTT-----CTCCCTTATTAT-CTGCAGAGCT--  
TCTGCT-----GCAGTA-----CTGCATTTAA---TGCCTCTGC-TGCAGCAT----  
CATTAGCCGTC-----TGCTGGCCTCCTCTA-----  
-----GCAGATC--TTCCGTCGATCTGAAATG-----TACCCAG--TCGATGTAATCA-  
CCGT-----CCTT--TCCGATGTAGGACTTG-  
ACATC--GGAACTGGATTTAGCTCCCTGAATAT-----TGCAGTGGA-----GG--  
TGGTGCTATTGGAAGGATGAGTGA-----  
TGTCGAAGTGTCTGGGGTTTTCTGAATTGTGCTTTACCTTTGAATTGGATGAGGGCGTGGAGATGCA-GAGCCCCATC---  
-----TTCATGTAATTCCTGGAGACTCTAATATATTT--T-----TTATTGGAAGGTCTA---  
-----GGTATAGCTAGGAGATGTTCTAAGGCGTCTTCTTTGGTTACTGAACA---  
TCTAGGGTATGTAAGGAAAAAAT-----TCTTGGCTTTTTTGTAAAA-----  
-----  
AGACATA-----TTGAATCGGGGTCTC-----  
-----  
-----TTCA-----  
-----AAACCCCTATGAATTG-GGT-----GCTTTGGGAGCTC-----TTATATACCG--  
-----CCAAG-----  
-----GCCATCCGCA-----  
-----  
-----TAATATT  
>BCTV\_wor\_AY134867  
-ACC-----GGATGGCCCC--G-  
AAAATTTTTCCCTCCCATTTGAAACGTGACACGTGTAATCGCATTATAAGTTGTGC---GTACTT-----  
-----GAAACTTACATAGGAAGTTT-CCTTCTCTTA-TAAGTTTTGAC---TAGT-  
CAAAGTTGT-----GGCCGAC-----AAAT-----  
ATTTTTA-----CTTT--TGTAAGTAAAGGA-----ATTGTTACTATTC-----  
AAAATTGCTGTGTAAGTTTCGAAT-TTATTTCTAC-TTAAATA-GCTATACGAATACGTAT--AGGTATTT-----  
-----ATAAATGATGGTCTGTTTACCAGACTGGTTATTTTTGCTATT-----TAT-  
-----CTTCAGTATTC-----TACTGCAATCAGGTA-----CGAACTTTTATGGGACCTTTCAG-----  
-----AGTGGATCAATTTCCAGACAATTATCCAGCCTTTCTAGCAGTAT-----C-----  
---GACCAGTTG-----TTTCTT-----AA-----GGTA---CAACAGGTGGTGTAT--  
-----ACTAG-----GTATCCATC-----AAGAGAT--AGAGCCTCTGAC-----  
-----  
CCTAGAAGAAGGCGAGGTCTTTCTGCAATTCAGAAAGGAAGTGAAGAAGCTACT-  
GAGGTGTAAGGTCAACTTTTCATAGGAAGTGTTCGTTGTATGAGGAAAT-----  
ATACAAGAAATACGTATACGATGTCCCAGAAAAGAAAGGTG---  
AATCCTCAAAGTGCGTGGCCGAAGAAGAGGAGGACTACT-----ACGACTTCGAGGAAAT-----  
ACCAATG-----GAGGAGACCTGTGACA-----AAAAACAGGACTCCGAAGTTAAAGATG-----  
-----TATGATGATA-T---GCT-----  
TGGTGCTGGTGGTATA-----GGATCTACCATTAGTAA-----TAATGG-----  
-----TATGATTACTA-----TGTTGAATAATTATG-----  
TCCAGGGTATTGGTGATAGT-----CAGAGAGCGAA-----  
CAACGTTACTG-----TGACGAAGCA-----  
TTTGAAGTTTGATATGGCTCTTATGGGGAGTTCCTCGTTCTGGGAGACTCCTAATTATAT-----  
-GACCCAATATCATTTGGATTATC-----ATAGAC-----  
AAGGATGTTGGGTCAGTGTCCCTACTA----AGTTATCCAGTATATTT-----G-----  
-----ATATTCCGGATAACGGTTCAGG-----  
CTATGCC-----GTCTACTTATCGT-----ATTGGAAGAG--A-TATGAACGAGAGGTTTATT-----  
-----GTGAAGAAGAAGTGGAGAACTC-----ATTTGAT---

GTCTACTGGTACTG-----GTTATGGAGGCAAGGA-----  
-----GACTTACAAGGC-----  
-----  
TCCTTCAATGCCGAATTACAA-----GAAACCTATGAATATCAATGTCC-----  
-----GCAAT---CTGAACATGA-----  
-----GGACTATTTGGAAAGACAC--C-----GGTGGTGGGAAGTATGAAGACGTGAAG-----  
-----  
-----GAGAATGCTTTACTCT-----ATGTTGT-----TGTTAATGATAA-----  
TACGGATAAATACT-----AA-----TAT-  
GTATG---CC-ACATTGT-----TTGGCAATTGT-----AGATGT-TATTTCTATT-----  
-----AATA-----A-AA-----AT-----A-TGTT-----  
-----TTT-----TTAATACAACCTTCATTGCAA---TA-----  
CTAGTAT---ATTGGA-----TTACACT-----  
ATCGACGAAATTGAAAGTAGAA-----TAC-----  
AATACATGATTCAATATTTCTATTACAATGTTAATTGAGAGAGAAGAT-----  
CGTTTTTTTGATTTCCCTGTCTACT-----  
TGTTTCTTCAAGACTCTCAAAAAACGGTCTCCAGTCAATGTCCTGT-----  
GTGATCCAGTTATCGTCAAATCGACCCA-----GCACTTGT-----  
-----GTAGGTTGAGCGATTTGCGGAG-----  
GTTGTGGTTGAATCTCATCTGGACTTTGAG-----TTGATATATCGTTCCGAATCTCTCGAAC-----  
-CATAGTAGTTTGAAGTATAGTGGAT-----TCGGAAGTATGTTGTTGG-----TGTTG--  
---ATTTTCGTCGCCCTGTTCCATGGTAA-----TAGG---TAGTTCCG---TGCGAAAATCCG---  
TGATGGCA-----TTCATGA-----TGAATTGTGAAGTGACACTTA-----  
-----  
-----CAG---GGGAGATTGA-----  
-----CCTTG-----CGAGGACGCTT--  
CTGTAT-----CTTTATCAA-----  
AGAGAGGGCCGGAGAGTTTAACGAAGGCTGAATTCGTATAGTCCAGGACTTAAGGGCTTCATTTT-----  
CTGATTTATCTAGGAAGTCCCTGGTA-AGAGCTGCCATCTCCTGGATTGCATAATAATACTAGGAATACCACCTTTA--  
-ATGACACGTGGTTTTCCATACTTTAAGTTTGTCTGCCACTCTCTTTGTGCG--CCTATGAGGTGTTT-----C--  
CAAT--  
GCTTCATCTTTAAGTAAGCTGGGTCTACGTCATCAATGACGTTATATAAAAACATCATCGTGATATGTTTTTAAACTAAAA  
TCTAA---ATGCCCGATATGTAATTAT---GAGGTCCTAA-----  
TGATCTAGCCACATTGTCTTACCCGTTCTAGAATCACCCCTCTATGAT-TATACTATTATATCTAAA-----  
-----  
AGGC-----C-----  
-----GCGCAGCG-GCATCCAC-----CC-----  
-----  
CGAA-----ATAAGAA-----TCGG-CCCATCTTGAACAATTTCTGGAAGTGGAGTGAAGAA--G-----  
ATTGTGG--GAATGGTGG---TTGATAAATATCTGGTGGAGGAAGAAAA-ATGGCTTCTAAGTTAGGTTT--  
AAGGTTGTGATA--CTGAAAAATAAATTTTC-TGGGAGTTT-----CTCCCTTATTAT-TTGCAAGTGTCT--  
TCAGCT-----GCATTA-----CCTGCATTTAA-----TGCTTCTGC-TGCTGCAT-----  
CATTAGCCGTC-----TGCTGGCCTCCTCTA-----  
-----TCAGATC--TCCGTCGACTTGAAATG-----TACCCAG--TCGACGTAATCA-  
CCGT-----CCTT--CTCGATGATTGTTTA-  
ACATC---GGATGCAGATTTTGCTCCCTGGAAGT---TGGGGTGGAA-----GG--  
TGGAGCTTGAGGAAGGATGAGTGA-----  
TGTCGAAGTGTCTAGGGTTTCGGAATTGTGCTTTACCTTTGAATTGGATGAGGGCGTGGAGATGCA-GAGACCCATC---  
-----TTGATGTTTTTCTGGGATACTCTAATAAATAA---T-----TTATCAGATGGGCAA---  
-----GGAATATTTTTCAATATTTCAAGAGCATCTTCTTTTATAATTGAACA---  
TCGTGGGTATGTGAGAAAGATAT-----TTTGGCTTTAATTTGAAA-----  
-----TGAT-----  
GGTGATCGAGGCATG-----GTTAC-----TATTCC-  
TATTGGGGGCTC-----  
-----TCGT-----  
-----AACTTGTATGAATGG-GGT-----GCTATGGGAGCCC-  
-----TTATATACCA-----CC-AGG-----  
-----GGCCATCCGCAA-----  
-----  
-----TAATATT



>BGYMV\_D00201

-----GGATGGCCGC-----  
-----CCGCGCCCCT-----  
-----TTATATCCGTA-----CTGCT-CCACGTGGT-----  
-----GCTTTAA-----TTTA-AATT-----  
-----AAAGAT-----GTCTATTTTGT-----AC-----  
-TGACCAATG---CTTTTGCATG-TGAG-----AAGCTTAGA-----  
TATTTGTGTAAAACCTGGCGACTAAGTT-----T-----  
-TACCTTCGTTTA-----TAAATTTAAATTAATGTATGCC-----CATT-----CCATGT-----  
-GTAAGTCCAGAATGCCTAAGCGTGA-----T-----GCGCCGTGG-----  
CGTCATATGGCGGGAA-----CCTCAA-----GGTT--TCCCGTTCTGGCAAT-----TAT-----  
-----TC-----TCCAAGT--GGTGAATGGGC-----  
-----TCAA---AATCAA-----CAAGCCAATGCATGGGTCAACAGGCCCAT-GTATAGAAAGCCAAG--  
-----GAT-----ATATCGGATGTACAA-----  
-----AAGCCCAGATGTGCCAA-----  
AGGGATGTGAAG-----GACCTTG-----CA-----  
AGGTCCAATCATATGAACAACGCCATG-----ATATATCTCATGTTGGTA-A---GGT-T-----  
-ATGTGTATATC-----CGATATCACACGTGGGAAT-----GGTATTACCCATCGTGT-----  
-----TGGTAA-----ACGTTTT-----TGT--GTGAAGTCTG-----  
-----TGTATATTTTAGGTAAGATA-----TGGATGGATGA-----  
-----AAACATCATGC-----TTAAGAACCA-----  
TACCAATAGTGTGAT-----TTTTGGTTGGTCCGTGACCGTAGACCATAT-----  
-GGAACC--CCTATGGATT-----  
-----TTGGTCAAGTTTTT-----AACATGTTT-----G-----  
-----ACA-----  
ATGAACC-----TAGTACTGCTACG-----GTCAAGAACG--A-TCTTCGTGATCGTTATCAA-----  
-----GTTATGCATA--GG-----TTCAAT-----  
GCAAAGG-----TGTCTGGTGGTCAATA-----  
-----TGCAAGCAACG-----  
-----A-----GCAAGCCTTGGTAAGGCGTTTTT-----  
-----GGAAG--GTGAACAACC-----  
ATGTCGTCTATAACCACCA--G-----GAAGCAGGAAAATACGAGAATCATACG-----  
-----GAGAATGCGTTATTGT-----TGTATAT-----GGCATGTACACA-----  
TGCCTCTAATCC-----TGT-----  
ATATG--CG-ACATTG-----AAAATT-----CGGATC-TATTTCTATG-----  
-----ATTCGATA--ACCA--A-----  
-----TTAATAAAATTTATATTTTA--TA-----  
TCATGAT-----TCTCAA-----GTACA-----  
---GTATTTACATAT--GATTTGTTT-----  
GTTGCGAACTGAACAGCTCGAATGACATTGTTTATTCCATTACGCCT-----  
AACCTATGTAAATACAATAAACT-----AAGAGTCTAAAT-CTATTTAAATATGT-----  
CGTCCCAGAAGCTTGAATC--GA-----TGTCGTCCAG--ACTTGGAAGTTCAGGAA-----  
-----TGCTTTGT-----GGAGATCCAGTGCTTTCCCTGAG-----  
-----GTTGTGATTGAACCTGACTTGGATG--TGG-----  
TATATCCT--TGTCCTGT--GTATGCTGGATCTTCCACCC--GCATGATCTTGAATAAAGGGGAT-----  
TTGGTACCTCCCAAATAAA-----AACGG--AATTCTCTGCCTGATGCGCAGTGA-----  
-----TGTT--CTCCCCTG--TGCGTGAATCCA--TGATCTGCGCAC--TTGATAT-----  
---GGTAAAATATGGAACAGCCG-----CAG--TTCAAGTCAA-----  
-----  
TGCCTCGTCGACGAA-----  
TGGCTTTATGTTTGGCAATCCTGTGCTGTGCTTT-----GA-----T-----  
AGAGGGGGCTGTGAGGGTGACGAAGATCGCATTATGAATGGTCCAGTTGTGTAAAGCTCGGTTTT-----  
CCTCTTTGTTGAGGAAGTCTTTATA-ACTGGAACCCTCACCTGGATTGCACAGCAGATTGATGGTATTCCTCCTTTA--  
-ATTTGAACCGGCTTCCATATTTACAGTTGGATTGCCAGTCTTTTGTGCC--CCAATTAGCTCTTT-----C--  
CAGT--  
GCTTTAACTTCAAATAATTGGGGCTTATGTCATCAATGACGTTGTATTCCTGAGTTGGAATAGACACGTGAATTAAG

TCCAA----ATGACCGCTCAAATAATTAT---GTGGGCCTAA-----  
TGCACGAGCCACATTGTCTTTCCAGTTCGTGAATCACCTTCGACGAT-GATACTAATAGGTCTTTC-----  
-----  
TGGC-----C-----  
-----GCGCAGCG-GAACCCT-----TC-----  
-----  
CGAA-----ATA--GTCG----TCAA-CCCAGTCTTGCATAACAACCGGAATATTGACGAATGAT--G-----  
ACAACGG--AAATGGAGG---AACCATGGTTCGGCACTTTGAAGAAG-ATCCGTTTCGAGATTAGAACG--  
GATGTTGTGATT--TTGAAGGACGTAATCTTT-CGGTTGTTT-----TTCCTTCAATAT-TGTCAAGGCA--  
GATTCA-----ATTGAA-----TCTGCGTTTAA----TGCCTTTCG-GTATGAGT----  
CGTTGGCAGAC-----TGCTGACCTCCTCTT-----  
-----GCAGATC--TGCCGTCGACTTGAATT-----GTCCCAT--TCGATTGTGACT-  
CCAT-----CTTT--GTCCGATGATTTCTTTG-  
ACGTC--GGAACCTGATTTAGCTCCCTGAATGT----TCGGATGGAA-----AT--  
GTGCTGACCTGGTTGTGGATACCA-----  
GGTCGAACAATCTTTTATTTGTGCAGATGAATTTACCTTCGAACTGAATAAGCGCATGAAGATGGG-GTTCACCATT---  
-----ATCGTGACGTTCCCTCACAGACCTTGATGAATTT--C-----TTATTCGTCGTTGTA---  
-----TGAATCTTTTGAAGTTGCGAAAGAGCTTCTTTCTTTTCGGTATAGTGCA---  
ACGAGGATAAGTGAGGAAATAGT-----TTTTGGACTGAACTCTAAA-----  
-----TCTTT-----GAGG--  
TGGTGGCATA-----TTTGTAATATGCGAGTGTCTCCAAATGAGTTTGCAGTGTCTCCAATTGAGG-----  
-----  
-----CTCCTCAAACCTCT-----  
-----CGCTAT--GCAATTGGAGAC-----TGGAGTACA-----  
ATATATACTA--GAACCCTCAATCTCTTGAATTATCACATCCATACAC-----  
-----GTGG-----CGCCATCCGATA-----  
-----  
-----TAATATT  
>CCDaV\_JQ920490  
-AC-----AGGCACTCCC-----  
-----A-----CTGTGA-----  
---CACGTG-GCAGTTTAGCAGCCACAAA-----  
CAGAGATATGATTGAGAGATGCTCTACGTGGAATAACCTGAGGCCGTTAGATTTGTGTTTCTCACTTTAAATAATAACCA  
TTGGA-----TGAGCTATCCATGCGAATCCCG--GTTATTGGTT-----  
AGGTTTGAATAG-GTATT-----CAA-----ATTTTGATTATGAAACGTGTTGGGCAC-----  
GTTTCCTCGTGCTATATAAACGTGGAATACTATGCGTATTTGTA---CATGGAGAAAGGATTATTTGGGGAACAC---  
-ACGGAGAAG-----GTATTGATC-----  
TGTGTACTTGTTTTTTTTTATTCAATCCAAATCATAAGCAATGTGTCATT-----AT-  
GCATTAAGTGTTCAA--GATTTGCCCGAGAGTTTGTTCGGT-----  
TTAATGAGCATGTTGAGTGTGAGGTATTTA-----AAGTGTGTGGAAGAGA-----GGGAAATGGAGAGAAGCC--  
-TAATGG--TA-GGGAATCCCGTAGGAGGAGCCCTGGG-----TAATGCTCG-----TATACTT---  
ATA-----C--GGTT-----AATACGTAGA-----  
-----TACTGCAGGTGTAGAGACT-----  
-----GGGTAAGGAAAGGT-AGGGTCAATGGTGAAGTACCA-----GGAGTGA-----GGAC-  
-----AATATG-----GGACAAGCCGTGTAA-----CGACTGTGGAG--  
ACGC-----TGC-CGATGTGG-----GCCACAA-----  
AGAGAAGAAGGAGGCC-----CAGGTGG-----CCGAGAAAGGAAAA-----  
GAAGCCCAAGATTG---CT---GG-GG-----CTGTATTTGTGAAGGCCCGCCAGGAGAAAGTGC--  
-----  
AGCAAAGGTGTTCTCCGGGGTGTAAAGGGCCCATGTAAAACACACACGGTGGATGTGATAAAGACTATTTATCACGATGG  
CCGTGGATCTGGAATGATTTCAAATATTGACCGAGGTGATGAGCTAGGTCAAAGGGAAGGAAGGAAAATAAGGGTTTAC  
GTATGATCATACTGGCAAGATCTGGTTGGACGTGAATAATGCATCCGTACCAGGAAGCAATTTAGCTAAAATATGGATT  
TTCAAGGATAGGAGACCGGGGACTGAACCGGTTGCTTTTAAAT-----GCGCTGATGGATA--  
TGTCTGATTAG-----AA---CCACTCAGT---  
GCATTTGTGAAGGTGACTACAGGGACAGGTTTATTGCCCTTCACACTATGACGGTAGACCTGCACGGTGGAAAGGATTT  
TAGGGTTGACGA---GCTTG---ACTTGGATGAGTTAGTT-----  
GAGATAAACAGTGATGTTTTGTTTAGTCATGAGGACGATGGGTCTGTGGCCATACGATCCAAAATGGTATTTTTATATA  
TTATGCTTGTAGTGATCC-----TAG---ACAGACT-----GTGCAAATAA---C-TG-----  
CACAGGCTCGATTGTATTTTTATGATTCTACATCAAATTAATAAAATTTAAT-----  
ATTTTTTTTTTAAATAGA--

ATGGACGGTCAAGATTTGGTGTACAAAGACTATCATAGCACGAGACGTATTGAATACCCCTCTAAGTGATGAGTGGCAGCA  
GATAAAGCTTGCATTCCTTAGTATGAAGGAGATTAGCTGGCATAAGTTACGTGGTCAATGCATGAAAATTGACCATTGTC  
AGATACGGTATGATCCGCAAGTACCTGCTAATGCAGAAGGGAATGTATTGGT-----TGTGGT-----  
ACACGATAGACGTATGGAAGCTGACAAGTCAATGCAAGC---TGA--  
ATATACTTTTTCCAATACGATGTGGAATAGAACTTAACTACTATTCCCTGTTTCGTATTTTTTCGTTGAAGGACCCAGTACCAT  
GGTGTGTATACTATAGGGTGTGAACTCTACTGTGTTGAAGGGTTC--  
TCATTTTTGTCAATTTAAGGCGCGCGTGAAGCTAAGCGCGGCTAAATCAAGTAGCCCAATTGGGTTCAGGGGTCCAAGTG  
TTAAGATTTTAAACAAGGCATTCAACGAAGACCAGGTGGATTTTCATGCACGTGGGCATCCCGAAGTCAGAAAGGGTG-  
TTATGCAGGAGTAAT---  
AGTGTTTTAAACGACCCGGCCAGATTGAATCTTGAGGCTGGGGAGAGTTGGGCCTCGAAAAGTATATTATCAGGCGAAGG  
TGGATCGGAGGTTGGTGATTCCGGC-----CCATAT-----A-  
GGGGTTTGGCTCAGTTAGGCCAGACGCGATTGATCCAGGTGATAGCGCGTC-TAATTTGGGT-----  
GATCCAAAATCAGTTGCGGATGAAG-----  
-----TCATTAGA-A-----GACTTAA-----  
CAGT-----TCAGTTATT-----GGG-----ATG-----  
-----GAC---TTAA--AC--AGTTCAAAATTT--GC-----  
-----A-----GAGATAATTGGAGA-----  
TGCAGTACTCAAGGGAAGTGTGATCAACAGTAGAGATAATCAGGCCCTCAAC-----  
AAGTAATGCTAATG-----  
ATTATAAGAAAAAAGCTTGGCTTAAAATTGTATAATTTGTAATTAACGGGGTACGCTTAAGCATTTGTTTGAGCCGAGG  
C-----  
TTTCGAGGCGAGTCACCCCGAAATATAATTTGCCAGAAAATCAATA--TGTTT-----  
-----ATTATAGATAATAAAGGCACG-----AAGT-----  
--GCCGTACA--AGGATACGAAATCAAATACACGCAAACAACACTAGTAGAATACATCAGTGG--G-G-----  
-----TCCATAT-----AATGCATAAGTA-----  
-----CAT---TTTGGTTCCA-----  
-----C-----  
CAGTCCTTTATTGTGGGTGACA-TATAAGTTAACCAGTCCAT-----  
----AT-----CTGGATTAACACATATTATGGACGGTATGCCTCCCTTA---  
ATAGTGCATCGGGTCTATACTTAATGTTAACGGTAATGTTTTTTTGGGAC--CCCACTAAGGATTT-----  
CATAACCTCATGTGAGATTTTGGTGTATTGG---ATGTCATCAATGACGTTATACAGTGCCTGGTTCGTTGTAGT---  
CGT--GGAATTTGAT---GGCACCCGTGAAGTAGTTGT--GTAGGCCCTAA-----  
ACTTCTGGCCAGGCGGTTTTGCCTGATCGGCTTGGGCCGAGATGTA-GAGGGATTTGGGCCTGTCGGGCTTGGAGTC-  
-----TGGTTCCTGTGCTC--GTCACACCAGAAGTGATGTT-----GCA-----  
AATTAATTGGGCACTCAGTCTCAAAT---ATTGC-----TTTTGGACAGCAGGAATAACACAGTT--  
-CATACTGTAAAAATGGTTTACTTAC-----  
--ACATAG-----GATGTTCTG---CTGGGCCACTGCTTGACGTGTTTCAGGA---AGGTTTCGGGAAT---  
TCTGTGAAAGCAGG--TATGAACGG---TTCACGTAGT-----CTGCAGT-AGTT-----GTCACGTGC--  
GAACGCTGAGA-----TCGCTGGCCATCTGAG-GACGAAGTCTGATGGTCTGAGCTCTCTGACTAG-GTTAAGGAAG--  
GACCGT-----TCGTTCGGTTGCC-----TCGAGGAGCACGTCCCTCC-----ACAGTTTTT-----  
CTTGATCCTTTT-----GTGGGGA-----TCG---TGCTCTGGAGTTGAAG-----  
-----CGTCCTT--C-----CTCCACATAGTT-----GCCG-----  
T-----CCTTCATGAGGTATTTTCTGGA-GGCCG--  
CTGGTGATTTCAAG--GACTCGATACAGGGATGGAATGAC-----C-----  
TCTCTCTGCGTACGGAGAGGA-----  
GGTCAAGAACCAGGGGTTCTGTGTTTCGACCCGTTTCTTGCACTGGATCATGGCATGAAGGTGTG-GGTCTCCGGA---  
-----TTCGTGGAGTTCCCTCACACACGCACATGTAAGT---G-----ATTGTGAATCGTGCG--  
-----AGTGTAGTCAAGGAAAGCTTGGAGGTGTTCCCTTGGTGCATGGGCA---  
CTTGGGGTATGTAAGGAAAATAT-----TTTTGGCTGAGAATCGGAA-----  
-----GCTAGAGGAAGTGAAGCCA-----TGTTG-----TAC-----GGAT-----  
-----TGGTG-----G-----AGG-----  
-----AAAGATTAGC---CCC-----  
-----CTTATGGTAG---TGGGAGTGGG-----  
-----A-----  
-----GTGCCAATT-----TT-----

-----AT-----ATAATATT  
>CGMV\_AF029217  
-ACC-----TGAGGGCCGC-----TTTC-----  
--GGTGTACCCACGC-----AC-----CAATCAG-GATGCGC-----  
-----CATTG-----CGCT--TATTTATTAACTGGGC-----  
-----CTCTAT-----ATATTGGGCTTTGTTGTG-----  
TATTGGATTTGCACCATGTTTAACCCACTAACTGAACCCCTCCCAGTT-----  
ACTCCTCACGGTTTGATGTGTATG---TTGGCTTTGAAATA-----TTTGCAG----GAGTTCGAGAA-  
ATCTGTACATT-----TGACTCCGTGTGATA-----ATACTGAGTTGTTGTTACTCCGC-----  
---CGTGTATTTCGTGCAAGGACTT-----ACGATGAAGCGAAG-----C-----  
GCCGATACC-----ATATATTCCACACCT-----TCCAA-----GGCT--CGAAGGAGTTGACG-----  
-----TTCGA-----CACCCCTCG-----TGC GACT--C-----CTGCG-----  
-----TCCT----TAGGGCGTTCCAA---CAAAGGCGGGCTTGGGAGAACCGGCCCAT-  
GAACCGCAAGCCCAT-----GAT-----  
GTACCGGCTTTGGAG-----GAGTCCCTGATGTTCCGT-----  
-----ATGGTTGTGAGG-----GTCCATG-----TA-----  
-----AGGTTCACTCTTTCGAGGCCAGACACG-----ACGTCAAACACACGGGAA-C---TTT-T-----  
-----CAGTGTGTTTC---AGACGTTACTCGGGGAATG-----GTTTTGACTCATCGCGT-----  
-----TGGGAA-----GCGTTTC-----ACC--  
ATAAAGACTA-----TCGGTATCTGGGGCAAGATC-----TGGATGGATGA-----  
-----TAACATCAAGT-----TGAAGAACCA-----  
-----CACTAACATAGTCAT-----CTTTTTCTTAGTGCGTGACCGGCGTCTTAGT-----  
-----GGAGAA---CCAGTTTCTT-----  
-----TTGGAAGTTTGTTT-----AATATGTTTC-----G-----  
-----ATA-----  
-----ACGAGCC-----AACTACGGCCACT-----GTGAAGCAAG---A-  
ATATCGTGATCGTTTTCAG-----GTTATGAGGA---GG-----  
--TTTCAT-----GCATCTG-----TTACCGGTGGACAGTA-----  
-----CGCTTCAAAG-----  
-----A-----ACAGGCGTTGGTTAAGCGTTTTT-----  
-----TCAGGAACATTAATCATC-----  
-----GAGTTGTTTACAACCAACA--A-----GAAGGCGCAGAGTACAAGAATCATCAT-----  
-----GAAAATGCTTTGATGT-----TGTATAT-----GGCATGTAGTCA-----  
TGCCTCTAATCC-----TGT-----  
GTACG---CG-ACAATT-----AAAGTT-----CGCATT-TATTTTTACG-----  
-----ACTCCATT-----ACGA-----A-----  
-----TTAATAAAGATTGAATATTA---TT-----  
TCATATT-----TTGGGT-----CTACA-T-----CAAT-----  
TGTTCCATGAATTACATCA-----AAC-----  
AACACATGATCGCACGCTAAAATACATGTATTAATTGAAATGACACCT-----  
AATCTATCTAAATAACGCATAACT-----TGTTGTTTAAAGACTCTCAAGAAACGC-----  
CAGGTCTGACTCCGT-----AA-----GACTGTTGAG--ATAGTCAATGTCATCCA-----  
-----GCATTTGT-----GAATCCCCAAGGCTTTCTGAG-----  
-----GTTGTGGTTGAACTGGAGTCGAATT---AC-----  
TATTTTCGTGGAACGGTAATCC--CAT--TACCCATTCGTGGTGGCTCATCACCTTGAATATATTGCAT-----  
TTGGGACTGTCCAGATATA-----GGCGC-----CATTCTGCGCTTGAGCTGCAGTGA-----  
-----TGGA---CTCCCCTG--TGCGTAAATCCA--TGGTTGGCACAC--TCTATTG-----  
---CGAGGTAGTATGAACAACCA-----  
-----CAG---GTTAAATCAA-----  
CTCGTCGGCGCCTGATCTGT-----  
TTCTTTTTAGCTATTCTGTGTCTGACTTTTTATTG-----GAATTTGAGT-----  
AGAGCGGGAAGGAGATGTCGACGAAGATTGCATTCCTTTAATGCCCACTGCTTTAAATCTTTATTT-----  
TATCTTCATCCAAGAAGCTTTTATA--GGAGCTATTTGGTCTGGATTGCAGAGGAAGATAGTGGGAATTCCTCCTTTA--  
-ATTTGAATTGGTTTCCCGTACTTTGTGTTGCTTTGCCAATCGTGCTGGGCA--CCCATGAATTCCTT-----A--

AAGT--G-----  
CTTTAGATAGTGC GGATCGACGTCATCGATGACGTTATAACCAGGCATTATTGCTATACACTTTTGGACTTAGGTCCAG--  
--ATGACCCGCATAGGTAATTGT--GCGCACCTAA-----  
TGATCTGGCCACATTGTTTTCCCTGTTCTTGACTCCCCTTCAATGAC-TATGCTAATCGGTCTATC-----  
-----  
CGGC-----C-----  
-----GCGCAGCG-GCATCCAC-----C-----  
-----  
-----ACGTTGATT----GACG-CCCAATCTTTCATGATCTGAGGAACGTTATTGAATGAG--T-----  
TTAACCT--AAACGGACA---AGAATAGGGCTCTAATGGCTTACTGAAA-ATGCGATCTAAGTTGCTTTT--  
AATGTTGTGGTA--ATGTAAGACGAAGTCCTT-CGGAGCAAG-----TTCTTTCACAAAT-GTTGAGAGCC--  
TTCGTC-----GGACTT-----CCAGAGTTAAT----TGCTGCGGC-GTAAGCGT----  
CGTTGGCTGAT-----TGTTGTCCTCCTCGG-----  
-----CTAGATC--TTCATCGATCTGGAATT-----CGCCCAT--GAGATGGTGTCT-  
CCAT-----CCTT--CTCGATATAGGACTTG-  
ACGTC--GGAGCTCGATTTTGTCCCTGAATGT-----TTGGATGAAA-----CA--  
CGGCAGATCTGTTTCCAGAGACAA-----  
GGTCGAACAGTCTTGGATTTGTGATCTGGAGCTTACCTTCAATTGTAGCAGTACGTGCAGATGAG-GTTCCCCATC---  
-----TTCGTGTAATTCCCTTGCTACCTTGATGAATTT--C-----TTATTGACGGCTGTT---  
-----GGTATCTGCCGAGAAGCTCTAGGGCTTCTCTTTTCGGAAGAGAGCA---  
TCTGGGATAAGTGGCGAAAATGT-----TTTGGCATTCACTCTAAA-----  
-----CGCTC-----CGCT---  
GCGTGGCATA-----TTTGCAATTCTT-----GCGTTTACACCGATTGCTCT-  
-----  
-----CAAAAT-----CTT-----  
-----TTATCGCATATATTGGTGTA-----CGGGGTACC-----  
TAATATACTA--TATACCCAATACACCTGGTAGTGAC-----  
ATCTGTCCCTAGTCCCACACCTTT-----AG-----CGGCCCTCAGTA-----  
-----  
-----TAATATT  
>CLCRV\_AM501481  
-ACC-----GGATGGCCGC-----  
-----GCGATTTTTT-----  
-TGTGGGCCTTACCATTAACACTTGTCGGC---CAATCAT-ATGACTC-----  
-----CCTCAA-----AGCT--AAATAACGCTCCCGCACA--  
-----CTATAA-----GTACTIONGCGCACTAAGTT-----TCAAATTCAAAC---  
ATGTGGGACCCACTATTAACGAATTCCCTGAT-----ACGGTTCACGGGTTTCGGTGTATG--  
--CTTTCTGTGAAATA-----TTTGCAA-----CTTTTGTGCGCAGGATTATTCACC-----  
GGATACGCTTGGGTA-----CGAGTTAATACGGGAT-TTAATT-----  
TGTATTTTACGCTCCCCTAATT-----ATGTCGAAGCGAGC-----T-----  
GCCGATATC-----GTCATTTCTACGCCG-----CGTCGAA-----AGTA--CGCCGGCGTCTCAAC-----  
-----TTCGG-----CAGCCATA-----CGCGTGC--CGTGTGCTGCC-----  
-----  
-----CCCA----TTGTCCGCGTCAC---AAAACAACAGGCATGGACAAACAGGCCTAT-  
GAACAGGAAGCCAG-----GAT-----  
GTACAGGATGTACAG-----AAGTCCAGATGTTCTTA-----  
-----GAGGATGTGAAG-----GTCCATG-----TA-----  
-----AGGTTCACTCGTTTGTAGTCCAGACATG-----ATATTCAGCATATAGGTA-A---AGT-A---  
-----ATGTGTATTAG---TGATGTTACTCGTGGTACT-----GGGCTGACCCATAGAGT-----  
-----TGGTAA-----GAGATTT-----TGT--  
GTCAAGTCTG-----TTTATGTGTTGGGTAAGATA-----TGGATGGATGA-----  
-----GAACATTAAGA-----CGAAGAATCA-----  
-----CACGAATAGTGTGAT-----GTTTTTCTTGGTTAGAGATCGTAGACCTGTT-----  
-----GATAAA--CCTCAAGATT-----  
-----TTGGAGAGGTATTT-----AATATGTTT-----G-----  
-----ATA-----  
-----ATGAGCC-----CAGTACGGCGACT-----GTGAAGAATG--T-  
TCATCGTGACAGGTATCAA-----GTTCTGCGCA--AA-----  
--TGGTAT-----GCAACTG-----TCACCGGTGGACAATA-----  
-----CGCTTCAAAG-----

-----  
-----A-----ACAGGCTTTGGTCAAGAAGTTTG-----  
-----TCAGA---GTTAACAATT-----  
-----ATGTTGTTTACAATCAACA--G-----GAAGCAGGAAAAATACGAGAATCATAACG-----  
-----GAAAATGCGTTAATGC-----TTTATAT-----GGCTTGACTCA-----  
CGCTAGCAACCC-----TGT-----  
TTATG---CT-ACGTTG-----AAGATT-----AGGATA-TATTTTTATG-----  
-----ACTCTGTA-----ACGAATTGATA-----  
-----TTAATGAAGTTTGAATTTTA---TT-----  
TCTGAAT---ATTGAT-----CTACA-T-----ACAT-----  
AGTTTGTGGATTACATTG-----TAC-----  
AATACATGTTCTACAGCTTTAATAACTAAATTAATTGAAATTACACCG-----  
AGATTGTTTACAGATATTTGAGGACT-----TGGGTTTGAATACCCTTAAGAAAAGA----  
CCAGTCTGAGGCTGT-----AA-----GGTCGTCCAG--ATTCGGAATGTTAGAAA-----  
-----ACACTTGT-----GCAGTCCAGAGCTTTCCGAGT-----  
-----GTTGTAGTTGAACTGGATCCTGATCGTGAG-----  
TATGTCCATATTCGTCGT-----GAA--TGGACGGTTGACGTGGCTGATGATCTTGAATAAAAGGGAT-----  
TTGGAACCTCCCAGATATA-----TGCGC-----CATTCCCTGCTTGAGCTGCAGTGA-----  
-----TGGG--TTCCCCTG--TGCCTGAATCCA--TGGTTGTGGCAG--TTGATTG-----  
-----ACAGATAATAAGAACACCCG-----  
-----CAT--TCAAGATCTA-----  
-----  
CTCTCCTCCTCCT-GTTG-----  
CGCCTCTTCGCTTCCCTGTGCTGTACTTTGATTG-----GTACCTGAGT-----  
ACATGGGTCTATCAAGTGTGATGAAGATCGCATTTCTTTAAAGCCCAATTTTTTAGTGCAGAATTTCT-----  
TCTCTTCATCCAAAACTCTTTATA-GCTTGAATTGGGTCTGGATTGCAGAGGAAGATAGTGGGAATTCGCGCTTTA--  
-ATTTGAACTGGCTTCCCGTATTTTGTATTTGATTGCCAGTCTTTTGGGCC--CCCATGAACTCCTT-----A--  
AAGT--G-----  
CTTTAGGTAATGCGGGTCGACGTCATCAATGACGTTAAACCAGGCGTCATTACTGTATACCCTTGGGCTCAGATCTAG--  
--ATGTCCACACAGATAATTAT--GTGGACCTAA-----  
TGATCTGGCCACATCGTCTTCCCCTCCTACTGTACCCTCAATCAC-TACACTTATTGGTCTATT-----  
-----  
GGCC-----C-----  
-----GCGCAGCG-GCACTGAC-----G-----  
-----  
-----ACGTTCTCG---GCAG-CCCACACTTCAAGTTCTTCTGGAACCTTGATCGAAAGAA--G-----  
AAGAGGA--AAAAGGAGA---AACATAAGGAGCTGGTGGCTCCTGAAAG-ATTCTGTCTAGATTTGCATT--  
TAAATTATGAAA--TTGCAGTACAAAATCCTT-AGGAGCTAG-----TTCCTTAATGAC-TCTAAGAGCC--  
TCCGAT-----TTACTT-----CCCGCTTAAAG---TGCTGCGGC-GTAAGCGT---  
CATTGGCTGTC-----TGTTGTCTCCTCCTT-----  
-----GCTGACC--TCCGTCGATCTGAAATT-----GCCCCAG--TCGAGAATGTCC-  
CCGT-----CCTT--CTCGATGTAGGATTTG-  
ACGTC--GGAGCTGGATTTAGCTCCCTGTATGT-----TCGGATGGAA-----AT--  
GTGCTGACCTGCTTGGGGAGACCA-----  
AGTCGAAGAATCGCATATTTCTGGCACTTGAATTTCCCTTCGAACTGGATGAGAACATGCAAGTGAG-GAGTCCCATC---  
-----TTCGTGAAGCTCTCTGCAGATTCTAATATATTT---T-----TTTGGAGTTGGGGTT---  
-----TGTATATTTAATAATTGGGAAAAGTGCTTCCCTCTTTGGTGAGAGAACA---  
TTTGGGATAAGTGATGAAATAGT-----TTTGGAAATAAATACCGTT-----  
-----CCGCT-----TTGG--AGG--  
CATG-----TTGACTAAAATT-----GATCACCGATTGACCG-----  
-----  
-----CTC-----  
-----TTGCAACTCTCCCCGGTATAT-----CGGTGATCA-----ATATATAG-----  
TGATCACCAAATGGCATAATGGTAAT-----AAAAAAA-----CTTTAATTTGAAATTCAAA--  
CCAAAAGGCT-----AAAG-----CGGCCATCCGTT-----  
-----  
-----TAATATT

>ClGMV\_DQ641692

-ACC-----GGGTGGCCGC-----GGGTCTCTT---  
TAAAGTGGGTCCCACCTATTA AAA---CAAC---CAATCCGCATAGCT-----  
-----CCTCTG-----AGCT--  
TGTTAGTCAAAAAGGTGGC-----CTATAA-----ATGTTGACCAGTCATACT---  
----GGATTGTCAGACATGTGGGATCCATTGGTGAATGATTTTCTGAG-----  
ACCGTACATGGTCTTAGGTGTATG---CTAGCTGTCAAATA-----CCTGAAA-----  
TACGTTGAAAGTACGTATTC CCC-----TGATACACTCGGATA-----CGATCTAATCCGTGAT-  
CTGATA-----CTTGTTGTCCGTGCCAAAAATT-----ATGGCGAAGCGAGC-----C-----  
-----GGAGATATA-----ATCATTTCACACCCG-----CCTCAA-----GGTT---  
CGACGGAGGCTGAAC-----TTCGA-----CAGCCCGTA-----TCAGAAC---  
CGTGTGCCTGTC-----CTCA---CTGCCCCGAGGCAC---  
ACGAAAACAGTTATGGGCCAATCGGCCCAT-GTACAGGAAGCCCAG-----GAT-  
-----ATTTAAATTATATAG-----  
AGGCCTTGATGTGCCTC-----GTGGATGTGAAG-----  
GCCCATG-----TA-----AAGTCCAGTCATTTGAGCAACGCCATG-----  
-----ATGTGGCCCATGTAGGGA-A---GGT-C-----ATATGTATATC-----  
TGATGTTACACGTGGGAAT-----GGTATTACTCATCGCGT-----TGGTAA-  
-----ACGTTTT-----TGT--ATTAAGTCCG-----  
TATATGTTTTGGGCAAGGTC-----TGGATGGATGA-----  
AAACATCAAGG-----TCAAGAATCA-----  
CACGAATAGTGTAAT-----GTTTTTTGTTGTACGTGATCGAAGGCCGTAT-  
-GGTACC--CCTCAAGAAT-  
-----TTGGCCAAGTATTT-----AATACTTAT-----G-----  
-----ACA-----  
ACGAGCC-----AAGTACTGCTACT-----GTGAAGAATG--A-TCTCAGAGATAGATTTCAA-----  
-----GTGATCAGGA--AG-----TTCTAT-----  
GCAACTG-----TGACAGGTGGTCAGTA-----  
-----TGCCAGTAGAG-----  
-A-----ACAGACATTAGTCAGGAGATTCA-----  
-----TTAGA--GTTAATAATT-----  
ATGTTGTGTATAATCATCA--G-----GAGGCTGCTAAGTACGAGAATCATAACA-----  
-----GAGAATGCATTGTTGT-----TGTATAT-----GGCATGTACACA-----  
TGCCTCAAATCC-----TGT-  
GTATG--CT-ACGTTA-----AAAATA-----CGAATC-TATTTTTATG-----  
-----ATTCGGTA--ACAA--A-----  
-----TTAATAATATTTGAAATTCA--CC-----  
GAATGGT-----GGTCGA-----TTACA-T-----CAA-----  
AGTACCAGCTATTACATCA-----TAC-----  
AAAACATGTCTTACAGTCCTAATTGTTAATTGAAATAACCCCT-----  
AAACTATCTAAGTACTTCATACAT-----TCATTTTAAAGACTCTTAAAAATCTC-----  
CCAGTCGGTGGATTC-----AA-----ACGTGTGTAG--ATCCGAAAGGATAGGAA-----  
-----GCATTTGT-----GAAGTCCCAGTGCTCTCCGTAG-----  
-----GTTGTGGTTGAATTGTATCTGGATGGTGAT-----  
GATGTCGTGTGGTCGGAA-----CAT--TGGCCTGTCGAGGTGGCTGATGATTTTGAATATAGGGGAT-----  
TTGGAACCTCCCAGATAAA-----AACGC-----CACTCTCCGCTTGAGTTGCAGTGA-----  
-----TGAT--TTCCCCGG--TGCGTGAATCCA--TGGTTGTGGCAA--TTGATTG-----  
-----ATAAGAAAATATGAGCAGCCG-----CAC--TCCAAATCTA-----  
-----  
TCCTTCGTCGTCTACTA-----  
CGTTTTCTTGGCAATCTTGTGTTGGACCTTGATTG-----GTACTTGAAT-----  
AGAGAGGCTCTGTGAGTGTGACGAACCTCTGCATTTTTCAAAGCCCAAGTCTTTAGTGCGGATTGCT-----  
TTTCTTCATTTAAAAATTGAATATA-GCTGGCACCGGGCCCTGGATTGCAGAGAAAGATAGTGGGAATCCCACCTTTA--  
-ATTTGAACTGGCTTTCCGTATTTTGTATTGCTTTGCCAGTCTCTTTGGGCC--CCCATGAATTCCTT-----A--  
AAGT--G-----  
CTTTAAATAGTGGGGTTCGACATCATCAATGACGTTATACCATGCGTCATTACTGTAAACCTTGGGACTCAAGTCTAG--

--GTGACCACATAAATAATTAT--GTGGTCCAAG-----  
TGATCTGGCCACATTGTTTTCCCTGTTTCGACTATCGCCCTCAAGAAC-AATTGATTTAGGTCTTAA-----  
-----  
TGGC-----C-----  
-----GCGCAGCG-GCACTCAT-----C-----  
-----  
-----ACATTTTCT---GAAA-CCCAGAGTTCAAGTTCTTCTGGAAC TTGATTA AAAAGAA--G-----  
ATGAAAG--AAATGGGGA---CCTATAAATAGGCACCTCTTGTACAAAT-ATCCTATCTAAATTTGAATT--  
TAAATTGTGAAA--TTGTAAAATAAAATCCTT-AGGGGCTAA-----TTCTTTAATGAC-CTTAAGAGCT--  
TCGTGC-----TTACTG-----CCAGTGTTAAG---CGCCTGGGC-GTAAGCAT----  
CATTAGCTGTC-----TGTGGACCTCCTCGT-----  
-----GCAGATC--TCCCGTCGATCTGGAATT-----CTCCCAT--TCCAGTGTGTCC-  
CCGT-----CCTT--ATCCATATAGGACTTG-  
ACGTC--GGAACTCGATTTTGCCCTTGAATGT----TAGGATGGAA-----GT--  
GGGCTGATCTTGTGGGGATACCA-----  
GATCGAAGAATCGTTGATTCCTTGCAATTGGAATTTGCCCTCGAATTGCATAAGAACGTGGAGATGAG-GGCTCCCATC---  
-----TTCGTGGAGTTCTCTGCAAATCTTGATGAATTT--T-----TTATTGGTTGGTGTA---  
-----ACAATTGCCAGAAGTCTGGCAAGAGTTTCTTTCTTTTGTGAGTGAGCA---  
TTGTGGATAAGTGAGAAAATAAT-----TTTTGGCATTATTCTGAA-----  
-----TTTTG-----TTGG--  
AGGAGGCATG-----TTGACT--TG-----GT--CAACTGGTGTCTCG-  
-----  
-----CAAAC TGG-----  
-----GTGATATATATTGGTGTCT-----TGGGGTCTCT-----  
ATAAATACT---TAGACACCTAATGGCACATTCGTAAATATCTTACCCAC-----  
TTTTGAATTTGAATTTCAAATTTGAATTTAATTTTCGGCTCCAAAAG-----CGGCCACCCGTA-----  
-----  
-----TAATATT  
>CoGMV\_EU636712  
-ACC-----GTGCAGCAGC-----  
-----CAAAAATTTT-----  
-----T---CCGTA---C-----  
-----ACTTTAA-----TTTA--AAAT-----  
-----AAAATT-----GAAATTGATTGGCACTTT-----  
ACTTTATTTTAGATCTGGCCAATGATGAAACACGTGTT-GGGT-----  
CATTTTAGACGCTTTATCCTTAT--GACATAAGTTTCAATTT--TAT-----  
-----TTGAACTGTTTAGCGCTATAAATTTAAATTTGAATGAAATTCAAGTA-----  
CTGT---CAGTGTTAGAGTTCGAAAAGAAATGATGAAACGTGA-----G-----  
GCCCCATGG-----CGTACGAATGCTGGGA-----CCTCAA-----GGTA--CGTCGTTCTTTAAAT-----  
-----TTT-----TC-----GCCACGA--AGTGGATTGGGC-----  
-----  
-----CCTA---AA-----GCTACTGCTTGGGTAAATCGGCCCAT-  
GTATAGGAAGCCCAG-----GAT-----  
TTATCGAACGTACAG-----ATCACCTGATGTTCCAA-----  
-----AGGGCTGTGAAG-----GCCCTTG-----TA-----  
-----AGGTACAGTCATTTGAACAGCGTCACG-----ACATTTCTCATGTGCGGA-A---GGT-G---  
-----ATGTGTATATC-----CGATGTCACACGTGGTAAT-----GGTATTACACATCGTGT-----  
-----TGGTAA-----ACGTTTC-----TGT--  
ATTAAGTCTG-----TTTATATTCTAGGTAAAGTA-----TGGATGGACGA-----  
-----TAATATTA AAC-----TTAAGAACCA-----  
-----CACTAACAGTGTAT-----GTTCTGGTTAATAAGGGATAGGAGACCATAT-----  
-----GGTACT--CCCATGGATT-----  
-----TTGGACAGGTGTTT-----AACATGTAT-----G-----  
-----ATA-----  
-----ACGAGCC-----TAGTACCGCTACT-----ATCAAGAACG--A-  
TCTCCGTGATCGTTACCAG-----GTTTTGCATA--GG-----  
--TTTTGCG-----TCGAAGG-----TTACTGGTGGACAGTA-----  
-----TGCTAGCAACG-----  
-----A-----ACAGTCTCTTGTGAGACGATTCT-----



-----GGAAG---GTGAACAACC-----  
-----ATGTGGTGTACAACCATCA--A-----GAAGCTGCTAAGTACGATAATCACACT-----  
-----GAGAATGCATTATTAT-----TGTATAT-----GGCATGTACTCA-----  
TGCATCTAATCC-----TGT-  
GTATG---CT-ACGTTA-----AAGATA-----CGGATC-TACTTCTATG-----  
-----ATTCGATC-----TTAA-----A-----  
-----TTAATAAATATTGAATTTTA---TT-----  
ATATGAT---TTTGTT-----CTTCA-----  
---ACATGTACATAAACGAGCGTATCA-----  
GCAGCATGTGCAACCGCTCTAATTACATTGTTTATGCCAATGGCACCT-----  
AAATCATCTAAGTAACGTCTAATT-----CGGGAAGAAAATACTAGACAGAAA-----  
CTCGAAATCCTCCATCTGGA-----GGTCGTCAA--ACCCTGAAATTCAGGTA-----  
-----GCACTTGT-----GGAGCTGAAGTGCTTTCTGAG-----  
-----GTTGTGGTTGAATCTTATCTGCA-G--TAA-----TA-----  
GTAGGTGTCTCGCAC-CTAGATCTGTTGCCG---ATATTATCTTGAAATATAGGGGAT-----  
TTGGAACCCTCCAAGTAAA-----AACGG-----AACTCTCTGCCTGATATGCAGTGA-----  
-----TGGG---ATCCCCTG--TGCGTAAATCCA--TCGTCTCGGCAG--TGATGC-----  
----TCACATATATGGAGCAACCG-----  
-----CAG--TCCAGGTCAA-----  
-----  
TTCGTCTACGACGAATT-----  
ACTTTCTTCGAGTGCCGATGTCGATGCTTGATCG-----GCGGTATCAA-----  
AGAATGGCTCTTCGATGGTGACGAAGATGGCGTTTTTTTTTGGCCAGTCATAGATGGCGCTATTTT-----  
TTTCCTCCTCGAAGTACTCTTTATA-TGAAGAAGTAGGCCAGGATTGCAGAGGAAGATTGTTGGAATCCCTCCATTT--  
-ATTTGAATTGGTTTGCCGTACTTGCAGTTAGACTGCCAGTCTCTCTGGGCC--CCCATAAATTCCTT-----C--  
ATAT--G-----  
CTTTAGATAGTGCGGGTCGACGTCATCAATGACGTTGTACCAGGCTTCATTGGAGTAGACCTTTGGGCTTAGATCAAG--  
--ATGGCCACATAGATAGTTGT--GACGACCCAA-----  
ACTTCTGGCCATAATGTCTTTCTGTCTGATGGGCCTTCAATGAC-AATAGATATCGGCCTAAA-----  
-----  
AGGC-----C-----  
-----GCGCAGCG-GCATCCAT-----T-----  
-----  
-----ATATTATCG---TTAA-CCCACTGATTAATTACAGCAGGAACGTTATTAAGGAT--G-----  
ATAGTGG--GAACGGTGGCTCAAAAACATGAACTGGAGG---AGCAAAG-ATCCTCTCCAAATTTGGCGTT--  
AAGATTATGAAA--TTGACATACATAATCTTT-TGGAECTAA-----CTCCTTAATGAC-AGTAAGAGCC--  
TCGTCC-----TTACTT-----CCGCTGTTAAG---CGCCTTGC-ATAAGCCT---  
CATTAAATTGTC-----TGTTGACCGCCTCTC-----  
-----GCCGATC--TCCGTCCACCTGGAAAG-----TGCCCAT--TCGCAGAACACT-  
CCGT-----CTTT--TTCGATATATGATTTG-  
GCGTC--GGAGGAGGAGCGCGCAGTTTCAATGT-----GGCAGTGAA-----TT--  
GACGTGAGTTCTGTGGATGGGAGA-----  
GGTCAATAATCGACAATTTGTGCAGACGAATTTCTTCTGGAATTGAACCAGGGCATGCAAGTGAG-GTGACCCATC---  
-----TTGATGTTTTTCTCACATACCCTAATATAAAT--G-----ATATTTGTTGGAAGG---  
-----GCTAATGCTAATATTTGATGTATGGCTGACTCTTTAGTAACAGGGCA---  
TTTTTGCCACGTGAGGAAAAAAG-----AAACGCCTTGTTTCTTAAA-----  
-----ACGAC-----C--  
GCTCATCTTGCGTT-----T--TAAATCGGAGA-----CAATCAAAG--  
-----  
-----TCTCTGATATCC-----  
-----AA--TATATTGGAGACAAT-----TTATAGGTGTTCC---  
AATATTTGTAATA--AGAGCGTGCAGA-----GCCTTTTTTATACGGACGC-----  
-----  
GAAGGGCATTTTAGTCATTTATAAATAGTTTAGCGTGTTTTTTGGGTTCCAATCCTCTGCTGCTGCACGCTC-----  
-----  
-----CCATTATT-----  
>CpCAV\_JN989420  
-ACC-----CG-----CGAGTGCCT-----  
-----GGGCC-----

---CACGCGAGCACGATAG---TGCGAG-----CA-----AAAAGTTGA---AGA-----  
-----TAAGATGCTTTT-----GTCAT--  
GAGCCACTCTTA---GTG-CTATAT-----AAAGGTGATGTG-ATCTC-----TCC-----  
-ACTTTGAAAATGTATCCCGCCAAGTAC-----GTGGTGTATCCTTCA-----  
GAGAGTAATTACTCTTATACCCC-----TGTTGGTGGTGATTCTCTGATACTT-----CCTCAGGAA----  
GTTCTTCATC-----TGAAAATATTTTTT-----CGAAAGTTGTGGT-----  
----T-GCTCTTATAATTATT--TTATTTACTGTAGGTATAATTTAT-----  
TTAGCTTATACTCTTTTTTTAAAAGATTTA-----ATTCTTTTATTGAAGG-----CCAAGAAGCAGAGAACCA--  
-CAACTGAGATA-GGG-----TTTGG-----AAATACCCC-----T---GCA---  
CGA-----CCTAAT-----AGTCAGAG-----  
-----GCAACAAGATGTCGGGCCG-----  
-----GTATAAGGGACA-----GGTATACAGAA-----GGAAGAAG----GGGC--  
-----AGTATG-----C-AAAGGCGTATTC-----CGCACTTGGAG--  
TTAA-----TTCAAACGGGA-----GTTGGAG-----  
CAGTTAGTTAATCAAC-----CTGGGCG-----TCCTCTTCAATTAA-----  
GGCGCCAGCCCTG---CA---GGTTG-----CTGAATACCTG-----TGGACGTCCAATAAGGCG--  
-----GGTGTTACGTTTTCTCC-----TGGTGG-----TTCAACATTTT--  
-----TGTTCACTAATTTCC-----CTCAGGGTGCTAATGAAAAC-----  
-----TGCAGGCACAC-----TAACCGCACCA-----  
TCACTTACAAGATGG-CCATAAAGGCATG-----GGTTGCCTTGGAT-----  
GGCTCTATGGTTAAC---AGGGTGTGC-----AA--ATTTCCAGT--ATATTTCTGGTTAGTG-----  
-----TATGAC-----AAGAACCCTGGTGATAGTAA---TCCTG---  
GGCCCTCAGCCATATTT-----G-----  
-----ATA-----CTCTCTATCAAG-----ATCAGCC-----  
TGGTACATGGACT-----GTTACCCGCA---A-TGTTTGTACAGGTTTCGTT-----  
GTTAAAAACAATGGT-----CTGTGATGCTGGAAGCTA--ATGGA-----  
-----GTGGA-----  
TCCTAGTGTGAA-----  
-ACAAGGATCTACTTAC-----TA---TGGT-----CCTGGA-----CCTTGCTA-----  
----TGTTGGAGGCAGATGA--ACAAGTTTT-----GTACTGAGTGAAGAATTC--T-----  
TTAAGAGGCTCGGAGTTA-----  
TCCACAGGGGATGTTGCTGATATTAAA-----GAAGGAGCA-CTTTTAT-----  
--CT---TGTATGT-----GCTC-----CTGCAGGTGGT-----  
-----GC-----AACCGT-----T-AGGGTTG-----  
GGGGTAGATTT-----CGCATG-TATTTT-----AAATCAGTTG-----GAAA-----  
-----  
TCAATAAA-A-----AAATTA-----TTTAATATT--  
-----TTG-----ATG-----  
-----T-CATATTAT--TG--AGTAATAG--T-AG-----A-----  
---TAGG-AAATTACAA-----ATGTTTATT-----ACACA-----  
---ATTATA-----AAACAACCCCAAAT-----AAAACTA-----  
-----  
-----AATTACACACAAATCAAAT-----ACATTATA---TATTC-----  
-----T-CTGAAGGAGGAGAGGCACG-----  
-----TTGA-----GTGACTTG--ACGACGC-GCAGCAA-----  
TAAATGTTTCTCCCT--C-A-----GTCATGT-----  
-AATGAATTA-AA-----CAA---TTGGATTCAA-----  
-----  
-----AG---TATTCATTCTGAGAGGAAGACA-TGTCTTTGATCCAATCGTC-----  
-----AT-----  
CGTTATTTACTAATATAATAGTTGGGATACCTCCCTA---  
ACCCTTTTTTTTTTACCATATTTGGGTTACAGTAAAATCTTTCTGTGAA--CCTACTAATTGCTT-----C--  
CAATTTGGACAAAATTTAAATG---GT---ATATCATCAATTATGTTGAAGGTGGCGTTGGGGTCATAGG---TTG--  
-TGAAGTCGAT---TCCTCCGTTGAAGTAATTGT---GTCTCCGAG-----  
GCTTCTTGCCCAAGTTGTCTTACCGGTACGATTTGGTCCGCAGATGTA-GAGGGATCTTCTTCTGT----  
GTTGGAGTTGT-----TC-GGGTTCCTGGTGTA--TTCAT-CCA-----T-----  
CCA----AATTAGAT-----CTTCTGTT----GCAGT-----TTGTATA--

GATAAATTTGGATGAAG---TAAATGGTAAGATTCT-ACACTTAC-----  
-----  
-----CACGTAA-----AGGTCTCTG----TTAAG-CCACTCAGTAATTTCTTCATCA-----  
CATTGAAGAAATTCATT--TGGAATGGA--CTAGA-----GTAAGGAGGTTCAATATCTGGAAT-  
AGTTTATTTGCACTATATTC--TAGCCATTGGAG--TTTTGTGGCCCATTCATG-TGGAATTC-----  
AGTTTTAATCAT-TTCCAATAA--TCTTCT-----TTAGTTGTTGCA-----GTCTGAATAATAGTTCTCC---  
--ATCTGTCAT---CAGA---TTTT---GTTGGGAGACCTTG--TGTTTT---CTAAAG-----  
-----TCTCCTC--T---TGTGATGACACT---TCCA-----  
-----T-----CCTT--  
GGAGATGTAGTCAAGA-ACTTG---TTCAGAATTTTTAGCTGGTTGGATAT----TTGGATGGT-----  
---T-----TCCTTG-----AA-----  
AATCAAAAAAAGAAGGGTCACGTATATTGCTTCTTTTTGTCAAGTTGAAGCAGGCAGTGAAGATGGG-GAGTACCATC---  
-----TTGGTGAAGCTCAGTAGCAACAGCGATAAAGAA--A-----ATAGCAAAACGTGAA---  
-----AGTTTTTCCAGAGAAAGTCTCTAAGACTTTCGGCATCTGAGCTGCA---  
GCGAGGATAAGTAAGGAAGACAT-----ATTTTGTTTGAAGTCTGAA-----  
-----T---GAAGA-  
TGAGGGTTTTTTTTGTTG-----AGGCA-----TATTTTGG---CTC---AGAA--  
-----CAGTG-----TTT-----TG-----  
-----AAACTCTAT--CCT-----  
-----TTAC--TAG---CGAGTGAGCC-----AAATG--  
---AGCCA-CTCTG-----TTTTGTATTAA-----ATAATAGGCAA-----  
-----GGACCAATTCCTTGTGTCACG-----  
TG-----  
----GGG-----CGCACTCGCGGAA-AT-----TTAATGTT  
>CpCDV\_AM850136  
-ACC-----GG-----CGTG-GCCAC-----  
-----C-----TTAT-----  
----CGCGAGCACTTTAG---TGCGAG---CG-----G TTCAGATTTAAAG-----  
-----TGAAAAGTTCCC-----  
GCCCACTAGGGTTTGCTTTAGCTTTTGCTTTAT-----AAAAGGCGCACT-AATGG-----  
GTA-----GACCGTAGAATGGAACGTATTCTGTAT----CAGGTATTTCTTACG-----  
GATACGAATTATTCGTACGATCCTCCTCTGTGAATACGAATT-----CCCAGGGA-----  
TCCTC-----TCAAACGGATTTTCG-----GGAAGGTGGTTAT-----  
C-GCCTTGGTGGTTATT--CTGGTTAGTGTGGTGTGTTCTAT-----  
CTGGCTTATAGTCTGTTCTTGAAGGATTGT-----ATCCTTCTGTTCAAGG-----CGAAGAAGCAGAGGACCA--  
-CCACTGAAATC-GGG-----TTTGG-----TCAAACCCC-----G---GCT---  
AGA-----AACC-----AGGATCATCC-----  
-----TCAACCTTAGCGGGGGTGC-----  
-----ATC--ATGTCA-----ACTGTGACGTG-----GGGAAACA---AGAG--  
-----GAAGCG-----C-AGCGAT---A-----GGTCCTCGAAG-----  
-----G-----  
CGAAGAGTAAGTCCCTC-----TGGGTCTTATGTTCCCAGAT-CTGTGTCTTCCA-----  
GGAGGGAATCGTTG---CA---GGTGG-----CTACCTTTTCC-----TGGACAGTTCTGGTTTCG--  
-----GGTATCAAGTTCTCTAC-----TGGTGG-----TGCTGCCTACC--  
-----TTGTGAGTAATTTTC-----CACAGGGTGCCAACGATAAC-----  
-----TGTCGTCACAC-----CAACAAGACCG-----  
TGCTATACAAATTCA-TGGCCAAGAATAC-----GGTGTACTTGGAC-----  
---CCTAGTCATTATCCTAAGGTCTTT-----AA---GTGCCCGTT--TACTTTTTGGCTGGTG-----  
-----TACGAC-----AAGGCTCCTGGTGCAAGTGT---CCCTA---  
GTACTGGGGACATATTT-----G-----  
-----AAGGCCCTCTCTATTCCTG-----CTAATCC-----  
CTGGACGTGGACT-----GTGTCTAGGG---C-TGCTTGCCATCGATTTGTT-----  
GTTAAAAAACGTGGT-----CAGTGGTGGTGGAGAGCA--ATGGT-----  
-----GTTGA-----  
TCCAGGAAAGGC-----  
-CCAATCCAGTTCTAT-----TA---TGGG-----CCTGGA-----CCTTGTA-----  
----TCAGATTAAGTCTGCA--ATAAGTTCT-----  
----TTAAGAGGCTGGGTGTGT-----CAACGGAGTGAAAAATAG--T-----  
TCCACGGGGGATGTTGGTGTATATAAAG-----  
-----GAAGGAGCC-CTTTAC-----

--AT--TG TAGGT-----GCTC-----CTTCCCAGAAG-----  
-----TC-----TGATGT-----A-TATGTAA-----  
ATGGTTATTTTC-----CGAGTG-TACTTC-----AAGTCCGTTG-----GCAA-----  
-----  
TCAATAAA-----AATTTA-----T-----TATT-----  
-----ATG-----AA-----  
-----TATTTTAC--AT--TGTGCAAG--T--AG-----G-----  
-----TAGA-AATTCAATA-----TGTTACATT-----  
ACACACGAAATAAGCAAA-----AAAACACACCTAAA-----ACAAAAGT-----  
-----ACACTACCCACGATAACTTA-----  
TAACTATAGCTTAACC-----C--CGTATGAGGAGAGGCACG-----  
-----TTCA-----GTGACTCG--ACGATTCCCGGGCAA-----  
-----AAAAAGTTTCGCCGT--C-A-----TCCATAT-----  
-----AATGGATCT-CA-----  
-----CAA--TTGTCTGTAA-----  
-----  
-----AG--TATTCTTTCTGATGCTCAGACA--  
TAGCAGGGATCCAGTCCTC-----AT-----  
CTCTATTTGTTAAAAATTATGGAAGGGACACCACCTTTT---  
ATTTTCTTCTTTTTCATACTTAGGGTTGACAGTGAAGTCGAACTGGCAA--CCTATTAATTGCTT-----C--  
CACAATGGGACGAACTTGAAGG---GG---ATGTCGTCATGACATTTGTAGGTCGCGTGTTCGTCGTACG---TGG--  
-TGAAGTCGAT---GGTCCCATTCCAGTAGTTGT---GTCGTCCGAG-----  
GCTTCTAGCCCAGGTGGTCTTTCCGGTACGAGTTGGTCCGAGATGTA-GAGGCTGGGGACTCTA-----  
GCTCCAGTCCT-----TCTCGTTTCTGGTTAG--ATCGG-CCA-----T-----  
CCA-----TTCAAGGT-----C--AGAT-----TGAGC-----TTGCTGA--  
TATGAAACTGGATGGAC---AAGAGTGTAGGCGTCG-ATGCTTAC-----  
-----  
-----TTGGTAC-----AGGTGTGTA----TCCCT-CCATTGTGCTAGATCCTCGTGG-----  
CAGCGGAGATCTGACTCAGTGAACGGCGA--CACATATGC---TTCAGGTTGTGG-----AGGGAAT--  
AGCTTGTTTGCGGAGTATTC--AAGCCATTGAAG--CTTGGTAGTCCATTCATG-GGGGAACTC-----  
CTCCTTGATCAT-GTCAAGATAT--TCCTCC-----TTAGACGTTGCA-----GTCTGGATAATAGTTCCGC--  
--ATCGTGCGT---CAGA---TTTG---CGAGGAGAGACTTTA--TGATCT---CTGAAA-----  
-----TCTCCTC--T-----TGTTTTAATATC-----TCCG-----  
-----T-----CCTT--  
GGAAATGTATTCAAGG-ACTTG---TTTAGAGTTTCTAGCTGGTTGGATAT----TAGGGTGAT-----  
---T-----TCCTTC-----AA-----  
AATCGAAAAAAGAAGGATCCCTAATCCAAGGTTTTTTATCAAGCTGGACAAGAGCATGATAGTGGG-TAGTGCCATC---  
-----TTGATGAAGCTCAGTAGCAACACCAAGGAAGAA--A-----ATAAGAAAAGGTGTG---  
-----AGTTTCTCCAGAGAAACTCGAATAAATCATCTCTTGAGATGAGCA---  
TTTAGGGTAGGTAAGGAAAACAT-----ATTTTGATTGGAATCTGAA-----  
-----  
-----GTTCTTGTTCGAGAAGGCATAT-----TTGTTGTGA----CTC-----CAAG-----  
-----GGTTG-----GCT-----TG-----  
-----AAACTCTAT--CTT-----  
-----ATAAC--CGG---CGTG-GAGACT-----TGGAG-----  
ACAAGGGTATT-----TTGGTCATTTA-----GG-----C-----  
-----TGGGTAGTGAATAATGACATGGCAGTGAAGTAAAGACGAAGTCTTTGCG-----  
-----  
AAAGCGAATAAGGGGGG-----AGC-CACGCCGAA-A-----TTAATATT  
>CpCV\_GU256530  
-ACC-----CG-----CGAGTGCCC-----GGCCC-----  
---CACGCGAGCACGTTAG---TGCGAG-----CG-----ATATCGCGA---GGAAA-----  
-----AAGCAAAAATCCTCGTG-----AGG--AT--AAGT-----  
-TA---GTG-CTATAT-----AAAGGTGATGTG-ACATA-----AAG-----  
GTGTGAAAAATGTTAGGCGCCTACTAT----CAAATATTCCTTCT-----  
GAGGAAAATTACTCTTATACCCC-----TGTTGAGACGCAGGAGTCTTTTCTG-----GCGC-  
GAAAGCAGGTGATTCATC-----CGAGCACGATTTTT-----CGAAAGTCGTTCGT-----

-----T-GCTTTAATTATTATT--CTTTTTTCAGTGGGAATCATTAT-----  
CTTGCCTATTCTTTATTTTTAAAAGATTTG-----ATATTATTATTAAAG-----CGAAAAAGCAGAGGACGA--  
-CGACTGAGATA-GGG-----TTTGG-----TAATACCC-----T---GGT---  
AGA-----CCCGGT-----TCTCAACC-----  
-----TCAGCAAATGTCCGGGCC-----  
-----ATTTAAGGGACA-----AGTGTACAGCA-----GAAAAGG-----GGTC-  
-----GTAATG-----C-AAAGGCGTATCA-----GGCTCTGGGAG--  
TTAA-----ATCTCAACGGGA-----GTTGGAG-----  
CAGTTAGTTAACCAAC-----CAGGACG-----TCCTATTGGTAATA-----  
GGCGTCCGTCCTG---CA---GGTCG-----CAGAGTATCTG-----TGGACGACCAACAAGGCT--  
-----GGTGTGACGTTCTCGCC-----TGGTGG-----GGGAAC TTATT-  
-----TGTTCACTAATTACC-----CTCAAGGGGCGAACGAGAAC-----  
-----TGCAGGCACAC-----TAACCGGACCA-----  
TAACGTACAAGATGG-CTATCAAGTGTG-----GGTGCCTTGGAT-----  
GGGTCTATGGTGGCT---AGGGTTGCA-----AA---GTTTCCAGT---CCACTTCTGGTTAGTG-----  
-----TACGAC-----AAGAACCCTGGTGATACGAA---TCCTT---  
CTCCATCGGCTATTTTT-----G-----  
-----ATA-----GTCTCTATCAAG-----ATCAGCC-----  
TGGGACTTGGACT-----GTAACGAGGA---A-TGTGTGTCATAGGTTTGT-----  
GTTAAAAAGTCTTGGT-----CCGTGATGCTGGAGTCTA---ATGGG-----  
-----ATTGA-----  
TCCCAGTAAGTC-----  
-TCAGTCCACATCATAT-----TA---TGGG-----CCTGGG-----CCTTGTTA-----  
---TAATTGGAGGCACATGA---CCAAATTT-----  
---TTAAACGTTTAGGAGTTA-----GTACTGAGTGAAGAATTC---T-----  
TCCACTGGTGATGTTGCTGATATTAAG-----  
-----GAAGGAGCA-CTATAC-----  
--CT---TGTATGT-----GCTC-----CTGGTGGTGGT-----  
-----GT-----TACTGT-----A-AGAGTTG-----  
GCGGTAGATTC-----CGCATG-TATTC-----AAATCCGTTG-----GCAA-----  
-----  
TCAATAAA-A-----ATGTTG-----T---TATT--  
-----TTG---ATT-----  
-----T-CATATTAA---TG---AGCTTCAG---T---GT-----A-----  
---GAGA-AATTCAAAT-----CGTATTAAT-----  
AAAAACCCG---GAATACA-----AAAACACACGAAAA-----GGAAAAA-----  
-----  
-----AGACACCTTACAATAATTAC-----ACTCTATA---  
TACCC-----T-CCT-ATGAGGAGAGGCACG-----  
-----TTCA-----GTGACTCG-ACGATTCAGGAGCAA-----  
TAAATGTCT-CGCCG---CTA-----TACATAT-----  
-AATGGATCT-TG-----  
-----CAG---TTGGATTCAA-----  
-----  
-----AG---TATTCCTTCTGAGAGGAAGACA-TATCTAATAACCAGTCGTC-----  
-----GT-----  
CATTATTAAC TAATAATACATGGTATTCCTTTG---  
ATCCTCTTCTTTTGGCGTATTTGGATTTACGGTGAAGTCCTTCTGGGAA---CCCACTAGTTGCTT-----C--  
CAGTTTGGGCAGAACTTGAAGG---GG---ATGTCGTCGACGATATTTAGGTGGCGTTAATGTCGTACG---TGG--  
-TGAAGTCCAC---TCCTCCGTTGAAGTAGTTGT---GTCTGCCGAG-----  
ACTGCGGGCCAGCTGGTCTTTCCGGTACGAGTTGGTCCGAGATGTA-GAGGGAGTTCCTTCGGT-----  
GTTGGAGTTGT-----TC-GGGTTCCTGGTAAA---ATGAT-CCA-----T-----  
CCA-----TATCAAAT-----CTTCAGTT---GCTGT-----TTGGTAA--  
TTGATATTTGGATGAAT---TAAAGTGTAAGCATCG-ACGCTTAC-----  
-----  
-----CACGTAC-----AGGTCTCTG---TTCAG-CCACTCCTGTATTTCTTCGTGG-----  
CACTGAAGA-----TCAATGGGGGAGAA---GGGGT---T---TTCATATGGAGGCTCTATATCTGGGAAC-  
AGTTTATTGGCGCTATATTC---AAGCCATTGTAG---TTTGGTCGCCCATTCATG-AGGGAAC TG-----  
ATCCCTAATCAT-TCTCAAATAC---TCCTCC-----TTAGTTGTTGCA-----GTCTGGATAATAGTTCGCC---

--ATCGTTCAT----CATG----TTTA----GTTGGGGAGACCTTG---TGTTTT----CGAAAG-----  
-----TCTCCTC--T-----CGTGATGACGTT-----TCCA-----  
-----T-----CCTT--  
TGATATGTAATCAAGG-AC TTG--TTCAGAATTTTTAGCTGGTTGGATAT----TTGGATGGT-----  
----T-----TCCTTC-----AA-----  
AATCAAAAAAAGAAGGGTACGTATATCCCCCTTTTTATCAAGCTGAAGAAGACAGTGAAGATGGG-GAGTACCATC---  
-----TTGATGGAGCTCAGTAGCAACAGCAATAAAGAA--A-----ATAGCAAAACGTGAG---  
-----AGTTTTTCCCAGAGAAAGTCTCTGAGGCTTGTTGCAGTAGAGCTGCA---  
ATGGGGATAAGTAAGAAAAACAT-----ATTTGGTTTGTAGACGGAA-----  
-----  
GTTGTTTTGTGCGTTTTGAAGAA--GAAGGCA-----TTATTTAGGCTTTCCCTC-----A-AA---  
-----CAGTG-----TTT-----TGC-----  
-----AAACTCTA--TCT-----  
-----TAAC--CAG--CGAGTGAGGA-----AAATG---  
--AGGAAGGGGAG-----TGAGGTATTTA-----T-TTGAATGG--A-----  
-----GGCGAATAGCCCCTGACACG-----TG-----  
-----  
--GGG-----CGCACTCGCGG-A-AT-----TTAATGTT  
>CpRV\_GU256532  
-ACA-----GC-----AACGCGCCC-----  
-----GGCCA-  
ATAGCGAGCGCGCTCAGCGCGCGAG---CGTAAG-----  
CAGACAAAACCCGACAAAAGTTAGTGGATGAAA-----  
AAGTAAAGTTGATGTTG-----A---CAT--AAAGTAAAGTGTGAACGCCTTTAAAT-----  
-----AGAGACCACTTG-TTTTC-----CCG-----CCAAAAGCGATGAGAGAGAAAAAGTAT-----  
CAGATATTTCCCTCCG-----AACCTAATTACTCTGAATTTTCCCCTCCTGTGGAAA-----  
TTTCTC----ACGGTGAAA-----ACTCTCA-----GGTTAA--TTTCC-----  
AGCGAGTAGTAAC-----T-GCTTTAATTGTAGTA--CTCGTGGCTGTAGGAGTATTGTAT-----  
-TTGGCGTATACCCCTTTTATTAAAGACTGT-----ATTTTACTGTTTAAAG-----CGAAAAAGCAGCGAACAA-  
--CGACGGAAATT-GGG-----TTTGG-----ACAAACCCC-----T--GGT---  
AGA-----AGCAGCG-----ATCGTCCTCC-----  
-----TCAGCC-----  
-----TTAGGGGAA-----ACAGTATGCCA-----GGGACGTG-----GGGT---  
-----GGTAAG-----A-AGAAGC-----GGAG--  
TGAA-----CGGAAGGTTG-----TTCCGAA-----  
CTCCAAGT--ATGCTT-----CTGGTCGTATTCCCCGTAATCCCTCTGCTAAGA-----GG---  
GACGCACTT--CA---GGTGG-----CTACCTTTTCC-----TGGACCAGTTCAGGTTCC-----  
-GGAGTTAAGTTTAGTGC-----TGGTGG-----GGGTGTTTTTC-----  
--TGTCGTCACAC-----CAACTCCACTA-----TCACCTACAAGTTGA-  
TGACCAAGAATAC-----CGTGTCTTGGAT-----AGTTCA--  
GTTTGGCCG-TTGGTATGT-----AG--GGTCCGGT--GGTGTCTGGTTGGTG-----  
-----TACGAC-----AAGTTTCCAGGTGCTTCATT--ACCCA-----  
GTACTGGGGATATATTT-----G-----  
-----ATGGTCCTGTCCCATTCAAAA-----ACAATCC-----  
TTGGGTCTGGACT-----GTTTCAAGGG---C-TGTGTGTCACAGGTTCTGTG-----  
GTGAAGAAGACCTGGA-----CTGTGATTCTTGAGTCTA--ATGGA-----  
-----GTTGA-----  
CCCAACAAAGAA-----  
-GCAGTCATCCAGTTAC-----TA--TGGC-----CCAGGC-----CCATGTAA-----  
-----CCAGTGGCGTGTATCTA--ATAAATTTT-----  
-----TTAAACGTTTAGGTGTTA-----GTACTGAGTGGAAGAAGCTC--T-----  
TCCACCGGAGACGTAGGTGACATAAAA-----GAAGGGCG-TTGTAC-----  
--AT--AGTAGTA-----GCCC-----CTTCCCAGAGT-----  
-----TG-----TGATGT-----T-TATGTTA-----  
ATGGTTATTTT-----CGAGTG-TATTTT-----AAGTCCGTTG-----GAAA-----  
-----  
TCAATAAA-A-----TTATTA-----TTC--TGTT--  
-----ATG--ATT-----

-----TGCATATTAT--TG--AACACGAA---T--TG-----A-----  
-----AAGA-AAATGAATT-----T--ATTAAT-----  
GACAACCGG-----AAATTACATGAAAA-----AGATAATAAACAGT-  
-----AACACCCACAAACAAATT-----ACACTATA--  
CATAC-----CCTCCACGGAGGAGAGGCACG-----  
-----TTCA-----GTGACTCG--ACGACACAGGAGCAA-----  
TAAACGTCTCTCCTT--C-G-----TCCATGT-----  
-AATGGATCA-TA-----CAG--TTGTGTTGAA-----  
-----AG---TATTCTTTCTGATGTGAAGACA-TATCTTTCATCCAATCATC-----  
-----AT-----  
CATTATTAACATAAGATTATACATGGAACCCCTCCCTTT---  
ATTCTTCTTTTTTTTGGCGTACTTAGGGTTCACAGTGAATCCAAGTGTGAA--CCCACTAATTGTTT-----C--  
CAGTTCGGGCAGAACTTGAATG---GG---ATGTCGTCGATGATGTTGTATGCTGCCTGTTTCGTCTAGG---TTG--  
-TGAAGTCCAC---TCCTCCGTTGAAGTAGTGT---GCCTCCCGAG-----  
AGACCTTGCCAGGATGCTTTTCTGTTCTGGTTGGTCCACATATGTA-GAGGGACTTCTTCTAT---  
GTCTGAGTTGT-----TC-GGGTTCCTGGTGTA--ATGGT-CCA-----T-----  
CCA---AATAAGGT-----CTTCAGTT---GCAGT-----TTGAGTG--  
TTTAAATTTGGATGTAT--AAGAGTGTAAGCTTCG-ACGCTTAC-----  
-----CAGGTAC-----AGGTCTCTG---TTTAG-CCAGTCTTGTATTTCTTCTCGTGG-----  
CATTGAAGGGAGGCCTC--TGGGAATGGA--C-----T---CTGGTATGGAGGCTCTACATCAGGGAAT-  
AGCTTATTGGCGCTGTATTC--AAACCATTGAAG--CTTTGAGGCCATTCATG-TGGGAATTG-----  
GTCTCTTATCAT-TCCCAGATAG--TGTTCC-----TTAGACGTTGCA-----GTGTTGATGATAGTTCTCC---  
--ATCGCTCAT---CATG---TTTT---GTGGGGGAGACTCTG---TGTTTT---TTGAAC-----  
-----TCCCCCT--T-----GGTGATGATGTT---TCCG-----  
-----T-----CCTT--  
AGATATATAGTCAAGG-ACTTG--TTCAGAATTTCTAGCTGGTTGTATAT----TAGGGTGGT-----  
-----T-----TCCCTC-----AA-----  
AATCAAAAAAAGAAGCATCAGATATGTTAGGTTTATTAGTAAGCTGGATAAGACAGTGAAGATGGG-GAGAACCATC---  
-----TTGATGAACTTCAAGCAACAGCAATAAAAAA--A-----ATAATAAACGTGTA---  
-----AGTTTTTCCCAGAGGTAATCTCGTAGAGCCTCTGGGTTTGGAGTTGCA---  
ATGAGGATAAGTAAGGAAGACAT-----ATTTAGATTGAAAACGGAA-----  
-----GTT-  
TGAGGTTTTTTTTGTTAAGACG-----AGGCA-----TGTTAT-----CCC-----TAAT--  
-----GAATG-----TTTGCTCTGCACTGTAG-----ACAC-----  
-----AACTCTAT--ACC-----  
-----TTATAACAG---CAATGGAGTTG-----GAGCG---  
---AGCAAAATATA-----TAGAGGAGC-----G-----  
-----CAGCGAACCAGAAACTTACAG-----  
TGGC-----  
TGCGGTATTGGGCCGGG-----CTCCGTCGCTAA-----TTAATGTT  
>CpYDV\_KM377674  
-ACC-----AG-----TGAGTGCCT-----  
-----CTGGCC-----  
---CACGCGAGCGCGTTAG---CGCGAG-----CG-----GATTGGTTC---TCGCA---  
-----AAG-TAGAATC-----TCAT--  
GAGTGGATTATC--TTGTCTATAT-----AAAGGTGCTGCC-TTTAA-----TAA-----  
-TTTTCAAAGATGCTTCCCCTAAATAC-----CAAGTCTTTCCT-----  
GGAGAAAATTACTCTTATACCCCAACTTTCGCGGGAAGTTATCAGGAAGTGCCTA----CCTCACATA-----  
ATTCTTC-----TGGTGAGACTTTTA-----ACAAAGTCTTTGT-----  
-T-GCCCTTATAGTTATA--TTAATTTCCGTGGTGTCTGTTAT-----  
TTGGCTTACGTAATTCGTTAAGGATCTT-----ATTCTTCTATGAAGG-----CTAAAAACAAAGGACTA--  
-CAACAGAGATA-GGA-----TTTGG-----TAACACTCC-----A---GGT---  
AGA-----CCTAAC-----AGTCGAAG-----  
-----ACAAGAGGATGCCGGGACC-----  
-----GTTTAGTGTTAA-----AACCTATTCAA-----GGAAGAAG-----GGTA-

-----AATATG-----C--CAAGGCCTACAA-----AGCTCTTGGTG--  
TGAA-----AAATCAAAAAGA-----ACTGGAA-----  
GAGCTGGTAAATGCGC-----CTGCTTG-----TCCAGTTACTCCTA-----GA---  
CCTGCCTTA---CA---GGTTG-----CTGAATATTTT-----TGGACTACGGACAAAAT-----  
-GGAATGATATTCCGCTC-----TGTTGG-----TGGTACTGCTC-----  
-----ATTTCACTATGTATC-----CTCAGGGTTCAAATGAGAAT-----  
--TGCAGACATTC-----CAACCAGACTA-----ATACCTACAAGATGG-  
CTATTAAGTGCTG-----GGTTGCATTGGAT-----  
CCTACGTTCTACAAGAAGGTGGCA-----TG---TGTTCTGT---GCATTTCTGGTTGGTA-----  
-----TACGAC-----AAAGATCCGGGTAATACACT---GCCTG---  
GATGCTCTACCATTTTT---G-----  
-----ATA-----CTCTGTATCAAG---ATTACCC-----  
GGGTACATGGACT-----GTATCCCGGA---A-CGTTAGTCGTCGCTTTGTA-----  
GTTAAAAAACATTGGC-----ACATTATCTTGGCCTCTA---ATGGA-----  
-----ACGAA-----  
TCCAACACAAGA-----  
-TCAAGACCCTGCTAAG-----TATGCTGGA-----CCTGGA-----CCTGTGTT-----  
----TCAATGGAAACACATGA--ACAAGTTTT-----  
----TTAAAAGACTTGGCGTAA-----GGACTGATTGGAAGAACTC--A-----  
GCTACAGGTGAAGTAGCTGACATTAAG-----  
-----AGTGGAGCA-TTGTAC-----  
--TT--AGTTTGT-----GCAC-----CAAGTGGTGGT-----  
-----GC---TGTTGT---A-AGGGTTG-----  
GGGGTAGATTC-----AGAATG-TACTTC-----AAATCCGTTG-----GAAA---  
-----  
TCAATAAATT-----ATTTTA-----T---TATT-----  
-----TTG---T-----  
-----A-CATATTCT--TA--TCTTACAA--T--AT-----  
-----GA-CCTTGAAA-----AAT-----AAATAC-----  
-----ATAAC-----AAAAACACGCAAA-----AAATGAAC-----  
-----AAAAACAGAAAACAAACTT-----ATATTATA--AACTC-----  
-----TGAGTCAGAAGGAGAGGCACG-----  
-----TTTA---GTGACTCG--ACGCTGCCGAAGCAA-----  
TAAAAGTCTCTCCTT--C-A-----CTCATTA-----  
-TATGGATTT-TA-----CAA---TTTAAATAAA-----  
-----  
-----AA---TATTCTCTCTGAGAATCTGACA-TACTCTCAAGCCAGTCCTC-----  
-----AT-----  
CATTATTAACATATTATAATACATGGGATTCCTCCTTTA---  
ACCCTCTTCTTTTTGCCGTATTTAGGGTTAACTGTGAAATCCTTCTGTGAC--CCTACTAACTGCTT-----C--  
CAGTTGGGGCAGAAGTTGAAGG---GG---ATGTCGTCGATGACGTTGTATGTTGCGTTGACGTCGTATG---TAG--  
-TGAAATCGAC---CCCTCCGTTGAAGTAGTGT---GTCTTCCCAG-----  
ACTTCTGGCCCAACTGGTCTTTCCGGTACGACTTGGTCCGCAGATGTA-GAGGGATCTTCGCCGGA---  
GTTGGAGTTGT-----TC-GGGTTCCTGGTATA--ATCGT-CCA-----T-----  
CCA---AATCAAGT-----CTTCAGTT---GCAGT-----TTCTAAA--  
GAAAGATGTGGATGGAG---TAGTTGATAAGAATCT-ACACTTAC-----  
-----  
-----AACATAG-----AGGTCTCTG---TTAAG-CCACTCAGTAATTTCTTCATGG-----  
CAGTGAAGAAATTCATC--TGAAATGGG--C-----T---TTGATAGGGTGGTTCTATATCTGGAAAG-  
AGTTTGCTTGCACTGTATTC--AAGCCAGTGAAG--CTTAGTTGCCATTCATG-GGGGAATTC-----  
TTGTTTAATCAT-TTCCAGATAC--TCCTCT-----TTAGATGTTGCA-----GTCTGTATGATAGTTCTCC---  
--ATCGTTCAT---CAGA---TTTG---GTTGGGCTGACTCGA---TGTTTT---CTGAAG-----  
-----TCACCTC--T-----GGTGATGATGTT-----CCC-----  
-----T-----CCTT--  
GGATATGTATTCAAGA-ACCTG---CTTTGAGTTCCTTAGCAGGTTGGATAT-----TTGGATGGT-----  
-----T-----TCCCTC-----AA-----  
AATCAAAAAGAAGGGTCCCGTATATCACATCTTTTGTCAAGCTGTATAAGACAGTGAAGATGGG-GAGAACCATC---



-----TTGGTGAAGTTCAGTAGCAATAGCAATGAAAAA---A-----ATAGCAAGAGATGTG---  
-----AGTTTGGACCAGAGAAAATCTCTGAGATTTTCTGCAGTAGAGGAGCT---  
ATGAGGATAAGTAAGGAAAACAT-----ATTTTGTGTTGAAGTCTGAA-----  
-----AGAGT-  
TGTTGTTTGTACGTCTTG-----GCA-----TGGTTC-----CTC-----AAAA---  
-----CAGTG-----TTT-----CGA-----  
-----AAACTCTA---TCT-----  
-----TAAC---CAG---TGAGTGAGGA-----AAATG---  
---AGGAACATATA-----TAGAGAGGTAA-----T-----T-----  
-----GGGCCTGTTGGGC-CTGACACG-----  
TG-----  
---GGC-----CGCACTCACTGAA-CT-----TTAATATT  
>CpYV\_JN989439  
-ACC-----AG-----TGAGTGCTTTA-----  
-----C-----ACGTGT-----  
-----CGCGAGC-CGATAG-----GCGAG-----CG-----TAAAGGTTACTTTTGAAA-----  
-----AAGGAAGATTCCC-----GCCCAAT--  
AATTCAATTATA---A-----ATAG-----ACGGGTGTTTTG-GCATG-----TAG-----  
-TGATGGCAAGGGGA-----AAATAC-----CAAATATACCCTCCG-----GTGGAAGATCATT-----  
TCCC-----AGAAGTGTCTCGCAGGTTTCTT-----CTCCTGGTG---GACATTCTAC-----AGTTGA-  
--TTTTG-----GTAAGGTTGTTGT-----C-GTGCTGATTGTGATA--  
CTTGTCGTAGTGGGTTTGTGTAT-----CTGTCTTATTTCGTTGTTTCATTAAGATTGT-----  
ATTTTGCTTTTTAAAG-----CGAAAAAGCAGAGAACAA--CCACCGAAATC-GGG-----  
TTTGG-----AAACACCCC-----T--GCT--CGA-----  
-----GGTAGCT-----CAGATCCTCC-----  
-----TCACCCTTAGGTCAAGCAC-----TATGAATAC-----  
TTCGTGGGGAA-----GGAAGAGA---ACCC-----GTACTG-----G---  
ATGGAATAAAG-----GGAA--GGCG--TCAA-----  
-----ATCAGAAACAG-----GGTG-----CCAATAATAGAAGGA-----  
-----CAGCTCC-----CCCTCCTGTTCCAA-----GGAGGGATTTCGCTA--CA--GGTGG-----  
-----CTACGTTTAGT-----TGGACCAGTACAGGGGCA-----GGTATAAAGTTTTCTCC-----  
-----TGTTGG-----GTCTGTTTATT-----  
TGATAAACACTTATC-----CACAGGGAGCGAATGACAAT-----TGTCGTCACAC-----  
-----CAACAGCACCT-----TGACGTACAAGTTGA-TGACTAAAAATAC-----  
-----TGTATTTTTGGAT-----G--CCAATTTTTGGCCGTATGTTTGTA-----  
--AA--ATACCTGTG--GTATTT-TGGTTGGTG-----TACGAC-----  
-----AAGTCACCAGGGGCTTCTGT--ACCTA--ACACAGGTGATATATTT-----  
G-----  
ATGGGACGTCTATTTTTAAGA---ACAATCC-----TAGTGTGTGGACA-----GTGTCCAGAG--  
-C-TGTCTGTCATAGGTTTGT-----GTGAAGAAGACCTGGA-----  
---CAGTCATATTGGAGGCCA--ATGGT-----GTTGA-----  
-----TCCAACCAAGAA-----  
-----GGTGTACAGCTAGTTAT-----TA--TGGT-----  
--CCGGGG-----CCTTGCAA-----CCAGTGAAGTCGTCAA--ATAAGTTTT-----  
-----TCAAGAGACTTGGTGTCT-----  
-----CAACTGAATGGAAAAATAG--T-----GCTAGTGGGGATGTGGCAGACATAAAA-----  
-----GAAGGTGCA-CTCTAT-----AT--TGTTTGT-----GCAC-----  
---CTTCTCAGGGT-----TT-----  
TGATAT-----A-TATGTAA-----ATGGTTATTTCT-----CGAGTG-TACTTT-----  
-----AAGTCTGTTG-----GTAA-----  
-----TCAATAAAAA-----  
CATTTA-----TTTAATGTT-----TAG-----  
--ATG-----T-CATATTTA--TG--AGCTTCAA--  
-T--AT-----A-----GAGA-AATTTTATT-----C--  
ATTAAT-----AAATC-----ACACT-----  
CAAATACATTACAA-----ACTTTTACAACAAA-----  
-----  
ATTAACAACCCAGTACATTA-----ATCTTATA--TTCCC-----T--  
CGATTGAGGAGAGGCACG-----TTTA-----

GTGACTCG--ACGATTGAAGAGCAA-----TAAATGTTTCCCCCT--C-T-----  
-----TCCATGT-----AATGAATAC-AA-----  
-----CAA---TTAGCTTGAA-----  
-----AG---  
TAATCATTTTGGAGCTGGGGACA-TATCGTTCATCCAATCATC-----  
----AT-----CATTATTGACTAATATTATACATGGTATTTCCCCCTTTG---  
ATCCTTCTTTTTTCCCATATTTAGGATTCACAGTCAAATCTAACTGTGAA--CCTATTAATTGTTT-----C--  
CAGTTGGGACAGAATTTAAAGG---GG---ATATCATCTATTATATATATGTTGCTAAGGGGTTGTAGG---TGG--  
-TGAAGTCAAC---TCCTCCGTTGAAGTAGTTGT--GCAGTCCGAG-----  
GCTTCTGGCCCAACTGGTCTTCCCTGTTCTTGTGGTCCACATATGTA-GAGACTTCTTCTTCGGT----  
GTCTGAGCTGC-----TC-TGGTTCCTGGTGTA--ATCAG-CCA-----T-----  
CCA----AAACAAAT-----CATTAAC-----GCACT-----TAGACAA--  
TCTAAGTGTGGATGGAC---TAATTGATATGCATCA-AGACTTAC-----  
-----TAGGTAT-----AAGTCTCTA---TTAG-CCAGTCAGTGATTTTTTTCATGA----  
CACTGGAGGGAGC-----AGGAGGTGAA--TGGC---T---TTGATATGGTGGTTCAATTTTCAGGGAAT-  
AGTTTATTGGCGCTATATTC--TAGCCATTGGAG--TTTTGTTGCCCATTCGTG-TGGGAATTC-----  
CTCCTTAATCAT-CCCCAGATAC--TCCTCC-----TTAGATGTTGCA-----GTGTTGATGATATTTCTCC--  
--ATCGTTCAT---CAGT---TTTT---GTGGGGGAGACCTTG---TGTTTT---CTGAAT-----  
-----TCTCCCT--T---GGTGATGACGTT-----TTCCG-----  
-----T-----CCTT--  
AGATATGTAATCAAGG-AC TTG--TTCAGAGTTTTTTAGCTGGTTGGATAT-----TAGGGTGAT-----  
---T-----TCCTTC-----AA-----  
AATCAAAAAAAGAAGGGTCACGTATGTTAGATCTTTTTGTCAAGTTGTAACAGGCAGTGAAGATGTGCGGGTA-----  
-----AGAGCTCAGTAGCAATAGCGATGAAAAA---A-----ATAGCAAAACGTGAG--  
-----AGTTTATCCCAGAGAAAGTCTCTGAGACCTTCTGCAGAAGAGCTGCA---  
GTGGGGATATGTAAGGAAAACAT-----ATTTTGTTTGAAGTCTGAA-----  
-----T---GAAGG-GGAT-  
-----TTCTTCGAGGGTGAAGGCA-----TGTTATGG---CTC-----A-TA-----  
-----CAGTG-----TTT-----CAC-----  
-----AAACTCTAT--GCT-----  
-----TAAC--CAG---TGAGTGA-GC-----CAGTG-----  
AGTTATATAAA-----TAACGTTTTGC-----TTT-----  
-----CCAATAAAAAACGACACC-----TG-----  
-----  
TGAGACAGGCACACGTGAAAGCACTCACTGAA-AT-----TTAATATT  
>CSMV\_M20021  
-ACC-----GCCCCCGGCCCAT-GCGAGGGCCC-ATGCTCAACGGGTCCC-----  
-----G-----AGCGGCTTTG-----  
-----GCTTTCACATGGGCTTGTCCC-----  
-----CCGCGATGCGATCTG-----C--TCTGCCA---TGCTTTGG--  
-CG-----GCTTTA-----TAAAGCCGT-TCTCAGAC---CTTTGTTTTTC-----  
-----CAATGCAGTACCAGGGGTACGAGCAGCTCA---GTAGATCTGGATCCGTGGAGC--  
---AACCCAGCCCCGGTGC-----TAGCTTTGCTTT-----CCCGGTG-----  
-----AAGGTGACAGCC-----CTCGTCTGTTTTCGCAGCG--  
ATTGTTGGAGCCTGTATTCTTGTA-----TTCTTGTACAAGACGTGCATTGCGGACTGC-----ATAA-  
CGCAGTACCGG-----CTTACGGACTACGGCTGT--CACACTTCGGCTGGG-----TTCGG--  
----AGGTGCGTT-----A---CC---CGTGACCTCTGC-----  
GCAAGCTAGTGCTGGT-----ACCAGCACCCC---TGTGTGTGTTCCCTGT-GCTCCTCAGGTACAGGCGTCCG-----  
-----TGGATC--TAC---CC---TCCGTAAGTAGGGTGTGATGAGTCTGCCAGC--TCAT-----  
-----GGAAGAG-----  
GAAGAGGCCCTC-----TTCTTCTCC--GCTC-----  
-----AGGCGTCTAAGA-----AGCGCCG-----CGTGTACAGG-----  
-----CCTGCTGTTTACGTTCTCTCG-CTCGGCGAGA-----ACCTCTG---CA---GGTGC-----  
-----AAGACTTTGTC---TGGGATACAGATGTGGCT-----TTCAAT-----AG-----  
-----GGGAGG-----AGGATGCTACC-----  
TCCTCACTAGCTATG-----CTCGAGGCTCTGCCGAGAAT-----CAGCGGAAGAC-----  
-----CGCTGAGACCA-----TCACGTACAA-----

-----GGTGGCAGTTAACCTG---GGGTGTGCT-----ATCTCCGGGACGATGCAGCAATATTGC-----  
--AT---CAGCTCCCACCGGTCTGCTGGATTGTA-----TACGAC-----  
-----GCGGCCCCACTGGCTCTGCTG---TTA---CCCCGAAGGACATCTTC-----  
G-----  
GGTACCCGGAAGGATTAGTTA-----ACTGGCC-----TACTACTTGGGAAG-----GTGGCCAGAG--  
-C-GGTGTCCCACCGCTTCATA-----GTGAAGCGCCGATGGG-----  
----TCTTCACCATGGAGTCCA--ACGGC-----TCGCGCTTCGACCGTGA--  
-----CTACACCA-----  
-----  
---ACCTCCCGGCTGCTATACCG-----CAGTCCCTTCCCCTTCTGAACAAGTTTCG-----  
-----CGAAGCAGTTGGGCGTGC-----  
-----GGACCGAGTGGAAGAACGC--T-----GAAGGCGGAGACTTCGGCGACATAAAG-----  
-----  
-----AGCGGAGCT-CTTTAC-----CT--AGTCATG-----GCTC-----  
---CGGCTAACGGA-----GC-----  
TGTCTT-----T-GTAGCC-----GCGGCAATGTC-----CGCGTG-TATTTT-----  
-----AAGTCTGTTG-----GGAA-----  
-----TCAGTGATTCCC---CAGAC-----  
TTC-----ATTTTCAAT-----AAAC-----  
---TG-----TGAGAGTTTGCTTGCCAAACAACATA---ATTTTCATTCATAACGA--T--GGCGCAGTATG-----  
CGCAAT-----ACATTTAAAAGAAGGGCGGACAGGA-----  
CAAAGGCGGGCGGCTAAGGGAAGCC-----G-----CAAGGGGC-----  
AACACC-----  
-----  
ACAT----CCCAAGAATGAGTTTTGGAAT-ATGC-----  
-----AGCCG-----CTGG-----  
CTTCACGCTAT-----TCCGA-----AGGAATGAAGGTTTCCCCTG--G-G-----  
-----AGAAGGT-----GATACACCA-CG-----  
-----  
-----GCG---TTGCCGTGAA-----  
-----  
-----AC---  
CAGTCGACCTGTTGGGTCGACA-TCGACTGCAGCCAGTCTTC-----  
---AT-----CCTCGTTTACGAGGATAATACATGGAATCCCCTTGGGG---  
ATTCTTTTCTTCTTCCCCTACTTGGGGTTTACCCTCAGGTCATACTGGCTG--CCGACGAGTCCCTT-----C--  
CAACAAGGGACGAACTTGAACG---GG---ATGTCATCAATGATGTTGAACTGGGCCTGGCAGTTCATTCCTCTA--  
-GGAAGTTCAC---TGAGTGCTGCCAGTAGTGAT--GAGTTCCAAG-----  
ACTTCTGGCCCAAGAAGTCTTTCCAGTTCTTGTGGCCACAGATGTA-CAGGCTTCGTCTCCGG--  
ACTCCAGGGCTCCA-----GACCTGGTTAG--GTCAG-ACA-----T-----  
CCA----TTGGAGGT-----CAATACGT----GCTTG-----  
TTCCTCCGAAATACCTGCATGCAGAC-----TGAGGGCTTGA-GGACTTAC-----  
-----  
-----AGTATAC-----AGCTCCTGC----TGGAG--  
CCATTCTCCTATGACCGGATGG---TCG-----GACATGTCCCTTGACGC--GTATGGCGC-----  
GGAGTAGGTTTGGAGGGGTCAGGGAAC-AGGGCATTGCACTGTATTG--GAATTGCTGTAG--  
GCGTACCGCCATTCGAA-AGGGAAACT-----CTTTCGAACCAT-GCTCAGATAT--TCGTCC-----  
CTGGACGTGGCG-----TTTGCCATGATTTGTTTCA---TGGTCTTGT---CCC---  
TAGAGGCCGACTGGGTCGGACTCCTGTTGACCTTGG-----  
-----GTT-----TCAGGAATTT-----TCCAAATCCCAGCTACTCTCA-GGAT-----  
-----GTTT--CATACAGTATTTTCA-GTACT-----  
GGCTGGCTGCCTTGCAGCTTGATAT---TTGGATGAA-----A-----TTCATC-----  
-----CA-----GGTCAAAGTATTTTGGAGAGGTGGTTCTGAAATTTGCTTCGAGTTGGACGAAGGCATGTAAGTGGG-  
GCTCACCGTC-----AGCATGGAATTCCTGGAAATGTAATATA-----  
ATTACATTTCTTA-----TTTTTTAGACGGTCAGCAATTTTCTGACCAGCCTTTCGGGACTGATAGGACA---  
CCTGGGATAGGTGAGGAAGACAT-----GTTTAGTCTCAGGGAGAAGGCCT-----  
TCTCCCCAGGCGTCACTTGGCCCTCCGCGAGATGGCACTTGTACGGAAG-----  
TGCCACTTCCCTCCCCCTCGCTCTCACTGACAGGCAGGGACGACATAATAAAGACGACGTGGCTTG-----  
--ATGGACAGCCGTAGGATGTGTTCTGAGATG-----TG-GA-----  
CTC-----CGAGC-----AAAATATCTCTAAT-----  
-----ACC---AGTTGCCACCTG-----

CCGAGTG--CCCTCTT-----CG-----GCTTTTA-----TGGGCCATAACAGGC-----  
-----CGGCTCTTTGCAT-----GGGCG--  
-GGG-----  
-----GGGC---AA--  
CC-----ATAATATT  
>DCSMV\_JQ948091  
-ACC-----GCCCATCTTTAC-CCGAGGGGCCTACGCTCAGCAGGCCCC-----  
-----G-----AGG-----  
---CTTTGGCGCCCACTAGGGTTTGCGCC-----  
-----C---GCCTGACGTA---TTGAGGTTTGCCCGCCGGTT-  
TAATTTGAGTGCCG-----TCTTTA-----TAAGACGGGACCTC--GC-----  
CGCCCTTCTA-----TGGCGGAGTACCCTCAGT-----CAGCCTTTGTTGGAG--  
-----GTAGTGC-----GATTCCGCGTCAAGGCCCGGT-----C-----GATAGCTTTGCTTC-----  
GACGTTG-----AAGGTAAGTCT-----  
TTGGGGCTCTTTGCTACG--TTCATTGGGGCCGAGTCTGTCA-----  
TTTTTTGTACAGGACGTGTCTATCAGACTGC-----ATTA-CGCAGTACCGG-----CTTGGTTCCTGGAGCAGT--  
-ACCGTCAATTCGGGC-----TTTGG-----GGTAAC-C-----G-----GG--  
CGTTACCCAG--GTCGTACGTGGAGACCTAGAAAGAC-----A-AGT-----ATCTGTCC-----  
--CCGTTAGGGACTCTGGTGTGTTTTGCCTGT-----GGTTTCAGGAG-----  
CTGCTGCAGTTGGCGGAGGCTGAGTC--GTCATGCCTGC-TTCGT-----  
CGAAGAG-----GAAGCGTGGGAG-----  
----CAGTTCTGCT---GGGA-----AGCGGCGTAAGA-----  
AGCCCGG-----GTACACGAAG-----TGGACTGGTTCCCGTTCAGCGCTAGCCAG-  
GA-----TGCCTG--CA---GGTGC-----AGACCTTCCAA-----  
TATGCTGAGGATCAGGCA-----TTTAAT-----GC-----AGGAGG--  
-----ACGTGCGTGT-----TGCTCACGGCATTTA-----  
CCCGCGTTCTGCAGAGAAC-----CAGCGGAAGTC-----  
CCAGGAGACCA-----TTACGTACAA-----  
GGTTAGTGTAGCCTT---GGCGTTTCG-----GCATCTTCTACTGTACAGAAGTACTGC-----GT---  
GAAGAGCCAGCCGATATGCTGGCTCGTG-----TACGAT-----  
----AAGACGCCTACTGGGATTGCTGACCTTG---TCCCCTCGGACATTTTC-----G-----  
-----ATGTGCCGAGTGGATTGACCA---  
---ATTGGCC-----TTCTACCTGGAAG-----GTCAAGCGAG---A-AGTCTCGCACCGCTTTGTG--  
-----GTGAAACGGCGCTGGC-----CGTTTACGTTGAGTTGCA--  
ACGGG-----AGTACCTTACGGCGGA-----  
-----TTACACGA-----  
-----AGCTGCCGGTGCCCAATACA-  
-----GACAACCTGGTGTCCGTGAACCGGTTTCG-----  
-----CCAAGGGATTAGGAGTGC-----  
GGACCGAGTGGAAGGATACGGT-----GTCTGCGGAGGCCTC--CGACATTAAG-----  
-----GGTGGAGCC-CTTTAC-----AT---AGTTCTT-----GCCC-----  
CGGCTAACGGG-----GCGGGGTAATT-----AAGGTG-TACTTT-----GT-----TGTTTT-  
-----C-ACCGCCC-----GCAA-----  
-----AAGTCTGTGG---GCAA-----AG-----CCC-----  
-----AGTGT-AAT-----GAGCCCCTTG-----  
---GGCGAGTATT-----AATAAACTCCA-GTTTTATT-ATTGCAC--T--TGTGCA--GT-----GGCGGT--  
-----ACGACACAGAAAATACAACATTAAC-----  
CTAAATTGGCGGCCAGATCGAAGGC-----GGCTAAGGGTTAGGACTCGAAA-----  
AAAA-----A-----  
-----  
AAACAC----ACCCAATCATATTAATGAAA-ATGCGCGGCGC-----  
GTGCC-----GACGGAGGAG-----TCAC-----  
GCTGTAGCTGCGCCAAGGCTTTTGA-----AGAAAGTCTCTCCTT--G-G-----  
-----TACATGT-----AATGTACCT-CG-----  
-----CAG---TTAGCGTTAA-----  
-----AC---

CAGTCAGCCTGACCAGGCTGCA-TTTGTTGGAGCCAGTCTTC-----  
-----GT-----CCTCGTTGGCGAGGATTATGCATGGGACTCCGTTGGAG---  
AGCAGCCGTTTTTTGCCGTACTTTGGATTGACGGTGATGTCCCTCTGTGCT--CCGACCAACCCCTT-----C--  
CAACAAGGGACGAATTTGAAGG---GG---ATGTCATCAATTACATTTGATTCAGCGTCGGGAATGATGT---TGA--  
-GGAAGTCGAC---GCTGTGTTGCCAGTAGTTAT---GCTTGCCCAG-----  
ACTTCTGGCCAGGTGGTCTTTCCGGTACTAGTTGGTCCGCAGATGTA-GAGGGATTTTCTTTCGT--  
TCAGCAGGGTTTTCT-----GCCCTGCTGGT--GTCAT-GCA-----T-----  
CCA---TTGGAGGT-----CAGCTCTA---GCTTG-----  
TTCCTCCGAAAGACCGGAGTGAATGC-----TGTAAGCATAG-GGACTTAC-----  
-----AGTGTAC-----AGTTCTGCT---CGGAG-  
CCATGCTCCGAGCACTGGATGT---TCTTCTTGGCTTGGCATGT-----T--GAATGGGCT-----  
GACGTAGGGCGGAGGAGTAGAGGGGAAC-AGCCGTTCCGGCTGAGTATTC--AAAGTTTTGCAA--  
CCTTGTTGCCAGTCGAA-TGGGAAGGT-----CTTCTTACCAT-TGAGAGATAC--TCCTCC-----  
TTGCTCTTGGAG-----CTTCTGATGATATCCGCCA-----TTTTGGCGT-----  
CCTTTGTTGTTGACGCGTCGATCT-----TGCGTTTGGC-----  
-----GAC--GTCGCTCTCCGTGTACGC-----CCCCTCTCGGCGTACGATACC-  
GGAG-----ATTT--CTTGCAGTATGCAAGG-  
ACTTT--GTGGGGCATCCTTGCCTTTTGTACGT-----TGGGATGGT-----A-----  
TTCTTC-----GA-----  
GGTCAAGAAGCGTGCACGCGTAGTGCGTACGTGTTTCTTGCATTGCACGAAGCAATGCAGGTGGA-AGGTGCCGTC---  
-----TTGGTGTAGTTCTCTTGGCCACGTATACATACGT--A-----GGTCAAACCTTGCGA---  
-----AGTTTGTGCGTGATGTACGCAACGCTTCTGTGGATCAAGCAAGCA---  
CTTGCTGTATGTTAGGAAGATGT-----TCTTGGCCCTCACCTCGAAG--CT-----  
TGCTTCCGCGAGCGCCCGGAGCGCGTTCCGCC-----AGTCGGCAGTT--TGCCGAGTTTGCCGACT-  
CTGTGTCACTGACAGGAGGCCATCTCGTCAGAAGCTAACGTGGATAG-----  
CTTCTTAGCCCTTGGATCAGCTTTGAGATC-----CGAGG-----TTT--  
-----TGA-----GAAACTCTCT-TCCT-----  
-----AGA---CCTCGCCAGTTG-----  
CCGAGTTGCCCGCTCCTTGACGGC-----CTTTAAA-----TAGGCCGAGCGGGG-----A-----  
-----TTGCTTT--GTT-----ACTTT--  
-GGGCCCTAGGTA---GATGGGC---GA-GC-  
-----ATAATATT  
>DDSMV\_HM122238  
-ACC-----G-----CCCCGGCCCATGGCGAGGGCCCTACGCTCAGCAGGGCCC-----  
-----G-----  
AGCGGCTTTACCTGCTTTGGTGTCTTTAACTTGGATTT-----TCGCAGTGCATCTG-----  
CCATCTGACC---GGTTTTGT---C-----TTTTA-----AAAGACCGC-TCCC--  
CC-----CCTTTGTTTC-----GAATGGCGACTCCGACATTTGA-  
TAGTGCATATTTTAGATCTGGATCTGTGGTTC-----AAAACCAAGACGGGAC-----  
AAGCTTTGCTTT-----CCCGGTG-----AAGGTGACTGCC-----  
-----CTTGTCTGCATTTCTTCA--ATTGTAGCGCCGCAATACTTGTA-----  
TTTTTATACAAGACCTGTTTACAAGACTGC-----ATAA-CGCAGTGGAGG-----CTTACGACATACGGCAGT--  
-CACTTTTTCATCTGGT-----TTTGG-----AGGTACTCA-----T---TT---  
GGTGACCTCAG-----GCCAGCC--TGAGAGT-----  
AACCATACTCCCATTGTGAGTTTACCTGATAGATCTGCAGTTTTCAGTGCCCC-----  
TGTTTCGTTAC---CTGTTGGTTTGCAAACA-----TCATGAGCCCTGCAGGC--TCAT-----  
-----ATAAGAG-----GAAGCGCTCCGC-----  
-----CGCTTCGTCT--TCAG-----CGACGCCAAAAC--  
-----GCCGTCG-----CGTCTATAAA-----  
CAAGCAGTGAGTCCTCTCT-CAAGGAGAGA-----ACCACTG---CA---GGTGC-----  
-AAGATTTTACC-----TGGGAGCAAGATTCGGCG-----TTCAAT-----GC-----  
-----AGGTGG-----CTCCGCCTACC-----TGCTTACAAGTTATG-----  
-----CCGCGGTTTTCAGCTGAGAAT-----CAGCGCAAGAC-----  
-----CGCGGAGACGA-----TCACCTACAA-----  
GGTGGCTATCAACCTT---GGTGTGCT-----ATTAGTGGCACTATGCAACAATACTGT-----GT---  
GTCGAGCCGGCCAGTGTGCTGGCTCGTT-----TACGAT-----  
----GCGGCACCGTCCGGCACGGCTG---TGA---CGGCTCAAGAAATTTTC-----G-----

-----GATTCCCTGATGGTTTGAAGA---  
---ACTGGCC-----AACAACTTGAAA-----GTGGCCAGAT---C---GGTGTCCCACCGATTTCATA---  
-----GTGAAACGTCGGTGGG-----TGTTTACACTGGAGTCCA---  
ACGGC-----TCCAATTTTGCTACGGG-----  
-----GTACTCTA-----  
-----GTAACCCGTGTGCCATACCG---  
-----CAATCCCTGCCGGTCTGAACAAGTTTCG-----  
-----CAAAGCAACTTGGCGTGC-----  
GGACGGAGTGGAAGAACAC---C-----GCAGGGGAGACTTCGGCGACATTAAG-----  
-----AGCGGCGCT-CTTTAC-----TT---AGTGTTG-----GCTC-----  
CGGCTAACGGA-----T---GTT-----AACTTT---  
-----T-GTAGCAC-----GCGGAAATATC-----CGCATG-TATTT-----  
-----AAATCCGTCG-----GTAA-----  
-----TCAGTGATTACCGTTCATGG-----TTT-----  
-----ATGAATAAT-----AAACACAGTT-----  
----TGATGACAAGCTTGGCAAATTA-----TTATTAATA---T---GAGGCATTATG-----CCGATT---  
-----ACA-----ACATGG-----  
TTTTGTGTGTGCGGGAGGGGAACCC-----G-----GACCACGCACCC-----  
AAAACACTTAAATA-----  
-----  
AAACAC-----ACCCAACATTACATTATTAAT-ATGC-----  
-----CGCC-----TAGC-----  
GGAGAAGCTATGCTTCGACGTCCGA-----CGAAGGAGGAATGAAAGACTCTCCTG---C-T-----  
-----TGAAGAT-----AGTAGACCA-CA-----  
-----CAG---TTGCCGTGAA-----  
-----  
-----AC---  
CAGTCGGCTTGTGAGGCGACA-TGGTTTGTAGCCAGTCTTC-----  
----AT-----CCTCGTTCGCGAGGATTATTGAAGGTATCCCATTCCGGG---  
ATAGTCTTCTTTTACCGTATTTTGGATTTACGGTTATGTCGAACTGGCTA---CCAACCAACCCCTT-----C---  
CAACAAGGAACGAACTTGAACG---GA---ATGTCATCTATGACATTATAGATGGCATTTTTATTCCACTCTGTGA---  
-GGAAATCTAC---AGAGTGTGTCAGTAGTGGT---GAGTTCCAAG-----  
ACTTCTGGCCCAAGAAGTCTTTCCAGTTCTTGTGGTCCACAGATATA-TAAGGATCGTCTTCGA--  
TGATGCGGACCTCG-----TTCCTGGTTAC---ATCAG-ACA-----T-----  
CCA---TTGGAGGT-----CAAGCTTT---GCTTG-----  
TTCCTCCGATACTAATGCATGAACAC-----TGTAAGCAGAG-ACACTTAC-----  
-----  
-----AGTGAAG-----AACTCGGTA---TCGAG-  
CCTCTCCAATGACCGGATGG---TCA-----GACATGTCGTTGGAGAC---GAAGTGTG---  
CTGGTATTGTATCGGAGCTTCGGGGAAG-AGCGCTTTGGCGCTGTATTC---AACTGTTGGAG--  
ACGGATTGCCAGTCAA-CGGAAATGC-----TTTCCGTATCAT-GGACAAATAT--TCGTCC-----  
CTGCTTGTGGCG-----TTAGCCATGATTTGTTTCA-----TTTTTTTGT-----  
CACGGGTAAAGGAAGCTAGCTTCTTTTCTCGATGCCTTGG-----  
-----GCT-----TTACGAAGAC-----CCCGTCTTCGTAGAAATCTGCC-  
GGAT-----TTTT---CTGACAGTATTCCAGA-  
GTTTT---CTCTGGATTTCTTGCCGCTGAATGT---TAGGATGGA-----A-----  
TTCAAA-----GA-----  
AATCAAAGTATTTGGCGGATGTGGTTTCGGAAAACCTTGTCAAATTGAAGGAACGCATGTAAATGCG-GTTCCCCATC---  
-----TTGATGTAGCTCTTGAGCGATATACATATACTG---T-----  
ATATTATACCGCTTACAAAGTTTTTTGAGA-----AACGA-----ACCAGCATCCTTTGGAGGGATTGGGCA---  
CCTTGGGTATGTCAGGAAGACAT-----GTTGAGAGCGGACGTTGAAG---CT-----  
TAGCGGCAGACTTGCCGCACTCTCCGAACCTGGATACTCGC-CATAAG-----  
AGCGAGGATCGAACATGACTGAGTCACTGACAAGCTGGGACGACATAATAAAAGAGGACGTGGCTGA-----  
--ATGGAGAGCCGTAGGATCGTCTTTGAGATC-----CG-AT-----  
TTG-----TGAGT-----GAAACTCTCT-TCCT-----  
-----ACC---AGTTTCCA-ATG-----  
CCGAGTG---CCAACCT-----AC-----TCTTTTA-----TAGGCC-----GC-----  
-----CGCCGC---GACAT-----GGGCC---

-GAG-----  
-----GGGC--  
AAACCA-----ATAATATT  
>DfasMV\_JX458740  
-ACC-----TGCTTGCCCC-----  
-----A-----C--  
CCGTTCCCAGAGTGAGACGTGTGCGCTCTACGTCGAACGAG-----GGGAGATGAC-----  
-TGA-----AAGGAAAACCACTATATAAAGCAG--  
TTGCTTGGCACGT-----A-----AGAA-----  
AAGGATGAGATAAGAGGC-----TAG-----AGCCGGTTCATGTCA-----TAT-----CAGCCG--  
CCATACG-----GG-----GACACCTC-----TTTTGAAGGTGGTG---  
AGTCAGGAGTGAAAGCAAATCCCCTCGGAATCGGAAACGATTC-----CGCTT-----  
-----GGAGGACGCTCGCT-----CTTGCTTTCACGGTGACA--  
GCCGTGACCCTAGGTTTGCTGTTC-----GGAGCTTGGAAGCTCTGTGTGAAAGACTGT-----  
CTTCTCACGCTTCGTG-----CTAAGAGAAGCAGGACGA-----CGACCGAGCTG-GGA-----  
TTTGG-----AAATACGCC-----TCAACGG-----  
-----CCG-----GGGGTTAA-----  
-----CCAGGTCGCTCCTGTGATT-----GCGTAAGA-----  
TGAAGAGGCCAAGTGAGG-----GAAGATAC-----AAGG-----  
GGAACGTCTATAAGCGTGTGAAGCCGGG-----AACTTCAGGCG--GTAA-----  
-----CACTCCGGAGG-----  
AAGTGTGGTAGCACGTCTGAAGAAGGTC-----CGGATGG-----  
-A-----GGCCTTCACCTTTG--CA-----GTTTA-----TTCAGTACACC-----  
TGGACTACCGGAGGTAGT-----CCAATTACAGTTGGTGC-----AGGAGG--  
-----TTATGTTGCAC-----TTCTAACGTCGTACC-----  
CGAGAGGGTCCGACGAGGAT-----AAGCGTCATAC-----  
TGGTGAGACGC-----TTACTTACAA-----  
GGTCGGGCTGGATCTTGTATTCAACTATAATTCGA--AGATGGCGACTGGAAGGATAGCC-----AG---  
AACACACTT--CTGTGTCTGGTTGGTG-----TATGAT-----  
----AGTCAGCCCAGCGGTACCCT--GCCGGCTGCGCATGGG--ATCTTT-----G-----  
-----ATCTCATTGACAGTTTCACTG--  
--ATTACCC-----AGCTACCTGGAAG-----ATTAACAGGG--A-CATGGGTCACCGCTTCGTG--  
-----ATTAAGAGGAGGTGG-----GTGAA--  
TTGGT-----  
-----TGGAA-----  
-----GCCGACGGCTCCATCTCTACCTCTAATTACTCCGGTGCACCCTCTGCT-----CCTGCCAA--  
-----GTCTTCCGTGGTCTTCA--ACAAGTTTCG-----  
-----TTAAGCGTCTTGCGGTGC-----  
GAACTGAGTGGAAGAACAC--T-----ACCACCTGGAGGTATAGGTGACGTGTCT-----  
-----AAGGGAGCA-CTCTAT-----AT---TGTTGTT-----GCT-----  
AGGCAGTTGT-----A-----TGATAT--  
-----A-GATGTTT-----GTGGAAGACTG-----AGGGTG-TATTTT-----  
-----AAGAGTGTG-----GTAA-----  
-----CCAGTAAGTATGTAATAA-----  
--GAGA-----ATAAATAAA-----TGA--ACG-----  
-----CAGTTCCTTTATTTA--TGATTGAG--T--AT-----  
-----A-----CAGACG-TCGAAGA-----CGTTACATT-----  
-----CAAATTT-----CAAACACTCAAA--  
CGCAGCCTCGGGCTAAAGACCGAGTC--TC-----  
-----  
AAGTGGCCCAAGACCAATGATAATCGAAAAACAAGATCTATAT-----  
----GAAAACCCGCC-----GTCT-----  
GTAAGACG--GCTATTCTTCAACGA-----AGTTGAAGAACTTCTCCCCTG--C-A-----  
-----TACATGT-----AATATATGACGA-----  
-----CG---TTGCTCTCGA-----  
-----  
-----AG---  
TACGTCTTCTGGCTAGAAGACA-TGCAGGTTAACCAGTCTTC-----

-----GT-----CTTCATTGACGAGGATGATACATGGTATGCCTCCTTTG---  
ATGCGTTTTCTTCTTCCCGTATTTGGGGTTAACGGTGAAGTCAGACTGGGAG--CCCGCAAGAGCCTT-----C--  
CAACATGGACAGAAGCTTGAAG----GA----ATGTCATCTATTACATTGTAGGTAGCGTTATCATTTATACA---CAC--  
-TGAAGTCAAT----ATTATTCTGCCAGTAATTGT--GGACGCCTAG-----  
ACTTCTTGCCAGGAAGTCTTTTCTGTCTTGTGGTCCGCATATGTA-GAGGGAAAGCCCCCTAGA---GGTGCGATT-  
-----AGGCTGAAGGAGGTGGATTGA---A-----G-----CCA-----  
GAGTAAGT-----CGGAGGTT-----GCGGA-----TGCGTGTGGATGGAG--  
-GAGACAGTAGGAGGCT-GGACTAAC-----  
-----  
-CTGGTAT-----AGGGTGTTA---TCCAC-CCAGTCTTGAATGTTTTTCATTA---CATATTAGGGATTTCAGT--  
AGGGAATGGG--C-----T---CTTGTACTCCGGTGTGACCTCCGGGAAG-AGCTTGGGAAGCCGAATATTC--  
AAATTGACTCAG--TTTAGTAGCCCATTCAAA-TGGGAAGGA-----TTTTCTGACCAT-TGAGAGATAA--  
GACTCT-----TTTGAGGTCGCG-----GTGGAGATGATTGAGCGCA----TGATGTTGT----  
TCCTGATGTTTTCTTCAAAACGGGAACCCAG--TTTCC-----G-----  
-----TCCCTTC--TTAGC-CGGCACGTATGT-----TCCAATGCAGAATTGGGTGATG-  
GGGT-----TCTT--GAGGATGTAGTCCCTA-  
ACGGA--TTTTGGTGATATGGCGCTCTGGATAT----TAGGATGATGAGCCCC-----  
-----GA-----  
TATCAAAAATACGAGGATTATTGGAGGAAAAGTCCGGCTAAGCTGGAGGAGACCATGGAGATGGT-ACTCACCATC---  
-----ACTATGAAGTTCCCTACTAAAAGGATATATTT--A-----GGTCATGGCTCTGC---  
-----ATCTTGCTCTGAATGATCTCTCCGGCATCCTTAGGATCGAGATCACA---  
CCTGGGATATGTTAAGAATATGT-----TTTGAGCTCTAATTCTGAA-----  
-----G-----TGG-  
GAGGGACCTGACTGAGCAGAT-GAAGAAGACATGA-----AGTACTTAGTCGTGGGAGCGCTCG-----AGCT--  
-----GAGTG-----TTT-----TACTCCTTACTA-----  
-----CATATGCTTG--CC-----  
-----TTGCCCTGG--CGGGTGAG-----ATGGG--  
---C-----CTTAAA-----T-----  
-----AGGCTG-----TATTTGG-----  
TG-----  
GGCTTTTTTTCGGTCCGGC-GCTCGGAAC-----GGGTGAGGCAAGC--AGCAATAATGTT  
>DoYMV\_AM157413  
-ACC-----GGATGGCCGC-----  
-----CC-----  
-----GCCCGCCACGTGTCTCAATCCTGA---CGCTCCGTGGAGTCT-----  
-----TATTTAG-----CGCA-CCCGGATTTCAAATTTCA--  
-----CTATA-----AAACTTGGTCGACAAGTT----  
TTACACATCTATCTAAATGTGGGACCCATTGGTCAATGATTTTCTGAC-----  
ACACTGCATGGATTGCGGTGTATG---TTAGCTGTGAAATT-----TGTCAG-----  
GAATTATTGGAGACCTATCCGCG-----TGACTCGAATGGACG-----  
CATCCTATTGGAGGAGCTAATT-----TCGGTGTTCGTTGTAAGCGTT-----  
ATGCCAAAGCGCAG---T-----TTCGATATG-----GCGTTTTCTACTCCAA---  
---GACCCAG-----TGTA---CGTCGAAGGCTCAAC-----TTCGA-----  
CAACCCATC-----TGCAACA---CCGATGTCAGTT-----  
-----  
CGTC---GAACTCCGAGCACCAGTCGTCTAGACAATGGACCAATCGCCCCAT-GAATCGCAAACCGCG-----  
-----TCT-----ATATCGTATGTATCG-----  
-----CTCACGCGATGTACCAT-----ATGGGTGCGAGG--  
-----GACCATG-----TA-----  
AAGTTCAATCATTTGAACAACGGCATG-----ATATCAGTCATACTGGTA-A---GGT-C-----  
-ATGTGTGTTTC---CGATGTCACTAGAGGAAAC---AACCTTACTCATCGTGT-----  
-----TGGTAA-----ACGATTT-----TGT--GTTAAATCTG---  
-----TTTACATTATTGGCAAAATT-----TGGATGGACGA-----  
-----AAACATCAAGA-----CAAAAAACCA-----  
TACAAACACAGTCAT-----GTTTTGGCTAGTTCGTGATCGACGTCCTTTT-----  
-GGAACG---CCTATGGATT-----  
-----TGGGTCAAGTGTTT-----AACATGTAT-----G-----  
-----ATA-----  
ATGAACC-----CTCGACCGCCACT-----ATCAAAAACG---A-CCTACGTGATCGTTACCAA-----  
-----GTCTTACGTA---AG-----TTTCAT-----



TCAACTG-----TTACCGGAGGTCAATA-----  
-----TGCCTCGAGGG-----  
-----AGCAAATGTCATCAAGAGATTTT-----  
-----GGCGT-----GTCACAATT-----  
ATGTGGTCCATAACCACCA--A-----GAAGCTGCTAAGTATGAGAATCATACT-----  
-----GAAAACGCATTATTAT-----TGTATAT-----GGCATGTACTCA-----  
TGCCTCAAATCC-----AGT-----  
GTATG--CA-ACATTA-----AAGATC-----AGNATC-TACTTCTATG-----  
-----ATTCGATC-----TCAA-----A-----  
-----TTAATAAAATCTCTGTTTTA--TT-----  
AATATAA-----CTTATA-----TTGCACA-----  
TTATATTCGAAGTCGACTGCTTCTACTCTTTGAAATACATCG-----TAC-----  
AACACATATTCGCAACCGCGTAATACATTGTCATCGAAATAATTCCCT-----  
AAATTATTTAAAAATCTAAAAAGG-----AAGTTCCTGAATACATTCAAGATCCGC-----  
CCAGATTGCGGAGTC-----AA-----TCGATGGTAA--ACTACTAAGTCCAAGAA-----  
-----TGCCCTTGT-----GTATCCCCAACGCTTTCTTCAA-----  
-----CCCCTGGTTGAACATTATGCGGATCTTGGT-----  
TCTGTGTTGGTTCGGATC---GAACAGGAACCCCTCGTGATGCTCCAGGATTTTGAAAGACAGGGGAT-----  
TCTTTAGCTCCCAGATAAA-----CACGC-----CACTCTGTAGTTGAGCTGCAGTGA-----  
-----TGGA--TTCCCCTG--TGCGTGAATCCG--TCATTCCGGCAG--TTGATAT-----  
-----TTAGGTAATACGAACAGCCA-----  
-----CAG--GTCAGATCGA-----  
-----  
TTCGCTTACGCCGAATCGTTTTG-----  
CGCTTCTTCGCTGTCGATGCTGTGCCTTGATGC-----TCGGTAGAGA-----  
ACAATGGCTGTTGAGGGTGACGAAGACCGCATTCCTGTAAAGCCACTCCTTCAATGATTGCTTTT-----  
GTTCCCTCGTCAAGGAACCTTTTATA--GGACGAACGTGGTCTGGATTGCAAAGGAAGATGGTGGGAATCCCACCTTTA--  
-ATCTGAGTGGGCTTACCGTATTTGATATTGCTTTGCCAGTCCATCTGGGCC--CCCATGAACTCTTT-----A--  
AAAT--G-----  
CTTTAAATAATGCGGATCAACGTCATCAATGACGTTATAACCAAGCATCGTTGGAAAAGATCTTTGGACTAAGATCCAG--  
--ATGTCCACACATGTAATTAT--GGGCCCCTAA-----  
TGATCGGGCCACAATGTCTTCCCCTGTTCTTGTGCTCCTTCAACAAC-TATGCTCATCGGTCTTCT-----  
-----  
CGGC-----C-----  
-----GCGCAGCG--GGTTCGCTCCTCCACGACGGATC-----  
-----  
AACA-----ACGTTACTT---TCTG-CCCAGTCTGTATAACAGACGGCACTTGACTAAAGTCG--G-----  
TTGGCTT--GTAACACGA---CGTGTAACCTGTAATAGGAGGAGCGAAG-ATGCGTTCAAGGTTAGATCT--  
CAGATTGTGGTA--CTGGAACACATAATTGTG-TGGAAGTAA-----TTCTTTAATAAT-GTTCATAGCA--  
CCTTGA-----ACCGTA-----CCGGAATTCAA-----CGCCGATGCTACA-GCAT----  
CGTCAGCTGTC-----TGCCGACCTCCTCTA-----  
-----GCAGGTC--GTCCGTCGATCTGAAATG-----TTCCCCAG--TCGACGTAGTCA-  
CCGT-----CCTT--GGTGATGTAGGATTTG-  
ACATCAGATGAGCT---CTTTGCTCCCTGGACAT-----TTCCATGGAA-----AA--  
TCTGTGTGCTATGAGGATGGGTAA-----  
GGTCGAAATGTCTGGCATTTCGGAACCTGGGCCTTACCCTTGAACCTGGACGAGGGCATGGAGATGCA-TAGTCCCATC---  
-----TTGATGTGCTTCTTGTGCGACTCTGATGAACAA--T-----TTATCCGACGGACAC---  
-----TCGATGCGACAGAGCTGTTTCGAGAGCTTGTCTTTTCGACAACGAACA---  
TTTGGGGTAGGTCAGAAATATAT-----TTCTGGCAGAAATGCGGAA-----  
-----  
GCCTGGAGTTCTCATCTTTTAAATGAGAGAAGGTGCCACG-----TCATCG-----  
-----GTGTATCGGT-----  
-----GTCGCTTCAAAGTTC-----  
-----CCAGAA-----TTGGTGTCAT-----  
-----TGGTGTCG-----ATATATA-----GGGGTCTCTAAT-----  
-----AAGGGGTA-----CGGCCATCCGCAA-----  
-----

TAATATT

>DSV\_M23022

-----  
-ACA-----GCCC--CACCCCT-GCGAG--CCCT-----TTAGG--G-----  
CGA-----G-----CGATTT-----  
-----GATTTAAAGTAAGGAGGGGAAA-----  
-----CA--AAGTGCCCC-----GACAGAATAAAAAGCCCGCACCCAGCG--  
--G-----CTATAA-----ATCAG--CTCAGCTATT-----GCGATCCTTA--  
CATGGAGTGGTA-----CCAGAGTG-----ACACT-----GGCAATCAAAA-----  
GCCTC-----AAAGTCCCACGCAAGCTCCGT-----CTT-----TGCCGTGGAGT-----CGTCTCG--  
-----GTGAGATAGCTATA-----TTGACACTATTAGCAGTG--CTTTG--  
-----CATTTAC-----CTGCTTACATTTGGGTGCTGAGAGATCTT-----  
ATCTTTGTTGTAAGAT-----CTAACCGAGGACGCGTAG--CGGAGGAGCTT-GAA-----  
TTTGG-----TCCCGCCGA-----GACAAGG--AGCGCTTTGGCACA AAA-----GC-  
GCGGTGGTACCTAGATCT-----GAAGTTGTCCC-----GTCACAAGGAG-----  
-----CGGACC-----CTCCCGCTACTGA--AAGCCATCTG--CCATGTCTTC-ATCGAT-----  
-----GAAGAG-----GAAGA-----  
--G-----G--ACCGATGAGGGGA-----  
GCGGCTCCCGTC-----GCTTCAC-----TAAGAAGAA-----  
ATCCGCCGCGAAGG-----GGCGGACTAGCTCGTCAA--GAGCTATTCGT--CCCGCCCTC--CA--AATTC--  
-----AAAGTTTTGTG-----TCTGCAGGTGCAGCCACA-----ATTGCTGTTCCC--AC-----  
-----TGGCGG-----AGTATGTCATC-----  
TACTGAGCTCCTACA-----GCCGAGGCTCCGGCGAAGGA-----GACCGGCACAC-----  
-----CAACGAGACTG-----TCACGTACAA-----  
-----AGCCGCATTCGACTAC--CACTTCAGT--GCTAACGCTGGACCCTGCGCATACTCC-----  
--AG--TATTGGAGTAGGTGTCTTGTGGTTGGT-----TATGAC-----  
-----GCACAACCCAGTGGTCAGGT--ACCAG--CGGTAACGACATATTT-----  
C-----  
CGCATGATACAACCCTACAGT-----CCTTTCC-----ATACACCTGGAAG-----GTGGGAAGGG--  
-A-AGTGTGTACCCGTTTCGT-----GTGAAACGCCGGTGGT-----  
---GTTTTACAATGGAGACCA--ACGGG-----CGCATCGGTAGTGACAA-----  
-----ACCTCCAAGCAA-----  
-----  
--CGCAGTCTGGCCTCCGTGCAA-----GCGGAGTATTTACTTCC--ACAAGTTCG-----  
-----CGACAGGACTCGGCGTCA-----  
-----AGACCGAGTGAAGAATAC--A-----ACGGATGGTGGCGTAGGCAGCATCAAG-----  
-----  
-----AAGGGTGCC-CTGTAC-----TT--TGTAATA-----GCCC-----  
--CTGGCTCGGGC-----AT-----  
AGATTT-----T-ACACTGT-----TCGGTACCTGC-----CGTATG-TACTTT-----  
-----AAGAGTGTGG-----GCAA-----  
-----CCAGTAAGGTTGT-----CC-----  
AGA-----A-TGAATA-----  
AAACTAGTTT-----TTATTAT-----TGATTGCGAAGCA-----ATTGCAT--TACAAAGAC--  
GCCGTCAA-GCGGCA-----ACT--AAAACA-----CACATG-----  
-----ACCCCGCGC-CGGGCTTAAGACCGGCTCGCTGGGTACCCTGCGAT-----  
ACATAAAATTA AAA-----  
-----  
AAAAAC-----ACAGATCTGAAT-TACGCCGGCGC-----  
GTCGTCGAGCGAAGCGAGTGA-----CGCT-----  
GTAGCTGGCCCTTCTGCGTAGCTGA-----AGAACC'TTCCCCTT--C-A-----  
-----GTCATTT-----TGTAATGA-CG-----  
-----  
-----GTA--TTGGCTTCGA-----  
-----  
-----AG-----  
TACGACAGCTGCGCTGGAGTCA-TGTCTTTCATCCAATCTTC-----  
-----AT-----  
CCGGATTGGTGAGGATTATTGATGGTATGGATTTAGAAGCAACACGCTTCTTTTACCATACTTAGGGTTGACGACGTAT  
TCTTTCTGACAA--CCAATCAACTGTTT-----C--CAACAAGGACAGAAC'TTGAATG---GT-----

ATGTCATCAATGACATTGAAGTGGGCTTCCCTCGTCATAAG---AAG---CCCAGTCTAC-----  
ATTATTTTTGCCAGTAATTAT---GTCTACCTAG-----  
GCCTCTGGCCCAAGTAGACTTTCCAGTTCTTGTGGACCGAGGATGTA-GAGGCTGCGTTTTCTG--ACCCCATCC---  
GT-----GACCTAGTGTA--ATCAG-ACA-----T-----CCA-----  
TTGTAAGT-----CAGAGATA-----GCTTC-----CTCGCGGGTATAACAGGTAGGGTTCA--  
ACAAGCAATAAGCTTCA-GCACTGAC-----  
-----  
-CTGAAAG-----AGGTCATTC---TGAAG-CCAATCTGTGATGGTCTCTTGG---CACAAGAGGTCAGGCTCAG--  
-ACGGAGG--ATGAGGATT---GATGAATGGTGCAGCCTCAACTGGGAAC-AATCTATCAGCTGAGTACTC--  
GAAGTACGACAG--CTTTGTAGCCCAGTCATA-AGGCAGAGC-----CTTCTGCACCAT-GGAGAGGTAC--  
TCTTCC-----TTTGATGTAGCA-----TGATCAATGATGTCACGCA----TGACATCGT----  
CCTTATTGTGTTTCTTCTCGGAAGATGAACTCTC-----CCCAAGAAATGGTGATT-----  
-----TTC--TTGG-----GACAAAAGT-----ACCTCTCTCAAATTTCTCCACT-  
GGGT-----TTTT--CAGTATGTATGTCCTG-  
ACCTT--GTTGACGCTCTTTCGACTCTGAATAT-----TTGGGTGGA-----A-----  
CTCAAG-----AA-----  
TGTCAAAGAACCTCTGGTTCGTGGTGTTTACCTGCTTCTCAGTTTGAACCAGTGCATGACTATGCA-ATGATCCATC---  
-----TGCATGATGCTCGGATGCAACAAGGATGTAAAT--G-----GGATCCAAGACTTA---  
-----AGGAGATCCCAGAGATGATCAGCTATGAGCTGAGGAGAGTGATCGCA---  
CTTGGAATAGGTCAGGAATGTGT-----TAGCATTCCTGTGCCTGAA-----  
-----TGAACGGTTTG-----  
--CAGCCATTGGAT-----GAAGAAGG-----AACGGCTAAGGGAGGCAC---GGCAGATT-----  
-----TGGGA-----GC-----TC-TTC-----AA-----  
-----CAAACCTCTA--GAC-----  
-----AGGTGCGCCCTTATGAATCCA-----CCGTC--TGCCCTTGGT--CTG-----TTTTATA-----  
GGCGTAGCCGCTTAG---TTGGGCCAGA-----GGCCCAATACCAT-----  
-----GGGCC--G--CGGG--GG-----  
-----GTGGGGCGC---ACCA-----CTAATATT  
>EcmlV\_HF921459  
-ACC-----GGTTTCGC-----TGTGGGTCC-----  
-----  
---CACCCACGTGCTTTTG-----TCGGC-----CG-----CAATTGTTGACTGGT-----  
-----CAAAGGTCTTA-----GTATACGT-----  
-----GGCACTAT-----AAATTCCATTAGCAGTGA-----TC-----  
TGGATGAGGAT-----C-----TGAATGTTCTCGAAG-----  
AGGTCATTGGGACATCCT-----AGTACTG-----TTTATGGAA-----TATTGTGC--  
-----CTCCTTGATATTTTGGTGG-----CAGAATATTTTAT-----  
TAATTTTTATTTTTCAT--TTTATT-ATTTTATAAATGGAAA-----AACGTTTCTAC----  
TTCTCAGAAGAACTCCGGACACGTACGGGAAGTTACAG-----GGCTTCTGCACAGAATAC--TTCTTGGGCTT-  
GAT-----GATAG-----AGAAGGCC-----AAGAACT---GGG-----  
-----CCTCTTTCA-----AGAGCCTACA-----  
-----GATACCGTACTCTGAGACA-----  
GGCCTTCAGACA-----ATCTCAGAGGA-----GGAAAGTT-----AAAT-----  
-GGCCA-----T--TAAAGTGGCTCA-----ATTTAATGGAG-----  
-----ATTTGACGGCG-----GCTATAA-----  
ATAGCGCCGATTGTT-----TGGGCTT-----  
-----GAGGC-----CCAAAATATT-----TGGATTACAAATCTCAAG-----  
TGGAGAATGGTGACTACAAGA-----TCGGGA-----CGCAATTACCA-----  
-----GGCCAGGCCCTAAC-----TTGGGCCCGAAAGAAGAG-----  
-AAGGTCTTCAT-----TAGCTCGTTTCG-----ACAA-----  
TAATT-----GGGCCGATTAGGA-----  
GGCCCAATTATCAGTACAAGACCAGAT-----AC--ACACCTCAT--AGGCCT-----  
-----CAACAC-----AAGATCCACTCTCTTAGCCA--GACCC-----  
GGGTTGTTAGCGGATCT-----G-----  
-----ATA-----ATGGATA-----TGG-----  
GTGGCAT-----GTATCTGGGGTTAA-TATTGGATCCGGTTTTGAAGACAGACAC-----  
AGTGACAAGATTAAGA-----TAATTAATCTTAGGTTTTATGATGCA-----  
-----GTAAAGAC-----  
TTCGGATGCTGG-----

-TCAACAGGCATCTTGT-----TACCATAATGTGTA-----CATGTT-----CTTAGTTAGAGATAATT-----  
-----CGGGTGGAGCCCAAGTT--CCAAAGT-----  
-----TTAATTC AATAGTAATGA-----TGGATAATTC--AAACCCA--  
GCAACTGCAGAGGTTGACCACGATAG-----  
-----TAAAGACAG-ATTTAG-----  
-TAT--TGTACGT-----AGATGGAAGT-----  
-----TT--AGCTTT--A-AGGGTAA--  
TTCTTCTAAAAACGGCAC-----CGCATACGACTG-TGCTCG-----  
GAATTTAATT--GATT-----  
-----TTAATAGA-A-----ATGTTA-----  
-----AAAT-----CAA--TTC-----  
-----T--GTTAG--CG--AGTTTAAATCAG--CG-----  
-----A-----CGGATGGTTC-----  
-----ATATG-----CAAATACACAGAAG-----  
-----AATGCATGG-----  
GTTTTGTATATTGTAC-----C-----ACAGATATACG-----  
-----ATTG-----TATTGTAG--ATGGTCATGTAAAAA-----  
-----TAAAATACGTATCTAT--T-----GTAT-----  
-----AATATATTAGCA-----  
-----CGGGGGTGG A-----AA--TTAATAAAAA-----  
-----  
GGGTTTTTTTATTTCTATATGTAATACATTATGTGTACTCCATTCGTACATCTCAGAATTAG-----  
CTAGAGCAATCCTATACGATTGAT-----CGGGATTGCACAATATAATTGTTGGAATCCCTCCTTTA--  
-ATCCTAGTTTTTTTACGGTATTTTTTCATTTACCGTAAAATCTTTCTGACAC--CCTAGTAATCTTT-----T--  
TTACAAGGTAAATACTGAAATG---GA---ATATCATCTATTACATTGTACAAAGCAAATACATCATAAT--TAC--  
-TAAAGTCAAC---ACCTCCACAGTAATAGTTGT---GTCTTCCAAG-----  
ACTTCTGGCCCACGCTGTCTTTCTG-  
TCTTGGAGGGTCCCTCTATTATTAATGTGATTGGTCGATCAGGTTTCTGGTCCCTGAATCATTAATAATT-----  
ATTGGTATATCAATATT--ATTAATTAA-----T-----TCATCATTAATAAATT-----  
CATTTGTT----AAATCATGGGCCATCTAATATCTTCAATAGTTAAATGGGCCCTAA--TAATTGAATTGCATGG-  
GCACTTAC-----  
-----TGTAAG-----  
AGATTTGTT---TCGGC-CCATTGTTGAATGGGCTCGGGGATGCGA-GGAAAATTGACATATCTGGGTTCGAA--  
CACAGTAAT---GGG-----CTCAGGCCAT-TTACTGTTGCTGCATACTC--CAGATTTCTGAG--  
TTGAGTGGCCCAGACATA-TGGTTGCTC-----ATGTTGGACTCG-GGCGAGGAAT--TCGGAC-----  
TTGGATGTGGAT-----TCAGTGAGGATGGCCGCC---AAATTGTAT---CCCT--TGCTTT----  
CTTAGGG--CTTCT--TCTACTTGCCCTAAGT-----  
-----ATTCCCTC--G-----TTCGTCAAATTG-----TCCT-----C-----  
-----CCTT--GGCAATATAGTCTGCC-ACGTC---  
TGCATCTCTTCTTGGGACCTGGCAAT-----TGGGGTGGTAAGTGGCCA-----C-----  
TCCATTTGGGTCCCTT----GA-----  
TGTCGAAGAACCGTTGGTTCGTCGTATTGAACCTCTTGTCATCTGGACAAGGCAGTGAAGGTGTG-GTTCACCGTC---  
-----CTGGTGATCCTCCGTACATACCCTAGCGTATGT--A-----GGGTAAAATTATTT---  
-----AATAATTGATATAAATAATCAATTAAAAAATAGGAAGCAGAGGGCA---  
TTTTGGGTAAGTCAAAAAAATAG-----ACTTACCTTGTAGCCTGAA-----  
-----AGTGC-  
TGTTGGGTTGGCG-----AGGCA-----TATTTTCAAATGACCAAAGGGCAAAA--  
-----AACTG-----CTTATAGAGAAGAGTTT-----TTAG-----  
-----AAAACCTTAC--CTA-----  
-----TTAC--AGG--TTGAGGTGAG-----AAGTG-----  
---AGCAGC-----GTATTA A-----TAATATAAG--T-----  
-----GGACGGCTGAGATGTTGCCACG-----  
TGGC-ATCATCTTATTAGATTACTTTTTCTAAAAGCAAAGGAATCTTTTGTACTGCT-----  
ATTTTTTTGTGCGGTGGCGTGTATGGTACGCTACGTGG-GTGGTCCCTCA-GCGAAACCG-----ATAATATT  
>ECSV\_FJ665632  
-CC-----GCTCC-----  
-----

CCCCCCCCGCGAGCGCGTAGCGCGAGCCCCGCCGGCCTTTTTTCGA-----  
-----  
---ATTAAAGATGTCAGGCCACCTCCCTGC-----GATCGCACCGAGCCAGTC-----  
-----CAGACAATACCTTTGTTG-----  
CTTTGCCATGGCCGGCGCAGTCTGCCGCTTTGCCATG-----  
-----CGGAGGTCCTTCCA-----  
-----CCACAAGACTTAGGTCAGATCCGTTACTTGGTAA-----  
AGCGATTCAAGGCCCTGTCCTTATTAGGACGC-----TTGCGGAACAGTACAG-----  
CGGCAGTTCCTTAGCAGATAAGCTTGAGCTTA-TCGGACGTTCTGTGATACCTTACAACATGAAGCGGAAGAGG---  
AATGAAGCAGTT-----  
-----CCTGCCGGTCGCCGTTATCCTC-----  
AACGGCGTCGTATGTACTACCGTCCTCGTAAGCCTTTCTTCC-----  
-----  
CCCGCCAGTGTACACA-----AGG-----  
-----TCATCCAGTGTT-----  
--AAGCGTCTGCCCTA--CA--GATTA-----GTGGTCTCGTA-----  
TACGGGAACTCTAGTACG-----GGAGCCGTTAAAATTAA-----CACTGG--  
-----AGCTCTTAGCC-----TTGTCACCTGCATTTA-----  
AGGCGGGGACAGCTGAAGAG-----TGCAGGCACTC-----  
TAATCAAATA-----TTGTTAAGTCC-----  
TTTGACATTAGTGGTACTCTATATGTTTCACTCTCCACCAGTTCAAACGTGGACCTGTT-----  
--GTTGTTTACTTCTGGCTAATC-----TATGAC-----  
TCAGAGCCTAGGCAGGCTAT--TCCTA--ACATAACAGATGTGTTC-----  
-----TCCATGCCTTGGACTA-----  
GTGTGCC-----GTCAAGTTGGCGT-----ATATCTCGCT--C--TTCTTCACACCGATTTGTT-----  
-----GTGAAGAGGAAGTGGC-----ATTACGAATTGATGTCAG--  
ATGGT-----GTCCTTCCGCAGAGTA-----  
-----ACACGAAAGTGC-----  
-----AGACTCATAATCCCGTTTCTA-----  
-----GGAACATGATGGACTTTT--CTAAGTACA-----  
-----TCAATAATCTTGGTGTGC-----  
CTACGGAGTGGATGAGTAC--T-----GGAGATGGAACCATTGGTGATATCAAG-----  
-----  
-----AAGGGCGCG--TTGTAC-----CTCGCCGC-----  
TGCCTGCCGACAGGGAATTGTTGGAGATGCAACCAAGAT-----  
-----TACTATAGAAGTCG--AGTTTA-----TCGGGCAGTCT-----  
CGTACT--TATTTT-----AAGAGCATTG-----GCTA-----  
-----  
CCAGTGATTACTTCGCAGCACTATTGAATAAACATGTTGAACATAATGTTGTTGTTTCTGTGAGCCGGGAGGCGCGGT--  
-----  
CCGTCGGGGCCGAAGGCCGACGTTCCGCCGAGGCGGAAGCGGAAGCGCTAGCGCCGTGGAACCATATTTGCCGTTA  
ACATTTCCCTTATTTTAACGCCCTGCGAGGCGGGCGAAGCCCGACGTCATGCGCGCAGCGCCTTACA-----  
-----CAAGATTGAAACACTAACAAGAATTGATACTTTCATCCCATAGTGCCTCATTAG-----  
-----GGCCCATGAG-----  
-----  
GTTACAGTTACAATCCACACACTTATCTAAAATACATTGAGCGCTGTGGCGCTC-----  
---CGAGAACTCAAAAATAAGTGGTAG-----GTATGTTACATGCGTC-----  
TTCGTACTCCTGCTCAGCCCTCGACTTGAAGTGC-----GGCATTGGCATGAATTGATGTACTC--GGCCACAGT-  
-----TACACGG-----CTTGGTCACCTGGATCACTATCTGAAGCCCA-----  
-----  
-----CAT--TGGAGATTCA-----  
-----  
GGGTCATCTTCTCTGGTTTCTCCGCATAGTAAGTGAG-----  
ACTCCGCCAAAGAGAGCATCTTGATATCCACGAAGAGCGCATTTTTGCTAGTCCACGAACGAAGCTGGTGATTCT----  
--CTTACAGTCAAGGAAGGATTTATAGGACTGGT-----  
CCGAGTTACAGAGCACGATAGCTGGTTTACCACCTTTA---  
ACCAGAACCGGTTTCCCATATTTTCAAGTACTTTTCCAGTCTTTCTGAGCT--CCTATAAATTCCTT-----C--  
CAAT-----  
GTTTTAGATATTTAGGGTTGACGTCATCGATGACGTTGTAACCTTGCCCTCGTTGTGCGAACACGGCTCCGTTGAGGTCCAG-  
---ATGTCCGCTGAGATAGTTGT---GACGTCCCAA-----

TGATCTAGCCCAAGCCGTTTTTCTGTACGGGAATCACCTTCAATTAT-CAAAGATAATGGTCTATC-----  
-----  
GGGT-----  
-----AAAGGATCT-GCCCTT-----  
-----  
-----AAGTTATT-----TGCGACCCAGTCAGATAAGACTCTCGG-----TACAGAAAACTGC-----  
TCTCTGA--ATACTTTGG---AACAAATTCAGCTCGTACCTCAGACCAT-ATGCGCCTGGCGTTGGTCAC--  
CAGGTTATGGTG--TTGCAGCCAGAATGTACG-CGGCTCATT-----ATCCTTCACTAG-CTGCAGAGCC--  
TCCTCA-----ATTGAA-----CCTGAATTCAC---CGCC-----TGATGCCAC-----  
CATTCGTCCTG-----CTCAGCCTTCTCTT-----  
-----GCGGCCCGTCAGCCTCTTGTACACATGGTACTGTACCATGTTTCGTAGAAAGATCCA-  
GCTT-----CTTT--CTGTATGTACTTCAGG-  
CTCTT--GGATACTGAACGACAGGTCTCAATCT----TCGGATGGAA-----  
TTCCCC-----GA-----  
AGTCGAATATACGGGGTCCCCTATATCTCTACGCTCACTTGTACATACTATAGCATGAAGATGGT-TGTTACCATC---  
-----TTGGTGCTTTTCTGTGTACGCGTACGTACACGACG-----TGGCTAGCAAGAGTT---  
-----GAGTGGGAAGTGAGGAAGTCTCCACATCCTTAGGCTCTCTTGGGCA---  
TTGTGAGTAAGTGAGGAAGAACG-----CCCTCCCTTGGATCCTAAA-----  
-----  
TCTATGGCTGGATGAAGCCATCCTCAAACCTAGTTTGGTCAAACC-----  
-----  
-----AAAACCCCTGGGTCA-----  
-----ATTGTGAGGAA-----  
TGAGGATTGGGGATGTTATATAGCCTCTGGGTCCCTCTGGGGG-----  
-----GGGGGGAGCGTC-----  
-----  
-----TAAGATT-----  
>EMSV\_JF508490  
-ACC-----GCTC-----GCCCCC-ACCAG--GCCG-----CTGGT-----  
-----G-----AGGCCATTAGGAC-----  
-----GGCCC-----GTCC-----  
-----CCTACTCAAAGGTGACGCCTTTGG-  
GGCAGATCGCACCTTGGGTG-----CT--A-----GGGTGCACCATCGCTTTG-----  
GTGCTTT-----CGGTGCGGTGCCCTTTGCT-----  
-----T-TGTCTATAAGAGGGGAGGCCGAGTGGCTC-----TCCCTCACAAAAGCAAAG-----  
--GTA-----AGGTTTTATGTT-----  
TTGATCCATAGTGCATG--AGT-----  
TCTTTAAGTGGCCCTATTCCTATATCTCCTTGTCTAGCCGTTTCA-----GCAGTAGCTTCGACGG-----  
TGCCCTGCATGCGTTGCT--AATAGCCTTTGTTGG-----CTTGT-----TATTGCTCA---  
-----T---AG---GGAGTTGCTGGGCTGC-----ATTTAGTTTGTTCGGCCGGGA-----  
GTTGCTTGCC-----ATCAGGGCCAG-----ACAGCCCGTAA-----  
GGACGCTGTCG-----CAGGAAGAAGCCAGTTGCCAAGGCCCGCTCCGTC-  
CGCTCCTCTCGAGCCTGTTCTGTCGAGATGGTTTACGAGCGCAAGCG-----  
--GAAAGATCCCCG-----GCGTCTGATGAGTCCG-----  
-----CTGGCTCTGCC-----CG-----CAAGAGG-----  
CCTAGGGCCCCTGC--TGGACGTTCAATGGTTTCGGCCGTTAG--ACGG-----CCGGCTCTT--CA---  
GATTCGGGAGTACCCCTGGCAGAC-CTTGAC-----GCAGT-----  
TGCCTATTAAGATCAC-----CGATGG-----TGTCATTTTCA-----  
-----TGGTGAATACCATAG-----ACCCGGGTACCGGGGATGAT-----  
CAGAGGTCGAA-----GCACCAGACGA-----TGCTGTACAA-----  
-----GATGAGCTTCAATTGCGTTCTCTGGCCG-----  
GACGAGACTACGGCGTTGATTGTTGCC-----CC--TTTCAGGGTTAACTTC--TGGTTGGTG-----  
-----TATGAT-----GCTGCGCCGAGGGGAAACT--GCCGG-----  
CTCTGTCCGACATCTTC-----  
-----AG-----  
CGTGCCTATAACCAAGTGGGGTAATACCTGGAAT-----GTTAGCCGCA---CTAATGTG-CATAGGTTTCGTG-----  
-----GTGAAGCGCAAGTGGCATGTGGATTACAACAGTTCTGGTACAGCCGTTGGGAAGAA--  
ACAG-----TCTCCGGGGTTCGGAGGA-----  
-----TTTCCCCGTGAA-----  
-----GAACG--TGGTCG-----

-----AGTGCA--ACAAGTTCT-----  
-----TCGAGAAGCTGCGTGTTA-----  
AGACCGAGTGGCTTAACAC--C-----ACCGATGGTACTATCGGGTCTGTTAAA-----  
-----AAGGGTGCT-TTGTAT-----TTGGTTGCAAAT-----ACCCGTCAGATGCCTG----  
CTGGTGACGCA-----  
GTCACCACAACCTGTACTACT-TACATGC-----AAGGTTCTACC-----CGATTG-  
TACTTC-----AAGTCGCTGG-----GTTA-----  
-----CCAGTGA-----  
-----TAAT-----  
-----AAAAAAGTTGTTGTTCAAACCTTGACTTTATTCAATTGAAAATTGA-----TACATGGT-----  
GCGCAGTCCGCGCAACG-----AAA--AAAACA-----CACTTAG-----  
-GTTTGTGTGTCGCGAGGGG-GAACCCG-----GAGCACGCACCCAAAC-----C-----  
GTTACAAACATAAA-----  
-----  
ACACAC-----CCAA-ACTACATTTATTAAA-CATCCTGGCCG-----  
GCTGCTTCTGCCT-----  
-----TGT-----AGAACTTCGTTCCCT--C-G-----  
-----TACATGT-----AATGTACGT-GT-----  
-----  
---GAG---TTGGCGTGGA-----  
-----  
-----GG-----  
TACTCCGCCTGAGCAGGCTTCA-TCTCTCCGAGCCAGTCTTC-----  
---GT-----CGTCATTTGTTAAAATGATGGAGGGAATCCCGCCCTTG---  
ATTTTCTTCTTCTTGCCGTATTTTGGGTTACTATGTAGTCGCGTTGGGCA--CCTACGAGTGCCTT-----C--  
CACTGTGGACAGTACTTGAAAG---GG---ACGTCGTCGATGACGTTGTACTCCGCTTGAGGGTCGTAGT--GTG--  
-TGAAGTCTAA---GACGGAGTTGTAGTAGTTAT---GGCGACCTAG-----  
GCTTCTAGCCCAAGTCGTCTTTCCAGTACGGGTTGGTCCACAGATGTA-GATGCTACGTGGCCTG-----  
CCTCCTGGTGC-----TCCATGCTGAT--ATCCT-GCA-----T-----  
TTG---TTGCAGGT-----CATCG-----GCTGC-----  
TTGGGAAATTGATGTGCCAGGATGTA--TTAACGTGTAACATAAC-GGGGTTAC-----  
-----  
-----CTGGAAC-----CATTCCGAA---TTTAT-  
GATTTCCGGTGATGTCTTCTGGG---CACAGAAGTT--GGTCTA---CAGG-GA--ACGGGGAGG---TGT--  
ACTCTACAGGAGGTTCGGGAAC-AGGCTGCTTGCCGAGTACTC--GAATTGCATTAG--TCTGGTTGCCAGTCAAA-  
TGAAATTC-----TTTCCTCACCAT-TGAGAGGTAC--TCTTGC-----TTAGAAGTGGAT-----  
GACTCTATTATGGCACGCATTCGCTGGTCACGTCCCTCTTGGGCAGTTTTCTTT-----  
-----TTC--  
TTGGGAAGTGTGGCTTCCCGAAGATGTATTCC-----TCCCCG-TTTT-----  
-----GCTT--GGTGATGTACCCTAGC-ACTTT--GGAAGCATCTCTTGCTGGTTGGATGT-----  
-TGGGATGGA-----ATTGGTTCCGTG-----  
AAGGAACTGGTCAAGAAGGTTTGTCTACGGGTGAAGAGTTTTTCTCTAGTTGCACTAGTGCATGGAGATGCG-  
GAAAACCATC-----CTTGTGCAGTTCTTGGGTTACATGGATGTATTT---T-----  
GGCTTGTCTGGATC-----AGTAGTTGCAACAGCTCGAGACCTAGATCTTTGCGGGAAAGATCGCA---  
CCTAGGATAGGTTAGGAAGAGTTGC-----TTGGAA-----  
-----GAAATTCGGAACCT-----  
-GGAGCCGTCGGAT-----GAGGATCC-----AAGGGTGTCTTGGTCCT-----GAGACATC-----  
-----TTG-----GTGTCACTG-----GAA-----  
-----CCTGCTCTAG-----  
-----GGGCTCAAAAACCTCTCTAC--TACCTTGCTC--GGC-----GCCGGTG-----  
TCACCCCCCG-----GTGCCCT-----CTTTTAT-AT-----  
-----GGGC--GGGCCGGCTTGTG-----  
-----CGGGGGCGA-GCATGA-----TTAATATT-----  
>ESV\_EU244915  
-ACC-----GCGC--TT-TCTCAT-GCGAGG--CCCA-----CAAGG--C-----  
CGA-----G-----CGGTCC-----  
C-----GGCTAT-GGTGCGTTTGCTTTTG-----  
-----TA--GGGCTGCC-----GTTTCAGAGGGCCG--

CGTTTGAATCGCA-----TTATAA-----GTACTGTCTCCGGT-----  
GCGATCTCTG--CATGGAGAGCTT-----TGAAGGAGCGGGTTCCTTT-----  
GTCCCCCAGGTTGC-----TTTGCCTC-----GTGTCCCCCCCCGCAGTCCGT-----  
CAGTCCCAGTCTGCCGTGGAGT-----AGCGTCG-----  
GTGAGATAGCTATA-----TTCATCTTTGTTGCAGTG--CTAGC-----GCTTTAC-----  
-TTGCTTTGGATCTGGGTGGTGGAGAGATTGT-----CTCTTCGTTGTTAAGG-----CTCGCCAAGGCGGATCAA-  
--CGGAGGAGCTG-CAG-----TTCGG-----GCCCA-----G---GG---  
AGCGC-----CCACCTGTCCCTGCTGGT-----GACAGGCCTCC-----  
TTTGCCTCCGG-----C-----TGTATCGGTTGCTACTACCAGTGAGACTAGACC-----TTTCTCGGTCTAGTC-  
G-GCCTTACG---CATGCCTCT-TACCGCCG-----GGAAACG-----  
-----GAAGA-----G-----G-----  
TCAGGTGATGCGT-----CCAGTTCCTAAGG-----TTGCTC--  
-----GGCCGAAGCTCGGG--CGTTCATCTGCCGC--CCG-----TGCTGGTAAACCTAGTAC--TAGG-  
GCTCGT--CCATCCCTG--CA---GATCC-----AGACGCTTACG-----  
GCGGCTGGACAGTCAATG-----ATATCTGTCCCG--TC-----TGGTGG--  
-----CGTTTGTGATT-----TGCTTGGCTCGTTTG-----  
CCCGAGGATCCGATGAGGGC-----AACCGCCACAC-----  
CAACGAGACTG-----TAACATACAA-----  
GGTAGCCCTCGACTAT--CATTTTCGTG-----GCTACTGCAGGTGCCGCAAGTATTCA-----AG---  
TATCGGCACTGGCGTGGTGTGGTTGGTG-----TATGAC-----  
----GCACAGCCTCAGGGGAACTG--TCCCC--AGGTAAAGGATATTTTC-----C-----  
-----CGCATCCTGATTCCTTGAGCG--  
---CCTTCCC-----GTATACCTGGAAG-----GTTGGAAGAG--A-GGTGTGCCACCGGTTCTGTG-  
-----GTGAAGCGGCGATGGC-----TGTTACGATGGAGACCA--  
ACGGG-----AGGATTGGTTCGGATAC-----  
-----CCCTGGCCCTAC-----  
-----CAGTTGCTGGCCCCCGTGCCG-  
-----CAAGAACATTTACTTCC--ACAAGTTTG-----  
-----AAGCCGGCTTAGGGGTGA-----  
AAACGGAGTGAAGAACAC--T-----ACAGCGGAGACGTCGGTGACATTAAG-----  
-----  
-----AAGGGTGCC-CTGTAT-----AT--TGTAATT-----GCCC-----  
CAGGCAATGGG-----CT-----CGAATT-  
-----C-ACCGTGC-----ATGGTAATGCT-----CGGTTG-TACTTT-----  
-----AAGAGTGTG-----GGAA-----  
-----TCAGTGAGTCCCA-----TGA-----  
-----A---TAAT-----AAAACCTGTT-----  
-----TTAATATTTGTATGATTATTAC--GCCGAAGGC--GTTGAAT--TACACAGTCCGCCGATGG-GCGGAC--  
-----AGAA--AATACA-----CACAAAC-----CAAAATAGGCGGTGAG--  
-ATCGT-GGC--GGATAAGGG-----ATAGCG-----A-AGGAA-----AAAAATAAAACAAA-----  
-----  
-----CCAAAC-----  
TGACATTATT-ACA-TTGGTCGGCGC-----TCAGACTTCGATAGAAGGATG--  
-----GGCT-----GTAGCTGACACCGCTGGCCCCCGCA-  
-----AGAACCGTTCACCCG--G-T-----TCAAGGA-----  
-----TGTATACAG-TG-----  
-----CAG---TTTGCATTGA-----  
-----  
-----AA---TAGTCCTGCTGTGCAGGCGTCA-  
TGTCCTTACCCAATCCTC-----AT-----  
CCACATTGGCAAGCACTATTGTGGGGATGCTTTTCTTGCCACCTTCTTGCCTTCCCATATTTAGGGTTTACAATGTAA  
TCTTTTTTGGCAG--CCAATTAAGTCTT-----C--CAACATGGACAGAAGTGAAG---GG---  
ATGTCGTCTATGATGTTGAAGACTGCGTCCCTCGTCGTATG--AGG--TCCAGTCGAC----  
GTTGTTCTGCCAGTAATTAT--GTCGTCCCAG-----  
GCTTCTGGCCCAAGTGGACTTTTCTGTTCTTGTGGGCCGAGGATGTA-GAGGCTCTGCTTCCTT--GTTCTGGA---  
AT-----ATTCTGGATGT--ATGAG-ACA-----T-----CCA-----  
TTCGAGGT-----CAAAGGCT-----GCATC-----TTCAAGGCTTAAGCAGTCTGGATTCA--  
GGAGCATGTATGCTTGG-GGACTAAC-----  
-----



-CTGGTAT-----ATGTTGGTG----TAAAC-CCAGGACTGGATAGTTTCCCCA----TCTTGGAGCTGTGGTGCTG--  
-TAGGTGG--ATGTGGGTT----GGTGTACGTTTCCCTGTATCTCAGGAAAC-AGTCTGTTGGCTGAATACTC--  
AAAGTATTGTAG--CTTGGTTGCCATTTCGTA-AGGGAGTGC-----CTTCTGTATCAT-AGAGAGGTAC--  
TCTTGC-----TTTGGAGGTGGAG-----TGTTTCGATGATATCTCTCA-----CGATATCAT-----  
CCTTGGATTGCTTAG-----TGGTGTTCCTCTGAGGTAGAGCCAAGGAAGGTTTTCT-----  
-----TCC--TTGG-----TATGAATGT-----ACCTCTCTCCCACACCTTCAGT-  
GGGT-----TCTT--CAATACGTAATCCCTT-  
ACCTT--GTTAGCACTCTTTCAGCTTGTATGT-----TGGGGTGGT-----A-----  
GTCTTC-----GA-----  
TGTCGAAGAACCTTTCATCATGGGTGTAGACAGGCTTGACGCTCTGAGCTAAGGCATGCAGATGCC-ATGACCCATC---  
-----TTGATGAGCTTCCCTACTCACCACGATGTATGC--A-----GGAGTCCA-TGACTC---  
-----TAAGAGACTCCATAGCACCAGACCTACGACTTCAGGCTCTAAGGTGCA---  
GTGAGGGTATGTCAGGAAGGTGT-----TGACATTGCGGTGCTTGAA-----  
-----GCGACGCGTAG-----  
GAGCTGAA-GGCACAGTT-----GATGC-----TATGCTCGACATCTCTAC-----  
TGCTGGTC-----TGGAA-----TGGAGGC-TCC-----  
CAA-----CAAACCTCT--CCT-----  
-----AC----GGTTTGCGAATCGAAA--TAACGCA--CAGCTGCTGC-----  
-TTTATA-----GTACTC-TAGGTGGG--TTGGGCCTAA-----  
TGAGTTTTTT-----GGGCC--G--CAAT-----G-----  
-----  
-----AGAAAGCGC-AAACCA-----ATAATATT  
>FbSLCV\_JX094280  
-A-C-----GGTTGCGC-----GTGTGGGCCC-----  
-----  
---CAC--AGCCTTATCG----TGGGG-----CC-----  
CACGTTTTGGCTTTTAGTCGAAGCGT-----AAGCAAGACGTCATGTC-----  
-----GGCCCCAC-----AGCAATAT-----AAA-----  
AGGAA-----CCA-----CAGTTGAGGAT-----C-----TGAATGTTCTCGTAG-----  
-----AGGTCATTGGGACAAC-----GTGTGG-----TGTATGGAA-----  
TATTGCTC-----AGAATTTATATTCTGGTGG-----GAAGCCGCTGT-----  
--T-ATTGTAATTGTTTGGTTTTATTGATTTATATCAATGGAAA-----GTCGCTTATAC-----  
TTAATCGAGGAATTGCCAGAGACGTACGGTTCGTTTACAG-----GGATTTTGCACAGACTTA--TTCTGGGCCG-  
GAT-----GATAC-----AGAAGGCC-----AAGACGA--AGG-----  
-----ACTTACGGG-----AGAAGTAACTC-----  
-----GTTACAGACTACTCAGACA-----  
GTGTTACCGCCA-----ATCCCAGAGAC-----GGAAAGAG-----AAAT-----  
-GGGCCA-----T--CAAAGTGGCCA-----ATTCAATGAAG-----  
-----ACCTTGCCACT-----ATTATAA-----ATAGGGGTAGA-  
-----TGGGCCT-----CTG-----  
AA----GAGGC-----CCAGAACTCC-----TAGCGTACAAAAAAAAA-----  
TAGAAGATGGCTCGCACAAGA-----TCGGGG-----AGACAGTATTC-----  
-----GGCCCAGGCCCATC-----TTGGGGCCGGAAGAAGAC-----  
-AAGAAC-----ACCCCGTTTCG-----AGACCTACAC-----  
TGATT-----GGGCCGATTCGAA-----  
GGCCCAATTACCAAATCAAGACCCGCT-----AT--GCCCCCAG--AGACCT-----  
-----CAGACT-----AAGATACACTCCTTGTCTGC--GGCAA-----  
GGGTTGTATCTGGGTCG-----G-----  
-----ATA-----ATGGTTA-----TGG-----  
ATGGCAC-----ATCTCGGACGTTCC-TATTGGATCGGGCTTTGAAGATAGGCAT-----  
AGTGATAAAATTAGAA-----TTTTAAATTTAATTTTAAGTTACA-----  
-----GATGAGGAC-----  
TTCTCAACAGGG-----  
-ACAGAACACGTCATGC-----TGGCATAACGTGTA-----TTTGT-----TTTAGTTAGAGACAATA-----  
-----GTGGAGGAACAGCTGTT--CCGAAAT-----  
-----TTAATTCAATATGTATGA-----TGGATAATTC--CAACCCT--  
TCCACTGCTGAGATTGACCATGATTC-----GAAGGATCG-TTTCAC-----  
-GAT--TATGAGA-----AGATGGAGAT-----  
-----TC-----CAGTTC-----A-AAG-----

AAACAGCACATCTGGATCCGTTGCTTATGACTG-TGCTAG-----GAATACTTAT-----  
GATT-----  
TTAGGAAA-T-----TTGTTA-----AATT--  
-----AAG---TTC-----  
-----A---ATTAC--TG--AATTTAAGAGTG--CT-----A-----  
-----CAAGTGGATC-----  
-----TTATG-----CTAATACGCAAAAAG-----  
-----  
-----AACGCTTG-----GTATTGTATTTTGTT-----  
-----C-----TCAGACGTACG-----  
-----ATAT-----GACTGTTG--ACGGTCATTGTACGA-----  
TCAAATATGTATCAAT--T-----GTGT-----  
--  
AATCAATTAATAAAAAATAATTGAATTATGATATCGCTATCAATCATCACACGCTATAATACCAGATAATCAGAAAAACG  
ATACGATAATAGTAATATAATCAAAGTCGAAGACTTTTAATTAA---TTAAAAGAAA-----  
-----  
-----  
GGATCTTTTATTTCCACATGAATTACATTGGATAAGGACCATTTCGTACATTTCACTGCCCA-----  
TTAATGCAGCTTTGTATGATTGAT-----CTGGATTACACAGTACAATGGTTGG-----A--  
-ATTCTACATTTTTTTCTATATTTTTCGTTGACTGTAAAATCCTTTTGACAT--CCTAGTAATTTCTTT-----T--  
TTACATGGAAGAAAATGAAAAG---GA---ATATCATCTATGACGGTGTAAGTAGCAAAATTATTCACA---CAC--  
-TAAAATCAAC---ACCCCCACAAAATAATTAT--GTAGACCCAT-----  
GCTCCTGGCCCATGCTGTTTTGCCTGTTTTGTGGGCCAAACAATTATTAGAGTCACTGGGCGGTCCGGTCTCTGATCC  
TGAA----AATGATTGTACAACAGGATCTTCAGAATT--ACCAATCCA-----T-----  
TCATCAGTAATAAAGT-----CTTCTGTT-----  
AAATTATGAGCCCATTCATATCTGTTACTGATATTTCTGGTTGAAC---TAATTGCATGGATTGA-AGACTTAC-----  
-----  
-----TGTGAAT-----AAGTTGGTG-----  
TCTGC-CCATTCTCTAATGGGCTCGGGTACATTATTGAACACTGTC-CATTTGGGAATGTA--CACACTAGG----TTG-  
-----CTCTGGCCAC--TTACTATTTGCTGCATATTC--GAGATTTTCGTAA--TTGAGTTGCCCAGACATA-  
TGTTGCTC-----AATCTGGACTCT-ACCGAGAAAC--TCGGAC-----TTGGAGGTGGAT-----  
TCATTGATGATGTTTGTCC-----ATATTGAAT---CCCT--GCTCTT---CTTAGGG---CTTCT---  
TCTACTTGCCCTAAGT-----ATTCCTC--G---  
--TTCCTCAAATTG-----TCCT-----C-----  
-----CCTT--GGCAATATAGTCTGCC-ACATC--AGCATCTCTTCTTGGGACCTGGCAAT-----  
TGGGGTGGTAAACCCAG-----T-----TCTGTTTGGGTCTGA---GA-----  
TGTCAAAATATCTCTGTGATGTGGTGTGAACCTCTGTCCAGTTGGACAAGACAGTGAAGGTGTG-GCTCACCCTC---  
-----CTGGTGATTCTCCGTACAGACCCTAGCATATAT--A-----GGATTAAAATTCTTT---  
-----AATAATTGATATAAGTAATCAATTACGAAAAGTGGAGTTAAGGGGCA---  
TTTTGGGTAAAGTCAAAAAAATAG-----ACTTACCCTGGAGACGGAA-----  
-----GGAGT-  
TGTTGTTGCGTCG-----AGGCA-----T-----GATGCGTATA-----AAAA--  
-----TAATG-----GTAATAGAAGGGAGCTCAAGATTCGATTTG-----  
-----GCAATTCCTT--ATT-----  
-----CTAC--AAGGTTTTGCGTGAG-----AAGTG--  
---AGCTCCCTCCT-----GTTGCGTTATA-----TAATACAAA---T-----  
-----GGACGGCTGTGATTTATCCACG-----  
TGTCTTTCATCTTGCGAGCCGAC-----  
AAAAGTGAGTGGGTACTTTTACTTTTATTAATAAAGTTGTTTGAATGCGGACCGAAG-----  
TCCGTAGTGCGGTTCTCACGCGCAACCT-----TTAATATT  
>GCFaV\_JQ901105  
-ACT-----GGCACTTCCCATGGTACG-----  
-----  
TGGTATTCTTGCGGAGCAAGTTTCTCTACTTTGGCAAATGCTTC-----  
-----  
TGATTGGTTGGTGTGGAATTTATTCTTTTCTTTTGTGCGCCACTTGCCTGGCTTTTACGCGAAGCT-----  
-----  
AAAGTGGCCGCATATATGTTTTTTAGTTAGGGTATATTATTAATGGAGGATCGATGCGGGTGGAAACGCACTTTGGCTGT  
TGTGCTAATTTCTCTCTCAATATTTTGGGTGTTGTACTGGTTAGTATCTTCTCTCGTCGCATTTGTAAGAGGAATCGGA

ATGGTAACACTGAACAAACGGAATCGCGTTCCTCCTGAGTGCGATTCCCTGCAGTTCTAGTGAAAGTCTTTGAATGATA-  
-----  
TTGATATTTGTGGTGTATGATGATGGGTTAGGGGATGAGGCTTTAGACGCTGGATCCGTTTATTTCGTCGTCACAGAACTG  
TTA-----GTTTCGTGGCTAAAGATGTTCTTTTAGATGACTGTGATT---  
CAACGATATTGGATATATCGTTGCCTTCTGCTTTATGG-----  
TTTTTGTGCGAAAAGATATTTGACTTG-----  
-----  
TTGTTTGAGGAAAAGAATTACTGCCTCTGCCAGGTATATCCGAGAAACAGACTGTTTTATTGCGACAGCTG-----  
-----ATTAGGCGTGTGCTCGTCGTCATTGTTTATTACTTACAAGTGCAGGAGT-----  
-----GTTTTGAGGGTTGTTG-----AAGATAAAGAAG--  
-----  
GATGGTAATGAAAAAAGGAGCCGCCAACGGAAGCAGAGAAGAAGGCGCAGGACGACTGGGAGGAGTCTGCCGTAAGGC  
GGCGTGCTCGGCCTCGTAGAGCCT---TGTC-----GTTTGCATTCC-----  
--ATG-----GGAATTC---T-----TGGGG-----  
TACCCCTTCCCTTTTT-----TTTTGACTCCGATTG-----  
CTTTAGGTACTGGTGCAGAA-----GACAGAA-----  
CAGGTCCAGTA-----TT-----  
GACTGTCAGCAGTATGATTTTGAAGGTGTTGTGCTTCCGTCGACAAATGTCACCGATGG-----  
ATTGCATGATATTTATTTTGGATAATT-----TTGGAT-----  
---CGTTTTCTACTGGAAGTATCCTTCGG-----TATCTGATATATTC-----A-----  
-----  
CTGGTAGTGATAACAGCGGAAGCATGATTGAGAC-----ATTGACGAGGAATCGTTTGAATCGTAAGAG--  
-ATTTTCGTATTTTGGGTTTCGAA-----GAACTTGTGTTGGC-----  
-----GTGAATAAGA-----  
-----AGCCGCAGGAGT-----  
-----  
-----CATTGCCA-----CATTACGTGCAGCATTTAATATTTTTC-----  
-----AAAGACGTCGTCTGG-----  
-----TTGTCGCTTTTAAAACGACGT-----TCTGGTGGAGGACGTAATGATGTTGA-----  
-----  
-----AAGGAATCGTATTTAT-----TTGTCTGC-----GGCTT-----  
---CTGCAAGTGG-----CAT-----  
-----ACGTTT-----AGATTG-----  
TATCTAAATGGAATTGTAACTTTTATAATGGAGTTATTT-----TCAATAGACCACGCTGTTTA-----  
-----TTATGGC-----  
-----  
GTGTGTATGATCAAGTTTCTGAGTTTGGTTTGTATGATGGTGGTGAAGATGTTGATATCCCCATTGTTGGGGATGATGAA  
GATGAA-----GAAATGGTTACAACCTGGATATGGT-----  
GAATTCGTTAAGACGTTGAAGAGACGT-----CGATCTGAGCGCGGAGAGGTGA-----  
CAAAGACTTACAAGCGAAGAATTGCATTGACTGAACCTGATCGTAGTAGA-----  
-----  
ACTGAAGTTGAAGAATTGAGAGATTATTTGTTAGAGGAAGATTATGATAAGCATAGAAGACGT-----  
-----CTGGACCTGGAGCTAGGCTCA-----  
GGCTTGATAGTCCAGACAGTCGTTGTACAGTAA-----  
TGTGAATGTTGTATTTGGATATTTGAATAATAGAATATGGTGCAGGAGTTTATTA-----  
AAATTATAATGTAAACACT-----TCGAAATAAA-----  
-----  
TCACACTTCAATACCAGACAATCAGGCACGATTTCTTTTATGAAAGAACCAGCCGCGAAGCGGCTGGCTGACCTTTTATT  
TATCAGTACAACGGTCTATCAATTTTACAAAGATAATGTTTTCTTCAGCCACGGCTTGAATGTTGCATGCCAATTGGT  
GATTGCATCATAGTAAGAGTTAT-----CTGGATTACAAAGAACAATTGATGGGATCCCTCCTTTG---  
ATTTTCCGCTTTGGACGATATTTTTCATTTGCAATGTAATTGAATTGACAA--CCTAATAAGGCTTT-----T--  
TTACAAGGCAAATATGGAATGGT-----ATATCGTCAATAATATGTACAAAGCGTCGTCTATGTATA-----  
GACTGAAGTCTAC---TGATTACACCAGTAGTTAT---GTATTCCCAA-----  
TGACATAGCCCATGCGTTTTACCCGTCTTCGATGGTTCCTTCAATCAC-  
CAGGCTCTTCCCTCCTTCGGTGCCTCGCTTCT-----  
GCATTGTTGAGTTCATCGTCAGTGTATATATTTCTTTCAACATAATCCAAGTAATACGCGTCCAGCTTGTCGT-----  
---

CTATTATATGTTGGACGCGTTTTGTTTCTTGTTCAAGGAAATTGTTTATTCCTGGTCCAAGGTTTCGTTGTGCTGAGCTT  
TTGCGTAC-----  
-----CACGTAG-----  
AGTTCGTT----TTGGACCCAGAGATGAATTTCTGGTGGAAAGGTTATTCCAAGCTGT-----  
CCACTGATT---GGCATGTGGGGTAGGGGTGGGAGGCCAT-GTTTGAGCAACAAAGTATTC--AAGTCGTTGTAG--  
ATTGAGGACGTATTGGTA-GGGGTAATG-----TTGTTTGACGAG-TTGCAGAAAC--TCGTCT-----  
----TTGGAA-----TTTGCAACT-----CGTAGGAAT----  
TCTCCAAAATCCAGTTCCTCTGGATTGCTTCT-----  
-----TTGATTTGAGAGTTGGCTTTGTACCGTGCTCGACGGTATCT-  
CCTT-----CTTT--TCCGACGTAATTAAGC-  
ACGTC--GGCGACATCTCTGGGCTTTGTGATAT----TGGGGTGATAG-----  
GAATGAGACGATATGGT-----GA-----  
TGTCAAAGTGTGTTGGATTGCGAATAGCCTGTCGTTTTTTGAAGATGAGCAAGGCGTGTAGGTGTG-GCTCGCCATT---  
-----CTGATGTTTTTCTTCTCCGATGAGAGCGTAATC--T-----AGGGTTTTGTGG-----  
-----AACTTGATTTGAAGAAGTCTAGGGCAAACGTGTTTATGGACTGGGCA---  
CTGAGGGTATGTGAGGAAGAAGT-----TTTTTGAGCGGAGATTGAA-----  
-----  
GGAGCTACTTGATGCCATCTTGGTTGTATAAGATGGGTTGGTACTCTTTATATAGTGGTTGATTAGATGACATCAGGTGA  
TGTCAGCTATTTTGTGTTTATTATCC-----  
-----CCAATTCTAGCTTAT-----  
-----AGTTTTGGTGGTATT-----  
-----TTGGTACTCAGGGCAAATTTGTATTGAA-----  
-----GTGCCAT-----  
-----ATAATATT  
>HrCTV\_U49907  
-ACC-----GGATGGCCGC-----  
GATGCTACCACGTGTC-----  
-----TTAAA-----ATTGTTGGC---TGGT-CAAAAGTGGC-----  
-----GGCGA-----CCG-----GTTT--  
TATAAAGTAAAGTAAA-----GTAGACCCCACTA-----  
GGAAACTTGGTTCGGCAAGTTTAACTTTATCCTTTTAA-ATAAATACGGTATTTGTACATATATTTATATATGT-----  
-----ACAAATGATGGTATGTCTACCAGACTGGGTATTCCTACTATT-----CAT-----  
-----AGCTAGTATTC-----TTCTACAGGCTTGTA-----CGAATTTTTATGGGACCTTTCAC-----  
-----AGTGGGTCAATTTCCAAGAAATATCCAGCCTTGTTAGCCGTTT-----C-----  
-----GACGAGTTG-----TTTTTT-----CA-----GATA---CAACAAGTGGTGTAT-----  
-----ACTAG-----GTATCCGTC-----ACGAAGT---CGAATCGTTAAC-----  
-----  
CCTAGAAGAAGGGGAAGCCTTTCTGGGATTCAGAAAGGAGGTGAAGAAACTGTT-  
GAAGCGTAAGTGTACTTTTTCTAGAAAGTGTGAGTTGTATGAGGAGAT-----  
ATACAAGAAATACTTATCAGATGGGCCAGAAAGAAAGGCT---  
CCCTACCAACCGTATGGTTCGAAGAAGAGGAAGACT-----GGGCCATGAGAAAAAT-----  
ACCAATG-----GAAGAGGCCTGCTCGC-----AAGACGAAGGCCCTGAAATGAAGATG-----  
-----TATGATGATA-T---GCT-----  
TGGTGTGTTGGATTG-----GGTTCTACCATTAGCAA-----TAATGG-----  
-----TATGATTACTA-----TGTTGAATAATTATG-----  
TCCAGGGTATTGGAGATAGT-----CAACGGTCTAC-----  
TAACACGACTA-----TTACGAAGCA-----  
TATGAAGTTTGATATGGCGCTAATGGGCAGTTCAGTTTTTGGGATACTCCAAATTACAT-----  
-GACTCAATATCATTTGGATTATC-----ATAGAC-----  
AAGGATGTTGGTTCGGTGTTCCTGTTA---AGTTGGATGATATATTT-----G-----  
-----ATATCCATCAAATGGTCAAG-----  
CTATGCC-----TTCTACTTTCCGC-----ATTAGGAGAG--A-TAGTAATGAGAGGTTTTATT-----  
-----GTGAAGAGGAAGTGGACTACAC-----ATTTAAT---  
GTCTACTGGAGCAG-----CTTATGGTAGCAAGGA-----  
-----TATTTACAAGGG-----  
-----  
TCCTTCTATGCCTAATTACAA-----GAAGGGTATGAACATCAATATTC-----  
-----GCAAC---TTGAATGTGA-----

-----AGACTATATGGAAGGATAC--T-----GGTGGCGGGAAATACGAAGATGTTAAG-----  
-----  
-----GAGAATGCTATACTTT-----ATATTGT-----TGTTAATGATAA-----  
TGCCGATAAATACT-----AA-----TAT-  
GTATG--CT-ACATTAT-----TTGGCAATTGC-----CGATGT-TATTTTTATT-----  
-----AATA-----AAAT-----AA-----GTAATG-----  
-----TAT-----TTTAAAGAATGTGCTTGGGTTCCCTA-----  
CTTTTGC-----  
CCTGCCATGTCCCTTATCCTTAGGGTTTAGTTTTGAAGCAGAGCGAGCGCAGCGAGCGTAAACAACCCGAATAAACGGA  
CTA-----GGCTTTGATCTATAAATGCAGGGCTTTAGCC-----CTGCATTTCTAGACAAAAGGCGTCAAT-----  
-----AGACTGTTAACTAACAGTTATAGTATCA-----  
AACGCAATGAACCCGAAGGGTTCACAAAAAAGCAAGCGTAACTGTCAAGT-----  
AGCGCGCAGAAGGGGAAAAATCAAGATACACAAAAAGGAAGACAATATATTAACTGCGCTTCTTTATTAAAT  
AGAACTTTAAGAGTAGTACAATAT-----  
GAGTCGACGATTTCTAAGATGTTTACATCGTATGTAAGTAGAGCAAGATTGAAAGAAGATCCTATTTGTTCTATGTC---  
--CAGATGAGTTATATCGTCTACTCTGAAC-----AAGATA-  
CGTACAATCCTTATCCATTCATCGATTACCAAACCAAAG-----ATTGG-----TCTGAACGA-  
--TCAAGAAGAAA-----AGAAAAATAGTAAAGT--CATAAATGATCC---  
AGGTGGTACTGTCCCTCCCTCG----GCCTT-CGATAACCTTGATTTTCAAAGTGTA--A-----  
-----  
-----AGA--TCCGGCTGCT-----  
-----TCTTTGTTGCTTCGATCTCCCATATTGT-----  
GCGCCTGAGATTTTTTATTGAATATTTAATGGATTCCATTGTCGA-----  
-----ATAATGGAGTATCCAGGAATATAAAAATGGCATTATATAATGTCCATTGTCTCAAGCCGTCATTTT---  
---CAGGCTTGTCTAAAAAATCTCGAAA-  
GCTAGATCCCTCACCAGGATTACAAAGTATAATGGTGGGGACCCCTCCTCTA---  
ATTTGAACCGGTTTCCCGTATTTGCAATTGCTTTGCCAGTCCCTTTGGGCC--CCGATGAGCTCTTT-----C--  
CAAT--  
GCTTCATCTTCAAGTATGTCGGGGCTACGTCATCTATGACGTTATATTCACCTCGTTGGAATACACGCGCATGTTGAAG  
TCGAG---GTGTCCACACAAGTAGTTGT---GTGTACCTAA-----  
CGCTCTTGCCAGCAGCTTTTTTCCCGTTCTACTGTTCCCTTCTATGA--TAATGGATTTGGCCTTAT-----  
-----  
GGCT-----G-----  
-----TCGG--CA-ACAGGCCT-----GC-----  
-----  
CAA-----GTAATCA-----TCGG-CCCACTCTTGCAATTTCTTCGGGGACGTTTGTGAAGGAG--G-----  
AGAGAGG--ATACGGCGG---ATTCCAGGGTCTGGTGGTTTCGCGAAT-ATGTGTTCAAGGTGGCTTT--  
TACATTGTGATG--TTGAGTCACGAATGTCTT-TGGATCCCC-----AGCCTTTATGAT-GTCAAGAGCC--  
TCTCGT-----ACACCT-----CTGCATTGAC---GGC---GT-TGTGG-----  
TAGACGGCGTCCCTGTTTGTCTTT-----  
-----GTTT-CCCCAGAGACCTTGTATT-----GTCCGGAT--TCACAATAATCA-CCTT--  
-----CTTT--GGTGTGTAATCTTG-ACGGC---  
ATTGGTGTCTTTGGCTGATTGGACAT-----TAGGATGGAA-----AG--  
AGGTACTCCGTTGGGGTGAGTAA-----  
TGTCGAAAAATCTGCAGTCCCTTGATGTTGGACTTTCTGAAAGTTGTATAAGGCAGTGGAGGTGCG-GTGTTCGGTC---  
-----GGCGTGTCTCTCGGCGGCGACTCTGATATATGTTGGT-----TTGACGACTGTCCAG---  
-----TTGAGGTTTTGAAGCAGTTGAAGCATTTCATCTTTTGGTATTGTACA---  
CTGAGGATAAGTGAGAAAAATAT-----TTCTTGCTTGAATACGGAA-----  
-----AGAAT-----  
TAGGCTGTCTTGGCATT-----  
TTGAACTGGGACTCCA-----  
-----GG--TTTTAGGTTT-----  
-----AATCCTGTATATTCGTGGA-----  
GTTCTGGAGTCTC-----ATTTATACTA--AAACCTCTTAAGCCAATA-----G-----  
-----CGGCCATCCGTT-----  
-----  
TAATATT  
>HYVV\_AB236325

-ACC-----GGATGGCCGC-----  
-----CCGAAATTT-----  
GT--GGTGGTCCCCCTCTG-----TCGGC----CAATGAATATCGTGC-----  
-----ATTGAA-----TGTT--  
AGATAAGTGGAAAGTGACATGTGCTTTTGTCTTTAT-----ATACGTCAGCCCTAATTT-----  
-TAAGGGTGTAAG---ATGTGGGATCCTTTAGTTAACGATTTCCCTGAA-----  
ACCGTTCACGGTTTTAGGTGTATG---TTAGCGGTTAAGTA-----TCTCTTA-----  
CTTGTTGAATCTACGTATTCTCC-----GGATACCGTTGGTTA-----CGATCTAATACGCGAT-  
CTTATC-----GGGTTGTTCGTGCCAAGAACT-----ATGTCGAAGCGTCC-----T-----  
-----GCAGATATA-----GGAATTTTACACCCG-----TCTCAA-----GGTA-----  
CGGCGCCGTCTGAAC-----TTCGA-----CAGCCAGTC-----TGCCAAC---  
CGTGCGAGTGTC-----  
-----CCCA-----  
TTGCCCTCGCCACAAACAAAAGAGATCATGGGCTCAAAGGCCCAT-GTATCGGAAGCCAG-----  
-----GAT-----GTACAGAATGTACAG-----  
-----AAGCCCTGATGTGCCTA-----GGGGGTGTGAAG-----  
-----GCCCTTG-----TA-----  
AGGTCCAGTCGTATGAGAAGAAAATG-----ATGTAGGTCATTCTGGCA-C---TTT-G-----  
-CTTTGTGTCTC-----TGATATTACCCGTGGCAAC-----GGGCTCACTCATCGTGT-----  
-----TGGGAA-----GAGATTT-----TGT--ATAAAGTCCG-----  
-----TTTATATTATTGGTAAAATA-----TGGATGGATGA-----  
-----AAATATTAAGA-----CGAAGAATCA-----  
CACGAACAACGTGTT-----ATTCGGTTAGTTAGAGATAGACGTCCCGGT-----  
-TCAACG--CCTTATGGCT-----  
-----TTCAGGAGGCATTC-----AATATGTTT-----G-----  
-----AGA-----  
ATGAACC-----CAGCACGGCTACT-----GTCAAACAAG--A-ATTAAGAGATCGCTTGCAA-----  
-----GTCTTACATA---GG-----TTTAGT-----  
GCAACTG-----TTACTGGTGGACAATA-----  
-----TGCATCTAAAG-----  
-----  
-A-----ACAAGCCGTCATCAAGAGGTTCT-----  
-----GGAAG---TTGAATCATC-----  
ATGTGACTTACAATCATCA--G-----GAGCAAGCTAAATATGAGAATCATACT-----  
-----  
-----GAAAATGCCTTGTTAT-----TGTATAT-----GGCCTGTACTCA-----  
TGCCAGTAATCC-----AGT-----  
GTATG--CT-ACATTA-----AAAATC-----AGAGTG-TATTTCTACG-----  
-----ATTCAGTA---CAA---A-----  
-----TTAATAAAGCTTGAATTTTA---TA-----  
TCAGTAA-----ATTGTT-----GTACA-T-----ACTC-----  
AGTTCCTCTAATACATCA-----TAC-----  
AATACATGATCAACTGCCCTAATTGTTAATTGAAATTACACCC-----  
AAATTATCTAAGTACTTCAACACT-----TGTGTCCTAAATACCCTCAAGAAATGC-----  
AAAGTCTGAGGATGT-----AA-----GCGAGTCCAA--ATCTTGAAAGAGAGGAA-----  
-----GCACTTGT-----GTATGTCCAGTTGATTCCCTGAG-----  
-----GTTGTGGTTGAATTGTATCTGTAAAGTTAT-----  
TATATCCTGATCCATGTT-----GAA--TGGCCGTTGAGCGTGTGTCGTGATTTTGAATATAGGGGAT-----  
TGGGCACTGTCCAGGTATA-----CGCGC-----CATTCCTGCCTGAGCTGCAGTGA-----  
-----TGGT--GTCCCCTG--TGCGTGAATCCA--TGATTTGCACAC--CCTAATG-----  
-----CGACGTAAATAGAACACCCG-----  
-----CAG--TTCAGATCAA-----  
-----  
TTCTCCTCCGGCGAGGTGCT-----  
CTCCTCTTCTCTGATCTGTGTCGCACCTTGATGG-----GTACCTGAGT-----  
AGAGTGGGCCGTAGAGGGTGACGAAGGTTGCATTTTTAATTGCCAGGCTTTTAGGGCAGCATTCT-----  
TTTCCTCGTCTAAATACTCGGTGTATGATGACGTTGGG-CCTGGATTGCAGAGGAAGATTGTTGGGATACCGCTTTA--  
-ATTTGAATTGGTTTCCCGTACTTGGTGTGCTTTGCCAGTCCCTTTGGGCC--CCCATGAACTCTTT-----A--  
AAGT--G-----  
CTTTAGATAGTGGGGATCCACGTCATCAATGACGTTGTACCACGCTCATTACTGTAAACCTTGGGGCTTAAGTCAAG--

--ATGGCCGCAAAGGTAGTTATGACGTGGACTCAG-----  
AGACCTGGCCACATAGTCTTCCCTGTCTGCTATCCCCTTCTATCAC-AATACTCATGGGCCTCCA-----  
-----  
CGGC-----C-----  
-----GCGCAGCG-GAATCCCT-----G-----  
-----  
-----ACGTTCTCG----GCAG-CCCATTCCTCAAGTTCATCTGGAACCTTGATCAAAGGAA--G-----  
AAGAAGA--AAAAGGAGA---AACAAATTCCTCCAACGGAGGAGCAAAA-ATCCTATCTAAATTACTATT--  
TAAATTATGAAA--TTGTAACAAAATCTTT-GGGAGCTTT-----CTCCCTCAATAT-AGACAAGGCC--  
GATGAC-----TTA-----GATCCTGAATTGAT----TGCCTCGGC-ATATGCGT----  
CGTTGGCAGAC-----TGGCAACCTCCTCTA-----  
-----GCTGATC--TTCCATCGACTTGGA AAA-----CTCCAAA--TCAATGACGTCT-  
CCGT-----CTTT--CTCCATGTAGGCCTTG-  
ACATCTGATGAGCT--CTTAGCTCCCTGAATGT----TTGGATGGAA-----AT--  
GTGCTGACCTAGATGGGGATACGA-----  
GATCGAAGAATCGTTGATTTGTGCATTGGTATTTTCCTTCGAATTGGATGAGGACGTGGAGATGAG-GGCTCCCATC---  
-----TTCGTGTAGTTCTCTGCAGATTCTAATGAATAA--T-----TTATTTGTTGGTGT---  
-----TCTAGGGCTTGAATCTGGGAAAGGC'TTCTTTGGTTAGAGAGCA---  
GTGTGGGTATGTGAGGAAATAAT-----TTTGTCTATTTATTTTAAA-----  
-----ACGTT-----TCGG---  
TGGTGCCA-TATTTACAAATAT-GCCC--TT-----GTACCCCGATTCGGAGAGAA-  
-----  
-----AACTTCTT--TGC-  
-----TGTGAA-----TCGGGTGTA-----TGGGGTACA-----ATATATAC-  
-----TCCTC-----CTTCTTTTAAATTT--GAAT-----  
TTCAAATTCAAAATTCAAATTGGT-----AAAG-----CGGCCATCCGTA-----  
-----  
-----TAATATT  
>MaMPRV\_AY044133  
-ACC-----GGATGGCCGC-----  
-----GC-TTTCCCT-  
-----TCCTTTCCGTA---C-ATC-GCATGGAAT-----  
-----GCTTTAA-----TTTG-AATT-----  
-----AAAGAT-----GACTTTGTTTG-----CGT-----  
-TGTCCAAT-----CATGTGTGTGCTGGA-----AAGTTAAAT-----TATTT-----  
AACTTGGTCTTTAAGTT-----TAT-----  
GACTTTTGGTTA-----TAAATTCAAATTAATGTA--CC-----TGTGTGACAGTGC-----  
TTTAATTCGACATGCCTAAGCGGGA-----T-----GCCCGTGG-----  
CGTCTTCTGCGGGA-----CCTCTAA-----GGTT--AGCCGTAATTTGAAT-----TAT-  
-----TC-----TCCC GG--GG-----AGGC-----  
-----  
-----CAA---AATCAA-----CAGGGCCAATGCATGGGTTAATAGGCCCAT-GTACAGGAAGCCCAG--  
-----GAT-----ATATCGGATGTACAG--  
-----GACTCCCGATGTTCTA-----  
GAGGCTGTGAAG-----GACCTG-----TA-----  
AAATCCAGTCGTTTGAACAACGCCATG-----ATGTGTCTCATATTGGTA-A---GGT-T-----  
-ATGTGTATATC-----TGATGTTACACGTGGTAAC-----GGTATTACTCATCGCGT-----  
-----TGGCAA-----ACGTTTC-----TGT--GTTAAGTCTG-----  
-----TTTACATTTTAGGCAAAGTT-----TGGATGGACGA-----  
-----CAACATCAAGT-----TGAAGAATCA-----  
TACCAACAGTGTAAT-----GTTTGGTTGGTTAGGGATCGAAGACCATAT-----  
-GGCACT--CCTATGGAAT-----  
-----TTGGTCAAGTATTT-----AATATGTTT-----G-----  
-----ATA-----  
ATGAGCC-----TAGCACTGCTACT-----ATTAAGAACG--A-TTTACGAGATCGTTTCCAG-----  
-----GTCATGCACA--AG-----TTTTAT-----  
TCAAAGG-----TTACAGGTGGACAATA-----  
-----TGCAAGTAATG-----  
-----  
-A-----ACAGTCGCTGGTTAAGCGATTTT-----

-----GGAAG---GTTAACAACC-----  
ATGTTGTGTATAATCATCA--A-----GAAGCTGCTAAGTACGAGAACCATACT-----  
-----GAGAACGCATTATTGT-----TGTATAT-----GGCATGTACACA-----  
TGCTTCTAATCC-----TGT-----  
ATATG---CT-ACTTT-----AAAATT-----CGGATA-TATTTTTACG-----  
-----ATTCGATA-----ATGA-----A-----  
-----TTAATAAAATTTGAATTTTA---TT-----  
TCATGAT-----TTTCAA-----GCACG-----  
---TCATTTACATAA---CTTCTGTCC-----  
GTTGCATATGAGACAGCTTTGATTACATTGTTAATTGAAATAACTCCT-----  
AAATTATCTAAATAAGACAGTACA-----AGGTATTTAAAT-CTATTTAAATAAAT----  
CTGCCAGAAGCTGTCTGTC--AA-----TGTCGTCCAG--ACTTGGAATTGAAGAA-----  
-----GGCTTTGT-----GGAGAGCCAACGCTTCCCTCAG-----  
-----GTTGTGGTTGGCTCGGATTTGAATG--TCG-----  
AACACCGTGTCTGTTCTGTTG---ACAT--TGGCTTCTCCACGT---TGATTATTTTGAATAGAGGGAT-----  
TTATAATCTCCCAAATAAA-----AACGC-----CATTCGTTGCTTGAAGTGCAGTGA-----  
-----TGGG---TTCCCCTG--TGCGTGAATCCA---TGATTGCGCAA--CTAATAT-----  
---GAATGTATATTGAACAGCCA-----  
-----CAC---TCTAGATCTA-----  
-----  
ACCTTCTACGTCGAGTC-----  
TGTCTCTTGGCGTGACGATGACGCGGTTTGATTG-----AAGGTGGAGT-----  
AGAGTGGTTCCCTCAATGGAGACGTAGATGGCGTTTTTCTGTGCCAGTCATTGAGTGATTTGTTTT-----  
TCTCTTCGCTGAGATACTCTTTATA-TGATGAATGGGGCCAGGATTGCATAGGAAGATAGTGGGAATTCCTCCTTTA--  
-ATTTGAATTGGCTTCCGTATTTGCAGTTTGATTGCCAATCACGTTGGGCC--CCCATGAACTCTTT-----A--  
AAGT--G-----  
TTTCAGATAATGCGGATCAACGTCATCTATGACGTTATAACCATGCATGATTGGAGTAAATTTCTCGGGTTGAGATCGAT--  
--ATGACCACATAGGTAATTGT--GAGGACCCAG-----  
ACTTCGGGCCCATATTGTCTTGCCTGTTCTTGATGGTCTTCAACGAT-GATTGATATAGGTCTCAA-----  
-----  
CGGC-----C-----  
-----GCGCAGCG-GAA-----TC-----  
-----  
GGAA-----ATATTTTCG---TTAA-CCCAGTCCGACATAATTAAGGGACATTGTTGAAAGTG--G-----  
ATAACTG--AAATGGAGG---AACCACCGTTCGTTGGTGGTGTGAAT-ATTTTCTCCAGATTAGAACG--  
GATGTTGTGATA--TTGGACAACGAAATCTTT-TGGCTGTTT-----TTCTTTTAATAC-CGTCATTGCA--  
GCTTCA-----ATACAA-----TCTGCATTTAA---CGCTTTTGC-ATATGAGT---  
CGTTTGCAGAT-----TGTTGTCTCCTCTT-----  
-----GCAGATC--TACCGTCGATCTGGAATT-----GGCCCAT--TCAATGGTGACT-  
CCAT-----CCTT--GTTCGATGTATGCTTTA-  
ACATC--TGAAGTGGATTTAACTCCCTGTATGT-----TCGGATGGAA-----AT--  
GTGTTGACCGTGTGGGGATACCA-----  
AGTCGAATAATCTTTGATTTGTGCAGACGAATTTTCTTTCGAACTGAATAAGCACGTGAAGATGAG-GTTGCCCATC---  
-----TTCGTGTAATTTCTTCGCAAATCTTGATGTAATTT---C-----TTATCTGTTGGAGTC---  
-----TGTATATTAAGCAATTGTGAGAGGGTTTCTTTTGGAAATAGAACA---  
TCGAGGATATGTGAGAAAGTAGT-----TCTTTGAGCTCACTCTAAA-----  
-----TCTCT-----TTGG-----  
TGGTGGCATT-----TTTGTAATAAG-----GCGA-TGTCACCAATCGA-G-----  
-----  
-----CTCTCTCAACTCT-----  
-----CTCTAT--TGTATTGGTGAC-----TGGTGTACA-----  
ATATATACTA--GAGGGCTCTATAGAAGTATTATCTCTTTCGTACAC-----  
-----GTGT-----AGCCATCCGTTA-----  
-----TAATATT  
>MiSC\_D00800  
-ACC-----GCTC-----CCCCTC-CCTGG---CCCA-----TTAGT-----  
-----AGGCCCTTGCCCTC-----  
-----GGTGCGCGGTGCCTTTGGTCC-----



-----CCGTTCC-----  
TTGCCGCCTTTGGCAGAAGATCGCACTCAGGCTG-----CTGTAA-----  
AATGGCACCGCCATTTGA-----GTGTTTT-----  
TGCTTTGGTGCCTTTGGTT-----TGCGGCTTTAAAAAGAG-----  
GCGGAGGCTCAGA-----GATCGCAC-CAAAACCAAAG-----GTAC-----  
-----GCAGGTTGCTTGTC-----TTCGAACTTGGGTCATTA--AGTTTTGCTTCG-----TTTGTAAG--  
-----TTTTTATGGATCCCTATGGTAGCCGTCCTA-----GCCATCCTGATGATGG-----  
TGCACTGCATGGTATACT---TGTGGCATTATTTGC-----GGTGC-----TTTGCTCA---  
-----T---AG---GTTGCCTTTGGGCAGC-----ATACCGACTGTTCTTAAGGA-----  
GTGCCTTACTG-----ATTGCAGTCAG-----CACGCTTCATCA-----GG--  
CGTCGTCG-----CGGGTCCTCGTCCGGCTGCAA---CAGGTCTAC-TGCTGTTGTTGTGCAT-----  
AATGGT-----GCAGAAGCG-----CAAAGATCTTCG-----  
-----GCGTTCTGAT-----G-----CCGGTTCTGCCG--  
-----TTCGGGC-----CAAACG-----CATAAGGCCTCGAC--TGG-----  
GAAGGCCTTCCCTGTAGG--GAAG-----CGGGCTCCTCTGCA-----  
GATACGGTCTATGCATGGGAGACGCCTGCC-----ACGGCGACCACCCCTTCC-----  
GGACCTATCAGTATTAC-----TGACGG-----CACCATCTTCA-----  
-----TGTGTAACACCATTG-----ACCCTGGGACTGGAGACGAT-----  
-CAGAGATCGCG-----GCATACCACGA-----TGCTCTATAA-----  
-----GATGTCATTGAACGTGGTGCTCTGGCCT-----  
GGTGCGACTACGGCCCAAATAGTTGGG-----CC---TTTCCGCGTGAACCTC---TGGCTTGTG-----  
-----TATGAT-----GCTGCCCGACTGGAGTTGT---CCCGA---  
AGCTGACGGACATCTTT-----  
-----GA-----  
CGTGGCCTATCCGAAATGGGGAAACACTTGGCAG-----GTTTCCCGCT---CTAATGTG-CATAGGTTTATA-----  
-----GTTAAGCGTAAATGGAAGGTGGACTACCAGTCCCTCTGGCGTCCCTGTTGGCAAGAG--  
ACAGA-----GCAGCGGTGTT-GAAGA-----  
-----CGCCCCTGTTAA-----  
-----TAATG--TGGTGG-----  
-----AGTGCA--ACAAGTTCT-----  
-----TCGAGAAGCTGCGTGTGA-----  
AGACCGAATGGGCGAACAC--C-----TCTACCGGTGCAATTGGGGACGTGAAG-----  
-----AAGGGTGCG-TTGTAC-----CTGTGTGCCAAT-----ACCCGGCAGATGCCTG---  
CTGGTGACTCA-----  
GTCACCACGAGTTGTACCACC-ATGATGC-----AAGGGTCTACC-----CGATTG-  
TACTTC-----AAAGTGCTGG-----GGAA-----  
-----CCAGTAA-----  
-----TAAT-----  
-----AAAAA-----CTTATTTATTATAAATTGCAAACCTGTGG-----  
ATTACATGATAATGTGAGCGCATTATGCGGACA-----ACA---  
AACTCAAGAAATTACATAA-----ATTTGGGGG--GTAGGGGC-AAAGCAGGC---  
GGCTATGGGCGCGCCCAGGGC-----A-----ACACACTTAAA-----  
-----AAAAAC-----ACAACAATAGATTTACT-----  
CTTCGGCCG-----GCAG-----GG-----  
-----CGT-----  
-AGAACTTCTGTCTT--C-G-----TACATGT-----  
--AATGTACGT-GG-----  
-----GCG--TTTGCGTGCA-----  
-----GG---TACTCCACTTGTGCAGGTTTCA-TGTCCTTGATCCAGTCTTC---  
-----GT-----  
CGTCATTGGTTAGAATGATGGACGGGATTCCCCAGGG---  
ATTTTCTTCTTCTTGCCTACTTGGGATTCATATGTAGTCACGCTGTGCT--CCCACCAGCGCCTT-----C--  
CACTGCGGCAAGAACTTGAAG---GC---ACATCGTCGATGACGTTGTATATTGCATCTTTGTCATAGT---GTG--  
-TGAAGTCTAC---GGTTGAGTTGTAGTAGTTGT---GCCTCCCGAT-----  
GTTTCTGGCCAAGTGTCTTTCCAGTTCCGGCTTGGGCCGAGATGTA-TATGCTTCGTGGTCTC-----C-----  
GCGG-----CCCGTTAGGCT--GTATT-CAA-----A-----CCA-----

CTGTTGGT-----TTGTA-----AGTAT-----TCAAGAAATT-----  
TGAAAGAGTGAAGCTTAATCGGTA-----GTTAC-----  
-----CTGGTTC-----CATTCCTGG---TCTAT-GATGTCAACGAGCTCCGGCGGA----  
CAGACGATCT---GCTCAT---TTGG-GT---ACGGTGACT---GAT---  
ATACCGGAGGTGGTTCGGTAAACAAGGCTGC-TGCACTGTATTC--AACTGTTGGAG--TCTGATGGCCAGTCAAA-  
TGGGAATTC-----TTTACGGACCAT-GGACAGGTAT--TCATTC-----CTATTGGTGGAG-----  
GAGGCTATTATCATAGCCATCCTTTGATCACGTGTAGGCTTCTCAGGTTTCTTG-----TTC--CTGA-----  
GTTGGAGTTC---ACCCATTTTCATCAGAATCACCG-TTGG-----  
-----TTTT--GGATATGTATCCGAAA-ACCTT--TTCAGCATCTCTGACGGGCTGAATGT-----  
TTGGGTGGA-----A-----ACCCTG-----AA-----  
CATCAAAGAACTTGGGGTTCCTTGTGCATAGTTGGTGTTTAGCTGTATAAGGACATGGAGATGCG-GGTCCCCGTC---  
-----CTTATGGAACCTTGGGATACCTTAATGTATCC--T-----GGAATTTTCTCGGTC---  
-----AGGCGAGAGAACAATTCCCTTCATCAGCTCGGATGGTGTAGGTTGCA---  
GTGTGGATAGGTAAGGAAGAATTGCTTGCTGTTCACACGTGGTGTGGAT-----  
-----GTTTTGAAGGACCA-----  
-GGA-CGGTTGGATGCTGCAGATGATGC-----A--GGTGCCCTCATCTC-----TACTACTC-----  
-----TATGG-----GTGTGGCTC-----CGA-----  
-----TGCTCTCA-----  
-----G-----AAAACCTTGCTAC--TGGTTTCGCT--GGT-----GCCGGTG-----  
CCACCCCTCGTTAGA-----TGGGCTGCG-----TATTTATAAT-----  
-----GGGCC--GG-----CG-----  
-----GGGAGCGA-A-ACCA-----ATAATATT  
>MSRV\_JQ624879  
-ACG-----AGCGT-----T-TTAAGGG-CCCG-----  
CGACTGCGA-----CGGCCA-----  
----CATGGCCCTGTATGTGGACG-----GAGCGCACT-----ACAGGTAAAGCGGGAG--  
GGAATCCCCCGTG-----CAATAA-----TTAG--ACTTTCCGAG-----  
TCATTCTTTATTAAAGGAGAGGTTACCCGTCAGAACGTGATGGAGGCGCCCTCGACGTTGCA-  
GGTATACCCTCAGCCCTTGAGCCTTGTAACCC-----AGTCTCCGCCGGCA-----C-----  
CCACCGCCGGCGATCCGTGGTTC-----CGTGTCG-----  
TC-----TTTGTGTTGGTTATTGCA--CTCATCTGCTTAGGTATCGTGAC-----  
CTGTCTTATCGGTGGTTCATCAGAGATGTC-----ATCATACTGCTTAGGG-----CGAAGAGACAGCGGAGCA--  
-CGGAATATATT-GGT-----TTCGG-----CAATACTCC-----A-----  
-----GCTAGGGCC-----GACGGTGGATT-----  
CCCAATCCACG---GACGAGGAAGTATAGGCA-----GGGCCCTGTTCTCCTGTCTAGGGCAGGG--  
AAGCTCTTAG-----AC-GAGCTTCA-----  
GGAAGAGCTCTACTACGAGACCGATGGCAGGGAGTTCGCGCAAGAGGACCCGTCG-----  
----G--GGGGACGAGGTGG-----CCTGGAACCTCGA-----  
AGAGATC-----CAGTTGAG-----CGCTCAACGGAACCCCTCG-----  
AAGAGGGTCCCCAGAAATCCAAGG-GTGCGC---CCAGTCTC---CA---GATCC-----  
AGACAATTACC-----AACGGAAGCTCAAGCATG-----GTTCCGGTTAAG---CA-----  
-----ACCGGG-----GTACTGTGGTC-----TCCTCGGGACTTATT-----  
-----CCCGAGGCTCTGATGAGAAT-----CAGAGGCACAC-----  
----CAGCGAGACTA-----TGACGTATAA-----  
AATAGCGTTAGATCTG---CATTTAGT---ATTACTTCTGCTGCCGCTGCTTATAGC-----AA---  
TTCAGGTAAGTGGGCTTGTGGCTGATT-----TACGAT-----  
----TCACAGCCGAACGGAGCTCA--GCCTA---CGTTGAAGGACATCTTC-----G-----  
-----CTTACGAGGATTCACTGGTAG---  
---CGTGGCC-----ATACACCTGGAAG-----GTCTCAAGAG---A--GGTCTGTCATCGCTTTGTG---  
-----GTTAAACGGAGGTACA-----CGTTCACACTCGAGTCAA--  
ATGGA-----AGAAGGAATGATGAGCA-----  
-----GCCGCCATCAAA-----  
-----CTCAGTTTGCCGCCTTGTA--  
-----GACTCACCTGTACTTCC--ACAAGTTCG-----  
-----CTAAGGGTTTGGGCGTGA-----  
GGACGGAGTGAAGAACGA--T-----ACAGCCGGTAGTGTGGTAACATCAAG-----

```

-----
-----AAAGGAGCA-CTGTAC-----AT---AGGTATA-----GCTC-----
CAGGTAACGGG-----GT-----TGAGTT-
-----T-AATGTGT-----TTGGCAAGACC-----CGTCTG-TACTTC-----
-----AAGAGCATTG-----GAAA-----
-----TCAATAA-----GAA-----
-----AGTGTATT-----
CAAATAACCTGGTACTCCAGGTTATTATGTTCGTG-----
TACAAAACACTGAGTACATAGAGGTCGCTTGC-----GACCAAAGAAAA-----CACACAT-
-----GAAGAAGGGCGGACAGGAC-AAAGCAGGC---GGCATAACGGGCGCG--ATAGGG-----
-----GCAACACACTGAAA-----
-----AAAAAT-----CACACAATAGTAATGAAA-TCACTC-----
-----CCTAAGAGGGAG-----
-----TGT-----AGAACTTCTCATGAA--G-T-----
-----TCCATCT-----GATACACAA-CG-----
-----CAG---TTGTCTGATAG-----
-----AG-----
-TACTCCAGCTGAGCTGGAGTCA-TCACCTTCAGCCAGTCCTC-----
-----AT-----CGTAGTTGACGAGAATGATCGAGGGAATGCCTCCCGGTACTTCCATCCTGCGTG--
CATACTTAGGGTTAACGGTGTAGTCCTTCTGCCCC--CCGACCAGCTGCTT-----C--
CAGCACGGGCAGAACTTGAAGG---GT---ATGTCGTCCAGAACGTTGTACTTGGCAGACTTCTGTACT---TCA--
-GGAAGTCCAC---CCCGTCTGCCAGTAGTTAT---
GGTTCACTGGGTGATGCTCCGGGCCAGGTAGTCTTGCCCGTGCCTGTAGGCCAACGATGTA-
GAGGCTCCTTGGTCTTGAGGTGCGTGTAGCAG-----CATCCCCCTGG--TGCAT-
TCG-----T-----CCA-----T-CCACTT-----CAGGGACTCTGCAGCTTG-----
-CTCTACAGATTGACAGTGAGGATGTT--CGAGCATGTAGATGTAT-GGGTGTAC-----
-----
-----CTGAAAG-----ATGTTCTCG---TCCTT-
CCAGGATCGGATGGTCTCGTAG---CATGTCAGGTCGGGCTCTG---AGGGTGG--ATGAGGTGG-----
CACGAAAGGTGATGGTAGTGTGGGAAG-AGTCGTTCTGCCGAGTACTC--GAACTGTTGCAG--
TTTAGTAGCCCACTCGAA-AGGGAAGGC-----CTTCTGGACTTC-GGACAGGTAC--TCAGCC-----
TTGCTGGTTGTG-----GTTTCGATAATGCCACGCA---TTATCTCGTTACGCTTTGGAACA-----
-----GGGTACTCCCGTAACCGGCTCCTGATGTG-----
CCGGCTC--TGGG-----AATGAAAGT-----ACCTCTGGAGTAAACGGTGATC-GGAC-----
-----TCTT--GAGGATGTACTCTCTA-GTCTT---
GTTAGGACTTCGAGAAGCCTGGATGT----TAGGGTGGT-----A-----ACCCTG-----
-----AA-----TGTCAAAAAACCAGGATCCCTAGTAGACATAGGACGAATAGTCTGTAGCAAAACATGAAGATGTG-
GAGTCCCATC-----CTGGTGAGACTCAGAAGAAGCAAGAATGTAAC---A-----
GGAGTCCAAGGACGT-----GCGACCTCCAGAGATGCTGCCCTGCCTCGAACGGGGTGAGGAGGCA---
GCGGGGGTAAGTGAGGAAGGCAT-----
TTGCAGACTTGAAC TGAAATTTTCGTCGTGGTGGATCTGGTCCCACAG-----
-----GGTGTCTGCTGGAGGAGGTCATCCTCCTCAGAGGGGTA-GTCAGAGCCAGGC-----
AGAGGTGTGGGAACCTCAGCCTGAACGGAGGGCGTAGGCACGAAGTGGTTGCC-----
GAACGCACTCATGCTCTGGGACTTGGTTCGCACCA-----
CGGGGCAAGGAGGCTGAGAAGATACTCAGCTTCTCAACTCTAT-CCCT-----
-----TACCTGCGTTTTTTGTTTCCG-----CCTCACA--GCTTCTCAGCAAGCGT-----
ACTTATA-----GTACGCCATGTTGGG-----
CCTT-----AAGTCCAGGCGCGGC-----C-----
-----CAAAAACGCGAAA--A-----ATAATATT
>MSV_AF329881
-ACC-----GCGCCTTCTTTTCTT-GCGAGGG-CCCG-----GTAGGGCC-----
CGA---G-----CGATTT---
GATGTAAAGCTTGGTCTTGCTTTGTATGATTTATC-----
-----TA---AAGCAGCCC-----ATTCTAAAGAAACC--
GGTCCCGG--GCA-----CTATAA-----ATTG---CCTAACAAGT-----
GCGATTCAATT--CATGGAT-----CCACAGAACGCCCTGTATT-----AT-----

```

-----CAGCCGC-----GGGTACCCACAGCAGCTCCGG-----CATCCGCAGGAGTGCCGTGGAGT-----  
CGCGTAG-----GCGAGGTAGCTATT-----  
TTGAGCTTTGTTGCACTG--ATTTG-----CTTTTAC-----  
CTGCTTTACCTTTGGGTGCTGAGAGACCTT-----ATCTTAGTTCTGAAGG-----CTCGACAAGGCAGATCCA--  
-CGGAGGAGCTG-ATA-----TTTGG-----  
-----A-----GGACAAGCTGTGGATAGGAGC-----AACCCATATCCC-----  
TAATCTACCAG-----CACCACCAAGTCAGGGC-----  
AATCCCGGGCCATTTGTTCCAGGCACGGGATAAGCAATCAG--CCATGTCCAC-GTCC-----  
-----AAGAG-----GAAGC-----G-----  
-----G--GGAGATGATTCGA-----ATTGGAGTAAGC--  
-----GGGTGCC-----TAAGAAGAAGC-----CCTCTTCAGC--TGG-----  
GCTGAAGAGGGCTGGAAG--CAAG-GCCGATAGGCCATCCCTC--CA--AATCC-----  
AGACACTCCAG-----CATGCTGGGACCACCATG-----ATAACTGTCCCA--TC-----  
-----CGGAGG-----AGTATGTGACC-----TCATCAACACCTATG-----  
-----CCCAGGATCTGACGAGGGC-----AACCGCCACAC-----  
-----CAGCGAGACTC-----TCACGTACAA-----  
GATCGCCATCGACTAC---CACTTCGTT-----GCCGACGCGGCAGCCTGCCGCTACTCC-----AA---  
CACCGGAACCGGTGTAATGTGGCTGGTG-----TATGAC-----  
----ACCACTCCCGGCGGACAAGC--TCCGA---CCCCGCAAATATATTT-----G-----  
-----CCTACCCTGACACGCTAAAAG--  
---CGTGGCC-----GGCCACATGGAAG-----GTGAGCCGGG--A-GCTGTGTCATCGCTTCGTG--  
-----GTGAAACGGCGATGGT-----TGTTCACATGGAGACCG--  
ACGGG-----CGGATTGGTTCGGACAT-----  
-----TCCTCCCTCGAA-----TGCAAGTTGGAAGCCTTGCAA-----  
-----GCGCAACATCTACTTCC--ACAAGTTCA-----  
-----CGAGCGGGTTGGGAGTGA-----  
GAACGCAGTGAAGAATGT--A-----ACGGACGGAGGAGTTGGTGCCATCCAG-----  
-----  
-----AGAGGAGCG-TTGTAC-----AT--GGTCATT-----GCCC-----  
CCGGCAATGGT-----CT-----TACATT--  
-----T-ACTGCC-----ATGGGCAGACC-----CGTCTG-TACTTT-----  
-----AAGAGTGTTG-----GCAA-----  
-----CCAGTAA-----TGA-----  
-----A--TAAA-----AACTCCCGTT-----  
-----TTATTATATC--TGATGAATGCTGAAAG-----CTTACAT--TAATATGTGTCGTGCGATGG-CACGAA--  
-----AA--AACACA-----CGCA-AT-----CAATACAGGGGGGTAG--  
-TAGGCGGGC--GGCTAAGGG-----TGGTG-----CTCGGC-----GGCAGA-ACATCGA-----  
-----  
-----AAAATC-----  
AAGATCTATCTGA-ATGTA CTGCCT-----CCG-----TAGGAG-----  
-----GCAGCTCAGGGGGAGAAT--  
-----ACCACTTCTCCCCCG--G-C-----GACATAA-----  
-----TGTAATGA-CG-----  
-----CAG--TTGCCTCGA-----  
-----  
-----AA--TACTCCAGCTGCCCTGGAGTCA-  
TTTCCTTCATCCAATCTTC-----AT-----  
CCGAGTTGGCGAGGATTATTGTAGGCTTAGACTTCTTCTGCACCTTCTTCTTACCATACTGGGGTTTACAATGAAA  
TCCCTCTGACAG--CCAATAACTGTTT-----C--CAACAAGGACAAAATTTAAACG--GA-----  
ATATCATCTACGATGTTGTAGATTGCGTCTTCGTTGTATG--AAG--ACCAATCAAC----  
ATTATTTTGCAGTAATTAT--GAACCCCTAG-----  
GCTTCTGGCCCAAGTAGATTTCCGGTTCTTGTGGGCCGACGATGTA-GAGGCTCTGCTTTCTT--  
GATCTTTCATCTGA-----TGACTGGATAC--AGAAT-CCA-----T-----  
CCA-----TTGGAGGT-----CAGAAAT-----GCATC-----  
CTCGAGGGTATAACAGGTAGGTTGAA--GGAGCATGTAAGCTTCG--GGACTAAC-----  
-----  
-----CTGGAAG-----ATGTTAGGC-----TGGAG--  
CCAATCATTGATTGACTCATT-----CAAAGTAAATCAGGTGAGG--AGGGTGG--ATGAGGATT-----

GGTGAACTCTTCCTGAATCTCAGGAAAA-AGCTTATTTGCAGAGTATTC--AAAATACTGCAA--  
TTTTGTGGACCAATCAAA-GGGAAGCTC-----TTTCTGGATCAT-GGAGAGGTAC--TCTTCC-----  
TTGGAAGTAGCG-----TGTGAAATAATGTCTCGCA-----TTATTTTCAT-----  
CTTTGGAAGGTTTTTTTTTTCCTTAACCTTCTGAATCAGAT--TTTCTAGGAAGGGGGACT-----  
-----TCC--TAGG-----AATGAAAAGT-----ACCTCTCTCAAAAACAGCCAGA-  
GGTT-----CCTT--GAGAATGTAATCCCTC-  
ACCCT--GTTTACTGATTTGGCACTCTGAATGT-----TTGGGTGAA-----A-----  
CCCATT-----AA-----  
TATCAAAGAACCTTGAGTCCGATATCCTTACCGGCTTCTCTGTCTGAAGTAATGCATGTAAATGCA-AACTTCCATC---  
-----TTTATGTGCCTCTCGGGCACATAGAATGTATTT--G-----GGAATCCAACGAACA---  
-----ACGAGCTCCAGATCATCTGACAGGCGATTTTCAGGATTTCTGGACA---  
CTTTGGATAGGTGAGGAACGTGT-----TAGCGTTCCTGTGTGAGAA-----  
-----CTGACGGTTGG-----  
ATGAGGAG-----GAGGC-----CATAGCCGACGACGGAGG----  
ATGAGGCT-----GAGGG-----ATGGCAGACTGGGAGC-TC-----  
-----CAAACCTCTAT--AGT-----  
-----ATA---CCCGTGCGCCTTCGAA---ATCCGCC--GCTCCCTTGT-----  
-CTTATA-----GTGGTTGTAAATGGG---CCGGACC-----  
-----GGGCC---GGCCCAGCAGGAAA-----  
-----  
-----AGAAGGCGC---GCA-----CTAATATT  
>ODV\_AM296025  
-ACC-----CT---CC-----GTGGCCCCCCCC-----  
-----G-----AGGCCCA-  
CGTGGCTTTTTCGTACGTGGGCCGAGG---CCGCTAG-----  
TGCGCGGTCCCGGATAAGATGCTGATTGTGTCA-----  
CTGTACACTTATTGTGATTGTGTGCAATCTGCACCAAATGGAATCTGTGATAACTTAGACTATAA-----  
-----GTAAGGATGATT-GCGAA-----GCA-----TATGGATGGAGATTTCCAGTATACCC-----  
CGCCTCTACCATATA-----GAG--ATCAGCTGTATACTGC-----  
TCCCG---TCTCTACGG-----AGTCTTC-----TGACTTAGCCT-----  
GGCGAACCTTTGTG-----TTCGTGATATTTGGTTGC--TTAGTTGCTGTAGGCATCATTAT-----  
-CTGGCTTATACTCTTTTTCCTGAAGGACTGC-----ATTCTTGTCTGGAAGG-----CTAAGAGACAGAAGAAGA-  
--CGGAGGAGATT-GGA-----TACGG-----GAATACCC-----GGC--GC---  
GTC-----CTCAATG-----  
-----ACTGATTTAAAGTC-----  
-----TAAGGGGAA-----GCGTAAGC-----GGGATGAG---GGGG-  
-----AGTCAT-----CTGGAAGATG-----GAAG--  
GGAG-----CCGTATAACAAGA-----GGCGTAA-----  
GACCCAGTACA-----AGGTTG-----TACCTGTCA---  
GGCCACCGGCTCTC---TG---TGTTCT-----TCCGTCAGCAG---TGGATTACTCCGGACAAG--  
-----CAGAGTGTGG-----TTGTTACCAACACTCCGAGGATTGATC-  
-----TTATTACATGCTTTG-----CAGCTGGGAAGGGCGATGAT-----  
-----AATCGCCATAC-----TAACCAGACCA-----  
TCATGTACAAGTTTCACCTGCA-----GGGGAGTGTGTAC-----  
GTGGCGGATGCTTCTCCAAGTTCGTA-----ACTCCGTTGAGGTT--GTATCACTGGCTCGTC-----  
-----TATGAC-----GCCGAGCCTAAACAGGCCAT--GCCTG---  
GTATTGAAGACATCTTC-----  
-----ACGATGCCTTGGAATGTCCTG-----CC-----  
ATCCACATGGACC-----ATCTGGAGAG---C-CTGGGCTCACCGGTTTCGTA-----  
GTGAAGAGGAAGTGGC-----ACGTAGACCTCGTCTCAG--ACGGC-----  
-----AAGAAGGTTGGGTCGTCCACCGCTGA-----  
TACGCGGTATAA-----  
-----CTACGTAG-----TAGG-----GAAGAA-----CATAGTCG-----  
-----ACTGCA--ATAAGTTCA-----  
-----TCAAGGGTCTCCGTGTAT-----CCACGGAATGGATGAACAC--G-----  
GGTGATGGCAAGATTGGTGACATTAAG-----AAGGGAGCG-CTGTAT-----  
CTAGT---TACATGT-----ACTAGGGCTGGAGTCA---CTGGTGACTCT-----  
-----GC---ATCCAC-----T-GGTTTCA-----  
GTGTGGTCTGTAACCTGACACATGCGTGTATTTTC-----AAGTCCATTG-----GACT-

-----  
GCAATAAATATATA-----TATATA-----TTTCTGGTT--  
-----ACA-----ATC-----  
-----T-----TATTAC--AT--CGGCTCAGCTATGAGC-----A-----  
----AAGACAAACCAAAT-----TATCACAAA-----  
CATAAAACACACCTTACA-----CAAATATATC--AC-----AACGAAATA-  
-----  
-----CAACACCCTGAGATATTATGTTTATAA-TGA-  
TGTACGCCGTCCGCGCTAGGA-----CAGTCACTGCGAAGCAGTGGCCCC-----  
-----TTCA-----CCG--AAGGTGAAGGAATGG-----  
TTGATAAATGTCTCACCAT--C-T-----TCCATAT-----  
----AGTGGATCT-CG-----  
-----GCG--TTGGCGTACA-----  
-----  
-----AA---TAGTCCGACTGCAGGGGAGTCA-TGTCCTTCAGCCAGTCTTC-  
-----AT-----  
CAGGGTTTACTAAAACGATACATGGTATGCCACCCCTG---  
ATTGTCTTCTTCTTGGCATACTTGGGGTTGACTGTGAAATCCTTCTGAGCA--CCGAGGAAGCATTT-----C--  
CAGTTTGGCACATATTTAATAG---GG---ATGTCATCTATTATATTGTATAATGCATCAGCATTATAGT---TCG--  
-TGAAATCTAC---TTGGCTGTTGTAGTAGTTGT---GGATCCCTAG-----  
AGATCTTGCCAGGAAGTCTTTCCTGTTCTAGTAGGTCCGCAAATGTA-GAGGGATCTATGGC-----GTCCTGGT--  
-----GATTCCTAGTATA--GTCAT-CCA-----T-----CCA-----  
CCTGAGGT-----TAGAT---AGAGC-----TTGGTCC--GAAGGAATGCTATTACA--  
-AAGGATGTAAGAATCT-AGACTTAC-----  
-----  
-AGTGAAC-----AGTTCGGTG---TTGGC-CCAGTTTTGAATGGTCTCATGA---CATATCAGAGATTCGGT--  
TGGAAC-----TCTGG---TGTATACTGGGGGATGGGATCAGGAAAT-AGATAGTTAGCAGTATACTG--  
GAAGCGTTGTAG--GTTGATAGACCATTCAA-CCGGAACCT-----AGATCTGACCAT-ACTGATGAAC--  
TCCTCC---TTGGAGGTAGCA-----GACTCGATGATCTGCTTCA---TCGCTTCGT---CCTT-----  
-----ATCAGGACGACCAGAAGTTGTGTGGTGGATGAAT-----  
-----GTTCCCC--A-----CTCAGCAGTATG-----TTCA-----TGAGAATCA-ACCT-----  
-----CCTT--GGTGATGTACTCACGA-ACATC-----  
GTTGCAGTTGTTGGCAGGTTGGATGT---TGGGATGATATGTGGTGAATGGAGATAAG-----TCCATCCG-----  
-----TA-----GGTTCAAGGCATTGGGATTGGTGATTGAAGCTCTCTTCTCACACTGCACGAGTACGTGCAGATGTG-  
GTGAATTGTC-----TTCATGTCGCTCTCTGACGGAGCAGATATACAG---T-----  
GGTTTATACTTCTGG-----AGGAGAGAGCGAAGAGAATCCAAGGCGTACTGTGGCTCAAGGATGCA---  
TTGTGGATATGTAAGGAATAAAT-----ATTTGGAGTAGACGCGAAA-----  
-----CCT-GGTGG-  
AGCTG--GAAGCAACGGTAGCCATGGCTAACACAG-----AAGTCCGCTAGGTCCCTAGCAGAAATCAG--  
-----GGGTG-----TCC-----CAG-----  
-----AAAACCTCTAT--GCT-----  
-----TACCCTCCGTGTGCCGGTGTGCAGGATTCACA--TCGTTTTGTGAATGTG-----T-GAGTA---  
---GCCTATTTA---TAGGCGGGAGTTCAGTG-----CGGGATGTTAGTT-----  
-----AGCCGAAGGCCCACTAACGGG-----  
TG-----  
TGCGGGTTCGGG-----GGAGGCCACGGAGGTC-----TAATATT  
>PanSV\_L39638  
-ACC-----GCTC--ACACCCCAT-GCGAGC--CACG---GCCCTGTGTGG-----  
CGA---G-----  
CGGTCCCCGGATGT---TCTTACCCC-GGTGCGATTTCTTT-----  
-----AGCTGCGT-----GTTCTTTAG-----  
-CAGCTGCCCCCACTGTC-----CTATAA-----GTTGCT-----CCCCGT-----  
GCGATTCGCGATCATGGATGCTAG-----CAGCACCCTCTTTTCTCCT-----TTCCCTCAG-----  
-----CCGCCTC-----GGGTACCCTCTGCAGCTCCGG---TCGCCGGAGCGCTGCCGTGGAGT-----  
CGCGTGC-----GTGAGATAGTTATC-----  
TTTACCTTTGTTTCAGTG--CTAGG-----CCTTTAC-----  
CTGCTTTGGCTTTGGGTGCTCAAAGATTGT-----ATCTTACTTCTGAAGG-----CTCAGCGAGGTAGATCCA--  
-CGGAGGAGCTG-ATC-----TTTGG-----TCCTG-----G---TG---  
AGAGG-----CCAGCCGTCGCTTCTGCC-----GACGGTTCTCG-----

CTCCGTTCCAGATCCGTCTCCGTCTGTCCGCCG-----GGACCTAGACC----TTCGTGGTCTA----  
GAGCACTCAG----CATGTCCGG-AGCTTT-----GAAGCG-----  
-----CAAGC-----G-----T-----  
TCGGATGAGGTTG-----CCTGGAGTCGAA-----GGAAGCC-  
-----CGTCAAGAAGCAAGACACCGGGTTCCCCCTCCC--CCG-----GGCTGGCCCCTCTGTTCAG--GAGA-  
GGACTC--CCTGCCCTT--CA--GATCC-----AGACGCTTACG-----  
GCGGCTGGTGACACTATG-----ATCACGGTGCCG--TC-----CGGCGG--  
-----CATCTGCAGTC-----TGATTGGCACGTATG-----  
CCCGGGGCTCTGATGAAGGT-----AACCGCCACAC-----  
CAACGAGACTC-----TGACGTACAA-----  
GGTTGCGCTGGACTAC--CACTTCGTT----GCTACTGCTGCGGCCTGCAAGTACTCC-----AG--  
CATTTGGAGTGGGTGTCATGTGGTTGGTG-----TATGAT-----  
----GCGCAGCCGACCGGCAATTC--ACCGG--AGGTGAAGGACATCTTC-----C-----  
-----CTCACTCCGATACGCTCTCAG--  
---CGTTCCC-----GTACACTTGAAG-----GTTGGCAGGG--A-GGTCTGCCATCGCTTCGTT--  
-----GTTAAACGGCGCTGGT-----GCTTCACCATGGAGACTA--  
ACGGC-----CGGATCGGTTTCAGATGT-----  
-----GCCTCCGGCCAA-----  
-----TACCGCTTGGCCGCCTTGCAA-  
-----GAAGGACATCTACTTCC--ACAAGTTCT-  
-----GCACGGGACTCGGCCTGA-----  
AGACGGAGTGAAGAACGT--T-----ACAGACGGGAAGGTCGGCGCTATTAAG-----  
-----  
-----AAGGGCGCC-TTGTAC-----AT--TGTCATT-----GCGC-----  
CTGGAAACGGG-----CT-----TGAGTT-  
-----T-ACGGTTC-----ACGGCCAGTGC-----CGTCTG-TACTTT-----  
-----AAGTCAGTTG-----GTAA-----  
-----TCAGTGATTACCA-----CA-----TCA-----  
-----A--TTAAT-----AAAACAAGTT-----  
-----TTATTCAAAGAGCGAAGCTCA-----TACAT--TACATAGTCAGCAGATAT-GCTGAC--  
-----AGAA--AACACA-----CACAT-----  
-AGTGCAGCCTCGGGCTAAAG-----ACCGAG-----TCTCAAACGACCCAACCTTAAAAACAAATCAAA-----  
-----  
-----ACAAGC-----  
ATGATATTATTAAT-ATG--CAGCCG-----CCGGC-TTAAGCAGGAG-----  
-----  
TGA-----ACCACTTCTCTCCTG--C-C-----TGCATTA-----  
-----CGTAGATTT-CG-----  
-----CAG--  
TTTGCGTAGA-----  
-----  
-----AG--  
TAGTCATACTGCGCCGGAGTCA-TGTCCTTCAGCCAGTCCCTC-----  
-----AT-----  
CCTCGTTGGCGAGGATGATAGTTGGTATGCTCTTTGAGGCCACCTTCCGTCTCTTCCCGTACTTCCGGGTTCACTATGTAG  
TCTTTTTGACAG--CCGACGAGCTGCTT-----C--CAGCACGGACAGAACTTGAAGG----GA----  
ATGTCGTCCACGACATTGTACGCAGCTTCTTCATCGTATG--AAG--ACCAGTCGAT----  
GTTATTCTGCCAGTAGTTGT--GCCGTCCGAG-----  
GCTTCTGGCCAGGATGTTTTACCTGTCCGTGTTGGGCCGACGATGTA-GAGGCTTCGCTTTCTT--GTCCTGGA--  
AT-----AATCTGGTTGT--TTCAG-ACA-----A-----CCA-----  
TTCTAAGT-----CAGCTTTG--GCTTG-----CTCTAGGCTTAAGCAGCTAGGTTCAA--  
GGAGCATGTATGCTTTA-GGACTGAC-----  
-----  
-CTGGTAG-----ATGTTAGGC--TCAAG-CCAGTCCTGGAGTGTTCGTTG--CAGAGGAGGTCAGGGTCAG--  
-TGGCAGG--ATGAGGATT--GCTGTAAGGCTCTGCAATGTCCGGGAAC-AGGCGACTAGCTGAGTACTC--  
AAAGTATGACAG--TTTTGTGGCCAGTCGTA-AGGCAGTGA-----AGTCTGCACTAG-TGAAAGGTAC--  
TCTGCT-----CTGCTAGTGGCA-----TGTGTCATGATCTCCTTCA-----TGACCTCAT-----  
CCTTAGAAGGCTTCT--TCTCAGAGTTTTCTTACCTGGAGG--AACGAAGCTTCTT-----  
-----TCC--TTGG-----TATGTAAGT-----ACTTTTCTCCCACTTGTCTTGG-  
GGAT-----CCTT--CAGTATGTACTIONCAGT-

ACCTT--GTCAGTGCTCTTGGCGCTCTGTATAT----TCGGATGAT-----A-----  
CCGATC-----TA-----  
TGTCAAAGTACCTCTCGTCACGAGTAGTGACAGGCTTGATGCACTGGAGAAGAGCATGGCAGTGCC-ATGTTCCGTC---  
-----TTGGTGAGTCTCTCTCACTACCAGGATGTATGC--T-----GGCTCAAAGTCCTTA---  
-----GTGAGCCTGAAGAGATGCTCACCGATGAACTCAGGTTCTAGTGGACA---  
CTTGCTGTATGTGAGGAAGGTGT-----TCGCGTTCGGGTGCCTGAA-----  
-----  
GGACCGGACGCTGTGCCTGCCATCTGAG----GTGATAGAC-----AGAGA-----  
GGTCGACATTAGCGC---AGGAGGTT-----GG-----GC--AATCTCAGGCTC-TCC-----  
-----TCAGCTCTAT-CCCT-----  
-----AGA---CAGCTGCGAAATAA-----TCCGCC--  
CACCCCCCGT--GCC-----TTTTATA-----GCTG--CTTGGTGGG---CTGGGCCGGC-----  
-----CGGC-  
-----ATGGGGTGTGAGCAGC-----  
ATAATATT  
>PDSMV\_JQ948087  
-ACC-----GTCGCCCTGCTTTG---CGAGGG-CCCATGCTCAAC-GGGCCC-----  
-----G-----AG-----  
CGGTCCCGGCCCATCCACTAAGGATTGCTCC-----  
-----CCGCAATACGATAAA-----TGGATTTGACTGCCGCTT-  
TACTTTAAACGACG-----TCTATA-----AAAGACCGCATCGC--AC-----  
TACGACGCCA-----TGGCGGAGTACCCTCAGT-----CTGCTTTAGTGGTAA--  
-----GTGGTGC-----GATTCCACGGCGAAGCCAGGA---C-----GAGAGCTTTGCCTC-----  
GTCTTTG-----AAGGTCAGTCT-----  
TTATCTTTATTTGCAGCA--TTTATTGCTGCTTGCCTTGTCA-----  
TTCATTTACAAGACGTGCATTGCGGAATTC-----ATTA-CGCAATACCGT-----TTATCCGGTTTAAGCAGT--  
-TTAACTTCATCTGGC-----TTTGG-----GCGGACCGT-----T---GA---  
GGATCCGCCAGCTGTC-----CCC---CGGACAGCGTCTGA-GGT-----TTCAATTCCAG-----  
TTGCTGTTAGAGG---TGGTATTCCCTCCTGT-----GATTCAGGTG----  
CTTCCGGAATTCCCGGAAATTGACGTTGGAAATGCCGTC-TTCCT-----  
CGAAGAG-----GAAGAGGGGGAG-----  
----TACCTCTGGT---ACTA-----AGCGGCGTAAGA-----  
AGCCGCG-----AACCACGAAG-----TGGACTGGATCCCG---CAGCG-  
CATCTAGAGA-----GGCGCTG---CA---AGTAC-----AGACCTTCACC-----  
TGGAGTGAAGACCAGGCG-----TTCAAC-----GC-----CGGTGG--  
-----CCGAGCGATCC-----TTCTCTCGGCCTATA-----  
CGCGCGGTTCTGGCGAGAAC-----CAGCGCAAATC-----  
CCAGGAAACCA-----TTACGTACAA-----  
GGTTGCTCTCAACCTT---GGAGTATCC---GCATCCGCTACGGTTCTCAAATATTGT-----TG---  
CAGCAGCCAGCCGATATGCTGGCTGGTG-----TATGAC-----  
----AAGACGCCTACTGGGATTACTGACCTGA----CCCCGTCAGACATCTTC-----G-----  
-----ATGTGCCCTCGGGGTTACAGA---  
---ACTGGCC-----TTCGACCTGGAAG-----GTCAAACGCG---A-AGCGTCTCACCGCTTTGTG--  
-----GTGAAACGGCGTTGGC-----CGTTAAGTTGGAATGTA--  
ACGGC-----AGTACGTTCCAGAAAGA-----  
-----CTACACGA-----  
-----ACCTGCCTGTCTGCAATACG-  
-----CAGAACCTGGTGTCTGTAACGAGGTTTCG-----  
-----CCAAGGGACTTGGAGTGC-----  
GAACGGAGTGAAGGACACAAC-----GACGGCGGAGTCGTC--GGACATCAAG-----  
-----GGCGGAGCC-CTGTAC-----CT--TGTGATA-----GCTC-----  
CTGCTAACGGG-----CT-----TGTGTT-  
-----C-ACAGCCC-----GTGGTGTAAATC-----AAGTGC-TACTTT-----  
-----AAGTCTGTGG-----GTAA-----  
-----TCAGT-----AG-----CCC-----  
-----ACTGTAATT-----GAGCCCATTG-----  
----GGCGATCTATGATCTGAAATAAAATGGCACATTTTATTTATCGCAT--TGCGATGAACGCGT----AGCGTT--  
-----ACAA--ATTACAATACATAGC--G-----



CAGCCTCGGGCTAAAGACCGAGTCT-----G-----AAGCG---ACCCTAGT-----  
ACAATACC-ACCG-----  
-----  
AAAAAC----AAT-----ATCTATCTGATA-ATGCCT-----  
CG-----CGCGTAGGTG-----T-----  
GTAACACCTACGCCGTCGT-TTCGA-----AGAAACGGAACCCTT--G-G-----  
-----TTCATGT-----AGAAGACTA-CG-----  
-----  
-----CAG--TTGTCTTCAA-----  
-----  
-----AC--  
CATGCAGCCTGTGATGGCTGCA-TTTGTTGTGGCCAGTCTTC-----  
----AT-----CCTCGTTCACGAGGATTATGCAAGGTATTCGGTTAGGA---  
AGAAGACGTTTCTTCCCGTACTTTGGATTACGGTGATTTCCCTCTGTGCC--CCAACAAGCCCCTT-----C--  
CAACAAGGAACGAACCTGAACG----GG----ATGTCATCTATGATGTTGTATCTGGCAGTGGGAATGACGT---GGA--  
-GGAAGTCCAC----GGAATGCTGCCAGTAGTTGT---GACATCCAAG-----  
ACTTCTTGCCCAAGTGGTCTTTCCGGTACGAGTTGGTCCGCAGATGTA-GAGGCTTCTTCGCCGT--  
TCAGCAGGACTTCT-----GTCCTGCTCAA--TTTAG-AAA-----T-----  
CCA----TTGGAGGT-----CAAGCTTG----GCTTG-----  
ATCCTCCGTGACTCCGTTGTGAATGG-----AATATGCATAT-GGACTTAC-----  
-----  
-----TGAATAT-----AATTCTTCT----CGGAG-  
CCATGCTCCGAGCACCTGATGT---TCTGCCTGTGAAGGCATCC-----C--GAAGGGATC-----  
AACATACGGAGGAGGGAGGCAGGGGAAC-AGCGCTTGCCTGAGTATTC--GAACTGTTGCAA--  
CCGTGTTGCCAGTCGAA-TGGAAATTC-----CTTTTTGACCAT-CCCAAGATAG--  
TCCTCACGTGATGTTGATTGAGAAA-----TTATAGA-----CGCCA----TTTTGGCGT----  
CCTTCGTGGAAGGAGCGTCAGCCTTCTTCTTCTTCTTCTTCG-----  
-----CTT---CGT---CCTTGAAAGC-----CCCCTGCTCAACGAAGCATACG-  
GGGC-----CCTT--CCTGATGTACGCAAGT-  
ACCTT--GTGAGGTACCCGCGCTTCTGCACGT-----TAGGATGAA-----A-----  
TTCTTC-----GA-----  
CATCGAAGAATTTAGCACTCTTAGTGCGAATGTATTTTCTGCACTGTACTAGACAGTGCAAATGGT-AAGAGCCATC---  
-----CTTGTGCTCTTCCCTTGCAGCATGAATACGT--C-----GGGTCACCTTCTTA---  
-----AGAAGTCTGGAGAGGCGTTCAAGCATGAACGACGGCTCCAGGTGGCA---  
CCTACTGTATGTCAGGAAGACAT-----TCCTGCTTCTTACCTCGAAG--CA-----  
AGCTTCGACCCCTGGGGCGCCAACTTCTCCCCCTGAAGGGGGGGGGCGCCAACT---TGCCCCCT--  
GGCGCCCTCTGTCTCACTGACATGTGAGGCCATCTTGAAGAAGCTATCGTGGATAG-----  
CTTACAGCCGTAGGATGTGCTTTGAGATC-----CGAGG-----TTT--  
-----TGA-----AAACTCTCT-GGAC-----  
-----A-A---CCGTCGCCCTTG-----CCCCCTT--  
CCGCTGCTGAAGGGCC-----TGTTAAA-----TAGGCCGACGGAG-----A-----  
-----TGGCTTT-AATTT-----GGCC---  
GGCCCCCGGAAA-----GTAGGGC---GACGAG-  
-----ATAATATT  
>PSMV\_JF905486  
-ACC-----GCTGCCCT-CTTTAC-CCGAGGGCCCCATGCTCAACGGGGACC-----  
-----G-----  
AGGTGGCTTTGCCCGGCCCTTATCAGCCCACTAAGGGCTGTTTC-----  
-----  
CCGCAATCTGATTTGTTTTTTGCTTTGACTGACATTTCTGCTTTGGATG-CG-----GCTTTA-----  
-----AATAGCCGCATCGC--AC-----TACTACGCCA-----  
TGGCGGAGTACCCTCAGT----CTGCTTTGATTGTTT-----CTGGTGC-----  
GATTCACGGCGAAGCCAGGA----C-----GAGAGCTTTGCCAC-----GTCTTTG-----  
-----AAGTCACTGCT-----TTATCTTTATTTGCAGCA--  
TTTATTGCTGCTGCAGTCTTGACA-----TTCATTTACAAGACTTGCATTGCGGATTTTC-----ATTA-  
CGCAATTCGT-----TTATCCGGTTAAGCAGT--GTAACCTCATCTGGC-----TTTGG-----  
-----GCGGACCGC-----T---GA---GGTTCGCCAGCTGTC-----  
CCTACAAGGACAGCGTCTGA-GGT-----TTCAATTC-----CCGTAAGGGA---  
AGCTGTTTTCTGCTCC-----TCCTTTGGTTT---CTTCCGTGGTT---GGTGTTTAGTTTC---

CATGGCAGC-TTCGT-----CGAAGAG-----  
-----GAAGCGCGGGAG-----TACTTCCGCA---ACCA-----  
-----AGCGGCGCAAGA-----AGCCGCG-----GTACACGAAG-----  
-----TGGACCTCTGCCC---CAGCT-CTAACAGAGA-----TGCGCTG---CA-----  
GGTAC-----AGACCTTCACC-----TGGGGTGAAGATCAGGCG-----TTCAAC-----  
GC-----CGGAGG-----ACGTGCGATAC-----  
--TTCTCACGGCCTTTA-----CGCGTGGTTCTGCCGAGAAC-----CAACGCAAATC-----  
-----CCAGGAGACCA-----TTACATACAA-----  
-----GGTTAGTATTAACCTT---GGTGTGTCA---GCATCTGCTACCGTCTCAAGTACTGC-----  
---TG---CAAGAGCCAGCCATTATGCTGGCTCGTA-----TACGAT-----  
-----AAGTCCCCGACTGGGATTACGGACCTGA---CCCCATCAGACATCTTC-----  
-G-----  
ATGTGCCCTCGGGTTACAGA---ACTGGCC-----TTCCACCTGGAAG-----GTCAAACGAG--  
-A-AGCGTCTCATCGCTTCGTC-----GTCAAACGGCGTTGGC-----  
---CGTTCACGTTATCATGCA--ACGGG-----AGTACGTTCCAGAAGGA---  
-----CTACACAA-----  
-----  
---ACCTGCCTGTCTGTAACACA-----GACAACCTGGTGTCTGTAACGAGGTTTCG-----  
-----CCAAGGGACTTGAGTGC-----  
-----GAACGGAGTGAAGGACACAAC-----GACAGCGGACGCGTC--GGACATCAAG-----  
-----  
-----GGTGGAGCC-CTCTAC-----CT--TGTGGTA-----GCC-----  
---CCGCTAACGGG-----CT-----  
TGTGTT-----T-ACAGCCC-----GTGGTGTAAATC-----AAAGTC-TACTTT-----  
-----AAGTCAGTGG-----GCAA-----  
-----CCAGT-----AG-----  
CCC-----ATTTGTAAT-----  
GAGCCCATGG-----GGCGAACT---TATGAAATAAAATCTTGCATTTTATTCATCGCAT--  
TGAGATGCATGCGT-----AGCA-----GCAA--AGCAAATTACATAACTGG-----  
-----TTTTGTGGTTCGCGAGGGGGAACCC-----G-----GAGCACGCACCC-----  
-----AAAACACT-AAATG-----  
-----  
-----AAACAC-----ACCCAAATAATCTATCTGAAA-ATGCCGGACGA-----  
GGACT-----CGCGAAGGAG-----T-----  
CCGAGATT---ACAAAGC-TTCGA-----AGAAGCTTTCACCCG--A-G-----  
-----TACATGT-----AATGTACGA-CT-----  
-----  
-----GCG---TTAGCATTGA-----  
-----  
-----AC-----  
CAGTCAGCCTGACTAGGCTGCA-TTTGTTGAAGCCAGTCTTC-----  
-----AT-----CCTCGTTCACGAGGATTATGCATGGAATGCCATTTGAC---  
AGCAGCCGTTTCTTGCCATACTTCGGATTTACTGTAATGTCTTCTGGCTT--CCGACAAGCCCTTT-----C--  
CAACAAGGAACAAATTTAAACG---GA---ATGTCATCTATGACATTATATCTTGCAATTTGAATTACGT---GGA--  
-GGAAGTCCAC---GGAATGTTGCCAGTAGTTAT--GACTTCCGAG-----  
ACTTCTTGCCCAAGAAGTCTTTTCTGTTCTTGTGGACCACATATGTA-GAGGGAACGTCTTTCGT--  
TCAGTAGGACTTCT-----GTCCTGCTTAG--ATCAG-ACA-----T-----  
CCA---TTGGAGGT-----CAAGCTTT-----GCTTG-----  
TTCCTCCGAAACACCGTTGTGTATGG-----AATACGCATAA-GGACTTAC-----  
-----  
-----AGTGTAT-----AATTCATCT---CGGAG-  
CCATGCTCCGATAACAGGATGT---GTATCCTGCGATGGCATCC-----C--GAAGGGATC-----  
CACATACGGTGGAGGAGTGAAGGGAAC-AGCGATTCAGCTGAGAAGTGC--AACTGCTGCAA--  
CCTTGTGCCCAGTCGAA-TGGGAAGGA-----TTTCTTACCAT-CGAGAGATAG--TCCTCC-----  
TTGTTTTGTGGAA-----CTTTTAATGATTTCCGCCA-----TTTTTGCAT-----  
CCTTCGTAGAAGGTGCGTCCGCTTCTTCT--TTCTCGGACG-----  
-----CTT--GATTT--CCTGAAATAC-----CCCATATTCCGCTTCGGATATT-  
GGGG-----ATTT--CTTGCAGTATGATAAT-  
GCCTT--CTTGGGCATTCTTGATTTTGAACAT---TTGGATGAA-----A-----  
TTCTTT-----GA-----

TGTCGAAGAATTTTGCACCTGTAGTGCGCACGTATTTTGTAGCATTGTATTATACAATGCAGATGGT-GAGATCCATC---  
-----TTTATGTGCCTCTTGTGCCACGTAGATATACGT---G-----GGACAGTATTTCTTC---  
-----AATAAAGAAGAAATATATTCCAGGAGGAATACAGCCGTGAGGTTGCA---  
CTTACTGTATGTGAGGAACAGGT-----TCCTCGCTCTCACCTTGAAG--  
CATGAAGAGGAGGGGGCGTTCGATAGACTGCCACCCCTTCT-----  
GGGCTCTCCATTTGACTGCCCACTTCACTGTTGCTTGTCTCACTGACAAGTGAGGACATCTCGTCAGAAGCTATCGTGGA  
TAG-----CTTCAACGCCCTTAGATCTTCTTTGAGATC-----CGAGG-----  
-----TTT-----TGA-----  
AAAACCTCTCT-TCCT-----AGA-----  
CCGCTGCCGACTG-----CCGAGTT-CTCCCCCGAAGCCCT-----TCTTATA-----TGGGCCG--GGGGGC--  
-----A-----TTGCTTTCCGTGT-----  
-----GGCC--GGCC--GGTA-----  
-----  
---AAGAGGC---AGCGCA-----ATAATATT  
>SacSV\_GQ273988  
-ACC-----GCAT--CC-CCTTTT-GCGAGGGCCCCA-----AAGGCC-----  
CGA-----G-----CGGTCC-  
TAGCCGC---TTTGTCTCTGTGGG--GTATTTGCA-----  
-----AG--ATGAAATCT-----  
GCTCTTTTCGACCGCCGACAGGCTAAGGTGCG-----ATATAA-----ATCAGC--  
CGTCCTCGCC-----TTGCTTTGAA--CATGGAGGGCGC-----CTACGGTGCGATCTATCCT----  
----TCCGCGCAGAGTGC-----TTTGCCGC-----GGTACCCATTGCAGCTCCGT-----  
CCTCTCCGAGCTTGCCGTGGAGT-----CGCGTCG-----  
GTGAGATAGCTATC-----TTTGTCTTTGTTGCAGTA--CTAAG-----CTTTTAT-----  
-CTGCTGTGGGTGTGGGTGCTGAGAGATCTT-----ATCTTCGTTGTGAAG-----CTCGCCGAGGGCACTCAA-  
--CGGAGGAGCTG-CGC-----TTTGG-----CCCTACCGT-----T---CA--  
AGCCCCTCCCGTCGCG-----CCAGTGTCTGTTCCCTGGTGC-----GTCCGCT-----  
GTCACTGCTAG-----C-----TGCCACCG-----GAGCCTAGACC----TTTCTGTGTCTAGGC-  
GGGCCATCAG---CTATGTCTTC-TTCCCTTG-----GCAAGAG-----  
-----GAAGA-----G-----G---  
TCGAATGGAGGCG-----ATTGGTCTAAGC-----GCTCCGC-  
-----TAAGAAGAAGCCGGCG--GGTACCCCTTACG--CCG-----TGCTGGG--CCTGGAAG--AGGC-  
CCACGT--CCAGCTCTA--CA--GATTG-----CGACCTACCAG-----  
GCCGCTGGAACCTCTATG-----GTTACTGTCCCT--AG-----CGGGGG--  
-----CGTTTGTGAAC-----TCCTTGCGACATATG-----  
CTCGAGGGTCCGACGAGGGC-----AACCGTACAC-----  
CAACGAGACTA-----TCACGTACAA-----  
GGTTGCCTTGACTAC--CACTTTGTA----GCCTCGTCTGCTGCTTGCAGGTACTCT-----TC---  
CATCGGTGTGGGGTTCGTGTGGTTGGTG-----TATGAT-----  
---GCACAGCCCTCCGGCAATGC--CCCC--AGGTAACGGATATCTTC-----C-----  
-----CGTTCCC-----GTACACTTGGAAG-----GTCGGAAGGG--A--GGTGTGCATCGTTCGTG--  
-----GTGAAGCGGAGGTGGA-----CTTTCACGATGGAGACGG--  
ACGGG-----CGTATCGGGAGCGATAT-----  
-----CCCTCGGTCGAC-----  
-----GGATTCTTGCCGCCCTGCAA-  
-----GCGGTCTATTTACTTTC--ACAAGTTTG-  
-----CCACCGGTCTCGGTGTCA-----  
AAACGGAGTGGAAGAAATCT--C-----GCTGATGGAGGAGTTGGATCCATTAAG-----  
-----  
-----AAGGGTGCC-CTGTAT-----AT--TGTAATT-----GCC-  
CCGGCAATGGT-----TT-----AGAGTT-  
-----T-ACGGCGC-----ATGGCAATGCC-----CGTTTG-TACTTT-----  
-----AAGTCTGTTG--GAAA-----  
-----TCAGTGATTTCCA-----CGA-----  
-----A--ATAA-----TAAATAAATT-----  
-----TATTTATTACAATGATTGGAATGCGTAGCATTAC--ATTACAG--TACATAGTCTGCAGATGT-GCAGAC--  
-----CCA--AACACA-----CACATAC-----CCAACTCGGCGGTGAG--  
-ATCGTAGGC--GGCTAAGGG-----GTAGGA-----C-TCGAA-----AAAAAC-ACACGAA-----  
-----

```

-----AAACAT-----
GATATTATTATAA-TTG--CAGCCG-----CCGGCTTTACGCAGGGG-----
-----TGA-----
-----ACCACTTCTCCCCGG--A-G-----CTCATGA-----
-----TGTAGACTT-CG-----CAG--TTGCCTCCA-----
-----
-----TG--TAGTCCCCTGCGCGGGAGTCA-
TGTCCCGCAGCCAGTCCCTC-----AT-----
CTTCGTTGGCGAGGATTACAGCAGGAATGGAGCGTTTAGCGACCTTCTTTTTCTTCCCGTATTTCCGGTTTACAACGTAG
TTCTTCTGACAG--CCAACGAGCTGCTT-----C--CAGCAAGGACAGTATTTAAAGG---GA---
ATGTCATCTATGACATTCAGGACTGCTTCCCTCGTCATATG--AGG--ACCAGTCCAC----
GTTATTCTGCCAGTAGTTGT--GGCGACCTAG-----
GCTTCTCGCCCAGGTGGATTTGCCGGTCCCTGTTGGACCGACGATGTA-CAGGCTTCGCGCTCTTCCGGCCTCTTG---
AG-----GTTGCTGT--GATAC-AGT-----TCGTCGAGCCA-----
GACAAGGT-----CAGAGGTT----GCCTG-----TTCTAAAG---AGCAGCCATG---AA--
GAAGAGTATAGTCCCTCA-GGAGTGAC-----
-----
-CTGATAG-----ACGTTGAAG---TTCAG-CCATTCTTCAATGCGCTCGTAG---CAGTGGAGGTCCGGTTGTG--
-TTGGTGG--ATGAGGATT---GGTGTAGGGCTCTGCTATCTCAGGGAAC-AGCTTATTAGCTGAGTACTC--
GAAGTACTGCAG--CTTCGTTGCCACTCGTA-CGGTAGCTC-----CTTCTGAAGCAT-GGAGAGGTAC--
TCGTGC-----TTGTTGGTGGAG-----TGTGAATGATATCGCGAA---CGATATCAT---CCTTTG-
AGGCGCGAGTGTAGAGCTC-TCACCGATCTGAGG---AACGAAGGGCTTCT-----
-----TCC--GTGG---AACGAAAGT---ACCCTTCTCCCACTGACACAAT-GGGT-----
-----CCTT--GAGTATGTA CTCTCTT-ACCCT---
GTCTACCGATTTAGCAGACTGGATGT---TGGGGTGGT-----A-----CTCATT-----
-----TA-----CGTCGAAGAACC GCGGGTCTGAAGTCGTCACGGGGCGGACGCTCTGTGCCAGGGCATGGCAGTGCC-
ATGTCCCATC-----TTGATGAGCTTCTCTAGCCACCAGGATGTATGC---C-----
GGAGTCCATGGAGCT-----AGCTTGCTCCATAGGCTCAGACCCAAGATCTCGGGATCAAGGCTACA---
CTTGCTGTAGGTTAGGAAGGTGT-----TTGCGTTCCTGTGCTGAA-----
-----
GGAACGAGAGCTGTTACTCTCAGTGCTA--GTGCTGTTAG-C-----GTAGGCCA-----
TCGGACGGCTGTG-GTTG---TG--CTT-----TGAGA-----TC--CGA---GGTTTC-TC---
-----AA-----AACTCTAG---CT-----
-----AGA---C--TT-CGCATCGAAA---TCCGCCA--
GCACCCGGGC---GGC-----TTTTATA-----GCTGTCTTATATGGG---CTGGGCCGAA-----
-----AGGCC---
GGCCGGCATACAAAA-----AGGGGATGC-GAA--G-
-----ATAATATT
>SCTAV_HQ443515
-CCC-----TGCAAATGCC-----
TTTACACGTGTGCG-----
--T-----AGT-----ATGACTGAC-----TCTTTTAAAAGCGT-----
--GCTCCCC-----ACGCT-----GCCTTTA-----CTTT--
TCTAAAGTAAAGT-----T--GTGGGACCTACCA-----CGTTACTTTGTTGA--
ATTCAATTATTTGAATTTGAA--ATTTCTCATG-TTATATACCGATAGGGTTTTAGTATATATACATGT-----
-----ATAAATGATGGTCTGTCTACCAGACTGGTTGTTTCTTTTGT-----TAT-----
--TTTGAGTATTC-----TTCTACAGTCTGGTA-----CCAATTTTTATGGGACCTTTCAG-----
-----AGTGGGACAGTTTCCAAACAATTATCCTGCGTTGCTAGCCGTGT-----C-----
GACGAGTTG-----TTTCTT-----CA-----GATA---CAACAAGTGGTGTAT-----
-----TCTAG-----GAATACAGC-----CGGAAAT--CGAGCCGTTGAG-----
-----
-----TCTAGAAGACGGCGAGGTCTTTCTTCAGTTCAGAAAGGAAGTGAAGAAGTTGCT-
GAGGCGTAAGTGCAGTTTCCGGTAGAAAGTGCGTTCCTTTATCAGGATAT-----
TTACAAGGAGTACGTGAAGGATGAGTCAGAAAAGAAAACG---
AAGTCGCAGACTTCATGGCCGAAGAAGAGGAAGACGACTTCTGG-----GAAGAATT-----
ATCAATG-----GAAGCGACCTGTTCAA-----AAGAACAGGGCGTTGAAGTTGAAGATG-----
-----TATGATGACA-T---GCT-----

```

TGGTGCTGGAGGTATT-----GGTTCAACCATCAGCAA-----TGATGG-----  
-----GTTGATTACTA-----TGCTCAATAATTATG-----  
TTCAGGGTATAGGTGACAGT-----CAGAGGTCTAC-----  
GAATGTGACTG-----TTACAAGGCA-----  
CATGAAGTTCGATATGGCTCTCATGGCCAGTTCCTGGGTTTTGGGAGGCTCCCAATTATAT-----  
-GACTCAATATCATTTGGATTATT-----GTTGAT-----  
CGAGATGTTGGATCTGTCTTTCCGACTA---AGTTGGATATGATTTTT---G-----  
-----ATATTCCTTCTAATGGTCAGG-----  
CTATGCC-----GTCGACCTATAGA-----ATTCGTCGTG---A-TAGTAATGAACGATTTATC-----  
-----GTGAAGAAGAAGTGGACTACGC-----ATATGAT---  
GTCTACGGGTACTG-----ATTATGGTGGCAAACA-----  
-----GACTTACAAAGC-----  
-----  
GCCGTCTCAGCCTAATTATAA-----GAAGGCTATGAATATTAATGTCA-----  
-----GGAAT---ATCAATGTGA-----  
-----AGACGATATGGAAGGACAC---C-----GGAGGTGGAAAATATGAAGATGTTAAA-----  
-----  
-----GAGAATGCTCTGTTGT-----ACGTTGT-----TGTC AACGATAA-----  
TACTGATAACACT-----AA-----TAT-  
GTATG---CC-ACATTAT-----TTGGTAATTGT-----AGGTGT-TATTTCTATT-----  
-----AATA---G-----  
-----TTTGAAATGTATCAA-----  
-----TGATATT-----  
GAAGGTTGTTATGGA-----AATATTTGTTTACAAATA-----  
-----  
TTTGTGGTTAATATT---AATAAATGGAGATATGTAAATATCTGGT-----  
--ATTCATGACTTGAACAA-----ACAAATTT-----  
--ACATTAAAAACACGCTCAGA-----AA--  
AAAAACACACTTCGCAATAACTGGG-----GGAAAAGTCAAAT-----  
TACAATAGTTTAG-----TC--CTGCCGAGC--CGAA-----  
GGCGAGGACCTACCTGCAGCCTATTT-----A---TTCTACTC--TGT-  
AGAATACC---AAAC-----TTCATCA-----  
-----  
-----CTAGAT-----  
-----AAATAGTACACTTCGCAGTTTGGCTGGAACCAATCCTTCATTGC-----  
ATCACTCATAATGGAATCCAG-----TCCATATCTGGATTTGTTATAGCAATACATGGTCTCCCTCCTGGG--  
-ATT--ATGAGGTTGGTTTGTGTTTTATCCAAACACTATAGTCTTCATTACATCCTATTATGGATTTGAACAAC--  
TCTT--GTTGTATTTTCATATATCTT-----ATATCATCTATTACATGGTACGTAGTATGTTCAATGT-  
CATAATTGGACC--AATCTAGTACCATT-CCTGACATGTAGTGAT---GTCTTCCTAA-----  
CGATCTTGCCCATTTGGGTCTTTCTGTCTTGAAGGACCGCAGATGTA-GAGACTTCGGGGTCTGAC-----  
-----  
TGGT-----CTGTTGTCTGGTTCCCTG-----  
AAGAATTTAGATCGTTA-GGATTTTC-----  
ACTACATGTTAATTCGTGCGCTAGACGTTCTATGTGGTAATGTTCTGCAACTTATTTCCCAATCCTGTAGGATTGAAC  
CTCTACAGTTATTACATAGCTCGTAATTAAGACAGTGACTACTTACGAA-----ATATATATTGTGTTCCG-  
CCCCTCTTTGATTTGGTTCAGGCAACCTAGTGAACCTC--G-----TCCATCG--GGGTAGATA----  
AGGTTGCACAACCTGGCCTGAAATGGTAG-TTGGCG--AAGGCCAAAATT--GAAG---GCCA--  
TCTGAGGACAAAAGTCCGT-TGGGCAGGA-----TTCTCTGATGTTATTGAAGAACT--CGTCCT-----  
--TGGTGTG--GATGAATCAAGAATTCGTCTCCAT-TCCAGG-----TTGCTGTCGCCAAGACGG--  
--TTT-----  
GGAGAGC--GCCCTGCCAGTCGAAGCT-----CTCCAAAGCATCGTGGTTGTTGGTCCT-----  
-----CCTT--GGTGATGTACTCCCAA-GCTCG--  
CTTGGGGGCGTTGAGTCCGTCGATTC-----TTGGATGTA-----  
TTGTTCTGCCATCTGGTAGGATGA-----  
TGTTGAAAAACAGGTTCCCATTAACCTGTAATTTTTTATTGCACTGGAATATGCAATGTGTGTGGA-  
ATCCCCCTCAGGGTTGATTCAGTTGGTTGGTGGTTC CAATGCAACTGATAAGAAGAG---T-----  
ACTTCGAATTGTTG-----  
AGTAGGGCTAGTAATTTCTCAAATATATAATCTTTAAAATCCCCACCTATTTGTGAATAGGTGAGAAAAGCAT-----

-TCTTTTTTTTGAACCGGAA-----  
-----ATAAC-----CGGGTCCATTTTGATTA-----GGA-----  
-----CGGTTTCTGGAGGGTGTTCG-----  
-----  
GGCCATTTTTTATTTCAAAAAGGAAAGAGGGAAATAAGAGTTGTATTTACTCTTTCCGTACTA-  
GGCTGAAAAAAAAACTCTATATGTTGGAGT-----AGAGTAATGTGTTGCT-----TATATATCA-----  
-----GAGTAA--A-----  
-----GGCATTTGCAGA-----  
-----  
-----TAAGATT  
>SMaV\_KF806702  
-ACC-----GC-----ATTGCCCTC-----  
-----G-----CGTCCC-----  
GAGGAGACACGTGGCCCTGTACGTGGCTCCGAG-----GGATTTTGG-----  
-----  
CGGGAAATTTCCCTTGTCTTTTCGAAGACGGTGC GCGGACCCACCAG-----CGCACTATAA-----  
-----AAAGACCTTCCCCAGAAC-----GCACTCCACATATGGAGAAGGGACCTGGCCCA-----  
CAACTTTATCCGGCG-----ACAATAACAACCACTAAC-----  
-----CCGTCCGGAGTGGGGAACGACGG-----AGCTT-----  
GGAGATCACTGGTA-----CTCATCTTTACCATTGTG--AGCATATCTCTTGCAGCGATAGCT-----  
-GGATCTTACTTTCTTTGTGTGAAGGATTGC-----CTCCTGACCTGGAGAG-----CGAGGCGATCCAGGACAG-  
--TGACCGAGCTA--GGG-----TTTGG-----GACCACGCC-----GCAGCGT--  
GGCGGAGGTAATACGG-----CGGCGACAGGT--AGCGGGGGG-----GCCGGTAACGC-----  
-----TCCCCTTCCTTTCTAATTC-----  
CGCCTTCGTCGTCGGAGGCACT-  
TCGAGTACTATGCCGTCCAGATCTAGGTACACATAACAAGAGGAAGAGGCCACGAAG-----  
AGGGCCCGTGTGAGCCATGGCCTCCGG-----AACTCACGAGGCTTGGG-----  
-----TACACGCCCTCGG-----GACACAG-----  
TTCTGCGGGGGACCCG-----CAGAAGG-----GATA-----  
ATAGGCCCAGCCTG--CA--AGTCA-----TCAACTACACA-----TGGAAAAACGATGGGAGT--  
-----TCGGTGAAGATCGGAAA-----CGGCGG-----AGCCGTATAACC-  
-----TTCTCACGGAGTTTC-----CCCGGGGAGATGCTGAGGAT-  
-----CAGCGTCACAC-----CGGGGAAACTC-----TAACCTACAA--  
-----GGTGAGCTTGAATCTGCAGTTCGGCG-----  
TGGCCGAGGAATACAGGAAATACTGTA-----ATCGGGCCCAGAAATATGGTATTTCTGGTC-----  
-----TACGAT-----GCGCAGCCGACCGGACAAAA--TCCGG-----  
CGATAACTGACATATTT-----C-----  
-----ATA--TTGCGGCCTCGCAATTCTTTCCAATTCC-----  
GGCTACATGGATG-----GTTTCTCGGG--A-GAATTCGCATCGCTTCGTC-----  
ATCAAGAGGAAGTGGA-----TGTTTCATCACCGAGACGA--ACGGG-----  
-----  
TCCGGAACT-----  
-GCGAAAGACTATAC-----TAACGCGCCATGCTATCCGGC-----GCATTTCA-----  
-----GTTTAATTTTCA--AGAGGTTTCG-----  
-----TTCAGCGTTTGGGCGTTC-----GAACCGAATGGAAAAATTC--A-----  
ACTGAAGGTGGAATTGGAGCAATCTCC-----  
-----AAGGGTGCG-TTGTAT-  
--CT--AGTTATA-----GCGC-----CAGGAAATGGC-----  
-----AT--GCCTCT-----C-GAGGCTA-----  
GAGGGAATATC-----CGTCTG-TATTTT-----AAATCCATTG-----GAAA-----  
-----  
TCAATAAAGA-----TGGA-----TGTT-----TCAAATATA--  
-----TGAACACATT-----  
-----T--TATTTGTTCA--GACACTCGTTATGTT-----A-----  
---CGAGTCGGTCCGGAC-----CAAACGAATTTGGGCGGACAG-----  
GACAAAGCAGGCGGCTAT-----AGGGCGCGCCTGGG-----  
-----  
-----GAAACACCTTAAAAA-----  
AAAACATACTTCGGAA-----TTACAAATCAGGCGCAGCCTG-----  
-----ATCA-----GGCGTAGCGA-----

-----AAAAGCTGTCCCCCT--C-G-----TAGAGGT-----  
-----AGTGCAC TT-CG-----  
-----CAG---TTTGCTTCAA-----  
-----  
-----AG---TACGACCGCTGAGCTGCGGTCA-  
TCTTCGGCAGCCAGTCGTC-----AT-----  
CTTCATTGACGATGATGATGCTTGAATCCCGCCTGCT---  
ATCTTCTTCTTCTTGCCATATTTAGGATTTACAATATAGTCTTTCTGGCAG--CCGACCAACGACTT-----C--  
CAGCAAGGACAGAATTTAAAGG---GA---ATATCATCTATTACATTATAAAAAGCCCTATCGCGATAGT---TTG--  
-TGAAGTCTAT---ATTATTATTATAATAATTAT---GAGTTCCTAA-----  
AGACCGCGCCCAAGTGGTCTTTCCGGTCTTGTGGGCCGAGATGTA-GAGGCTCTTTCTTCTTGT---  
GCCATCATTCCG-----GCTGGCATC--AGAAAGCCA-----  
-----TTCTAAAT-----CAGAA-----AGAGC-----  
TCCCCTGTTGGGTGTAA---AACGGAATAGGCAGCG-GGAGATAC-----  
-----  
-----CTGGAAT-----ACATTGTGA---TTGGC-CCAATCAGCAATTGCCTCCGGG-----  
CACCGGAGACTAACTGCCAGTTAGGAG-----T---TTCGTACTCCGGCTCAACCTCTGGA AAC-  
AGCTTGATGCGGAATATTC--GAATGCTTGGAG--TTTGGTGGCCCACTCGAA-TGGAAATGT-----  
AGTTTTAATCAT-CCCGAGGTAG--GACGCT-----CTGTGAGTAGCT-----GTTGCGAAGATGGTTGCCA---  
--TCTTCGCGT---TCTTCGATTCCC--AATCTGATGAACTCTCACCCTACTTA---  
CTGGAGTTCCCATACGAATC-----CCTCTTC--C-----  
AACGGTGTACCT-----ACCTCGGGAGTACTGAGAAATC-GGGT-----  
-----TCTT--GAGACAATAGTCTCTA-ACCGA--TTTACTCGATCTAACAGGCTGAACAT-----  
TAGGATGGTA-----T-----TGCTT-----AT-----  
AATCAAAATGATGAGGGTTGGCAGTAATAAGGTTGTACCCAGCTGCACAAAGGCATGAAGATGAA-ATGAACCATC---  
-----TGCATGCCTTTCTCTAGTACATAATACTACTT--C-----GGACTAAGAGTAAGC---  
-----AACATAGTCCAAAGATAAATCCCGACATCCATTGGATCGACGGGGCA---  
TCTGGGGTACGTGAGGAAAATCT-----CGGAGGCATCGAACCGGAA-----  
-----AGTGG-  
AGATTCTCTCTCTATGCTCTGGGGGAGGACCT-----CCCTCGTTGCTATCCTCAG-----AGAA--  
-----TGACG-----CGT-----  
-----AAGGCCAC--TTG-----  
-----ACATAATCGATGACTATTGAGGTGGTGTTTTA--CTCTCTAGAC-----TTGCG--  
---CATTGCATCTGTCCACACTGCTTTATTTA-----T-----  
-----AGGCCGGAGGCCTAGT-----  
-----  
---GGGCCGATTCGGGACGCGGGGCATGCGCAAT-----TTAATATT  
>SPLCV\_AF104036  
-ACC-----GG-TGCCCGC-----  
-----CGCGCCCTTC-----  
AAAAGTGGGCCCCACAAGGGGACCACGCGTC---TTTTCCG---TACTC-----  
-----TCTTTAATTATGACATTGCT--TTATAAGGACCAATCC---  
-----TGTTTC-----GCCCTTGGCGCCCAAGTA-----  
TGGCTGAATTGTGGGACCTTTGCAGAACCCACTACCAGAT-----  
ACTTTATACGGTTTTAGGTGTATG---CTATCCGTAAAATA-----CTTGCAA-----  
AGTATTTTGAAGAAATACGAGCC-----AGGAACCTTAGGGTT-----CGAGCTCTGTTCCGGAG-  
TTAATC-----CGTATATTCAGAGTCAGGCAGT-----ATGACAGGGCGAA-----T-----  
-----GCGCGTTTC-----GCCGAGATTTTCATCCA-----TATGGGGGGAGACCGGTA---  
AGACGGAGGCTGAAC-----TTCGAGACAGCTATCGTGCCCTA-----CACTGGG---  
AATG--CTGTC-----  
-----CAA---TTGCT-----  
-GCCCGAAGCTATGTCCCGGT-TTCAAGAGGCGTCCG-----GAT-----  
-----GAAGAGAAGG--AG-----  
GGGTGACCGCATCCCGA-----AGGGATGTGTGG-----  
GTCCCTG-----TA-----AGGTCCAGGACTATGAGTTCAAGATGG-----  
-----ACGTTCCCCACACGGGAA-C---GTT-T-----GTCTGTGTCTC-----  
GGATTTTACAAGGGTACT-----GGGCTTACCCATCGCCT-----GGGTAA-  
-----GCGTGT-----TGT--GTGAAGTCCA-----  
TGGGTATAGATGGGAAGGTC-----TGGATGGATGA-----

TAATGTGGCCA-----AGAGAGATCA-----  
CACCAATATCATCAC-----GTATTGGTTGATTCGTGACAGAAGGCCCAAT-----  
-AAGGAT---CCGCTGAACT-----  
-----TTGGCCAGATCTTC-----ACCATGTAC-----G-----  
-----ACA-----  
ATGAGCC-----CACTACTGCTAAG-----ATCCGAATGG---A-TCTGAGGGATAGAATGCAG-----  
-----GTCTTGAAGA---AG-----TTTTCT-----  
GTTACAG-----TTTCAGGAGGTCCATA-----  
-----CAGCCACAAGG-----  
-----  
-A-----GCAGGCATTAATTAGGAAGTTTT-----  
-----TTAAGGGTTGTATAATC-----  
ATGTTACTTACAATCACAA--G-----GAAGAAGCTAAGTATGAGAATCAATTA-----  
-----GAGAATGCACTTATGC-----TGTATAG-----TGCTAGCAGTCA-----  
TGCTAGTAATCC-----TGT-----  
GTATC---AG-ACCCTG-----CGTTGC-----AGGGCT-TATTTCTATG-----  
-----ATTGCGAT---AATA---A-----  
-----TTAATAAAA-TTATATTTTA---  
TTAATAGAGTAATACCTTTACATCATCAT-----TACAAT-----CTACAGT-----  
ATCTAATT-----CATCTATCCAAGAACATAC-----TCTT-----  
GGAAGATATCTAATAACAAAACCTAAATTAACCTAACTAAAAACCCT-----  
AAATTTGCTAATTCATTACATATG-----CGCCATTTAAGGCGTTCCAAAATA-----  
CCAGTCCAACCTGTG-----AATAGCACCAGTTAGACGGGTCGTCAAG--ATCCGGAATTGGAGGAA-----  
-----GATCTTGT-----GGAATCCCAGTTGCCTCCTTTC-----  
-----CCTGTAGTTCACCCTCAGCTGGAATTTGAG-----  
GATGGTTCTCCCCTG-----TGTGCTCTCGTGGACATACATTATTCTGAGATGGAACGG-T-----  
GCAGTCCGACCCACAGACATGGGGTTGGTGTGCAATTCGACTG-----CTCTCGTAGTCTGAGCATGACTTA-----  
-----TTGA---TTCCCCTG---TGCCTGAATCCATGCTGGTACTTGCAG--GTTGTTG-----  
----TTATGAAGGCTGAACAGCCG-----CAACCCTTCCACACTA-----  
-----  
TCCTCGTCCTCTGTTCAGGAACT-----  
TTCCTCTTGGCCTTCTTCGCCTCTGTGTGCAGTG-----  
GCTCCTGAATGGGACACTTCCCTCTTGTACCCAGAAAGGGGATTGGACATCGCAGAATATAGCGTTTGTGTTGCCCAATT  
CTTGAGTGCTCCTTGCT-----CTGGTTTGTCCAACCAGAGTTTAAA-  
TGAGGATCCCTCTCCTGGATTGCAGAGGAAGATAGTGGGAATTCCACCTTTA---  
ATTCGAAGTGGCTTTCGGTATTTACAGTTGGATTGCCAGTCCTTCTGGGCC--CCCATGAATTCCTT-----A--  
AAGT--G-----  
CTTTAGGTATTGGGGTTGACGTCATCAATGACGTTATACCAAGCACTGTTGCTGTATACTTTTGGGCTTAGATCTAA--  
--ATGCCACACAAAATAATTGT--GAGGGCCCAA-----  
AGACCTGGCCCATACTGTTTTGCCTATTCTGCTGGGCCTTCAATAAC-AATGGAAATGGGTCTATC-----  
-----  
CGGC-----C-----  
-----GCGCAGCG-GAATCCAT-----G-----  
-----  
-----ACATTTTCA---GCGG-CCCAGTCGCTGATAATGTCAGGAACGGCATTGAAAAGAA--G-----  
AAGACGA--AAAAGGGGA---AGAATATACAGAAGGTGGAGGAGAAAAA-ATCCTATCTAAATTACTAAC--  
TAAATTATGAAA--TTGAAATAAATATTTTTC-AGGGAGTTT-----CTCCCTGATTAT-TTGCAACGCA--  
GCTTCT-----TTAGAA-----CCTGCGTTTAG---AGCCTCTGC-GGCTGCGT---  
CGTTAGCAGTC-----TGCTGGCCTCCTCTA-----  
-----GCAGATC---TGCCGTCGACCTGGAATT-----CACCCAG--GTGATGGTATCC-  
CCGT-----CCTT--ATCGACGTAGGACTTG-  
ACATC---GGAGCTGGATTTAGCTCCCTGGATGT----TGGGGTGAAA-----GT--  
GATTCGATCTGTTTCGGTGAGACCA-----  
GATCGAAGAATCTGCTATTTGTGCAGACGAATTTGCCTTCGAACTGCACCAACACATGGAGGTGAG-GTTCCCCTC---  
-----CTCGTGCAGTTCTCTTGCTACGTGTATATATTT---T-----TTGTGCTGGGTGTT---  
-----TGTATATTTAGGAGTTGGGCTAGGCAGTCCCTCTTTTGGAGAGAGAACA---  
GCGTGGATAAGTAATAAAATAAT-----TTTTGGCCTGAATTTTAAA-----  
-----ACGTT-----TTGG---



AGGAGCCATT-----TGGAGACACGCA-----TAAGTCAAATGAA-----  
-----  
-----TTGGAGA-----CTGGAGACA-----  
ATATATAGT---ATGTCTCCAAATGGCATTCTGGTAATTTAGAAGATC-----  
CTTTTAACTTTAATTCAAATTCGACAACCTCTGGGTCCACCAAAGG-----CGGGCA-CCGTAT-----  
-----TAATATT  
>SpSCTAV\_GU734126  
-ACC-----GGATGGCCGC-----  
GATGATGCCACTTGTCACTTTTCTATTTGTT-----  
-----CTAAAAAAGTAACCGTT-----ACTTTTGAC---CAGT-  
CAAAGAAGAATTATGGACCCACAACAATTCCTTGCTGGGCAAGGAATTGAAATTT-----  
CCCGCCA-----AAAT--TCAAAATTTAAATAAA-----GTAAACCCGACTC-----  
TGA-----CATAAAGTT--ATCTTATTTTACTATATGTATCCTATTTTATACATTTACAAATAAATGT-----  
-----ATAAATGATGGTCTGCCTTCCTGATTGGCTCTTCTCCTTTTT--TAT-----  
-----TTTTGCCATCC-----TTCTTCAATCAGGAA-----CAAACCTTTTATGGACCATTCAA-----  
-----AGTGGATCAATTTCCAGGAAACTATCCAGCCTTTCTAGCCGTTT-----C-----  
---GACGAGTTG-----TTTCTT-----AA-----GATA---CAACAAGTGGTGTAT-  
-----ATTAG-----GAGTAATAC-----CAGAGAT---CGGGGAGTTGAC-----  
-----  
ACTAGAAGAAGGAGAGGTCTTTCTTCAATTCAGAAAGGAAGTGAAGAAGTTGCT-  
GAGGCTTAATTGCAGTTTCGGTAGAAAGTGCATTTTGTATCAGGATAT-----  
TTATAAAAAGTACGTGAAGGATGAGTCAGAAAAGAAAATG---  
CAGTCGCAGGCTGCTGGGAAGAAGAAGAAGACA-----GTATATGGGAAGAAAT-----  
ACCAATG-----GAAGAGGTCTGTTCGA-----AAGAACAGAAAGATCAAACCTCAAGATG-----  
-----TATGATGACA-T---GCT-----  
TGGAGCTGGTGGTGTT-----GGTTCTGCCATCACAAA-----TGATGG-----  
-----TATGATTACTA-----TGCTGAACAACATATG-----  
TTCAGGGCATTGGTGATTCT-----CAAAGATCATC-----  
CAATGTGACTG-----TTACAAGGCA-----  
TTTGAAGTATGACATGGCATTAAATGGGTAGCACAGGTTTTTGGGAGGCTCCTAATTATAT-----  
-GACTCAATATCATTGGATCATT-----GTTGAC-----  
CGTGATGTTGGTTCTGTTTTTCCAGATA---AGCTTAGTATGATTTTT---G-----  
-----ATATTCCTCCAACGGCCAAG-----  
CCATGCC-----TTCTACTTATCGC-----ATCCGGAGGG---A-CATGAATGAGCGGTTTCATT-----  
-----GTAAAAAAGAAATGGACCACTC-----ATCTCAT---  
GTCTACAGGTACTG-----ATTATGGTGGGAAGCA-----  
-----GACTTACAAGGC-----  
-----  
TCCATCTATGCCTAATTATAA-----GAAGCCTCTCAATGTCAATGTTA-----  
-----GGAAT---ATCAATGTTA-----  
-----AGACGGTATGGAAGGACAC--T-----GGAGGTGGAAGTATGAAGATGTGAAG-----  
-----  
-----GAAAATGCTATATTAT-----ATGTTGT-----TGCAACGATAA-----  
TACAGATAACACA-----AA-----TAT-  
GTATG---CC-ACTTTAT-----ATGGCAATTGT-----AGATGT-TATTTTTATT-----  
-----GATA-----GAAA-----AAAATTTTTCCAATGAGATTGTAGTT-----  
-----TAT-----TCTAGAAA-----CA-----  
TTTTTTGA---AATAAAATGT---TTATTCTTGATAT-----AATGAC-  
-----AATGGA-----GACCTGTAAGGGTCTGGTATT--CC-----TTGC-----  
ACACACTTCTCAAT-----TAACTACTCAAACCCCCCTATTTTCACTTGGGTAACG-  
AACGATTAATAAAATTTGCCGAAAAAGATTATACTTTATTAATGAAC-----  
CGCGAACCTGGGAGCGGAAACCCTTTTTACAT-----TGATTAATAATGCGAATTT-----  
AATTGGCCACTCATAGAAATCACACATATCTAGAATCATAATCCTCTCGGTCATGAACATCATATCT-----  
ATTACACTA---CATATCTGACCTTTATCAATGTCAGATAATTTACAC-----TTACGAAA-----  
-----AAAACGCCACACAAAACCTATTAAGTGACTGAT---AAGCTTCTGG-----GTTGG--  
---CTCCTGATGCTCTTCTGTCTGGAA-----CTGGAAC'TTCCACTT--GATGAAGGTACC---  
TGTTGGTA-----TCTCTGGTGTATACTTTGCACTGACCTGCATAGTTAAAGTATACTTG-----

-----  
-----AAA---TC--ATTAGT-----  
-----TTTTT--TCACTTCTATTTTCCA--ATCACAGAAATAGCACCTAAG--  
CGATGGCTTGAATATTTTCAGTCAT--CTTTGTTGT-----  
-ACAATGGTTCACTGATGGAAATGAATACGGCATTATATAATGTCCATCTTTTAAGGCTTTTCATTTT-----  
CATCTTTATCCAAAAATCTTTAAA-GCTGGATCCCTCACCAGGATTACATAAAATAATTGAGGGTATTCCACCTTTA--  
-ATCTGAACAGGCTTTCCATATTTGCAGTTGCTTTGCCAATCATGTTGGGCC--CCAATAAGCTCTTT-----C--  
CAAT--  
GCTTTAATTTTAAATAAGATGGTGTATGTCATCAATGACATTATATTCCACTTCATTACTGTACACACGTGGATTGAAA  
TCAAG---ATGCCAGACAAGTAATTAT---GCTTACCTAA-----  
CGATCTGGCCCAGCATGTTTTACCTGTTTCTACTATCACCTTCAATTAT-TAAAGATTTTGGTCTAAT-----  
-----  
GGGC-----C-----  
-----TTGATTCA-ATTGGCTG-----TC-----  
-----  
CAAA-----ATAATTA-----TCAG-CCCATTCCATTTTCATCCGGAACGTTGTTGAATGAT--G-----  
ATAATGG--AAATGGAGG---TGTCCATGTCTCTTGAGGTTTCTTGAAT-ATTCTTTCAAGGTTGGCAAG--  
GACATTGTGATG--TTGTATCACAAATGTCTT-TGGATCCCC-----AGCCTTGATTAT-CTCAAGAGCC--  
TCTTTG-----ACACCT-----CCTGAGTTAAC----TGC---GT-TGTGG-----  
TAGACGTCGTCTTTATTGGCTTTT-----  
-----GAAC--TGCCAGAGACCTTGTATT-----GTCCGGAT--TCACAATAATCA-CCTT--  
-----CTTT--GGTGATGTAATTGTGG-ACTGC---  
ATTGGCGTCCTTGGCTGCTTGACAT----TAGGATGGTA-----AT--  
TGGCACTCCTCCTGGGGTGAGTAA-----  
TGTCGAAAAATCTGCAGTCCTTGATGTTGGACTTTCCGGATAATTGTATGAGACAGTGGAGATGTG-GTGTTCATC---  
-----TGCATGTCTCTCTGAGGCGACTCTAATGTATGTTGGT-----TTGACGACTGACCAT---  
-----GGAAGTTTTGAAGCAATTGAAGTACTTCATCTTTTGGTATATCACA---  
CTGTGGATATGTGAGAAAGATAT-----TTTTTGATGATAGTCTAAA-----  
-----TGATT-----  
TATTTTGTGCGAGGCA-T-----  
TTAAAATGGGACACCA-----  
-----GGGGTTTTTCTCTTC-----  
-----AAACTTGCATAATTGCTGGT-----  
GTCCTGGTGTCCC-----ATTTATACCA--AAACCTCCTTAGGACACCAGGCTTCG-----  
-----CGGCCATCCGATT-----  
-----  
TAATATT  
>SSEV\_AF239159  
-ACC-----GCGC--TC-TCTCAT-GCGAGG--CCCA-----CCAGG--C-----  
CGA-----G-----CGGTCC-----  
TGC---TTTGGTGCCTTATG--TCTTTTGT-----  
-----AA--AGCCTGTATGTAATAAGGCGCTTTGGATCGC-----  
-----ATATAA-----GTTTCGT--C--CCCAGGC-----TCAGTGGTGC--  
TATGGACGGCTC-----TGGAGGAGCGTTGCCTGCT-----TTGCCTCAAAGTGT-----  
TCTGCCGC-----GGGTACCCTCGCCACCTCCGT-----CTGCCGGAGAGCTGCCGTGGAGT-----CGCGTCG--  
-----GTGAGATAGTGATT-----TTCACCTTTGTGCTTTG--  
GTAGC-----TTTGTAC-----CTGTTATGGTTGTGGGTGCTGAGAGATCTT-----  
ATCTTCCTTGTTAAGG-----CTCGCCGCGGGATCTCAA--CGGAGGAGGTG-AGC-----  
TTTGG-----TACGTCAGA-----T---CT--GGTTGTTTCGCAGGCT-----  
CCAACGCCGGT-----CGGT-----GTCTCTGCTAG-----C-----  
TGTCCGCCG-----GGACCTGTGCC---GTTACAGGCCTAGGT--AGCCCTCAGCCACCATGCCTCT--  
TGCCGGCA-----GCAAAAG-----  
--GAAGA-----G-----G--GCCGATGAGGTGG-----  
-----CCTGGTCTAAGC-----GTGGCAC-----TAAGAAGAAGCCAGAG---  
CGTACATCTGCCGC--TCG-----GGCTGGT---CCGTCTAG--GCGG-ATTCGT--CCACCTTG---CA----  
GATAG-----CCACGTTTGTG-----GCAGCCGGTCACTCTATG-----GTGTCTGTCCCT---  
TC-----CGGTGG-----GTTTTGTGAAC-----  
--TGCTGGGCTCCTATG-----CTCGAGGCGCTGACGAGGCC-----AACCGTCACAC---  
-----CAACGAGACTG-----TCACGTACAA-----

-----GGTTGCCTTGGACTAC---CACTTCGTT-----GCTACTGCAGCCGCCTGCAGGTATTCC-----  
-----AG---CGTTGGCACTGGCGTGGCCTGGTTGGTG-----TATGAT-----  
-----GCACAGCCTACCGGAAATAC---CCCGA---CGACGAAGGACATCTTC-----  
-G-----  
GCTATAGTGACTCCCTTGTGG-----CGTTCCC-----CTACACATGGAAG-----GTTTCAAGGG--  
-A-GGTGTGTGCATCGCTTCGTG-----GTGAAGAGGAGATGCA-----  
-----CTTTCACGATGGAGACCG--ACGGT-----CGGATTGGGTCGGATGT--  
-----TCCTCCGGCGAA-----  
-----  
--TACCTCATGGCCGCCTTGTA-------GCGGGCGATTACTTCC--ATAAGTTCT-----  
-----TCACTGGCCTGGGTGTGA-----  
-----AGACGGAGTGAAGAATCT--C-----ACAGACGGTGGTGTGGGAGCGATTAAG-----  
-----  
-----AAGGGTGCG--TTGTAC-----CT--GGTCATT-----GCC-----  
---CTGGCAATGGT-----CT-----  
AGAGTT-----T-ACCTGCC-----ATGGGCAGGCC-----CGTCTG-TACTTC-----  
-----AAATCAGTTG-----GGAA-----  
-----TCAGTGATTCCCT-----AC-----  
AGA-----A---TAAT-----  
AAAACAAGTT-----TTATAATTTTCATTGAT---ATTGGACGAAGTAC--  
AATACAGGATACAATGTCTGCAGATGT-GCAGAC-----GAC---AACAT-----  
-----TAAACTGGT-----TTTGTGTGT---CGCGAGGGGGAACC---CGGAG---C-  
ACGCT-----CCCAA-ACACCA-----  
-----  
-----ACACACACACACCCAACTGAAGATTATTGAAC-ATG--CAGCCG-----  
-----CCGGC-CTAAGCAGGCT-----  
-----TGT-----AGAACTTCTCGCCTG--C-T-----  
-----GTCATAA-----TGTATATGA-CC-----  
-----  
-----GCG---TTTGCCTCGA-----  
-----  
AG---TACTCCCCTTGTCCGGGAGTCA-TCACCGTCAGCCAGTCCTC-----  
-----AT-----  
CCTCGTTGGCTAGGATTATTGATGGAATGCTCTTGGGAAGCTACCTTCTTCTTCTTACCGTACTTCGGGTTGACGACGTAC  
TCTTTCTGGCAG--CCAACCAGCTGCTT-----C--CAGCAAGGACAGAATTTGAAGG---GT-----  
ATATCATCTATGATGTTGTAGACTGCTTCTCATCATAGG--AAG---ACCAGTCGAC-----  
ATTATTCTGCCAGTAGTTGT--GGCGCCCTAG-----  
GCTTCTGGCCCATGTTGATTTCCCTGTTCTTGTGGCCCAAGGATGTA-CAGAGACTGTTTCCTG--TGCCCTGGG---  
AT-----GTTCTGGATGC--GGATT-GCA-----T-----CCA-----  
TTCTAAGT-----CAGAGATT-----GCTTC-----CTCAAGGGTTAAGCAGGTAGGAGTAA--  
GCAGCATGTAGGCTTCT-GGACTAAC-----  
-----  
-CTGATAG-----ATGTTGGGG---TTGAG-CCAATCTTCTATGGTTTCGAAG---TTTATGAGGTCCGGTTTCAG--  
-TGGGAGG--ATGAGGATT---GGTGATACTTCTGCAGTTTCAGGGAAC-AATCTGGAGGCTGAGTACTC--  
AAAGTACTGGAG--CTTCGTTGCCACTCGTA-GGGGAGTGC-----CTTCTGAATCAT-GGAAAGGTAC--  
TCTTGC-----TTGGAGGTGGAG-----TGTTGCATGATATCTCTCA-----CGATATCAT-----  
CTTTTGTGGGTTTAGGT-----TGCCTATC-CTCAGATGAAGTGGTAGCAAAGGATTTCT-----  
-----TGC--GTGG-----GATGAAAGT-----ACCTTCTCCCATTGTTTGTATC-  
GGGT-----TTTT--GAGCAGTATTCCTTG-  
ACCCT--GTCTGCGGACTTGGCACTCTGAATGT----TAGGATGGA-----A-----  
ATCCTC-----AA-----  
TGTCAAAGAACCTAGGGTTCGTAGTTTGCACAGGCTTGACGCTCTGAGCTAAGGCATGGATATGCC-AGGATCCATC---  
-----AGCATGAGCTTCCCGGCTCACGACGATGTAAGC--T-----GGATCCAGTGACCT--  
-----ATGAGACTCCAGAGATGGAGCCCTACAGCTTCAGGTTCTAGATGGCA---  
CTTCGGATATGTGAGGAATGTGT-----TTACGTTCTGTGCTTGAA-----  
-----GGAACGGATGG-----  
CAGAGCCT-GACTCTGCT-----GATCC-----TACGGTTGTCATG-GCTG-----G---  
GCG-----AGAGG-----TC--TGATTCTGAGTC-TC-----AA---  
-----CTAACTCT---CCT-----

-----ACA---GGTTTGCGAATCGAAA---TCCGACC--TCC-----C---GTC-----  
TTATATA-----GAAGG-TTAGTTGGG----CCGGGCCGCA-----  
ATTTTTTTGT-----GGGCC---G---CAAT-----G-----  
-----AGAGAGCGC-AAACCG-----TTAATATT  
>SSMV\_1\_JQ948051  
-ACC-----CC-----GCC-----  
-----  
CCCCTCGCGAGGGCGACGTGTGCGCTCTACGTCGCCCCGAG-----CGGGCCGGCTTTTGTACTGGGCCG--  
-----  
CATCTTTTCCCGCCTGAGTGCGCAACACGGGTGTTTCGATCGGGACACC---GCGTCTTTAA-----  
---AGTCAACATCTTTAGGTC-----CTT-----  
CGACGATGGAGGCGGGCCATCTTCCATCGCAGCAGGGATTCCCATCG-----  
CCTTTGGCTTATTCCCAGCCGAGC-----CCCAGCGGAGTCGGAACGACTC-----  
---CGCGT-----GGAGGACGCTCGTC-----  
CTGGTATTACCATCACC--GCAGTTGGTCTGGCGTGTTCATTT-----  
GCGCTTTACCGTCTGTGTGTGAAGGACCTT-----GTTCTGTTGCTGAGGG-----CGAAGCGCTCAAGGACGG--  
-TGACGGAACTG-GGG-----TTCGG-----CGGCACCCC-----GGCGCGC---  
CAAGACGGCGTTTCGTA-----CCGGGAGTGGGGTTCCCGGGCTTG-----GATAGTTTCCA-----  
-----  
CCAGGACCGGTTGCTTACATACGGGGACTTCCGGCGAGCGCTCGAGCTGAGCCG--  
AGCCATGCCGTCGTCCACGCGTGCTGCTGTGAGGCCTAAGCGTAAGAG-----GGTT-----GGGAAAC-----  
AACCGTGGCCAGAG-----AACTATGGCAG-----  
-----AGGGGG-----ATTACC-----CACGAAACAGCAGGAT-----  
-----CCGGTCG-----ACGGGTCTCATCGATGAGA---CCCGTTCGCCCTTT---CGTTGCAGTAA-----  
-----TGAAGTATACA-----TGGACACCCAACGGGGCA-----GGAGTTCAGGTTGCTGC-----  
-----ACCGGG-----TGCTGTCTATC-----  
TCATGACGAACTTGC-----CCCGGGGAGCAGCGAAGAC-----CAGCGACACAC-----  
-----GGGGGAGACCT-----TGGCTTACAAGCTGGG-----  
-----AATCGACCTAGAG-----  
GTACAGGTTGTGTCAGCTCAGTTTGCCTATGCCAACAAG--AGTACCCAT--GT-CATGTGGCTGGTC-----  
-----TATGAC-----GCACAGCCGAGCGGTCTGCT--TCCGG-----  
CGACCTCTGATATCTTC-----G-----  
-----ACTACGTTGAGGGGTTCCAGT-----ATATCCC-----  
ACACGTGTGGAAG-----GTGAGGCGAG--A-TCTGTGCCACCGGTACATT-----  
GTCAAACGGAAGTGA-----TGATAAACCTCGAGACCA--ATGGA-----  
-----CGTCCTTCGGGGTGA-----  
CTTCAGTAGCAG-----  
-ACCGGTCACTGCTCCA-----AAGTA-----CCGGGCTA-----  
-----GCTTCC--ACAAGTTCG-----  
----TTAAGCGGTTAGGCGTAC-----GAACTGAGTGAAGAAGTCT--C-----  
GACACGGGTGAGATCGGAGACATCCAG-----AGGGGAGCG-TTGTAC-----  
--TT--GGTGGTT-----GCTC-----CAGGCAACAAC-----  
-----GT-----TCCGAT-----A-AACATTA-----  
GGGGGTACTTC-----CGTTTG-TATTC-----AAGAGTGTCG-----GTAA-----  
-----  
TCAGTAGG--ATTACCGTC-----TTTGTA-----TCGA-----AGATTAATA--  
-----AGAAGCGAAG-----  
-----CTTTTATTTCATATA--GCGTGCAG--T--GC-----A-----  
---CAGAGAAATTACAA-----C-----  
---ACACA-----CAATCGCAGCCGAGGCTTAAGACGAGTCTCAG-----  
-----CGATTCCTGCGATCATCTACATCAA-AAAAACACACTTTAT-----  
-----AATAATTCAGG-----  
---CTGA-----GTCGCTGGCGTAAAGCCGGGTCCGG-----  
TATGAAGCTCTCTCAG--A-T-----GTCATGT-----  
---AGTGGATCTGCA-----CG---TTCGCTTCGA-----  
-----

-----AG---TACGACACCTGCCCGGGTGTCA-TATCGGCTAGCCAGTCCTC-----  
-----GT-----  
CCTCATTACCAGTATGATAGTAGGGATACCTCCCTTT---  
ATCAGTTTCTTCTTACCATATTTAGGATTTACAGTAAAGTCCTTCTGGCAG--CCGATCAGAGCCTT-----C--  
CAGTGAGGACAGAACTTGAAGG---GG---ATGTCGTGCATCACATTGTATTGGGCCTCCTGGTCGTATG---TGG--  
-CCCAATCCAC---CTGCATATTGTAGTAGTTAT---GACGTCCTAA-----  
CACCTGGCCCAAGATTTCTTACCGGTACGAGTTGGTCCGCAGATGTA-GAGGGATTTCCGGC-----  
GCCCTGCTCCG-----TCCTAGTAAC--GTCAG-CCA-----T-----  
CCA----CTTTAAAT-----CAGAT----TCGGC-----  
GTCCTCGGCCGGATGTAG---ACAAGAGTACGCGAAG-GGACTTAC-----  
-----  
-----GATGTAGCACTGCAGTTCTCC---TGATA-CCAGTCCAAGAGGTTCTCATGA-----  
CATGTGAGATCCGTAGT--CTGGTACTGG--C-----T---CTGGTACTGGGGAGTGATGTCAGGGAAG-  
AGCTTGGATGCAGAGTATTC--GAAGTGGGCTAG--TCTAGTAGCCCACTCAA-CGGAAGGA-----  
CTTTTCGGACCAT-CCCGAGATAA--TCGTCC-----CGGGTGGTAGCG-----GTTCCGAGGATGTACCGCA---  
--TGCGCTCGT---CCTTGACGGCCG---AGTCGCTGCGCCTCCTATCTGTGTGTTTGGGAGGT-----  
-----CCTCCGC--CAGG--GGCGACAAACTT-----  
CCCCCTGGCTGACTGGCTAACA-GGCT-----CTTT-  
-GAGGATATACTCTTTG-ACCTT--AGTAGCGCTTCTAACTGTTTGGATAT---TTGGGTGAT-----  
-----T-----TCCACC-----CA-----  
AATCAGCAAAGAAGAGTTCGCGAGACCGATATTGATCAGTAAGCTGCACAAGGCAATGAACATGGA-AGCCGGAGTC---  
-----CTGATGCAGCTCACGAACAGAAAGAATATACAG---A-----GGCTTATGAGACGAA---  
-----AATTTGTCCCAGAGAGCATCTGTGATTAGGGCTGGATCGATCTCACA---  
CCGGGAGTAGGTGAGGAAGATGT-----TCTTCCCTCGGAAGTGGA-----  
-----TCCGT-  
CGACGCTCTCCTCGTCGGAGGAAGAGATGGCG-----AACGGGACGGAGGGC-----GA--  
-----GAGG-----TCC-----AGA-----  
-----CATGTTCTAG--TCC-----  
-----TTAGCCGTTTTCTGGGTGTGGAGCTCTCTAAAA--CTCCTAAGACATGCGT-----CGAAACG---  
---TTTGCCAGGC-----CGTGGGCTTAA-----ATAGATAGC-----  
-----GGCCGAAAGGCACGCTGCGAG-----  
TG-----  
---GGGGCGGGATGCGACGTTGATAGACGCGCG-----ATAATATT  
>SSMV\_2\_JQ948052  
-ACC-----CTTGCCCC-----  
-----G-----CGGGCCG-  
TCCCGAGGGCGACGTGTGCGCTCTACGTCGCCCGAG-----  
GGAAAGTGATAGAGAAAGA-----  
AAGGGAATCCTTTAATTAAGAAGACTTGGATAGCACGT-----CTCTTTAAAA-----  
-----GGGGGTGCGCT-----CTG-----AGTCGGTT-ATGTCT-----AAT-----  
CCGGCAACCCCTTG-----GGTATTACACCTCAAGTCAGCATCAGGGTGGTACGCAGTCCGGA-----  
-----TCCGTCGGAATCGGTAACGATTC-----CGCGT-----  
GGAGGGCGCTAGCT-----CTTGCTTTACCGTAACT--ACGTAACCTCTGTTTTGCTGTTT-----  
-GGAGCTTGGAGGCTTTGTCTGAAAGACTGC-----CTTCTGACTCTGCGGG-----CTAAACGCAGCAAGACTA-  
--CGACCGAATA-GGA-----TTCGG-----TCAGACGCC-----GAGAAGG---  
GAT-----CCGGTAGGC-----GGAGGAGTCAC-----  
-----  
CCAGTACCCCCCGGAGTCCCTGGGTAACCAGGATCACCGCCGTA AAAAGACGGC-  
CGTGAAGCGGTCCAGAGAGGACGCTATGCCTCCTCCCGCTAAGAAGAA---GAAG-----GGTTCG-----  
GACTCTGGAGCCGGA-----GGCTCCAGAAG--CGTA-----  
-----TACCAGCGAAGG-----TATTACG-----GACCGAGGAGCTCAAG-----  
-----CGGACGA-----GCAGTCA---GACGTCCTCCGCTT---CA---GTTCA-----  
-----TCCAGTACACC-----TGGACGAGCAACGGTTCT-----CCGATAACCGTTGGTCC-----  
-----GAATGG-----GTACGTAGCTC-----  
TCCTGACTAGCTTCC-----CAAGGGGAAGCGACGAAGAT-----AAGCGTCATAC-----  
-----AGGAGAGACTG-----TGACGTACAA-----  
-----GGTAGCTTGGATCTGTTCTGCGTCAGAGACACAAACAGATACAAGGAGATAGGAT--CT-----  
--GC--TATCCACTG--CTG--CTGGTTGGTC-----TACGAC-----  
-----GCTCAACCAACCGGTACGAT---TCCGG---GGCTGGGAACCTATCTTC-----

G-----  
ACCTCGTTGATAACTTCACGG-----AGTACCC-----GACGACATGGAAG-----GTAAACCGGG--  
-A-TATGGGGCACCGGTTTGTG-----ATTAAACGTCGCTGGA-----  
-----CCTTCACGCTCCAGTCGG--ATGGT-----  
-----CACCTGGGA-----  
-----TCGAACGACTACAGCC-----  
GGGCTCCTGCAGCG-----CCCTGCAA-----GTACATGATTGCGTTCA--ACAAGTTTCG--  
-----TGAAGCGTCTAGGTGTTT-----  
-----GGACGGAATGGAGGAACAC--A-----ACGACGGGTGACATCGGAGACGTGTCT-----  
-----AGGGGTGCG-TTGTAC-----AT--CGTAATG-----GCTA-----  
-----GAGGCAATGCC-----T-----  
--GGAGTT-----ACGAAGTTA-----GGGGCGTATA-----AGAGTG-TATTTT-----  
-----AAATCAGTCG-----GGAA-----  
-----TCAGTG--ATGTAAGAACT-----  
CCTGGCT-----TGTA-----ATGAATAA-----G-----  
--ACG-----TGTTTAATAA--AA--TGCGTCAG--  
-T--AT-----GACGCTTGATTA-----CATAAC-----  
-----  
AGCACACTCGAACCGCCGCCG-AGGCTTAAAGA-CGAGTCGGTG-----  
-----  
CGGTTCCCTGCGATACATGAC-ATTAAAAAAGATTACATTTAT-----  
-----GAAAAT-----  
TACAAAG--CTTCATTTCTAATGA-----AG-----CTTTCTCCTT--C-C-----  
-----GACATAT-----AATATATCGACA-----  
-----TA--TTCCCTTCAA-----  
-----AA-----  
TACGAACGCTGGCCGTCGTTCA-TGGCTCTCATCCAGTCGTC-----  
-----GT-----CCTCGTTAACTAGGATGATACTTGGTATTCCTCCTTTG---  
ATGAGTTTTTTCTTGCCGTACTTTGGGTTGACTGTATATTCATGCTGAGAG--CCAACCAAGGCCCTT-----C--  
CAATAAGGACAGAACTTGAACG---GA---ATATCATCGATTACATTATACTGGGCTTTCGTTATTATAGT--TGG--  
-CGAAGTCCAG---GTTTCATCTGCCAGTAGTTAT--GTTTACCTAG-----  
ACTCCTGGCCCAAGATGTCTTACCGGTACGATTTGGTCCGAGATGTA-GAGCCCAGATTTCTAGT---TCTTGGAT--  
-----GGTCTGCAGACTAGCATCCA-TCA-----A-----CCA-----  
GTTTAGGT-----CCCCGAA-----GCGTC-----AGCCTGCGGATGTAA--  
-AGAAGAGTATGCAGCA-GGAGATAC-----  
-----  
-CTGGTAG-----AGTGTATTA---TCGAG-CCAGTCTGTGATTCTCTCATTAA---CACATGAGATTTTCTGT--  
AGGGAAAGGG--C-----T---TGTGTATTCGGAATCACGTCAGGGAAG-AGCTTTGACGCGGAATATTC--  
GAACTGCTGGAG--TTTAGTAGCCAGTCAAA-TGGGAAGGC-----TTTTCTGACCAT-  
TGAGAGATAACTGGCTCG-----GTC--AGTTGAA-----GTGTTGATGATTGAGCGCA-----TGACTGAGT--  
--CCTT--TGCTTT-----GGACTCAG--TGTTCT--TTGGAG-----  
-----TCCTGCC--TTTGAGAGGAATGAAGGT-----TCCTCTCTCGGCCTTGGAGACT-  
GGAT-----TTTT--GAGACAATAGTCTCGG-  
ACGTT--TGTAGGAGATTTTGCAGTTTGGATGT----TAGGATGATAATCAAG-----  
-----GA-----  
TATTAAAAGTACTGCTATCATTGGTACTGAAATGCCTTATCAAGCTGAAATAGACAGTGAAGATGGT-AATCACCGTC---  
-----GCTGTGATGCTCACGAGTGACGAGGCAGTACTT--C-----GGACCGTACTTGCGG--  
-----AATTTAGAATAGAGATGTTTCGACAACATCTCTAGGCTCCAGAGTGCA---  
CTTCGGATATGTAAGAAATGCGC-----TACGAGCTCTGAATCTGAA-----  
-----GTTTGCTGG-  
GGATGCTTCGGTGGAGTTGCTCTGTGAAGACATGAGTGAAGTGAAGTACTTAGTCGCGGAAGCTACTC-----AGCT--  
-----CTCTC-----TTT-----TAGTC--TACCG-----  
-----GGAACGCTTT--CCT-----  
-----TTGCCCTTA--C--GCGGG-----CCGGG-----  
--CCGCGTTTATA-----TAACACTCGAA-----A-----  
-----AGGCCGAGGAACCTTTAAATGA-----

CG-----GGA-----  
CCGGCCGGCCGGCCCGGGGCGGCTCGCGGGGCAAGGAAAGCGAAGC-ATAATATT  
>SSRV\_AF072672  
-ACC-----GCGC--TT-TCTCAT-GCGA-G--CCCG-----TTAGG--G-----  
CGA-----G-----CGGTCC-----  
C----CTAGGCTTTAGGAGAGCTTGTTTTTC-----  
-----TC--AGTCGGCCC-----CGATATTAAGGGCCG--  
CGTATGAATCGCA-----CTATAA-----GTAGAGCCCTAGGT-----  
GCGATCTCTG--CATGGATAGCCT-----TGAAGGAGCGTCCCCTGCT-----  
TTGCCCCGAGTAGC-----TTTGCCTC-----GTGTCCCCGGGCAGCTCCGT-----  
CCGCTCCTGCGTTGCCGTGGAGC-----CGCGTTG-----  
GTGAAATAGCTATC-----TTTACCTTTGTTGCAGTG--CTAGC-----GCTTTAC-----  
-TTACTTTGGGTTTGGGTGCTGAGAGATCTT-----GTCTTCGTTTGAAG-----CTCGACGAGGCGGATCTA--  
--CGGAGGAGCTG-CAT-----TTTGG-----GCCA-----G--GG--  
AGCGG-----GAGTCTGTGCTTCTGCC-----GACAGTTCTCG-----  
TCCAGTCGCTG-----C-----TCCGTCGGCCCCCTCTGTAAGTGACGCTAGGCC----TTTCTCGGTCTAG-C-  
T-GCCGTGAG----CATGCCTAC-TACCGCCG-----GGAAACG-----  
-----GAAGA-----G-----G--  
ACAGATGATGCCG-----CTTGAGTAAGA-----GAGCTC--  
-----GACCGAAGGCCGGG--CGTACATCTGCCGC--CCG-----GCCTGGTACTGCCGTTG--TCGG-  
GTCCGT--CCAGCTCTG--CA--GATCC-----AGACGCTCCAG-----  
GCGGCTGGCAGCTCAATG-----ATCACCGTTCCG--TC-----GGGTGG--  
-----TGTTTGTGATA-----TCCTCGGGTCTTATT-----  
CACGAGGCTCTGACGAGTGC-----AATCGCCACAC-----  
CAACGAGACTG-----TCACCTACAA-----  
GGTAGCTCTGGACTAC--CATTTTCGTT--GCTAGTGCAGCAGCCTGCAAGTATTCC-----AG--  
TATTGGCACTGGCGTGGTGTGGTTGGTG-----TACGAC-----  
----GCACAGCCTCAGGAAATTG--TCCTA----CGGTGAAAGACATCTTC-----C-----  
-----CGCATCCTGACACTTTTGAGCG--  
---CCTTCCC-----GTATACCTGGAAG-----GTCGGCCGAG--A-GGTGTGCCATCGGTTCTGTG--  
-----GTGAAGCGGCGGTGGA-----CTTTCACGATGGAAGTCA--  
ATGGA-----CGGATTGGATCTGATAT-----  
-----GCCTCCTGCGAC-----TGCCGTGTGGCCCCCGTGCCG--  
-----GAAGAACATATACTTCC--ACAAGTTTG-----  
-----TCACCGGACTCGGCGTAA-----  
AAACGGAGTGGAAGAATAC--A-----ACCGGCGGTGAAGTCGGAGACATTAAG-----  
-----AAGGGTGCC-CTCTAT-----AT--TGTAATT-----GCC-----  
CAGGCAATGGA-----ATGGAATGCC-----CGTTTG-TACTTT-----CGATTT--  
-----T-ACGGTGC-----ATGGAATGCC-----CGTTTG-TACTTT-----  
-----AAGAGCGTTG-----GTAA-----GCC-----  
-----TCAGTGATTGCCA-----GCC-----  
-----A-ATGTAAT-----AAAAA-----  
-----CATTATTATTATGATTATCAC--GCCGAGGC--GTTACAT--TACATAGTCCGAGATAG-GCGGAC--  
-----AGGA--AGCAA-----CACATAC-----AATACTCGGCGGCCAG--  
-ATCGT-GGC--GGCTAAGGG-----ATAGCG-----C-AGGAA-----AAAAAC-ACACAAA-----  
-----AAAAAC-----  
TGACATTATTGAAA-TTGGTCCGCGC-----TCAGACCCCGATAGGGGGATG--  
-----GGCT-----GTAGCTGACACCGGGGCCGCCGA--  
-----AGAAGCGCTCGCCTT--C-T-----TCCATTA-----  
-----TGTAGACGA-CG-----CAG--TTCTGATGAA-----  
-----AG---TAGTCCAGCTGCCCTGGACTCA--  
TTACCTTCATCCAGTCTTC-----AT-----  
CCTCGTTGGCAAGAACAATTGTGGAGATGCTTTTCTTGGCTACTCTCCGTTTCTTCCATACTTGGGATTAACGACGTAG  
TTCTCTTGGCAA--CCAATCAGTTGCTT-----C--CAGCAAGGACAGAACTTGAAGG--GG-----

ATGTCGTC AATGACGTTGTAGACTGCGTCCTCGTCGTAGC---AGG---ACCAGTCGAC-----  
GTTGTTTTGCCAGTAATTAT---GTCTTCCCAG-----  
GCTACGGGCCCCAAGTAGATTTTCCAGTTCTTGTGGGCCGAGGATGTA-GAGGCTAAGCTTTCTT--GTACCTGTA---  
TT-----GTTCTGGATGT--AGAAG-ACA-----T-----CCA-----  
TTCTAGGT-----CAGAGGAT-----GCCTC-----TTCCAGGCTTAAGCAATGTGGGTTAC--  
AGAGCATGTATGCTTCA-GGACTAAC-----  
-----  
-CTGAAAC-----AGGTTGGGT---TGCAC-CCAGTTGTCAATGGTGGTTGGG---TCCCTCAGAAGTGGCGTGG--  
-TAGTAGG--ATGAGGACT---GGTGTACTCTTCCACAGTATCTGGGAAT-AGCTTAGAAGCTGAGTATTC--  
AAAGTATTGCAG--TTTCGTAGCCCAGTCGTA-TGGTAATGC-----CTTCTGAAGCAT-GGAAAGGTAC--  
TCTTCC-----TTAGAGGTGGAG-----TGCTCGATGATATCTCTAA-----CGATATCAT-----  
CCTTGGAGGGTTTGG-----AATTCTTGCTCTCAGAGGAAGAGGATACAAAGCATTGTT-----  
-----TGC--GTGG-----AATAAATGT-----ACCTTCTCCATTTAGCGATT-  
GGAT-----TTTT--CAGTATGTATTCCCTG-  
ACTTT--GTTGGCACTCTTTCGACTCTGAATGT-----TAGGGTGGA-----A-----  
ACTCTC-----AA-----  
TGTCGAAGAACCCTTGGTTTCGTCGTTTGTACAGGCCCTGACGCTCTGGACTAAGGCATGGAGGTGCC-ATTCTCCATC---  
-----TGCGTGTGCTTCCCCTGCTCACTAGAATGTACGC---C-----GGACTCCAGTGACTA---  
-----ATGAGCTGCCATAGTATCAGACCCACTGCCTCTGGGTCCAGTCTGCA---  
GCGAGAGTAAGTGAGGAAGGTGT-----TGGCATTCCTATGCTTGAA-----  
-----TGGCC-----  
-----TG-----GAGGC-----TACGGTGGAGTCCTCCTG---TGAAGGCA-----  
-----TGGAG-----TC--TGATTTGGGAGC-TCT-----  
-----CCA ACTCT--ACT-----  
-----ACAACAGGTTTTGCGAATCGAAA--T-CCGAC--CTCCCTCGGC-----TTTATA-----  
GCCGACGTAAGTGAGG---CTGGGCCCAA-----AG-TTTTTT-----  
-----GGGCC--G--CAAT-----G-----  
-----  
-----AGAAAGCGCAAACCA-----ATAATATT  
>SSV\_M82918  
-ACA-----GCGC--TT-TTTCAT-GCGAGG--CCCA-----CCAGG--C-----  
CGA-----C-----GGGTCC-----  
C-----GGTTCTGGGTGCGTTTTGTTCTT-----  
-----TA--TTGCCGGCT-----GCTTTGAAACGCCG--  
GCTTTGGATCGCA-----CTATAA-----GGGGTTGTGTGCATGTGT-----TCGA---  
-----CATGGATAGCTT-----TGGCAGAGCTCCTCCTCTT-----TGGCCGAGTCAGC---  
TTTGCCCTC-----GGTCCCCTGGTGCTGCTCCGT-----CGTCCTCTGGACTGCCGTGGAGC-----CGCGTCG-  
-----GTGAGATAGCTATC-----TTTACCTTTGTTGCAGTA--  
TTGGC-----GCTTTAC-----CTGCTCTGGAGTTGGGTGGGTAGAGATCTT-----  
CTCTTGGTTCTTAAGG-----CTCGCCGCGGAGGCACTA--CGGAGGAGCTG-ACA-----  
TTTGG-----GCCCA-----G--GG--AGGCCAC-----AGT-----  
TTACCAGCTGTAGCTGTTGCTCGGGTGAAAAATCCTCC-----GTGTCCCAGTG-----G-----  
TTCAGTG-----GAAGCTAGACC-----GTTACCAGGTTAGCT-GTGCCCTCAG-----CATGCCTCT-  
CTCTGGAA-----TGAAGCG-----  
--TAAGA-----G-----G--TCCGATGAGACGG-----  
-----GTCGCCGTAAGA-----GATCTTC-----TGGGGTGAAGCAGGGG---  
CGTACATCTGCCGC--CCG-----TGCTGGTTCTGCTGTTTCG--CAGG-ACTCGT--CCCTCTCTG--CA---  
GATCC-----AGACGCTGCAG-----GCGGCTGGTACTTCAATG-----ATCGAAGTGCCA--  
TC-----CGGTGG-----CGTTTGTGACC-----  
--TTCTTGGTTTCTTCT-----CCCCTGGCTCTGACGAGGGG-----AACAGGCACAC--  
-----CAACGAGACTG-----TCATCTACAA-----  
-----GGTGGCACTGGACTAC--CACTTCATT--GCTACCGCTGCTGCCTGCAAGTATTCA-----  
---TC--TATTGGCACTGGCGTGGTGTGGTTGGTG-----TATGAC-----  
-----GCACAGCCTTCGGGGAATCC--CCCGA--CAGTGAAGGATATTTTC-----  
-C-----  
CTCACCTGATACTTTGACAG-----CGTCCC-----GTACACCTGGAAG-----GTTGGTCGTG--  
-A-AGTGTGTGCATCGTTTCGTG-----GTGAAGCGGAGGTGGA-----  
---CTTTCACGATGGAAGTTA--ACGGG-----CGTATCGGTTCCGATAT--  
-----ACCTCCTAGTAC-----  
-----



--CAGCTGTTGGCCCCCGTGCCG-----TAAGAACATTTACTTCC--ACAAGTTTG-----  
-----TCACCGGCTTAGGTGTTA-----  
-----AAACGGAGTGGAAGAACAC--T-----ACCGGCGGTGAAGTCGGTGACATTAAG-----  
-----AAGGGTGCC-CTGTAT-----AT--TGTAATT-----GCC-----  
---CTGGCAATGGG-----TT-----  
AGATTT-----T-ACGGTGC-----ATGGTAATGCC-----CGTTTG-TATTT-----  
-----AAGTCAGTCG-----GGAA-----  
-----CCAGTAGGTCCTG-----  
-----A-GTTTAAT-----  
AAAATTCCAT-----TTTATTTTCATGATAAGTCTAGCCTTGTCTCTGACAAGGTGGGT--  
TACACAGGCAGCCGCTTG-GCTGAC-----AAAAACACTAAA-----CTGATAC-----  
-----AAA---CGGCGG-CAG---ATCGTAGGC---GGCTAAGGG-----ATAGGA-----ATATGAA-----  
-----AAAAAAAACAC-AT-----  
-----CCAAC-----TGACATTATTGAAA-TTGGTCGGCGC-----  
TCAGACTTCGCTAGAAGGATG-----GGCT-----  
GTAGCTGACACCCGCTGGCAGGCTGA-----AGAACCCTCTCCCG--G-T-----  
-----TCTAGCA-----TGTATGTCT-CA-----  
-----CAG---TTTGCATTGA-----  
-----AA-----  
TAGTCCTGCTGGGCAGGCGTCA-TGTCTCTCAACCAGTCCTC-----  
---AT-----  
CCTCATTGGCTAGCACTATAGTGGGGATGGATTTACTAGCTACTTTCTTACGCTTGCCGTACTTTGGATTTACAATATAA  
TCCTTCTGGCAG--CCAATCAGTTGCTT-----C--CAGCATGGACAGTACTTGAAGG---GT----  
ATGTCGTCGATGATGTTGTATTCTGCGTCTCGTCGTAGG---AGG---ACCAGTCGAC-----  
GTTGTTCTGCCAGTAATTAT---GTCTTCCCAG-----  
GCTCCTGGCCCAGGAGGACTTGCCTGTTCTTGTGGCCCGAGGATGTA-CAGGCTGAGCTTCCCTG--TTGGAATTA---  
GA-----GTTCTGGATGT--TTCAT-GCA-----T-----CCA-----  
TATCAGAT-----CAGAAGTT-----GCTTC-----TTCCAGGGTTAAGCAACTGGGATTAG--  
CTAGCATGTATGCAGAA-GGACTAAC-----  
-----CTGGTAG-----AGGTTGTTC---TCAAG-CCAGGTATTTATTGCCGTAGGA---TCGAGGAGTGCTGGTGTGC--  
-TTTGAGG--GAAAGGACT---GGTGTATATTTCCCTGGATGTCAGGAAAC-AGTTTATTTGCCGAATACTC--  
AAAGTATTGTAG--TTTGGTGGCCCACTCGTA-AGGTAGAGC-----TTTCTGTATCAT-GGAGAGGTAC--  
TCTTGC-----TTGTTGGTGGAA-----TGTTCTATGATATCTCTTA-----CGATATCAT-----  
CCTTGGATTGCTTCT-----TGGAATTTGGCTCAGTCGAATCTCCTAGGAAGGAGGTCT-----  
-----TCC--TAGG-----TATGAACGT-----ACCTCTCTCCAGTATGTAACC-  
GGGT-----TCTT--CATGGCGTATGCTCTG-  
ACCTT--GTTGGCACTCTTTCAGCTCTGAATGT-----TGGGATGGA-----A-----  
GCCATC-----AA-----  
TGTCGAAGAAGCCGGAGTCAAGTTGTGTAGACAGGTTTTGCACTCTGAGCGAGTACGTGGATGTGAT-ACCCTCCGTC---  
-----TTCATGTGTCTCCCTGACAGATAGGACATACAC---T-----GGTGTCCAGTGTGCA---  
-----ATGAGGCTCCATATGTGTAGACCTACAGCTTTCAGGTTCTAATGGACA---  
GCGAGAGTAGGTGAGGAACGTGT-----TCACGTTGCGGTGTTTGA-----  
-----GCGACGGCTAG-----  
GAGTGGAA-GACACAGTT-----GATCC-----TACGGTCGACATCTCTTT-----  
GGGCAGT-----G-----TC--TGATTTGGAGCC-TC-----  
-AA-----CCAAC-CT--CCT-----  
-----ACA---GGTTTGGCATTAGAA--TCACGCA--CTCCCCCTGC---CC-----  
TCTTATA-----GGAGTGCTAAATGGG---CTGGGCCGAA-----  
TTTTTTTCTT-----GGGCC--G--CAAT-----G-----  
-----AAAAAGCGC-AAACCA-----ATAATATT  
>SWSV\_KJ187748  
-ACC-----GC-----TTTCCCCCG-----  
-----C-----  
AAGGCCCGCAGCCGGCCCATGTGCGCTCTATGG-----GCCGG-----

CGAGCTTTAGACCAAAGATCGTGAGTGTGCGACGTC-----  
GTGACGTGATTCATTTGACTTTAGCCTTCCTTGGCCTGGAAGAAATA-----TTCTTTATAT-----  
-----AAAGCAGCGTCGTGTCTT-----TC-----TGGTTAATGGCGCATCATATGAAGCTT--  
TTGCAGGTATCACCAACT-----GTTGTGTATACCCCATCTCCTCGTCCA-----  
-----CCGTCGACAGACGGTGATTTCGT-----  
GGTCCCATCTGATC-----TTCGCTCTCGTAGTGACT--ATTTGTGTAGTCTCACGATTTAC-----  
-GTGGTTTATCGTTGGTTTGGCAGGGATTTA-----ATAATCCTATTCCGTG-----CCAGAAGACAGAGATCCA-  
--CGGAGGAGATC-GGA-----TTTGG-----TAATACGCC-----GGTAAAT--  
CCA-----CGTGCTGGA-----CCGGGTGTTCA-----  
-----  
GGTCGTGGGCGGAGCAATCCCAGGATAAGGGATTAACGTGGTCTGGAACCTACT-  
CAGATTTTCGACGCGCTTTGGATATGGCTGGACCGATGCGTAGAAAACCTGCTAGGTCTTCACGCAGGATTG-----  
TACCGTGGCCTGCTG-----AGGCGCTGCGTCGGGGT-----  
-----TACACCCCGAGG-----AATTCAG-----TACTTCGGGGTACTCGTT-----  
-----CCGGCCG-----GTCTGATC-----GCAGACCATCTCTA-----CA-----GGTGA-----  
-----TAAACTACAGG-----TGGTCG-----GGTCAGTCA-----GCACCAATATTTAAAAC-----  
-----CGGAGG-----GGCGACATATT-----  
TATTGTGCGACCTTTG-----CCAGAGGCAATGGAGAAGAC-----CAAAGACGGGG-----  
-----AGCGGAAACGA-----TCATATACAAGATAG-CGTTCAA-----  
-----GCTCGTGTGCTGT-----GACCTCGTCGCAGTTAAAATACGTATC-----  
-----ACGTGGGATGTGCGTCCTTTGGTTGGTC-----TACGAC-----  
-----GCACAGCCTACTGGGATTAA--ACCGG--AACCGAAGGACATCTTC-----  
G-----  
ACTACAATACGGGGTTATCGC-----AATCCCC-----TATGACTTGGTCT-----GTACAGAGAG--  
-C-GCTGTGCAACAGATTCGTC-----GTCAAAGACGATGGA-----  
---AGTTCGAGCTATCGGTGA--ATGGT-----GTATCTGCGGCTGATGA--  
-----CTTTA-----  
-----GTGATGCACGGCTTAG-----  
--CGGGAAGACAATCCCTATTC-----CCGAGGGGTTTTG--ACAAGTTCT-----  
-----GTAAGCGTCTTGCAACGC-----  
-----GTACAGAATGGAAAACAC--C-----GAAGGGGGCGACATAGGCGACATACAG-----  
-----  
-----AAGGGGGCA-TTATAT-----GT--AATAGCG-----GCAC-----  
---CTGGTAACGCG-----AT-----  
GGAATT-----T-CAAGCCA-----TCGGAAACATT-----AGGGTA-TACTTT-----  
-----AAATCCGTAG-----GATT-----  
-----GCAGTAGTTGTTAGGAAATG-----  
ATTGTAA-----TTTTCACGGCAGTGAAATATT-----  
AAAATAGTTG-----TAC-----  
TATTTTATTCATTATGCCGGCAACGCTT-----A-----CTTACAAATTACAC-----  
-----ACGTATACAATATAGGGGTAGGACAAAGCAGGCGCTATGGGCGCGATAGAG-----  
-----GCAACACACTAAAA-----  
-----  
-----AAAAACTTGAAGTAGGACG-----ACCCTGTCC-----  
-----CGTCAGGGACATC-----CTCC-----  
TGTGCCTCA--GGCACAGGAGTAT-----CACCTCCGAAGAATTTTTACCAG--G-C-----  
-----TTCATCA-----CGTAGACAT-CA-----  
-----CAG--TTGTTACAA-----  
-----AG-----  
TAGTCCATCTGGGATGGACTAA-GAACCGGGAGCCAGTCATC-----  
---GT-----CAGGGTCTGAAGTATTATGCATGGGATTCCTCCCGGG---  
ATCTCTTTGCGTTTCGCTACTTAGGGTTGACGATGAAGTCCCTCTGACAG--CCGACGAGTTGTT-----C--  
CAATTTGGACAGAATTTGAAGG---GT---ACATCGTCGAGAATGTTGTATTTGGCGTGGGTATCATACG---CTG--  
-TGAAGTCCAC---CATGTGTTGCCAGTAATTGT---GTCGTCCGAG-----  
GCTCCTAGCCCACGTAGATTTACCAGTTCCTGTAGGTCCAACGATGTA-CAGGCTCCGTCCGGC-----  
GTTGTGCGGCG-----TCAAATGCGTCGGTGAT--ATCCTACAA-----T-----  
GAATATAGTGATAAGT-----  
ATATTGAGTAACGAAAATGAATAGAA--CCGGAATTA-----GGACTTAC-----

-----CATATCA-----AGTTCGTCA----TAGAC-  
CCACCTGTCAATGATTTCCTG----CAAATAAGTCGGGTTCCGAAGGAGGAAA--TGGAT---T-----  
AACGTATTACCGGACCGGTTCTGGGAAT-AACTGGATGCACTGTATTC--AAACTGCTGCAA--  
ACGTGTGGCCCAATCAAA-TGGGAATGT-----ATTCTCACACG-AGTAAGGTAG--TCGTCC-----  
TTACTCGTTGAG-----GTATTAATGATGTCCCTCA----TCAGGGAGT----CCTTGGTACCGG---  
AATCCCAGAGCGTGGTATTGCGGAAGTATTGGATCT-----  
-----TGACCCA--CGTGGTTGAAATGACCCC-----TCCT----CGAAAGACGTGATA-GGGT-----  
-----CCTT--GAGAATGTATGCACGG-ACGTT---  
GTCAGGGCTTTTAGCTGGTTGTATAT----TAGGATGGT-----G-----ACCACA-----  
-----AA-----TATCGAAGTAATGAGGATTTTCGAGTGTACATGGTCTTATCAGTCTGTAGAAGGATATGCAGATGGC-  
TAGAACCATC-----TGCATGATGCTCCTGAGAGCATAAGATGTAGAG--A-----  
GGCTGAAACCTATGG-----CAAAGAGTAAGGAGAGTTCGTGCTGCGACATCTACAGATATGTCGCA---  
CCTTGGATATGTAAGAAAAATAT-----TCTGGGCCTTGAATTGAAA-----  
-----  
GACTCTTGGCTGGGAAGTTGATCCTGCTCTAGGATCAGGCCA-----  
AGTAGTGGTGAACCTCCTCTACGCCAGGACTTAGTCGCTGAGCGGCTA-----  
TTCCCTGGTTGCTACTATCCGTAATCATTG-----CAAACCTCTCT--CGC-----  
-----  
TACTTGAAATCAGAATCCT--CCACC-----CTACG-----TGGCGTTTTTA-----  
TAGCCCCATA-----G-----  
-----GGGCTATTGGGCTACT-----  
-----GGG-----  
-----CCTTGGCGGGGAAAGCGTATTAATAT  
>TbYDV\_M81103  
-ACC-----CG-----TGAGTGCTCTC-----  
-----T-----TGGCCC-----  
---CACGCGAGCCCTTTAG---GGCGAG-----CG-----AAAGTGCGC---CG-----  
-----TAGTTTCCTTTAG-----TGGTTCAT--  
GAGTCATTA-TA---GTG-CTATAT-----AAAGATGATGTG-ACATC-----CCA-----  
-AAGTTGAAAATGTATCCCGCCAAATAC-----CAAGTGGTCCCATCT-----  
GGTATAAATTAATCAGATACCCC-----TGTTGGTACTTTTTGAG-CAATATCAG-----  
CCGCAGAAAGCGGGTGAGTCATC-----GGAGCACTTCTTTT-----  
CGAAAGTTGTTGT-----T-GCTTTGATTGTTATC--CTTTTTGCTGTAGGTATCGTATAC-----  
-TTAGCGTATACGTTATTCTTGAAGGATTTG-----ATCCTTCTTTTGAAG-----CAAAGAAGCAGAAGACGA-  
--CAACTGAGATA-GGG-----TTTGG-----TAATACCCC-----TCTCAGA---  
AGA-----CCTGGT-----G--AAG-----  
-----AAACCCTAATGGCGGGCCG-----  
-----GTATAAGGGTTT-----GGTTTATTCCC-----GGAAAAGG---GGAC-  
-----GTTATG-----G--CAAGACCTATCA-----GGCTCTTGGCG--  
TGAA-----ATCACAAGAGA-----ATTGGAG-----  
CAGCTAGTTAACCAAC-----CAGGCCG-----TCCTGTTTCTAACA-----  
GGCGTCTGCTCTA---CA---GGTCG-----CAGAGTATCTG-----TGGACGACGAATAAAACA--  
-----GGAATGACGTTTTCTCC-----TGGTGG-----GTCTACTTTCC-  
-----TCATCACTAATTTCC-----CTCAAGGGGCGAACGAGAAC-----  
-----TGTAGGCACAC-----CAACCGGACAA-----  
TTACCTACAAGATGG-CTGTGAAGACGTG-----GGTTGCTTTGGAT-----  
GGCTCGATGTTCTCT--AGGGTTTCA-----AA--ATTCCCAAT--CTATTTCTGGTTGGTG-----  
-----TATGAT-----AAAAACCCTGGCGAGAGTAA--TCCAT-----  
CGCCTTCCGCTATTTTT--G-----  
-----ATA-----GTCTATATCAAG-----ATCAGCC-----  
TGGGACTTGGACT-----GTGACTCGTA--A-TGTATGTCACAGGTTTGT-----  
GTTAAAAAACCTGGT-----CATGTATGTTGGAGTCTA--ATGGA-----  
-----GTTGA-----  
CCCTAATGCTAA-----  
-ACAAGGTCTTCTTAC-----TA---TGGT-----CCTGGG-----CCTTGTTA-----  
----TCAGTGGAGGCATGTTA--CTAAGTTTT-----GCACAGAGTGAAGAATTC--T-----  
TCCACTGGTGATGTTGCTGATATTAAG-----GAAGGAGCA-CTATAC-----

--CT--TGTATGT-----GCTC-----CTGGTGGTGGT-----  
-----GC-----TACTGT-----A-AGAGTTG-----  
GCGGTAGATTC-----CGCATG-TAT TTC-----AAATCAGTTG-----GCAA-----  
-----  
TCAATAAA-A-----ATGTCG-----T-----TATT--  
-----TTG-----ATT-----  
-----T-CATATTAA--TG--AGCTTCAG--T--GT-----A-----  
-----GAGA-AATTCAAAT-----CTTATTAAT-----  
AAAAACCCG--GAATACA-----AAAACACACGAAAA-----CGAAAAAA--  
-----  
-----AGACACCTTACAATCATTAC-----ACACTATA--  
TACCC-----T-CCT-ATGAGGAGAGGCACG-----  
-----TTCA-----GTGACTCG--ACGATTCAGGAGCAA-----  
AAAATGTTTCCGCCG--C-A-----TACATA-----  
-AATGCGTAA-TA-----  
-----CAA---TTGGCTTCAA-----  
-----  
-----AG---TATTCAATCTGAGCGGGAGACA-TATTCTTCAGCCAGTCTTC-----  
-----AT-----  
CGTCGTTACATAGTATAATACATGGCACTCCTCCCTTT---  
ATTTTCTTCTTTTCCATACTTAGGGTTGACAGTAAAATCAGACTGGCAA--CCTATTAATTGCTT-----C--  
CAGAGTGGGACGAATTTGAAGG---GG---ATGTCGTCGATGACGTTGTAGGTCGCGTGGTCATCATAGA--CAG--  
-TGAAGTCGAT---GGTCCCATTCCAGTAATTGT--GCCTTCCGAG-----  
GCTTCTGGCCCATGTTGTCTTTCCGGTACGACTTGGTCCGAGATGTA-GAGGGAGGGGATCCTG-----  
GTTCCAGCCCT-----TCTAGGTTCTGGATAT--GTCGT-CCA-----T-----  
CCA---AACTAAGT-----CAGAGTGT---GC--T-----TCAACAAGTGTGACGTT---  
ATGAAC--TAGACGGTAAGCATCT-ACACTTAC-----  
-----  
-----GTGGTAT-----AGATGCTGG---TCTCT-CCATAACTGCAGATCTTCATGA-----  
CATTGGAGATCTTCCTCAGTGAATGTGGC--CTGGTAGAT---TTCAGGTTGTGG-----TGGAAAT-  
AGTTTATTTGCAGAGTATTC--CAACCACTGTAA--TTTTGTTGCCCATTCATG-AGGAAATTC-----  
ATCCTTTATCAT-GTCCAGATAT--TCCTCT-----TTAGAAGTCGCA-----GTCTGGATAATAGTTCGCC---  
--ATCGCTCAT---CAGA---TTTG---GAAGGGGAGACTCTG--TGTTTC---TTGAAC-----  
-----TCTCCTT--T-----GGTGATGACGTT-----TCCG-----  
-----T-----CTTT--  
GGAGATGTATTCAAGA-ACTTG---TTCAGAGTTTTTAGCTGGTTGGATAT-----TTGGATGGT-----  
---T-----TCCTTC-----AA-----  
GATCAAAAAAAGAAGGGTACGTATATTGCTTCTTTTGTCAAGCTGTATAAGGCAGTGAAGATGGG-GAGTACCATC---  
-----CTGGTGGAGTTCAGTAGCAATAGCGATAAAGAA--A-----ATAGCAAAACGTGAA---  
-----AGTTTATCCAGAGGAAATCTCTGAGATTTTCTGCACTAGAGCTGCA---  
GCGTGGATAAGTAAGGAAGACAT-----ATTTGGTTTGGAGTCTGAA-----  
-----G--  
GATTTGGTTTTCTGGGGGCTGAAGGCA-----TATTAAGG---CTC-----A-AG-  
-----TACCG-----TAC-----GAT-----  
-----GAAACTCTAT--TCT-----  
-----TAAC--TAG---TGAGTGA-GC-----CAGTG-----  
AGCCAGGTTTA-----TGTGGCATTTA-----TATTGGTAGG--T-----  
-----GGACCGTTAGGATCTTGACCG-----TG-----  
-----  
GGG-----CACACTCACGG-A-TT-----TTAATATT  
>TCTVA\_GU456689  
-ACC-----  
GGATGGCCCAAAAAAATTTTTGGCGCGTGTGATGGTGACAGGTGCGTAGTGGA-----  
-----GAAGCCGCGCCAAAGTGAAGCAAAGACGATTAGTCTTGTCGTTG-----  
TGGTCCCAAAGGTAA-----  
--AGTATTAATA-----GATTGGTTAT-----TGAGTGCGATTACACGTGTATCTGTAC-----  
-----TATTTGTCTCCGAAGCT-----  
AAGCTTCGGCTATATAATTAGCATCGGTATTAGGAAATGTGTATATTAATAAATGATTTGGAGAATCGCAAAGACGATA  
AACGGGTTAGGGCGTTAGGTATAAAAAAAGAAGGTTTTACT-----CTTTATCGGAGTATTTATTGGCC-----

-----CCTTTGGCTA-----  
CACATGTACGACTCGCTCGTATTTTACCAGAGAAGTGTGGTCCGTAGTTCAGCTTAT-----  
ACCGACGAGGCGTAT-----AGTTTTCTGTTTATGTTAAAAGAAGAAACG-----CGAACGCCGTTTCAA--  
-----TATTGAAA-----GATG--AGTGGAACGTGGAGT-----  
TTAAAGAGGCCGAGGTGGCACTC-----TCCAGGC--TACGACTTAGCA-----  
-----  
-----CCGA-----  
AGACACCGGTGAAGAGACCGGCGGTGAGGAGAGCCCTGTTCAACAATCAAGCCCAGTTCAGTCGAG--TAG-----  
-----CTGCGAGACGTAG-----  
ATGGTCGAAGTTTCCTG-----TTCGAGGTAATA-----  
AACCCTA-----TA-----GGTATCGTAAGTTAAAAGCTAGTGATT-----  
-----ATCAGATCTACAAGGATA-A--GAT-----  
TGGTGGAGATAAT-----GGGTGGACGGTGACATT-----TAGTGG-----  
---GGACTGCACTA-----TGTTGAATAATTACG-----  
TTAGAGGAATTGGTAGGGAC-----CAGCGTGACTC-----  
GGTGATGACTA-----AGACCGCACA-----  
TATGCATTTTAATGGGGTATTGATGGCCAATGATGCTTTCTGGGAAGCGCCTAATTATAT-----  
-GACTATGTATAGTTGGATTATT-----CTTGAT-----  
AATGATCCTGGTGGTACATTT--CCAA--AGCCCTCTGACATTTTT--G-----  
-----ATATGGAGTATAAAG-----  
AGTTTCC-----GTCCATGTATGAG-----GTCGCCGAGA--G-TGTTAAATCTCGGTTTATT-----  
-----GTTAAGAGAA--AGACGGAGC-----  
ATTATTTACGGTCTACCGGTGTTG-----CTTTTGGGGAGAAACA-----  
-----AAATTATAAGGC-----  
-----  
GCCTAATGTTGGTCCGGTTAA-----GAAACCTATACGTATGAAGTTTC-----  
-----GTAAT--ATATGGCAGC-----  
-----CTTCCGAGTGAAGGATAC--G-----GCGGGAGGAAAATACGAGGATTTGAAG-----  
-----  
-----AAAGGGGCTTTGTTAT-----ACGTATG-----TATTTGTGATAA-----  
CAAGGCTACTCA-----  
ATTTTCGTTT-AATTTGA-----AGGGTCAGTGG-----ACCATG-TATTT-ATA-----  
-----AATA--GAGATTTAATGTA-----  
-----TTAATAAAACTCTTCTTTCA--TT-----  
GCAACACGGTACTCTTGATTTA--TTACAGA-----  
CTCGACAAACTTGAAATCCTCA-----AAT-----  
AAAACATGACTAATACCATTTATTACAAGGTTAAGGGATATAATCCCT-----  
AGATTATTTAGGTAGAAGAGTAAT-----  
CTCTTCAAAAAAATCGTCGTAAATCGATGTCCAGTCAAACCTCCGGT-----  
GACGACCAAT-ACCGTGAATTCGATCCA-----AGCCATGT-----  
-----GTAATCCCAGTTGTTCCGTAG-----  
GTTGTAGTTGAATCGGAGTTGTAATCTGATGTTGAAGAACCCGTTCTCCTGGTGGTCCCATGA-----  
---TATTAGTTTGAGATGAAACGGGT-----TTGGTACTTGATGTATGTA-----TGTTTC--  
---CAATCGTTGATTGACGATGAGTTA-----TGGG--TTCCCCTG--TGCGTAAATCCC--  
TCACCACA-----CTCATGA-----TGTATTGTGAATTTGCACTTA-----  
-----  
-----CAC--GGTAGGAGTA-----  
-----  
CTGTCTTCGACTTCTTGATCACTCGTGATATTGA-----  
AGAGAGGTTCCCTCGATTGTTGTGAAGACTGAATTTTGTAAACTCCAGGACTTAAGGGCTTCATTCT-----  
CTGGTTTGTGCGAGGAAGTTTGTGATA-TGAGGCTCCGTCTCCTGGGTTGCATAAAATGATCGAAGGGATTCCCCCTTTT--  
-ATAATACGTGGCTTCCCGTATTTGAGGTTTGTCTGCCACTCCTTTTGCGCA--CCAATTAATGCTT-----C--  
CAGT--  
GCTTCATCTTTAGATAATGGGGGTCCACGTCATCAATCACGTTGTAAGAAACGTCGTCGTTGTATACTTTAGTGGAGAAG  
TCGAG---ATGACCGGTTATGTAATTAT---GAGATCCAAG-----  
GGATCTTGCCACAGGGTTTTACCTGTTCTTGAAGGACCTTCTATTAT-  
TATTGATTTAGGTCTGTCGATAGATGGAATTA-----  
-----C-----CTTATATTTACTCGGC-----C-----  
-----CCGCAGGG-GAATTTGA-----  
-----

-----CTCCTCCAGAAAA-----AAATTAGAC----TCTA-  
ACCAATCCAAAATATCATCTGTTA-----AGACGAATTG-----GGTATGGTTGTATTTGGG-----  
GACGTATCCTACAGGAGGAGGATTGAAT-ATGGCCGCTAAGTTTGGTTT--CAGGTTATGGAA--  
TTGAAAGATGTAATCTTT-AGGGAGTTT-----CTCCCTAATGAC-AGCCAAAGCG--GCTTCA-----  
----GCGGTA-----CCTGAGTTTAA----CGCCTCTGC-ACATGCAT----CATTAGCCGTC-----  
TGTTGACCTCCTCGT-----  
----GCAGATC--GTGCATCGATCTGAAATT-----CACCCCAG--TCGATGTAATCT-CCGT-----  
-----CCTT--CTCGATATAGGACTTG-ACATC---  
GGAGCTCGATTTAGCTCCCTGAATAT-----TTGGGTGGCA-----GA--  
TGCGACCGGAACCTCCATCTCGTA-----  
AATCGAAATGACGGGGTTATAGAGCTGGATTTTTCTCGAACTGGATAAGCACATGGAGATGAG-GTTCCCCATT---  
-----ATCGTGCCTTTCTCTACAAATTCGTATGAATTT--C-----TTGGTTGAAGGACAC---  
-----TGTATAGCTTGTAGTTGCAGAAGAGCGTCTTCTTTAGTTAGATGGCA---  
GTGAGGGTATGTTAGGAAAATAT-----TTTTCATGATGAATGCGATA-----  
-----TTGCC-----  
TCGGAGTCCTTGGCATT-----TTCGGTATTTGTA-----G-  
AAATGAATTGGGGTTACG-----  
-----CTCAAACCTCTATTGT-----  
-----ATCGGGTTAC-----  
TGGGGTTGT-----ATATATAGTG--TGGATTGTAGAAGGCCCTCTTGCTCACATTT-----  
-----GGGCCATCCGTT-----  
-----TAATATT  
>TGMV\_K02029  
-ACC-----GGATGGCCGC-----  
-----GC--GATCGT-----  
-----C--ACCCGAC---CCGCTTCCGCAAATT-----  
-----ACGCCGC-----ATTG--TCGT-----  
-----CTAAGT-----GGTCCCGCATA-----  
TGTGAAG--GGCCAATC----A-TATTTGGCCCTGA-----AATCTAAGA-----  
TATTTTTTAAA-GACTT-GTGGTTAAGTT-----G-T-----  
-TAAAGTT--ATA-----TAAA---A--CGACATGCGTT-----T-----  
CGTGGATCTTTAATTCAAAATGCCTAAGCGGGA-----T-----GCCCCATGG-----  
CGTTTAAATGGCGGGGA-----CCTCAA---GGTT--TCCCGCTCTGCTAAT-----TAT-  
-----TC-----TCCTCGA-----GGAAGTTTG-----  
-----CCTA--AGCGTG-----ATGCTTGGGTAAACAGGCCCAT-GTACAGGAAGCCCAG--  
-----GAT-----ATATCGATCACTAAG--  
-----AGGCCCGATGTTCCCTA-----  
AAGGATGTGAAG-----GGCCTTG-----TA-----  
AAGTCCAGTCATACGAGCAGCGTCATG-----ATATTTCCCTAGTTGGGA-A---GGT-C-----  
-ATGTGTATATC----TGATGTGACACGTGGTAAC-----GGTATTACCCACCGTGT-----  
-----TGGTAA-----GCGTTTC-----TGC--GTTAAGTCTG-----  
-----TATATATCTTGGGCAAGATA-----TGGATGGATGA-----  
-----GAACATCAAGT-----TGAAGAATCA-----  
CACGAACAGTGTTCAT-----GTTCTGGTTGGTTAGGGATCGGAGACCTTAT-----  
-GGCACT--CCTATGGATT-----  
-----TCGGACAAGTGTTT-----AACATGTTT-----G-----  
-----ATA-----  
ATGAGCC-----AAGTACTGCAACG-----GTAAAGAACG--A-CCTACGGGATCGTTTCCAA-----  
-----GTGATCCACA--GG-----TTTCAC-----  
GCCAAGG-----TTACTGGTGGTCAATA-----  
-----TGCCAGCAACG-----  
-A-----GCAGGCTCTGGTTAGGAGATTCT-----  
-----GGAAG--GTCAATAACA-----  
ATGTCGTCTACAACCACCA--G-----GAGGCAGGGAAATATGAGAATCATACT-----  
-----GAGAACGCCCTGTTAT-----TGTATAT-----GGCATGTACTCA-----  
TGCCCTTAACCC-----TGT-----

GTATG---CG-ACGTTG-----AAAATT-----CGAATC-TATTTTTATG-----  
-----ATTCGATA-----ACAA-----A-----  
-----TTAATAAAATTTTATATTTTA---TT-----  
GAATGAT----TTTCGA-----GTACA-----  
---TGC GTTATATAT---GATCTGTCT-----  
GTTGCGAAACGAACAGCTCTAATAACATTGTTAATACATATAACGCCT-----  
AACTGTTCAAGGTACAACATCACT-----AAGTATTTAAAT-CTATTTAAATAAGT----  
TCTCCCAGAAGCTGTTCGTC--GA-----TGTCGTCCAT--ACTTGGAAGTTGAGAAA-----  
-----TGCCTTGT-----GGAGATCCAATGCTCTCCTCAG-----  
-----GTTGTGGTTGAACCTGATTTGTAAG--TGG-----  
TATATCCTGGTGTGGTGT--AGAG--GGGATCCTCTACGC--TGATTATCTTGAAATAGAGGGGAT-----  
TTGTTATCTCCCAGATATA-----GACGC-----CATCTCTGCTTGAGGCACAGTGA-----  
-----TAGG--TTCCCCTG--TGC GTGAATCCA--TTGTTCTGCAG--TCGATGT-----  
----GAATGTATATGGAACAGCCA-----  
-----CAG--TTCAGGTCAA-----  
-----  
TTCGTGCGCCTTCTAA-----  
TAGCTCTTCGTTTAGCTGCTCTGTGTTGAGCTTT-----GA-----T-----  
AGAGGGGGGAGTTGAGGAAGACGAATTTTCGCATTATGGAAAGTCCAGTTCTTTAGTGGAGTGTTTT-----  
CCTCTTTGTGCGAGGAAAACTTTATA-GCTAGCACCTCTCCAGGATTGCACAGCACGATTGACGGGATACCTCCTTTA--  
-ATTTGAACTGGCTTTCGTTATTTACAGTTAGTCTGCCAATCTCTTTGGGCC--CCAATGAGTTCTTT-----C--  
CAAT--  
GTTTCAACTTTAGATATTGCGGTGTGACATCATCGATGACGTTATACTCAACCTTGTTTGGAGTAAACCCTAGAATTGAGA  
TCCAA---ATGCCCGCTCAAATAATTAT--GTGGGCCTAG-----  
TGAACGAGCCCACATAGTCTTTCCCGTCCGACTATCGCCCTCGATGAT-AATACTAATAGGTCTCTC-----  
-----  
CGGC-----C-----  
-----GCGCAGCG-GAACTCTT-----TC-----  
-----  
CAAA-----ATA--ATTT-----TCAG-CCCATGTCTCATCTCGTCTGGCAGGTTAGTAAATGAT--G-----  
AGACGTG--GAACGGAGG---AAGCCATGGTTCAGGAGTCTTATCAAAT-ATCCTATCTAAATTGCTATT--  
TAGATTGTGGAA--CTGAAATAAATATTTTTC-TGGGATTTT-----CTCTCTAATTAT-CTGCAGGGCT--  
TCTTCT-----TTGGAA-----GAAGCATTTAA---CGCCTCTGCTGCAG-CGT----  
CGTTAGATGTT-----TGGCAACCTCCTCTA-----  
-----GCACTTC--GACCGTCGACCTGGAATT-----CTCCCAT--ACAAGAGTATCT-  
CCGT-----CTTT--GTGCATGTACGTCTTG-  
ACGTC--GGAAGACGATTTAGCTCTCTGAATGT-----TTGGATGGAA-----AT--  
GTGCTGACCTTGTGGGGATACCA-----  
GGTCAAGAATCGTTGATTTTGGCAGCAGTATTTCCCTCGAACTGAATAAGCACGTGGAGGTGAG-GTTGCCCATC---  
-----TTCATGAAGCTCTCTGCAGATTTTATGAATTT--T-----TTGTTAATCGGAGTG---  
-----TTTAGGGCTTGAATTGAGAAAAGTGATTCTTCTTTGGACAAGGAGCA---  
CTGAGGATATGTAAGAAAATAAT-----TTTGGCATTATTTGAAA-----  
-----CCGT-----  
TTGGATGCGATGGCATT-----TTTGAATTAAG-----  
AGGCTTACTACCAATTGAGGAGGGG-----  
-----CTCCAAAAGTT-----  
-----ATA--TGAATTGGTAGTA-----  
--AGGTAGCTC-----TTATATATTA--GAAGTTCCTAAG-----GGGCAC-----  
-----GTGG-----CGGCCATCCGT-T-----  
-----  
-----TAATATT

>TLCJV\_AB100304  
-ACC-----GGATGGC--C-----  
-----GCGA-TTTTT-----  
TTAAAGTGTCCCCCCTAACAAATGTCCCC---CAATCAG-AACGCGC-----  
-----CCTCAA-----AGCT--  
AAATTATTAACCTGGTCCC-----CTATTT-----ATACTTAGTCTCCAAGTA-----  
-T-TATGTTAAAC---ATGTGGGATCCCCCTCGTAAACGAATTCACAGAG-----  
ACTGTTACGGTCTACGGTGTATG---CTAGCCGTAATA---TCTTCAA-----  
TTAGTTGAAGCTACGTATCTCC-----TGATACGATTGGGTA-----CGATCTTGTACGCGAT-

TTAATT-----TCAGTAATTCGTGCTCGCAATT-----ATGTCGAAGCGTCC-----C-----  
-----GCCGATATA-----GTCATTTCCACTCCCG-----CCTCGAA-----GGTA-----  
CGTCGTCGTCTGAAC-----TTCGA-----CACACCCGC-----GATGAGC-----  
CGTGCTGCTGCC-----  
-----CCCA-----  
CTGTCCTCGTCAACCAAAAAGAAGGACATGGACCAACAGGCCCAT-GTATCGCAAGCCCAG-----  
-----AAT-----GTACAGAATGTACAG-----  
-----AAGCCCTGATGTGCCCA-----AAGGTTGTGAAG-----  
-----GCCCATG-----TA-----  
AGGTCCAGTCTTTTGAGTCTAGACACG-----ATGTTAGTCACGTGGGTA-A---GGT-C-----  
-TGTTGTATAAC-----TGACGTCACTAGGGGTTTA-----GGTTTGACACATAGGAC-----  
-----GGGTAA-----GAGGTTT-----TGC---GTTAAGTCCG-----  
-----TCTACATAATGGGCAAGGTC-----TGGATGGATGA-----  
-----GAATATCAAGA-----CCAAGAATCA-----  
CACTAACACAGTTAT-----GTTTTTCTAGTCCGTGATCGAAGACCTTAT-----  
-TCAAGT---CCTCAGGATT-----  
-----TTGGTCAGGTGTTT-----AACATGTAT-----G-----  
-----ACA-----  
ATGAGCC-----AAGTACAGCTACT-----GTCAAGAACG---A-TATGCGAGATCGTTTTTCAG-----  
-----GTCTTACGGA---AA-----TTCACA-----  
TCAACTG-----TTACTGGTGGTCAGTA-----  
-----TGCATGCAAGG-----  
-----  
-A-----GCAGTCTCTCGTCAAACGTTTTT-----  
-----TTAGA---GTTAATAATC-----  
ATGTAGTTTATAATCATCA--A-----GAGGCGGAAAGTATGAGAACCATACT-----  
-----  
-----GAGAACGCTCTTTTAT-----TATATAT-----GGCTTGACTCA-----  
TGCCAGTAACCC-----AGT-----  
GTATG---CT-ACTTG-----AAAATC-----AGAATC-TATTTCTATG-----  
-----ATTCTGTT-----CAA-----A-----  
-----TTAATAAAGATTAAATTTTA---TT-----  
ATATGAG---ATTGTG-----TTACA-T-----ATTC-----  
TGTGTTTTTCCAATACATCC-----CAT-----  
AAAACATGATCACATGCTCTAATTACATTGTTAATACTAATTACACCC-----  
AAATTATCTAAATATTTTCATACAT-----TGAACCCATAAATACTCTTAAGAAACGC-----  
CAAGTCTGAGGTGT-----AA-----GCGAGTCCAG--ATCTGGAAGATCAGAAA-----  
-----ACACTGGT-----GTATTCCCAACGCTTTCCTCAG-----  
-----GTTGTGATTGAACTGTATTCCGGATCGTTAT-----  
GACGTCGTGGTTGGTGT-----GAA---TATCTCTCGTGGTGTGATTATCTTGAAATAGAGGGGAT-----  
TTTTGATCGTCCAGGTATA-----CACGC-----CACTCTCGCATTGAGTTGCAGTGA-----  
-----GTAA---TTCCCCTG--TGCGTAAATCCA--TGATTGCACAG--TCTATTC-----  
-----CGAAGTAGTAAGAACACCCG-----CAC---GTTAGATCAA-----  
-----  
TTCTACGCCTGCGAACTGGC-----  
CTCCTCTTGGCTATTCTGTGTTGCACTTTGATTG-----GTACCTGAGT-----  
ACAATGGGCTGTTGAGGGTGACGAATTCTGCATTCCTTTATAGCCACTCTTTTAATGCCGAATTCT-----  
TCTCTTCGTCCAAGTACTCTTTATATGATGATGTTGGG-CCTGGATTGCAAAGGAAGATAGTTGGGATTCACCTTTA--  
-ATTTGAATTGGTTCCCGTACTTGGTGTGCTTTGCCAGTCCCTTTGGGCC--CCCATGAATTCCTT-----A--  
AAGT--G-----  
CTTTAAGTAGTGGGGTTCGACGTCATCAATGACGTTGTACCAGGCATCATGCTGTATACCTTTGGGCTCAGATCTAA--  
--ATGACCGCACAAATAATTAT--GTGGGCCTAA-----  
AGAACGAGCCACATCGTCTTCCCTGTACGGCTCTCACCCTCTATGAC-AATACTAACAGGTCTCCA-----  
-----  
TGGC-----C-----  
-----GCGCAGCG-GCATCCCT-----T-----  
-----  
-----ACGTTTTTCG---G-AAACCCAGCACTCAAGTTCTTCTGGAAC TTGATCGAAAGAA--G-----  
AAGAAAG--AAATGGACA---AACAAAACCTCTGCACGAGGTGTAAAA-ATCCTATCTAAATTAGCTTT--



AATATTATGATA--TTGAAAAATAAAATCTTT-AGGGAGCTC-----CTCTCTAATAAT-AGCTAAAGC-----  
-----TGCTTCGGCTGAACCTGAATTTAG----GGCCTTTGC-AGCTGTGT-----  
CGTTAGCCGTC-----TGTTGACCTCCTCGA-----  
-----GCACTTC--TTCGGTCGACCTGGAATT-----CTCCCAT--TCCAGTGTGTCT-  
CCGT-----CCTT--GTGCATATAAGACTTG-  
ACGTC--GGAGCTTGATTTAGCTCCCTGAATGT----TCGGATGGAA-----AT--  
GTGCTGACCTGGTAGGGGATGTAA-----  
GGTCGAAGAATCTGTTATTTTGGCACTTGAATTTCCCTTCGAACTGGATAAGCACGTGCAGATGAG--GGCTCCCATC---  
-----TTCATGGAGTTCTCTGCAGATTTTGATGAATTT--T-----TTATTTGTTGGGGTG---  
-----TTTAGGTTTTGTAATTGGGAAAGTGCTTCTTCTTTAGTGAGAGAGCA---  
CTGTGGGTATGTGAGGAAATAAT-----TTTTGGCATTATTAAAAA-----  
-----ACGTT-----TGGG---  
AGGTGCCATT-----T-GACT---TG-----GT---CAATCGGGTCTCAA-  
-----CAAAGTTG---CGT-----  
-----TAGCAA-----TCGGGA-A-----TGGGTCTCA-----  
ATATATAGT---GAGGACCTAAATGGCATTATTGTAATTCGAAAGTAA-----  
TTCAAATTTCAAATTTGAATCCA-----ATAG-----CGCCATCCGTA-----  
-----TAATATT  
>TLCNDV\_U15015  
-ACC-----GAATGGCCGC-----  
-----GCAAATTTTT-  
-AGGTGGGCC------TCAAC---CAATGA--AATTCAC-  
-----GCTACAT-----GGCC--TATTTAGTGCCTGGGGAT-  
-----CAATAAAT-----AGACTTGCTCACCAAGTT-----  
TGGATCCACAAACATGTGGGATCCATTATTGCACGAATTTCCCGAA-----  
AGCGTTCATGGTCTAAGGTGCATG---CTAGCTGTAAAATA-----TCTCAA-----  
GAGATAGAAAAGAACTATTCACC-----AGACACAGTCGGCTA-----CGATCTTATTCGAGAT-  
CTCATT-----CTTGTTCTCCGAGCAAAGAACT-----ATGGCGAAGCGACC-----A-----  
-----GCAGATATC-----ATCATTTC AACGCCCG-----CATCGAA-----GGTA---  
CGCCGACGTCTCAAC-----TTCGA-----CAGCCCCTA-----TGGAGCT---  
CGTGCAGTTGTC-----CCCA---TTGCCCGCGTCAC---  
CAAAGCAAAGGCCTGGACCAACAGGCCGAT-GAACAGAAAACCCAG-----AAT-  
-----GTACAGAATGTATAG-----  
AAGTCCCGACGTGCCAA-----GGGGCTGTGAAG-----  
GCCCTTG-----TA-----AAGTGCAGTCCTTTGAATCTAGGCACG-----  
-----ATGTCTCTCATATTGGCA-A---AGT-C-----ATGTGTGTTAG-----  
TGATGTTACCCGAGGAACT-----GGACTCACACATCGCGT-----AGGGAA-  
-----GCGATTC-----TGT--GTGAAATCTG-----  
TCTATGTGCTGGGAAAGATA-----TGGATGGATGA-----  
AAACATCAAGA-----CAAAAAACCA-----  
TACTAACAGTGTTCAT-----GTTTTTTCTGGTTCGTGACCGTCGTCCTACA-----  
-GGATCT--CCCCAGGATT-----  
-----TCGGGGAAGTGTTT-----AATATGTTT-----G-----  
-----ACA-----  
ATGAACC-----GAGCACAGCAACG-----GTGAAGAACA--T-GCATCGTGATCGTTATCAA-----  
-----GTCTTACGGA--AG-----TGGCAT-----  
GCGACTG-----TGACGGGAGGAACATA-----  
-----TGCATCTAAGG-----  
-A-----GCAAGCATTAGTTAGGAAGTTG-----  
-----TTAGG--GTTAATAATT-----  
ATGTTGTTTATAATCAACA--A-----GAGGCCGGCAAGTATGAGAATCATACT-----  
-----GAAAACGCATTAATGT-----TGTATAT-----GGCCTGTACTCA-----  
CGCATCAAATCC-----TGT-----  
ATATG--CT-ACTTG-----AAAATC-----CGGATC-TACTTTTATG-----  
-----ATTCGGCC-----ACAA-----A-----

-----TTAATAAATATCCAGTTTTA---TA-----  
TCATACG----AAGTCC-----ATACA-T-----CAAT-----  
TGTTTGCTCCAATACATTA-----TCC-----  
AATACATGATAAACTGCTCTTATTACATTATAAATTCCTATGACACCT-----  
AACATATCCAGGTACTTAAGGACC-----TGGGTTTTGAAGACTCTCAAGAAAATC----  
CCAATCTGAGGGCGT----AA-----GCCCGTCCAG--ATTTTGAAGTTAGAAA-----  
-----ACACTTGT-----GAAGTCCCAGGGCTTTCCGCAG-----  
-----GTTGTGGTTGAACTGTATTTGAATCTTGAT-----  
TATGTCGTGCTGTGTTAG----GAA--GGGCTGCTGTCTGTTTCAAAAATTTTGAATACAGGGGAT-----  
TTCGAATTTCCAGGTATA-----TACGC-----CACTCTCTGCTCGATCCGCAGTGA-----  
-----TGTA--TTCCCCTG--TGCCTGAATCCG--TGATCATGGCAG--TTGATCG-----  
----ATATGTAATACGAACAACCA-----  
-----CAC--GGTAGATCAA-----  
-----  
CTCGCCTCCTGCGAATG-----  
CTCTTCTTCTTCTTCTGAGAGCGATGTTTTCG-----CGACCGGAAT-----  
AGAGTGGTTCTTCGAGTGTGATGAAGACTGCATTCCTTGATTGCCACTGCTTCAGTGCTGCATTTT-----  
TTTCTTCATCCAGATATTCCTTATA-GCTGCTGTTTGGACCTTTATTGCACAGGAAGATAGTGGGAATTCACCTTTA--  
-ATCATGACCGGCTTTCCGTACTTTCGTGTTGCTTTGGCAGTCACGCTGGGCC--CCCATGAATTCCTT-----A--  
AAGT--G-----  
CTTTAGATAGTGGGGATCAACGTCATCAATGACGTTGTACCAGGCATCATTGCTATAGACCTTTGGGCTCAGATCAAG--  
--ATGTCCACACAAGTAATTGT--GTGGTCCATA-----  
GCACCGAGCCACATCGTTTTGCCCGTCTACTATCCCCCTCTATGAC-TATGCTTATGGGCCTAAA-----  
-----  
AGGC-----C-----  
----GCGCAGCG-GCACACAC-----A-----  
-----  
-----ACATTAGAC----GAGA-CCCAATCGACGAGGTCTGCCGAACTCTGTCTGAAGGAT--G-----  
AAATTGA--AAATGGAGA----AACATAAACCTCGGAAGGAGGTTGAAAA-ATACGATCTAAATTTGGTATT--  
TAAATTTGTGAAA--CTGCAGAACGTAATCTTT-TGGGGCTAA-----TTCTTTAATAC-TCTCAAAGCA--  
TCGTCT-----TTATTT-----CCCGTGTTAAT----CGCCTGGGC-ATATGCAT-----  
CGTTCCGCCGTT-----TGTTGACCACCACGG-----  
-----GCAGATC--GTCCATCGATCTGGAAAA-----CACCCCAT--TCTAGAACGTCT-  
CCAT-----CTTT--GGCGATGTAGTTTTTTG-  
ACGTC--CGACGCTGATTTAGCTCCCTGAATGT----TCGGATGGAA-----AT--  
GTGCTGACCGACTTGGGGAAACCA-----  
AGTCGAAGAATCTGTTATTTTTGCACTGGAATTTCCCTTCGAATTGGATGAGAACATGGATATGCG-GAGACCCATC---  
-----TTCGTGAAGCTCTCTACAGATCTTGATGAATTT--C-----TTCTTCGTCTGGGGTT--  
-----TCTAGGGTTTGAATTTGGGAGAGTGCCTCTTCTTTAGTTAGAGAGCA---  
CTTTGGATATGTGAGGAAATAGT-----TTTTGGCATTACTCTAAA-----  
-----ACGAC-----GTGG---  
CGAAGCCATA-----AAACT----TG-----TCGTTTTGATTCGGCGTCCC-  
-----  
-----TCAACTTA----TCT-----  
-----ATATGA-----TTGGTGTC-----TGGAGTCCCT-----  
ATATATAGGT--AAGACCCATATGGCATTATGTAATTTTGAAGAAGAA-----  
ATTACTTTAATTCAAATTCCT-----AAAG-----CGGCCATTCGTA-----  
-----  
-----TAATATT  
>TLCSV\_AY044137  
-ACC-----GGATGGCCGC-----  
-----GCCCTCTTT-----  
TTAGTGGGTCCCACTCA--CGTCGTATCAAC---CAATCAA-AATGCAT-----  
-----CCTCAA-----CGTT--  
AGATAAGTGTTTCAATTTGT-----CCTTAT-----  
ATACTTGGTCCCAAGTTGTTTGTCAA-----GCAATATGTGGGATCCACTTCTAAATGAATTTCTGAA-----  
-----TCTGTTTATGATTTTCGTTGTATG---TTAGCTATTAATA-----TTTGCAG-----  
GCCGTTGAGGAACTTACGAGCC-----CAATACATTGGGCCA-----CGATTTAATTAGGGAT-  
CTTATA-----TCTGTTGTAAGGGCCCGTGATT-----ATGTCGAAGCGACC-----C-----  
-----GGCGATATA-----GTCATTTCCACGCCCG-----TCTCGAA-----GGTT--

CGCCGAAGGCTGAAC-----TTCGA-----CAGCCATA-----CAGCAGC---  
CGTGCTGCTGTC-----  
-----CCCA-----  
TTGTCCAAGGCACAAACAAGCGACGATCATGGACGTACAGGCCCAT-GTATCGAAAGCCAG-----  
-----AAT-----ATACAGAATGTATCG-----  
-----AAGTCTTGATGTTCCCC-----GTGGATGTGAAG-----  
-----GCCCATG-----TA-----  
AGGTCCAATCGTTTGACAAGCGCCATG-----ATTTGAAGCATACGGGTG-A---GGT-A-----  
-TTGTGTGTTTC---AGATGTAACACGTGGTAAT-----GGCCTTACTCATCGTGT-----  
-----TGGGAA-----ACGTTTT-----TGT-ATCAAGTCTA-----  
-----TTTACATTGTTGGCAAAGTG-----TGGATGGATGA-----  
-----GAACATTAAGG-----TGAAGAATCA-----  
TACTAACACTTGTAT-----GTCTGGCTTGTTCGGGATCGTCGTCCAGTT-----  
-ACTACT--CCCTATGGA-T-----  
-----TTGGAGAATTGTTT-----AACATGTAT-----G-----  
-----ATA-----  
ATGAGCC-----ATCTACTGCCACT-----ATTAAGAATG---A-TCTGCGGGATCGTTGTCAG-----  
-----GTTCTTAAGA---GG-----TTCACT-----  
GCTAGTT-----TGAGTGGTGGTCAATA-----  
-----TGCCTCCAAAG-----  
-----  
-A-----GCAATGTGTCATTAGGCGATTTT-----  
-----ATAAG---ATTTATAACC-----  
ATATTGTTTATAATCATCA--A-----GAGCAGGGGAAATATGAGAATCATACT-----  
-----  
-----GAGAACGCTCTTTTAC-----TGTATAT-----GGCATGTACTCA-----  
TGCTTCTAATCC-----AGT-----  
GTACG--CT-ACTCTT-----AAAATA-----AGGGTG-TACTTCTACG-----  
-----ATTCAATA-----TCGA-----A-----  
-----TTAATAAAATTTATATTTTA---TA-----  
TCGTGAA-----TCTCGG-----TTACA-T-----TTAT-----  
TGTGTTTTCAAGTACATTA-----TAC-----  
AATACATGATCAACTGCTCTAATTACATTGTTAATGGAAATTACACCA-----  
ATATTATTTAAATATCTAAGAACT-----TGATATCTAAATACTCTTAAGAAACGA-----  
CCAGTCTGAGGCCGT-----AA-----GGTCGTCCAG--ATTCGGAAGTTGAGAAA-----  
-----ACATTTGT-----GAATCCCCAGTACCTTCCCTGAT-----  
-----ATTGTGGCTGAATCTTATCTGCATGGAAAT-----  
GATGTCGTGGTTCATTAG-----AAA--TGGCCTCTCGTTGTGTTCTGTTATCTTGAATATAGGGGAT-----  
TGTTTTATCTCCAGATAAA-----AACGC-----CATCTCTGCTTGATGAGCAGTGA-----  
-----TGAG--TTCCCCTG--TGCCTGAATCCA--TAGTTGATGCAG--TTGATGT-----  
-----GGAGGTAGTATGAGCAGCCA-----CAA--TCTAGGTCTA-----  
-----  
CACGCTTACGCCCTGATTGGT-----  
TGTTTTCTTGGCTATTTTGTGTTGGTCCTTGATTG-----GTACTGGAGA-----  
ACAGTGGCTCGTAGAGGGTGACGAAGGTTGCATTCCTGAGAGCCCAATTTTTCAAGGAAATATTTT-----  
TTTCTTCGTCTAGATATTCCTTATATGAGGAGGTAGGT-CCTGGATTGCAGAGGAAGATAGTGGGAAATCCCCCTTTA--  
-ATTTGAATGGGCTTCCCATACTTTTGTGTTGCTTTGCCAGTCCCTCTGGGCC--CCCATGAATTCCTT-----G--  
AAGT--G-----  
CTTTAAATAATGCGGGTCTACGTCATCAATGACGTTGTACCACGCATCATTACTGTACACCTTTGGACTTAGGTCTAG--  
--ATGTCCACATAAATAGTTAT--GTGGCCTAG-----  
AGACCTAGCCCACATTTGTTTTGCCTGTTCTGCTATCACCCTCGATGAT-AATACTGTTAGGTCTCCA-----  
-----  
TGGC-----C-----  
-----GCGCAGCG--GAAGACAT-----G-----  
-----  
-----ACGTTCTCG-----GACA-CCCATACTTCAAGTTCCTCTGGAAC TTGATTAAAAGAA--G-----  
AAGATAA--AAAAGGAGA---GATATAAGGAGCCGGAGGCTCCTGAAAA-ATTCTATCTAAATTAGAATT--  
TAAATTATGAAA--CTGTAATAATAATCTTT-CGGTGCTAA-----TTCTTTAATGAT-TCTAAGAGCC--  
TCTGAC-----TTACTG-----CCTGCGTTAAG---TGCTGCTGC-GTAAGCGT-----

CATTGGCTGAT-----TGTTGTCCTCCTCTT-----  
-----GCAGATC--TCCATCGATCTGAAACT-----CACCCCAA--TCGATGGTGTCT-  
CCGT-----CTTT--ATCGATGTAGGACTTG-  
ACATC--AGATGAGGATTTAGCTCCCTGAATGT----TTGGATGGAA-----AT--  
GTGTTGATCTACTTGGGGATGCCA-----  
GGTCAAGAATCTGTTATTCGTGCACTGGTACTTGCCTTCGAACTGAACAAGGGCATGCAGATGAG-GTTCCCATT---  
-----CTCGTGGAGCTCTCTGCAAATTTAATGTATAA--T-----TTATTTACAGGAGTT---  
-----TCGAGGGTTTGTAGTTGGGAAAAGTGCTTCGGATAAAGAAAAGAGAACA---  
CTGGGGATAAGTAAGGAAATAAT-----TTTGGCATTATTTTAAA-----  
-----ACGCT-----TTGG---  
GGGAGCCATT-----TGGTCA--AT-----GTACCCCGATTGACTTGGAT-  
-----  
-----TTCATTTA---TCC-----  
-----CTGCAA-----TCGGTGTAG-----TGGGGTACA-----  
ATATATACT---TGTACCCCAAATGGCAAATTTGGTAATT-----  
TAGTAAAAGTATATTGCAATTCAAATTTCAAAATTCAAAATCAAATCAATCACT-----AAAG-----  
CGGCCATCCGTA-----  
-----  
-----TAATATT  
>TLCYV\_AJ512761  
-ACC-----TGTGGGC--C-----  
-----GCGATTTTTTT-----  
TTAAAGTGGGCCCGTTGATGTGATATGTCATC---CAATCAG-AACGCTC-----  
-----CCCCAA-----AGCT--  
TAATTGTTTTGTGGTCCC-----TTATTT-----AAACTTGCTCACCAAGTA-----  
-G-TGCACTCCGCACTATGTGGGATCCATTATTAACGAGTTTCCCGAA-----  
ACCGTTCACGGCTTTAGGTGTATG---TTAGCAGTTAAATA-----TCTGCAG-----  
TTAGTAGAGAAGACTTATTCGCC-----TGATACATTAGGGCA-----CGATTTAATTAGGGAT-  
TTAATT-----TCAGTTATTAGGGCTAGAAATT-----ATGTCAAGCGACC-----A-----  
-----GCAGATATA-----ATCATTTCCACGCCCCG-----CTTCGAA-----GGCA---  
CGCCGCCGTCTCAAC-----TTCGA-----CAGCCATA-----TGTGAGC---  
CGTGCTGCTGCC-----  
-----CCCA---TTGTCCGCGTCAC---  
CAAAGCAAGATCATGGACGAACAGGCCCAT-GAACAGAAAGCCCAA-----GAT-  
-----GTACAGGATGTACAG-----  
AAGTCCAGATGTCCCTA-----GAGGATGTGAAG-----  
GCCCATG-----TA-----AGGTTCAATCTTTTGTGCTAAGAACG-----  
-----ATATTGGTCACATGGGCA-A---GGT-C-----TTATGTTTGTGTC-----  
CGACGTTACCCGTGGTATT-----GGGCTTACCCATCGAGT-----TGGCAA-  
-----GCGTTTC-----TGT--GTCAAATCAC-----  
TTTATTTTTGTTGGCAAGATC-----TGGATGGATGA-----  
AAATATTAAGG-----TTAAGAACCA-----  
CACTAACACCGTTTT-----ATCTGGATAGTTAGAGATCGGCGTCCTACT-----  
-GGAACG--CCTAATGATT-----  
-----TTCAGCAGTCTTT-----AATGTATAT-----G-----  
-----ATA-----  
ATGAACC-----TAGCACTGCTACT-----GTGAAGAACG--A-TCAGCGTGATCGTTTTTCAG-----  
-----GTTATAAGGA--GG-----TTCCAG-----  
GCAACGG-----TGAAGTGGTGGACAATA-----  
-----TGCAGCGAAGG-----  
-----  
-A-----GCAGGCGATTATTAGAAAGTTTT-----  
-----ATCGT--GTTAATAATT-----  
ATGTAGTTTACAATCATCA--G-----GAAGCTGGCAAGTATGAGAACCATAACC-----  
-----  
-----GAAAATGCTTTGTTGT-----TGTATAT-----GGCATGTACTCA-----  
TGCCTCTAATCC-----TGT-----  
GTATG--CT-ACTTG-----AAAGTC-----AGGAGT-TATTTTTATG-----  
-----ACTCAGTG-----ACGA--A-----  
-----TTAATAAAGATTGAATTTTA--TT-----

ATATTAG-----AATTG-----TTACA-T-----ATTC-----  
TGTTTTTCCCAATACATCC-----CAT-----  
AATACATGATTACATGCTCTAATTACATTGTTAATACTAATTACACCC-----  
AAATTATCTAAATATTTTCATACAT-----TGAACCTTAAATACTCTTAAGAAACGC----  
CAAGTCTGAGGTTGT-----AA-----GCGAGTCCAG--ATCTGGAAGCTCAGAAA-----  
-----ACACTGGT-----GTATCCCAACGCTTTCCCTCAG-----  
-----GTTGTGGTTGAACTGTATTTGGATCTGTAT-----  
GATGTCGTGTTTGGTGTT-----GAA--TGGTCTCTCGTGGTGCTTGGTTATCTTGAATAGAGGGGAT-----  
TTCTGATCGTCCAGGTATA-----CACGC-----CACTCTCGCATTGAGTTGCAGTGA-----  
-----GTAA--TTCCCCTG--TGCGAAAATCCA--TGATTTGCACAA--TTTATGC-----  
----CGAAGTAGTATGAGCACCCA-----  
-----CAC--GTTAGATCAA-----  
-----  
CTCTCCGCCTGCGAACTGGC-----  
CTCCTCTTGGCTATTCTGTGTTGCACCTTGTATTG-----GTACCTGAGT-----  
ACAATGGGCTGTTGAGGGTGATGAATTCCGCATTCCTTTAATGCCACTCTTTTAAAGCTGAATTCT-----  
TTTCTTCCCTCCAAGAATTCTTTATATGATGATGTTGGG-CCTGGATTGCAAAGGAAGATAGTTGGGATTCCACCTTTA--  
-ATTTGAATTGGTTCCCGTACTTGGTGTGCTTTGCCAGTCCCTTTGGGCC--CCCATGAATTCTTT-----A--  
AAGT--G-----  
CTTTAGATAGTGGGGGTCTACGTCATCAATGACGTTATACCAAGCATCATTACTGTACACCTTTGGACTCAGATCCAG--  
--ATGACCGCACAGATAATTAT--GTGGGCCCAA-----  
TGAACGCGCCACATGGTTTTTCTGTACGACTCTCTCCCTCTATGAC-AATACTGATGGGTCTCCA-----  
-----  
TGGC-----C-----  
----GCGCACCG-GCATGCCT-----T-----  
-----  
-----ACATTATCA---GCAGCCCCATTCCTCAAGTTCTTTGGGAACTTGATCCAAATGATGA-----  
AAGATAA--AAAAGGAGA---ACCAAAAACCTCTAAAGGAGGTGCAAAA-ATCCTATCTAAATTAGCATT--  
TAAATTATGAAA--TGTTAAAACAAAATCTTT-AGGAGCTAA-----CTCCTTAATTAC-ATTAAGAGCC--  
TCTGAC-----TTACTGCCGCTG-----TTAAG----TGCTGGGC-GTAAGCGT-----  
CATTGGCTGTC-----TGTTGACCCCTCTT-----  
-----GCAGATC--TTCCGTCGATCTGAAACT-----CTCCCAT--TCGAGGGTGTCT-  
CCGT-----CCTT--GTGCATGTAGGACTTG-  
ACGTC--GGAGCTGGATTTAGCTCCCTGAATGT----TCGGATGGAA-----AT--  
GTGCTGACCTGGTTGGGGATACCA-----  
AGTCGAAGAATCTGTTATTCGTGCAGACGATTTCCCTTCGAACTGGATAAGCACGTGGAGATGAG--GGCTCCCATC---  
-----TTCGTGAAGCTCTCTGCAGATTTTGATATATTT--T-----TTATTAGTTGGTGTC---  
-----TCTAGGGCTTGTAATTGGGAAAGTGCTTCTTTGTTGAGAGAGCA---  
CTGTGGATAAGTGAGGAAATAAT-----TTTTGGCTTGATTTTAAA-----  
-----ACGTT-----TGGG---  
AGGAGCCA-T-----T-GACT---TG-----GT----CAATTGGAGACATT-  
-----  
-----CATAGTT-----CTC-----  
-----TGTCAA-----TTGGAG--A-----CAGGAGACA-----ATATATAG-  
---GTGTCTCCAAATGGCATAGTGGTAATTTCTCATAGAAA-----TTCCACTTT--  
AATTTGAAATCCA-----AAAG-----CGGCCATCCGTA-----  
-----  
-----TAATATT  
>TPCTV\_x84735  
-ACC-----GGAGTGCCT-----  
-----  
CCCTGGCCCTTTAAAATGTGGGTCCACATGAGGGTATTGTTGTC---TATCACTCTATCAA-----  
-----TTCC-----CGCT--  
CAATTATTGG-----GCCTCTGTTCACCTAAGGC-----  
-----CTTATAAGGCCCTTAATGAATTGGGCCCAAGTT-----TGTCTTTAT-  
-CTGCAGCTTTATATAAAGCTGCAGTTGCTTT-----CTT-----AAAGTAATGGCCACC-----  
--ACAAATTGTCGATT----TGTGGGTCCCTTTTTGCCTGCCCCATTAACG-----AACGCT-  
TCAGCGTTTGTGA-----ATCTCGAGGAGCTA-----C-----TCTGAGTGA-----  
---TTTTTGTCTGATTTT-----CGTAGAA-----AATA---CATAGA-----AAC-----  
TTC-----CCCGGGT---TTGATTTCTTAT-----

-----CTCA-----ATGCCTT-----ACAAGCGGAAATTAACGAGTT-AT-TTTCCGCAA-  
TCAA-----GAG-----GTTTCG-----  
CGGAGCG-----AAATCCGG-----CATG-----  
----GCAGTTGTGAAGACAAGTGCCAGCCGTCGTCTATA-----CAAAAAGGGAAAGCGG-----  
-AAGCCTGACCGTATAAAAACATATACGTATGCATTCTCTAGTATTTGTAAGTATA-----GGTAC-----  
--AATTGTATATA-----TGA-----ACAGCTGGTCTTTGGGTTTGGGTCCCTCAACAGCGTAG-----  
-----CAGTGA-----CATCGAGATT-----TG-----AAGTCGA-----  
-----TGTATATTCGCCTTACTGTT-----GCTCTGTCTGA-----  
-----AAATGCTGCTT-----CTCAAGTGAA-----  
GACCTATGTGGTTAA-----ATGGGCTCTAATTGTGGATCAGGTTCTGTT-----  
-GAAACC--CTAGTTGGTG-----  
-----TGCGGATGTGTAC-----AAGACTTGCCCTCTCCTTATCCTTATGT-----  
-----GCA-----  
GTGTGCC-----TA-TATTGCTG-----ATG---A-TAATCACAGTCGTTTCCAA-----  
-----GTGCTGAGGAGTGG-----  
TTTCTTAGTCTTAGTGTAATGGT-----CTTGCAAGTTGGATCTTC-----  
-----TACTAGAACTG-----  
-----G-----ATGTCGGCGATGAAGAA---T-----  
-----ATGGC---CTCTATTAAC-----  
---AAATTTTGTAATAAATTTAA--A-----TGTTAGATGCGTTTATGACGCA-----  
-----GATAGTGC--TACTGG-----CG-ATAT-----  
CGCCAGTATTAAGCGCGGTGCCGTTTATCT-----  
-----TGTAATCTGGCCTG-ACGTTG-----AAATCC-----  
GTTATG-GATTTTCATGTACTATGTATCATAGAAATGGAAATGCGTAA-----TAGAGTG---T-----  
-----TTAATACAATCTCATCTTTA---TA-----  
-----TTATAATAAAAACTTGA-----GCATAAA-----ATAC-----  
-----ACGCTGATCAAATAAATCA-----  
ATGAAGTGATTTATCGATCTAATTACATTATTTATACTAATAACACCT-----  
AAATTATTCAAATGTTTCATTACA-----TGAAATTTAAAT-----  
CTATCTAATAATGCTTCTCCACTCAGACGAGGT-----GA-----TACTGAAAAGT--  
ACCACCAAGTTCAGCCA-----ACAAATCT-----  
GGAGACCAACACTTTCCGCAG-----  
GTTGTGGTTGGCTCTGATTTGTAATGTTAT-----TATTTTGTTCCTCCGTC-----  
GCCATTGTTGTTGTGTTCTGGAGGCG-----GAAGTAAATTTGGGT-----  
TCTTGATGTGCGTCAAGTA-----ACAGC-----CAGTCTGGCACTGTGTGTACGTGA-----  
-----GTAA--TTCCCCTG--TGCGTGAATCCA-----TCCTCACAG--TCTATGC-----  
---CTCCGTAGTATGAGCAGCCG-----CAG---  
GAGAGGTGAATGGCCTTTTCGTCTCTTTTTCTTCGGTGCCCAAGTCAGTTTGGGGGTCGTTTTTTGATAGTTGGAGTTGT  
TGTTGCAGCTTCTTCGTCTCAAGTATTCTGGGTATAAGCACCTTTCGAGAAACCCTTCTTATCTCCCTATTTCTTA  
ATTCGTGCGCGCCTTTGTACACAGTACCATCGT-----  
ATAAGGGTTCAGTCAGTTTTATGAATACAGCATATAGAGTGTCCAATCTTTTAAAGCCTCATTCT-----  
CTTCTTATCGAGGAAGTCTTGGAA-AGAGGTGTCCCACCAGGGTTGCAAAGGACTATTGATGGGATGCCACCTTTA--  
-ATTTGAACTGGCTTTCCATATTTACAGTTTGGCTGCGAGTCTCTCTGGGCC--CCAATCAGCTCTTT-----C--  
CAGT--  
GCTTTAACTTTAAATAGTGCAGTGTGACGTCATCAATGACGTTATACAAGGCACTATTTGAATACACTCTGCTGTTAAAA  
TCTAA---GTGGCCGGATAAATAATTAT---GTGGGCCCAA-----  
GCTCCTAGCCACATTTGCTTGGCGGTCTAGACTCACCCTCAATTAT-AATACTTTTATATCTCAT-----  
-----C-----  
AGGC-----C-----  
-----GCGCAGCG-GCACTAAC-----TC-----  
-----ATA--ATCA----TCCG-CCCATTTCTGTCATATCTTCAGGAACGTTAGTAAATGAA--G-----  
ATAATTG--AAACGGAGG----GACAAACGGAGTTGGTGCCGGAGTAAAA-ATCCTATCTAAGTTAGAAAC--  
TAAATTATGATA--ACAAAATAAAAAATCTTT-AGGCAATTT-----TTCTTTTATAAT-TTGTAGAGCT--  
TCCTCT-----TTTGAG-----GAACGGTTTAG----GGCCTCTGC-ACATTCGT-----  
CGTTAGCTGTC-----TGCTGGCCTCCTCTA-----

-----GCAGATC--TAGCGTCAATCTGGAATT-----CTCCCAT--TCGATAGTGTCT-  
CCGT-----GGAGCTGGATTTAGCTCCCTGTATGT-----CCTT--GTCGACGTAGGAGTTG-  
ACGTC--GGAGCTGGATTTAGCTCCCTGTATGT-----TCGGATGGAA-----AT--  
GTGTTGACCTGGTTGGGGATACCA-----  
GGTCGAAGAATCGTTGATTTTTGCAGTTGAATTTCCCTTCGAATTGTATAAGCACATGGAGATGAG-GTTCCCCATT---  
-----TTCGTGTAGCTCTCTAGCTACTTTTTATGTATTT--T-----TTATTTGTTGGTGT---  
-----TGTAGCCTTTGAAGTTGGTTCGAGAGCTTCTTCTTTGGATAAAGAACA---  
ATTGGGATATGTGAGGAAATAGT-----TCTTGGCTGCTATTTGAAA-----  
-----ACGTT-----  
TGGGATTGGATGGCATA-----TTTGTAATATG-----  
TGTTGGTTACCAATTGGTT-----  
-----TGCTTTTTAATTC-----  
-----TCTAAA--TGAATCGGTAAC-----  
-TGGTACCCA-----ATTTATA-----  
-----GGGG-----AGGGCA-CCGTAT-----  
-----TAATATT  
>TSLCV\_AF130415  
-ACC-----GGATGGCCGC-----  
-----GA--TTTTTT  
-----TTGGACCTGGC---CCACTATCAGAAATT-----  
-----GCGT-----  
-----T-----GGGCCTTCTG-----  
GATAAAGTTAACCAATC---AGTACTCGTTGGGT-----AGTCTA-----  
ATTATTACT-AACTGGTCACCAAGTT-----GTT-----  
TTATGGT--CTA-----TAAATTTGT--CGTTATGTGTG-----TGGTCCAACCACGTAAAT-  
-----ATTGATAATGCCTAAGCGTGA-----T-----GCCCCATGG-----  
CGCTTAATGGCGGGTA-----CCCCTAA-----GGTG--AGTCGGTCCCTCCAAC-----CAG-  
-----TC-----TCCCCG--ACTGGTACTGG-----  
-----CCTA---AATTTGA-----TAAGGCCATGCCTGGGTTAACAGGCCCAT-GTATAGGAAGCCCAG--  
-----GAT-----ATATCGGGCTTGAG-----  
-----AACCCCCGACGTTCCAA-----  
GGGGCTGTGAAG-----GCCCATG-----TA-----  
AGGTCCAGTCCCTACGAGCAACGACACG-----ATATCTCCCACGTGGGGA-A---GGT-C-----  
-ATGTGCATATC---CGATGTCACACGTGGTAAT-----GGTATCACCCACCGTGT-----  
-----TGGTAA-----GCGGTTT-----TGT--GTTAAGTCTG-----  
-----TGTATATCCTCGGTAAGATA-----TGGATGGACGA-----  
-----GAACATCAAGC-----TGAAGAACCA-----  
CACGAACAGTGTGAT-----GTCTGGTTAGTCAGGGACCGTAGACCCTAT-----  
-GGTACG--CCTATGGATT-----  
-----TCGGCCAGGTGTT-----AACATGTTT-----G-----  
-----ACA-----  
ATGAGCC-----CAGCACTGCCACG-----GTCAAGACCG---A-TCTACGCGATCGTTACCAG-----  
-----GTCATGCACA--AG-----TTCTAT-----  
GGCAAGG-----TGACAGGTGGACAGTA-----  
-----TGCCAGCAACG-----  
-----A-----GCAGGCTATAGTCAAGCGATTCT-----  
-----GGAGG--GTCAACAACC-----  
ATGTGGTCTACAATCACCA--A-----GAGGCTGGCAAGTATGAGAATCACACG-----  
-----GAGAACGCCCTGTTAT-----TGTATAT-----GGCATGTACTCA-----  
TGCCTCTAACCC-----TGT-----  
GTATG--CT-ACTCTT-----AAGATC-----CGGATC-TATTTTTATG-----  
-----ATTCGGTA-----TTGA-----A-----  
-----TTAATAAAATTTGAATTTTA---TT-----  
GAATGAT-----TTTCCA-----GTACA-----  
---TGAGATACATAC---GACCTGTTT-----  
GTCGCGAATCGTACAGCTCTGATAACATTGTTAATGCAATAACACCT-----

AACCTATCTAAATACAATAAGACT-----AAATATTTAAAT-CTACTTAAGTAAGT-----  
CGTCCCAGAAGCTTGAAC--GA-----TGTCGTCCAG--ATTTGGTAGTTGAGGTA-----  
-----GGCTTTGT-----GTAGACTCAGCGCCTTCCTGAG-----  
-----GTTGTGGTTGAACCGTATTTGGATG--TGG-----  
TATATCCTGGTGTGCTGT--AAAT--TGGGTCCTCTACAT--TGATTATCGTGAAATAAAGGGGAT-----  
TTGGTACCTCCCAGATAAA-----AACGG-----AATTCTCTGCCTGATCCGCAGTGA-----  
-----TGCT--CTCCCCTG--TGCCTGAATCCA--TGGTTGGCGCAG--TCGATGT-----  
-----GCTGGTAGAACGAGCAGCCA-----  
-----CAG--TTTAGGTCTA-----  
-----T-----  
TCTCTTTTCGAC-----GAATCCTGGACTTTGCAATTTTGTGTTTAGGCTT-----  
-----GA-----T-----  
AGAGGGTGGAGTTGAGGAAGATGAATTTTGCATTGTGGAGTGTCCAATCTTTTAGTGCTTTGTTTT-----  
CCTCTTTTTCGAGGAACTTTTATA-GCTGGCCCCCTCACCAGGATTGCAGAGCACGATTGACGGTATTCCCCCTTTA--  
-ATTTGAACCTGGCTTCCCCTATTTGCAATTTGATTGCCAGTCTTTTGGGCC--CCAATCAGCTCTTT-----C--  
CAAT--  
GCTTCATCTTTAAATATTGCGGAGTGATGTCATCAATGACGTTGTATTCCGCTTCATTTGAGTAAACCTAGAAATTGAAA  
TCTAG---GTGTCCACTCAAATAATTGT---GTGGCCTAA-----  
GGCACGCGCCACATTGTCTTTCCCGTCCCTCGATTACCCCTCGATGAT-TATACTTATAGGTCTCTC-----  
-----  
CGGC-----C-----  
-----GCGCAGCG-GCATCCCT-----AC-----  
-----  
CAAA-----ATA--ATCA----TCTG-CCCATTCTTGCATCTCGTCCGGAACGTTTCGTGAACGAC--G-----  
AGAGTGG--AAACGGAGG---AACCCAGGGTCCGGAGCCTTTTGAAAG-AGCCGCTCGATGTTAGCTTT--  
GACGTTATGGTAGCTTACAATGAACGTCTT--TGGGTCTCC-----GGCCCTTATAAT-GTCGAGAGCC--  
TCTCCA-----GACTA-----GCTGCA-TTGA---CGGCGTTGTGGTAGACGT---CGTC-  
TTTGTT----TGA-----TTTT-----  
-----GTACCCCCAGAC-----ACCTTGATT-----GTCCGGAT--TCACAATAATCA-CCTT-----  
-----CTTT--GGTGATGTAATTCTGG-ACGGC---  
GTTGGTGTCTTTGGCTGCCTGTGCGT----TTGGATGAAA-----AT--  
TGGCAGACCTTCTGGGGTGAGTGA-----  
GGTCGAAAAATCTAGCATCCTTGATGTTGGACTTCCCGGAGAGTTGGATGAGACAGTGGAGGTGCG-GAAATCCATC---  
-----TGCGTGTTCCTCTCTGGCGACTCGTATGTACGT--TGTTTTGACTGACCATGGCAGAT---  
-----TTTGAAGCATTCAATA-----GTTTCATCTTTGGGGATATCACA---  
CTGTGGATATGTTAAGAAAATAT-----TTTGGCAGCTAGACGAAA-----  
-----TAAAT-----  
TAGGGTTCCGTGGCATT-----TTTGTAATATG-----AGCCAGGACACC-----  
AGGGGGAG-----  
-----CTCTCTCTAAAACCT-----  
-----TAT--TTTGCTGGTGTCC-----TGGTGTCCC-----  
ATTTATACTA---AAACCCTCTTGG-----GGACAC-----  
-----CAAGGGCAAATTCGGCCATCCGCAA-----  
-----  
-----TAATATT  
>TYLCCV\_AF311734  
-ACC-----GGATGGCCGC-----  
-----GCGATTTTTT-----  
TTAAAGTGGTCCCCCATGTGCGGTTTGTGTC---CAAT-AG-AAGGCGC-----  
-----TCCTCAA-----AGCT--  
TATTTATTAAATGGTCCC-----CTA-TA-----AAACGTAGCTCCCAAGTA-----  
-TATACGTTAAAC--ATGTGGGATCCATTGCTTAATGAGTTTCTGAA-----  
ACCGTGCACGGTTTTAGGTGCATG---TTAGCAATTAAGTA-----TTTGCAG-----  
TTAGTCGAAAATACATACTCCCC-----CGATACATTAGGTTA-----CGATTTAATTCGTGAT-  
TTAATT-----TCAGTTATTCTGTGCTAGAGATT-----ATGGCGAAACGTCC-----C-----  
-----GCCGATATT-----GTCATTTCCACTCCCG-----CCTCGAA-----GGTG---  
CGTCGCCGGCTGAAC-----TTGCA-----CAGCCCTA-----TACGGGT---  
CGTGTGCTGCC-----  
-----CCCA---CTGTCCGCGTCAC---  
CAGAAGACAAATGTGGTCAAACAGGCCCAT-GTACCGGAAGCCCAT-----GAT-



-----GTACCGGATGTACAG-----  
AAGCCCTGATGTTCCAA-----GGGTTGTGAAG-----  
GCCCATG-----TA-----AAGTTCAATCATGTGAGGCCCGTCATG-----  
-----ATGTTTTACATACTGGTA-A-----GGT-T-----ATTTGTGTATC-----  
GGATGTTACTCGTGGTAAC-----GGTATTACTCACCGTGT-----TGGCAA-  
-----GAGGTTT-----TGT--GTTAAATCCA-----  
TTTACGTCATTGGGAAAATA-----TGGATGGACGA-----  
AAATATTAAT-----TTAAGAATCA-----  
TACAAATACAGTAAT-----GTTTTTTCTTGTAGAGATCGACGTCCAAGT-----  
-GGTACT--CCTATGGATT-----  
-----TCCAGCAAGTCTTT-----AATTGTTAT-----G-----  
-----ACA-----  
ATGAACC-----TAGCACTGCTACT-----GTAAAAAACG--A-TTTAAGGGATCGTTTTCAA-----  
-----GTTTCGTCGTA--AA-----TTTTAT-----  
TCAACGG-----TTACGGGCGGACAGTA-----  
-----TGCTTGTAAGG-----  
-----  
-A-----GCAGGCGTTGGTGAAGAGATTTA-----  
-----TCCGT--CTTAATACTC-----  
ATGTTGTTTACAACCATCA--A-----GAACAGGCGAAGTACGAGAATCATACG-----  
-----  
-----GAGAAATGCATTATTGT-----TGTACAT-----GGCGTGTACTCA-----  
TGCCTCTAATCC-----TGT-  
ATATG--CG-ACGTTG-----AAAGTG-----CGCATC-TATTTCTATG-----  
-----ATTCACAA--ATGA--A-----  
-----TTAATAAATATTGAATTTTA--TA-----  
TCATGTT-----TTTCAA-----TTACA-T-----CTAT-----  
TGTTCCATTCAGTACATCA-----TAT-----  
AATACATGACTAAAAGCCCTAATACAATTGTTAATGCTAATCACTCCC-----  
AACCTATCTAAATATTTAATAAAT-----TGGTATTTAAATACTCTTAAGAAATGC-----  
GAGGTCTGAGGATGT-----AA-----ACGAGTCCAG--ATTTGGCAGGTTAGAAA-----  
-----ACATTTGT-----GTATCCCAACGCTTTCCTCAG-----  
-----GTTGTAGTTGAATTGGACTTGTATTGTGAT-----  
TATGTCGTGGTTCCCTCAG-----AAA--TGGTCTCTCGTGGTGTGGTTATCTTGAAATACAGGGGAT-----  
TTTTGACCGTCCAGATATA-----CACGC-----CATTCTCTGATTGAGCTGCAGTGA-----  
-----GTAG--TTCCCCTG--TGCGTGAATCCA--TGATTGTGACAG--CCTAAAG-----  
-----CAACGAAGTAAGAACAACCA-----  
-----CAA--GGTAGATCAA-----  
-----  
CCCGTCGTCGTCGTTG-----  
TCTTCTTGGCGATTTCGGTGTGACCTTGATAG-----GAACCTGAGT-----  
AGAGTGGCCCGTTGAGGGAGACGAAGATCGCATTCCTTACAGCCAGTTTCGAAGTGCTGAGTTCT-----  
TTTCTTCTTCCAGATACTCTTTATA-GCTGGAATTGGGTCTGGATTGCAGAGGAAGATAGTGGGGATCCCGCCTTTA--  
-ATTTGAACTGGTTTCCCCTACTTGGTGTGCTTTGCCAGTCCCTTTGGGCC--CCCATGAATCTTT-----A--  
AAGT--G-----  
CTTTAGATAATGCGGATCTACGTCATCAATGACGTTGAACCAAGCATCATTAAGTACACCTTTGGACTCAGATCCAA--  
--ATGACCACACAAGTAATTAT--GTGGTCCCTAA-----  
TGACCTGGCCACATCGTCTTCCCCTTCTACTATCACCTCTATCAC-TATACTTACCGGCTTTAA-----  
-----  
AGGC-----C-----  
-----GCGCAGCG-GCACTCAC-----A-----  
-----  
-----ACATTATCG----ACCG-CCCACTCATCAAGTTCTTCGGGAACTTGGTCAAATGAA--G-----  
AAGAAGA--AAAAGGAGA---AATATATCCACTATTGGAGGAGTAAAA-ATCCTATCTAAATTAATTT--  
TAAATTATGAAA--CTGTAAAACAAAATCTTT-AGGAGCCTT-----TTCCCTCAGTAT-ATTGAGGGCC--  
GAAGCT-----TTG-----GACCCTGAATTGAT----TGCCCTCGGC-ATATGCGT----  
CGTTGGCAGAT-----TGGCAACCTCCTCTA-----  
-----GCCGATC--TTCCATCGATCTGGAAAA-----CTCCATGA--TCAAGCACGTCT-  
CCGT-----CTTT--TTCCATGTAGGATTTG-  
ACATCTGTTGAGCT---TTTAGCTCCCTGAATGT----TCGGATGGAA-----AT--

GTGCTGACCTGTGTGGGGATGTGA-----  
GATCGAAGAATCTTTGATTCTTACACTGGAACCTTTCCTTCGAATTGGATGAGAACATGCAAGTGAG-GAGACCCATC---  
-----TTCGTGTAATTCTCTACAGATTCTGATAAATAG---T-----TTATTTACTGGGGTT---  
-----TCTAGGGTTTTAATTTGGGAAAGTGCCTCTTCTTAGTGAGAGAGCA---  
GTGTGGATATGTGAGGAAATAAT-----TTTTGGCATTATTCTGAA-----  
-----TTTAT-----TTGG---  
GGGAGCCA-T-----T-GAC---TG-----GT---CAATCGGTGTCTCT-  
-----  
-----CAAACCTG---GCT-  
-----ATGCAA---ATGGTGT-C-----TGGGGTCTT-----  
ATTTATATG---TGGACACCAAATGGCATTATCGTAATTCCTCCAAAAGAAA-----TTCAA-  
-----AATTC-----AAAG-----CGGCCATCCGTA-----  
-----TAATATT  
>TYLCSV\_X61153  
-ACC-----GGATGGCCGC-----  
-----  
GCTCCCCGATAAAGAAGTGGGTCTACGCAGTAGTTTCTGTGCGAC---CAATGAA-ATTGCAG-----  
-----CCTCAA-----GCTT--  
AAATAACTGTTTCTCAGCTGT-----GTTAT-----AAACTTGCTCCCTAAGTT---  
-TAAAAAATATACAAAATGTGGGATCCATTATTAATGAATTTCTGAT-----  
TCAGTCCATGGTCTCCGATGCATG---CTCGCAATTAATA-----TTTGCAG-----  
CTAGTTGAAGAAACCTACGAACC-----TAATACCCTTGGTCA-----CGACTTAATTAGGGAT-  
CTCATC-----TCCGTCATTCGTGCTCGTACT-----ATGCCGAAGCGAAC-----C-----  
-----GGCGATATA-----CTAATTTCAACGCCCG-----TCTCGAA-----GGTT---  
CGTCGAAGACTGAAC-----TTCGA-----CAGCCCGTA-----TACCAGC---  
CGTGCTGCTGCC-----  
-----CCA---CTGTCCAAGGCAT---  
CAAGCGTCGATCATGGACTTACAGGCCCAT-GTATCGAAAGCCGCG-----GAT-  
-----GTACAGAATGTACAG-----  
AAGCCCTGATGTACCTC-----CGGGTTGTGAAG-----  
GTCCCTG-----TA-----AAGTGCAGTCGTACGAGCAGCGTGATG---  
-----ACGTCAAGCATACCGGTG-T---TGT-G-----CGTTGTGTTAG-----  
TGATGTAAGTGGGGTTCT-----GGTATTACTCATAGAGT-----TGGTAA-  
-----ACGTTTT-----TGT-ATCAAGTCAA-----  
TTTATATATTAGGAAAGATT-----TGGATGGATGA-----  
AACATAAAAA-----AACAAAATCA-----  
TACTAACCAAGTGAT-----GTTTTCTTGTTCGAGACCGAAGGCCTTAT-----  
-GGAAGTACTCCTATGGATT-----  
-----TTGGTCAAGTTTTT-----AACATGTTT-----G-----  
-----ATA-----  
ATGAACC-----CAGTACTGCTACG-----GTGAAGAACG---A-CTTACGGGATAGGTATCAA-----  
-----GTAATGAGGA---AG-----TTTCAT-----  
GCTACGG-----TTGTTGGAGGTCCGTC-----  
-----AGGGATGAAGG-----  
-----  
-A-----GCAGTGTGCTGGAAGAGATTTT-----  
-----TTAAA---ATTAATACCC-----  
ATGTAGTTTATAATCACCA--A-----GAGCAGGCGAAGTATGAAAATCATACT-----  
-----GAGAAATGCCTTGTTAT-----TGTATAT-----GGCTTGTACTCA-----  
TGCTTCTAACCC-----AGT-  
GTACG---CT-ACGTTG-----AAAATA-----CGTATT-TATTTTTATG-----  
-----ATGCTGTA---ACAA---A-----  
-----TTAATAAAAATTAATTTTA---TT-----  
TCATGAT-----TTTCAG-----TTACA-T-----CAAT-----  
TGTTCTTTCAAATACATGA-----AAC-----  
AATACATAATCAACTGCTCTAACAAACATTATTTAAAGAAATTACACCC-----  
AAATTATTCAAATATTACAGACT-----TGATATTTAAAGACTCTTAAAAAATGA-----  
CCAGTCGGAGACTGT-----AA-----GGTCGTCCAG--ATGTGGAAGTTGAGAAA-----

-----ACATTTGT-----GAATCCCAGTTCCTTCCTCAA-----  
-----GTTGTGGTTGAATCTGATTT-----GGAAT-----  
GTTAGTGTGTTGTATTTGTTGTTGAA--TGGGTTCTGATTGTGTCTGGTTATCGTGAAATATAGGGGAT-----  
TTGTTATCCCGAAGGTATA-----AACGC-----CACTCGTTGCTTGATGCGCAGTGA-----  
-----TGTA--CTCCCCTG--TGCGTAAATCCA--TGATTTATGCAG--TCTAAGT-----  
-----GTATGTAATAAGAGCAGCCA-----  
-----CAG--TCCAGATCTA-----  
-----  
CCCTTCTACGCCTCACTTGC-----  
CTCTTCTTGGCGATGTGATGTTGTATTTTGATTG-----GTATCTGCGA-----  
ACAATGGCTGGTGGATGGTGACGAAGATTGCATTCCTTAGTAGCCCAGTTTTTTAATGCTTGATTTT-----  
TTTCTTCGTCGAGATATTCCTTAAATGATGATTGTGGG--CCTGGATTGCATAGGAAGATAGTGGGAATGCCTCCTTTA--  
--ATTTGAATGGGCTTGCCATACTTTGTGTTGCTTTGCCAATCTCTTTGGGCC--CCATAAATCTTT-----A--  
AAGT--G-----  
TTTTAAATAATGCGGGTCGACGTCATCAATGACGTTATACCAAGCATTATTGCTGTATACTTTTTGACTGAGGTCAAG--  
--ATGGCCGCACAAATAATTAT--GTGGCCCTAA-----  
TGAACGGGCCCACGTTGTCTTTCCTGTCCGGCTGTACCCTCAATCAC--TATACTCACCGGTCTCCA-----  
-----  
AGGC-----C-----  
-----GCGCAGCG--GCATCCAT-----G-----  
-----  
-----ACGTTCTCG----GAAA--CCCAGTGTTCAAGTTCATCAGGAACCTTGATCGAAAAGAA--G-----  
AAGATAA--AAAAGGAGA---AACATAAGGTGCCGGAGGCACCTGGAAA--ACCTTATCTAAATTACTATT--  
TATATTATGAAA--ATGTAGAACGTAATCTCT--AGGCGCTAA-----TTCTTTAATTAC--ATCAAGAGCC--  
TGCGAC-----TTACTT-----CCTGCGTTAAT---TGCCTTTCG--GTAAGCGT----  
CGTTGGCTGTC-----TGTTGTCCTCCCCTA-----  
-----GCAGATC--GTCCGTCGATCTGGAAAG-----TACCCCAT--TCAAGAACATCT--  
CCGT-----CCTT--GTCGATATAGGACTTG--  
ACGTC--GGAGCTCGATTTAGCTCCCTGAATGT-----TCGGATGGAA-----AT--  
GTGCTGACCTGGTTGGGGATACCA-----  
GGTCAAGAATCGTTGATTGGTACAATTGTATTTTCCTTCAATTGGATGAGAATATGGAGATGAG--GTTCCCATT---  
-----TTCATGTAGTTCTCTGCAAATTTTGATGAATAA--T-----TTGTTGTGGGTGTT---  
-----TGTAGGTTTGTATTTTGGGAAAGTGCATTTTCTTTTGTAAATCACA---  
TTTGGGATATGTAAGGAAATAAT-----TTTTAGCCTTGATACTAAA-----  
-----ACGAC-----CTGA--  
TCTTGGCATT-----T--TTG--CT-----GTCGTC--TGAATCGGGG--  
-----  
-----GACACTCAAAGTATC-----  
-----CAGCAA-----TTGGGGGAAT-----TGGGGGGCA-----  
ATATATATGA--TGCCCCATAATGGCATAGATGTAATTATTCAAAGTAATAAATTTATTTTTTAATTTTTTTTT---  
-----GGT-----AAAG-----CGCCATCCGTA-----  
-----  
-----TAATATT  
>USV\_EU445697  
-ACA-----GCGT--CC--CCTTTG--GCGAGGGGCCATGCTAAACCGGGCC-----  
CGA-----G-----  
CGGTCCTTTGCTGC---TTTG---TGTGGG--GCGTGATTT-----  
-----AA--ATCCAGCCC-----  
TTGCTTTCGACCGCCGACAGGCTTTGGTGC-----TATAA-----ATCGGT--  
CCTCTGCTTC-----TC--CTTTG---TATGGAGAG-----CCAAGGTGCGATCTATCCT---  
---TTGCCTCAAAGTGC-----TTTGCCGC-----GGGTACCCTCTGCAGCTCCGT-----  
CATCCTCAGGACTGCCGTGGAGT-----CGCGTCG-----  
GTGAGATAGTTATA-----TTCACTTTTGTTGCAGTG--CTAGC-----GTTGTAT-----  
-TTGCTGTGGTTGTGGGTGCTGAGAGATCTT-----ATCTTCATTGTTAAGG-----CTCGCGAGGTAGATCTA--  
--CGGAGGAGCTG--CAA-----TTCGG-----GGACCTT-----G--AG--  
AGTGCCCC-----GCCTGTCCCTTCTGCC-----GACGGTCCGCC-----  
GTCCGTTCCAG-----CGCCTTCTTGTCCCTGCC-----CAGCCTAGGTC---TCCC--  
TTTCTAGGCTGAGCTGGTAG--GCATGTCGTC--TTCCCTTG-----  
GCAAGAG-----GAAGA--G-----  
---G---TCCGATGAGGGCG-----CTTGGTCTAAGG-----

GGAAGTC-----TAAGAAGAAGGCAATGAGAGGCTCGTCTCTCG--CAG-----GCCTGGC---CCTGTCAG--  
GGGG-CCTCGT---CCTGCTCTC---CA----AATTG-----CGCAGTACATA-----  
GCTGCGGGCACCTCTATG-----GTCACTGTTCCG---TC-----CGGTGG--  
-----CGTTTGTGAGC-----TCCTTGCGACCTACG-----  
CAAGAGGATCCGATGAGGGT-----AACAGGCACAC-----  
CAACGAGACTG-----TTACGTACAA-----  
GGTCGCCCTGGATTAC---CACTTCGTG----CTCACAGCAGAGGCCTGCCGCTACTCG-----TC---  
CATCGGTGTAGGGGTGGCTTGGTTGGTG-----TATGAC-----  
----GCACAGCCCACCGCAACGC---CCCTC---AGGTCTCTGACATATTC-----C-----  
-----CACACGGCGACACTCTCGCTG---  
---CATTCCC-----GTATACTTGAAG-----GTCGGTAGGG---A-AGTGTGTCATCGCTTCGTG--  
-----GTGAAACGGCGGTGGA-----CTTTCACGATGGAGTCTG--  
ACGGG-----AGGATCGGCTCCGATAT-----  
-----TCCTAGAACGAC-----  
-----GGATGCTTGCCGCCCTGCAA-  
-----GCGGAGTATCTACTTCC--ACAAGTTTG-----  
-----TCACCGGACTCGGTGTAA-----  
AAACCGAGTGGAAGAACGT--A-----GCTGACGGAGGCGTAGGGGCCATTAAG-----  
-----AAGGGTGCT-CTGTAC-----CT--GGTCATT-----GCCC-----  
CCGGCAATGGT-----CT-----CACTTT-  
-----C-ACCGCGC-----ATGGAATTGCG-----CGGTTG-TACTTC-----  
-----AAGAGTGTTG-----GGAA-----  
-----TCAGTGATTCCCT-----CGA-----  
-----A---TAAT-----AAAATAATTT-----  
-----TTATAATTTCAATTGATGAGCATGCAATGCA-----TACAT--TACATAGTCAGCCGATGG-GCTGAC--  
-----GGA--AA-ACA-----CACATAA-----ACAA---  
GGCGGACAGGATAAAGGCGGGC--GGCTAAGGGAAGCCGCATGGGG-----C---AA-----CACAAAC-  
ACACCCA-----ACAGAT--  
-----CATTATTGAAC-ATG--CAGCCG-----  
CCGGCTTTAAACAGGGG-----  
-----AGA-----ACCACTTCTCCCCTG--G-C-----  
-----GTCATAA-----TGTATATGA-CG-----  
-----CAG---TTTGCCCTCGA-----  
-----AG---  
TACTCCCGCTGTGCGGGAGTCA-TATCCTTCAGCCAGTCCTC-----  
---AT-----  
CTTCATTGGCGAGGACGATGGTCGGGATGCTTCTTGATGCGACCTTCTTGCGTTTGGCATACTTGGGGTTGACGATGTAC  
TCCTTCTGACAG--CCAATTAAGTCTT-----C--CAACAAGGACAGTACTTGAAAG----GA----  
ATATCGTCTACGATATTATACATAGCCTCTTCGTGATAAG--AGG---TCCAGTCTAC----  
GTTATTCTGCCAGTAATTGT--GGCGACCTAG-----  
GCTTCTAGCCCAGGTTGATTTCCCTGTCTTGTAGGCCGACGATGTA-GAGGCTCTGCTTTCTG-----TCTGA---  
AG-----GTAGTTGCTGT--GTGTA-ACG-----TCATCGAGCCA-----  
GACAAGGT-----CAGACTCT-----GCCTG-----TTCTCGGG--TGCAGTTGTT--AA--  
TTAGCATGTATGCATCA-GGGTGTAC-----  
-----CTGGAAG-----ATGTTGGGT---TTGAG-CCAATCATCTATTGTCTCTTTG---CAGTGCAGCTCAGGCTCTG--  
-TCTGAGG--ATGAGGATG---GATGTAAGGCTCAGGAATGTCAGGGAAG-AGTTTATTGGCCGAGTACTC--  
AAAGTACTGCAG--CTTAGTGCCCACTCGTA-AGGGAGTTC-----ATTCTGAAGCCT-AGAGAGGTAC--  
TCCTGC-----TTGCTAGTAGAG-----TGCTCGATGATATCTCTAA-----CGATATCAT----  
CCTTTGTTGGTTAGGTGT--GTGCTCATCGCCTTGGTGAGG---AACGAAAGATTTCT-----  
-----TTC--GTGG-----AATGAATGT-----ACCTCTCTCCCATAGTGCGATT-  
GGAT-----CITT--CAGTATGTAGGCTCTT-  
ACCTT--GTCTACAGACTTAGCTGATTGGATGT-----TCGGATGAT-----G-----  
ATCTTC-----TA-----  
TGTCGAAGAATCTTGAATTTCTGGTCGTGACAGGCTTGACGCTCTGTGCAAGAGCATGGCAGTGCC-ATGTCCCGTC---  
-----TTGGTGTGCCTCTCGACACACTATGATGTATGC--C-----GGTCCCATGGAGCT---

-----ATCAAGCTCCATAGGGTGAGACCAATGGCTTCAGGCTCTAGAGGGCA---  
CTTGGGATAGGTGAGGTAGGTGT-----TTGCGTTCGGTGCTTGAA-----  
-----G-----  
CTCCGTGACGCCACGCTGTTGGAT-----GAAGATCC-----TACGGTAGCCATGAGCTC---TA---  
GCC-----TG-GG-----TG--CGATTTGCTCTC--CC-----CA---  
-----AACTCTAT-GCCT-----  
-----AGA---CAGTT-CGCGTCGAAA--TCCCACC--CACCCCATCC---CCT-----  
TCTTATA-----GTAGGGATTGTTGGG---CTGGGCCGGC-----  
TTTCAATTTTTTTT-----GGGCC--GGCCGAC-----AA-----  
-----AGGGGACGC-GAA-CA-----ATAATATT  
>WDIV\_JQ361910  
-ACCCGCGTCGCCCCTAGCATCGCGACGTGGA-  
ACGTGGGCCTCTACGTGACACGGAGCCGCATTAATTAAGTAAAGATGC-----C-----  
-----CGTTCGCTGTCTAGCTTTAATTGGTAGATGGTGCCTCATTTCCTC-----  
-----  
GGCCCGCCTGCCT-----TTCCTTTATAAAGAGG-----TGA-----  
-----CTCGGAGGTGACTTCGAT-----GGGGTCTGCTCGTCTAGGTGAGTT-----CT-----  
-CTCCGCTTGCT-----TACCCTGGAAGCATCGCATATATCCCC-----AATCTCCTCCCGCAGTTCAGA-----  
ACG---AGGAC--CCGTGGATC-----CGCCTGG-----  
TC-----TTCGTTTTTGTAGCGGTA--ATTGCTGCAATCGGTTTGCTTTAT-----  
CTGAGTTACCGCTGGTTCGTCAGGGATGTC-----ATCATACTCCTTCGGG-----CGAAGAGACAGCGGAGCA--  
-CGGAAGAGATT-GGT-----TTCGG-----CAATACT-----CC---  
AGCTCGGCCCGACGGT-----GGACAGCCTAGCACCAGACGA-----GGACCTGATCC-----  
CTCGGCTGCTG-----CACCTCCTTACT-----GAGGCCAGGCT-----  
TCTTGTTTACAGGACTTGCCGACGGATCCCTAACCGAT-GTCTCAGG-----  
TGAAGAA-----GAGGACCCGTCG-----  
---G---GGGGACGAAGTGG-----AGTGGTCAAAGC-----  
GCAAGCG-----GTTGAGGTGCTCCGGGTCGAAAGGATCGGCGAC--CAA-----GCTTAGGAAGCTCCCGGT--  
GAGG-----CCAGTCTG--CA---GATTC-----AGTCGCTGTAC-----  
TATACGCTCACCACCTAT-----GTAGACTTCAAG--AC-----AGGTGG--  
-----TGAAAGTTATC-----TGATGGCCTCTTACG-----  
CCCGTGGTTCCGACGAAGGT-----GAGAGGCATAC-----  
TAACGAGACTA-----TGACGTATAA-----  
GGCAGCCCTGAACCTA--CATCTGTCT----GCCTCCTCGGATGCTTGTAATATTCT-----AA---  
TACAGGCACAGGCTGCATCTGGTTGATT-----TACGAT-----  
---GCACAGCCACGGGAAATAA--ACCGT---CTCCGAAGGACATCTTC-----G-----  
-----GGTACTCGGACAGCCTCAACT---  
---CCTGGCC-----AACAAACATGGATG-----GTTTCTCGGG--A-GCAGTGCCATCGTTTCGTC--  
-----GTTAAGAGGCGATGGA-----CGTTCACCTGGAGACTA--  
ACGGG-----AGGCTCGCATCTGATGT-----  
-----TCCTCCTTCGAA-----  
-----CGTCGCTGGCCTCCGTGCAA--  
-----GAAGAGCATTAACTTCC--ACAAGTTCG-----  
-----CCAAGGGTCTGGGTGTGC-----  
GTACTGAGTGGAAGAATAA--A-----ACAGACGGGGGATTGGCTCGATCAA-----  
-----  
-----AAAGGTGCC-TTGTAC-----TT--TGTAATA-----GCTC-----  
CGGGTAACGGA-----GT-----AGAGGG--  
-----A-CGGATGT-----TTGGTACGATC-----CGTATG-TACTTC-----  
-----AAGAGTATCG-----GTAA-----  
-----CCAGTAAAGGTTG-----CT-----CAT-----  
-----ATATGTAAT-----AAACCATATT-----  
-----TTATTAATAAAATG-----GCCAT-GCTTAC-----  
-----AAGAA-AAAACA-----CACATAC-----  
AATACAGGGTGGACAGGACAAAGGCGGGC--GGATAAGGGTGGCCGCAAGGGG-----  
CAAAAC-ATTAATA-----  
-----  
AAAAAC-----ACACTCTGTAAAC-AATTTTCGGCCC-----C-----

-----GCCGA-----AGAACTTCTCCGTTG--G-T-----  
--TCCATCA-----TGTAATGA-TG-----  
-----  
GAA--TTGGCTTCGA-----  
-----  
-----AG---  
TACTCCTGTTGTTCCGGGGTCA-TTGTCTTCAGCCAATCCTC-----  
----AT-----CGCTGTTAACGAGGATGATTGAGGGGATGCCTCCTTTTATTAACCTTCTT---  
CTTACCGTACTTAGGGTTTACGGTGAAGTCCCTCTGGGCC--GCTACCAACTGTTT-----C--  
CAGCAAGGGCAGAAATTTAAATG---GA---ATGTCGTCGATTATGTTATATGCCGCTTCTGGATCGTAGA---CTG--  
-TAAAGTCTAC---ATTATTCTGCCAGTAGTTGT--GTCGGCCCAG-----  
GGACCTTGCCCATGTAGATTTCCGGTCTTGTGGACCGACGATGTA-GAGGCTCTTTGGCCTT--  
GTTCTGCAGATGG-----ATCCTGGAATT--TTCCT-GCA-----A-----  
CCA---TGTCAGTT-----CTTGTAACA-----GCCTC-----  
TGCTACGCTGTTTATGGTTGGTGTGT--TTAGCATATAACAATAA-GGGTGTAC-----  
-----  
-----CTGAAA-----AGGTTAGAA----TCTAT-  
CCAGTCTTGATAGTTTCGTAG---CAGTAGAGTCTGGTACAG---ATTGGCC--GTGGGGATT----  
GCTGTACTCTGGTTGTTGTTTCAGGGAAG-AGCTTCGAGGCACTATACTC--GAAGTTGTATAG--  
TTTAGTGGCCAGTCATATGGGAAGTTT-----CTTCTG-CTTT-CTTAGGTAG--TCAGAC-----  
TTGTTGGTGGAG-----TTCTCTATGATATCTTTCA---TGATATCAT---CTCTGGATCGTTTAT-----  
-----TGGAATGCCTAGGACTGGTTCCTGCATTT-----  
CTCCCTC--TGGG---GATAAATGC-----TCCCTTCTCGCTAAAAGTAATT-GGAC-----  
-----CCTT--AAGGATGTAATCTCGGCATAAT--GTTGG-  
GTTCTTTGCAGCTTGTATGT---GAGGATGAT-----G-----ACCATC-----  
AA-----AATCAAAGAAATGAGGATCATTGGTAGAAATTTGCTTGGGAGTCTGTAGGAGAGCATGGAGATGAG-  
GTGTACCATC-----CTGGTGTAGTTCGACAGAAGCAACAGCATAGAT--A-----  
GGACTCCAAGTAGAA-----ATGAGTCCCAGAAGTGTGAACCATTCCATATGGGCAGGAATTACA---  
GTGGGAAATGTAAGAAAGCAGT-----TATTACTGCGGTACCTGAA-----  
-----GG--  
TTGAAGACGAGGCTTTGGGGTTAGCCGAGTTGTT-----CTC-----  
AGCGGAAGTCTGAGACAT---AGCGTGTC-----TGATGCTAACACTCTCTGGGACTTAGCCGCGTTT--  
-----CCG-----TCGGCTCGAG-TTTT-----  
-----ATCGATACTCTCTCGATGCGGATCTTCCCAGC--  
GCTGCGGCGG--GGT-----TTTTATA-----ATGGTTTCCGATCTGACACCTGGGACCAG--  
-----GG-----GGGCCAGGAGCGAT-  
-GGCGA-----  
-----AGGGCGCGC-GCGGCA-----  
ATAATATT  
>WDV\_X02869  
-ACC-----CC---GC-----GTGGTGGCCCC-----  
-----G-----ACGCGCA-  
CTCGGCTTTTCGTGAGTGC GCGGAGG---CTTTTGGACCACATCTTTTCTGATCACTTTCGTGGAAGATGTTGATT----  
-----TATCACACTTTTGACG-----GGGAAATCTGTGCC-----  
-----ATGCCTTAGCTTATAA-----GGAAGTGCG-TG-GTAGC-----CCA-----  
TCTCGATGGAG--CAGGCAATAGCCCC-----CCCGCTTCTTATACG-----  
GGACTATCAATACCAGACCCC-----TTCCA-----TTCCC---G-----  
GTTCTC-----CGACTACGCCT-----GGCGAACATTTGTG-----  
TTCGTTACCTTTGGTTG--CTAATAGCCGTAGGCGTTGCTTGG-----  
CTTGCTTACACTCTGTTTCTGAAAGATTTA-----ATTTTAGTGTGTAAGG-----CGAAGAAGCAAAGGAGGA--  
-CCGAGGAAATT-GGT-----TACGG-----GAATACACC-----GGCCAGA--  
TTA-----AATGGTG-----  
-----ACCAACAAGGACTCCCC-----  
-----AGGTAAGGGGAA-----GCGGAAGA-----TGGAAGAA---GGTG-  
-----AATCCA-----GCGGAAGGTG-----GAAG--  
GGGG-----CTGTGTATAAGC-----GGCGTAA-----  
ACAGGCGTATA-----AGGTAG-----TACCTGTGA-----  
AGCCCCAGCTCTC---TG---CGTAT-----TCCGCTACAAC-----TGGTTGAATAGCGACAGG--  
-----ACCAATATTG-----TTGTGGGTAATACCCCCGGGTCGATC-  
-----TGATTACCTGTTTTG-----CTCAGGGTAAGGCCGATAAT-----

-----AATCGGCATAC-----AAATCAGACCG-----  
TCCTATACAAATTTAACATACA-----GGGTACCTGCTAT-----  
ATGTCGGATGCATCAGCTCCGTTTCATC-----GGTCCAGTCCGCCT---CTACCACTGGTTAGTC-----  
-----TATGAT-----GCAGAGCCGAAACAGGCTAT---GCCAG---  
ACGCCACTGACATCTTT-----  
-----ACGATGCCTTGGAAATCTGCTG-----CC-----  
GAGTACGTGGACT-----GTGCAACGTG---C-TTGGTCGCATCGATTCTGTG-----  
GTGAAAAGGAAGTGA-----CCGTGAACCTTGTACTG---ATGGA-----  
-----CGGAAGGTCGGGTCTAAGACCGTTGA-----  
CCAGCGCTACAA-----  
-----CTGGGTAG-----TCGG-----CAAGAA-----TATCGTTG-----  
-----ACGCAA---ATAAGTTCT-----  
-----TCAAAGGTTTGCCTGTCA-----CGACGGAGTGGATGAACAC---G-----  
GGTGACGGCAAGATAGGCGACATTAAG-----  
-----AAGGGAGCA-CTGTAT-----  
CTTAT---TAGCAGT-----ACTCGTGGTGGTGTTA---CTGGTGATAGT-----  
-----GC-----CTCTAC-----G-GCGTTTG-----  
ATGTTGTATGTGCCATACGCACGCGTGTATTTC-----AAAGCCATCG-----GCAT-----  
-----  
TCAGTAATAAAAATAATATTT-----TATTTA-----TCTCATGTC-----  
-----ATT-----  
-----C---GATTAC---AG---AGGCTCGGCTACGAGC-----A-----  
-----AAGACAAACCAAA-----TATAACAAA-----C-----  
AACAACCCTTACA-----CAATGACATCGGAA-----AACGAAATA-----  
-----  
-----CAACACCCTGAGATATTACATTTATAG-----  
AAACTGTACGCCGTCGCGCTAGGA-----CAGTCACTGCGAAGCAGTGACGTC-----  
-----TTCG-----CCG---GAGGCGAACGAGTAG-----  
-----TTGATGAACGTCTCGCCTT---C-A-----TACATGT-----  
-----AGTGAACAA-CA-----  
-----GTG---TTAGAGTACA-----  
-----  
-----TG---TAATCCGACTGTTCCGGGAGTCA-----  
TATCCTTGAGCCAATCTTC-----GT-----  
CTGGATTAATAAAATGATGCAAGGTATTCCACCCCGT---  
ATGACCTTTTCGCTTACCATATTTTGGATTGACCGTGAAGTCACGCTGAGCC---CCGACGAAGCACTT-----C---  
CAGTTGGGTGTGAACTTGAATG---GA---ATGTCGTCGATGATATTTACTTGGCGTTGACGTCATATG---TTG---  
-TGAAATCAAC---TAGACTGTTATAATAATTGT---GTGTCCCTAG-----  
AGACCTTGCCAGGAAGTCTTTCTGTTCTGTTGGCCCGCAGATGTA-GATGGACTTATGCC-----TCCCCGGT---  
-----GACTCCTGGAATA--ATCGT-CCA-----T-----CCA-----  
CTCTAAGT-----CAGAT-----TGCGC-----TTGATCC---GCAGGAGTGAAGTACA---  
-AAGGATATAGGATTCG-AGGCTTAC-----  
-----  
-GGAGTAG-----AGATGTTCA---TTTTT-CCAGCTTTCAATGGTCTCATGG---CAAATGAGTGATTCGGT---  
TGGAAC-----TCAGG---TGTTGTAAGTGGCAACTGGGTCAGGAAAT-AGATGGCGTGCCGTGTACTC---  
GAAGTCTTTGAG---ACGGATAGACCATTCAA-CGAAAACG-----ATTGCAAACCAT-GCTGAGGAAT---  
TCCTCG-----CGAGAGGAATA-----GATTCAATGATCTGTTTCA-----TATCCGCAT---CACG-----  
-----GTCTTTACGACCTGGAGTTGAAACAGCCACGAAT-----  
-----GTTCCCC--A---CTCAGCTGTGTT---TACA-----TCGGAGTCA-ACCT-----  
-----CCTT---CGTGATGTAATCACGA-ACTTG---  
GTTGCAGTCTTTGGCAGCTTGTATAT---TTGGATGGAATATGGAGAATGGAGATGTA-----TCCATACG-----  
-----GA-----GGTTAAGGCATTGGGATTTGGTGTGGAAGCACGAAGCTTGTCTGCACGAGAACGTGCAGATGTG-  
GTGATCCATC-----TTCGTGGAGCTCTCTAACAGCAGCGATGTAGAG---G-----  
GGCTCATATTTGTTTC-----AAGAGAGTGCGAAGTGAATCCAAGGCGTACTGTGGCTCAAGGGTACA---  
TTCAGGATATGTTAGAAAGAGGT-----ACTTGAATAGACACGGAA-----  
-----CCTGGGTGC-  
AGATGAAGAGGCCATGGTAGTGA-----ACAG-----AAGTCCGGCAGGTCTTAGCGAAAAACG---  
-----GGGTG-----TGC-----CAG-----  
-----AAACTCTAT--CCT-----

-----CTACCCT--GCGTGGAGGTGTGAATTCTGCACA--CTGCAAATGCAATGTG-----TCCAATG---  
---CTTTATATAGG-----GCAGGTTTTGGCGGGAGAACAGGGCCCTAGTGTTCACGGTAGCGTAGCG-----  
-----AATCTTGTGGGCC-CTGTTCGG-----  
TG-----TGC-  
GGTCGGGG-----GGCCTCCACGCGGGTT-----ATAATATT
